# Supplementary material for: Multi-species, multi-transcription factor binding highlights conserved control of tissue-specific biological pathways
Source: eLife. 2014 Oct 3;3:e02626. doi: 10.7554/eLife.02626 (PMC4359374; doi:10.7554/eLife.02626)
Supplement: Supplementary file 1. — Motif enrichments of CRMs and singletons as well as overlaps of CRMs and Singletons with ENCODE data. DOI: http://dx.doi.org/10.7554/eLife.02626.027 [file elife02626s006.xlsx]

## Sheet: Supplemental File 1A_motif
A) HUMAN
Factor	Occupancy	Conservation	Primary motif	Secondary motif
CEBPA	CRM	Human only	CEPBA;ARID3A	HNF4A;ONECUT1;FOXA1/FOXfam; RUNX1	*
CEBPA	CRM	Anyshared	CEBPA	ONECUT1;PPARG::RXRA;	*
				FOXA1/FOXfam;ZEB1;HNF4a
CEBPA	CRM	Deep	CEBPA;Sp1	USF1;HNF4a;PPARG::RXRA;	*
CEBPA	CRM	Beyond primates	CEBPA;Sp1	FOXA1/FOXfam;ESR1;TFAP2A	*
CEBPA	CRM	Primates only	CEBPA	HNF4A;Esrrb;FOXA1/FOXfam;INSM1	*
CEBPA	Single	Human only	CEBPA;ARID3A	CEBPA
CEBPA	Single	Anyshared	CEBPA	CEBPA;ARID3A	*
CEBPA	Single	Deep	CEBPA;Sp1	CEBPA
CEBPA	Single	Beyond primates	CEBPA	CEBPA
CEBPA	Single	Primates only	CEBPA	CEBPA
FOXA1	CRM	Human only	FOXA1/FOXfam;SP1; ARID3A	ONECUT1;HNF4A	*
FOXA1	CRM	Anyshared	FOXA1/FOXfam;Sp1	HNF4a;CEBPA;ONECUT1	*
FOXA1	CRM	Deep	FOXA1/FOXfam;Sp1	HNF4;ONECUT1;CEBPA	*
FOXA1	CRM	Beyond primates	FOXA1/FOXfam;Sp1	ONECUT1;HNF4;CREB1	*
FOXA1	CRM	Primates only	FOXA1/FOXfam;CEBPA	ONECUT1;HNF4;CEBPA	*
FOXA1	Single	Human only	FOXA1/FOXfam;ARID3A	FOXA1/FOXfam
FOXA1	Single	Anyshared	FOXA1/FOXfam	FOXA1/FOXfam
FOXA1	Single	Deep	FOXA1/FOXfam	FOXA1/FOXfam
FOXA1	Single	Beyond primates	FOXA1/FOXfam	FOXA1/FOXfam
FOXA1	Single	Primates only	FOXA1/FOXfam	FOXA1/FOXfam;ONECUT1	*
HNF4A	CRM	Human only	HNF4A; CEBPA;SP1;ARID3A; FOXA1/FOXfam	FOXA1/FOXfam;CEBPA;ONECUT1	*
HNF4A	CRM	Anyshared	MEF2A;Sp1;HNF4A;FOXA1/FOXfam	FOXA1/FOXfam;ONECUT1;	*
HNF4A	CRM	Deep	Sp1;HNF4A;FOXA1/FOXfam	FOXA1/FOXfam;NFATC2	*
HNF4A	CRM	Beyond primates	Sp1;HNF4A;FOXA1/FOXfam	FOXA1/FOXfam;ONECUT1	*
HNF4A	CRM	Primates only	MEF2A;CEBPa;HNF4A;Sp1	FOXA1/FOXfam;ONECUT1	*
HNF4A	Single	Human only	HNF4A;SP1	HNF4A	*
HNF4A	Single	Anyshared	HNF4A;Sp1;FOXfam	Sp1;HNF4A
HNF4A	Single	Deep	Sp1;HNF4A	Sp1;TFAP2A	*
HNF4A	Single	Beyond primates	Sp1;HNF4A	TFAP2A
HNF4A	Single	Primates only	HNF4A;Sp1	HNF4A:Sp1
ONECUT1	CRM	Human only	ONECUT1; ARID3A;FOXfam	HNF4A;FOXA1/FOXfam;CEBPA	*
ONECUT1	CRM	Anyshared	ONECUT1;GATA	ESR2;HNF4A;FOXA1/FOXfam	*
ONECUT1	CRM	Deep	ONECUT1;FOXfam	HNF4A;MZF1 1-4	*
ONECUT1	CRM	Beyond primates	ONECUT1;Sp1;FOXfam	HNF4A;FOXA1/FOXfam;CEBPA	*
ONECUT1	CRM	Primates only	ONECUT1;HNF4a;FOXfam	HNF4A;FOXA1/FOXfam	*
ONECUT1	Single	Human only	ONECUT1;ARID3A;Sp1	ONECUT1
ONECUT1	Single	Anyshared	ONECUT1	ONECUT1
ONECUT1	Single	Deep	ONECUT1	ONECUT1
ONECUT1	Single	Beyond primates	ONECUT1;Sp1	ONECUT1;TFAP2A	*
ONECUT1	Single	Primates only	ONECUT1	ONECUT1
B) MOUSE
Factor	Occupancy	Conservation	Primary motif	Secondary motif
CEBPA	CRM	Mouse only	FOXfam;CEBPA;ARID3A; SP1	HNF4A;ONECUT1	*
CEBPA	CRM	Anyshared	CEBPA;Sp1;FOXfam	HNFA;FOXA1/FOXfam;ONECUT1	*
CEBPA	CRM	Deep	CEBPA;Sp1	FOXA1/FOXfam	*
CEBPA	CRM	Beyond rodents	CEBPa;Sp1	Sp1;HNF4A;FOXA1/FOXfam; ONECUT1	*
CEBPA	CRM	Rodents only	CEBPA	NR4A2;FOXA1/FOXfam;HNF4A	*
CEBPA	Single	Mouse only	CEBPA	CEBPA
CEBPA	Single	Anyshared	CEBPA;FOXfam	CEBPA
CEBPA	Single	Deep	CEBPA;SPI1	CEBPA
CEBPA	Single	Beyond rodents	CEBPA	CEBPA
CEBPA	Single	Rodents only	CEBPA	CEBPA
FOXA1	CRM	Mouse only	FOXA1/FOXfam;SP1;MEF2A;CEBPA; NFIC	HNF4A;ONECUT1	*
FOXA1	CRM	Anyshared	FOXA1/FOXfam;Sp1	HNF4A;ONECUT1	*
FOXA1	CRM	Deep	Sp1;FOXA1/FOXfam	NR4A2;ONECUT1;HNF4a;	*
FOXA1	CRM	Beyond rodents	Sp1;Sox5;FOXA1/FOXfam	ONECUT1;Sp1	*
FOXA1	CRM	Rodents only	Sp1;FOXA1/FOXfam	ONECUT1;HNF4A	*
FOXA1	Single	Mouse only	FOXA1/FOXfam;ARID3A	FOXA1/FOXfam
FOXA1	Single	Anyshared	FOXA1/FOXfam;Sp1	FOXA1/FOXfam
FOXA1	Single	Deep	FOXA/FOXfam	FOXA1/FOXfam
FOXA1	Single	Beyond rodents	FOXA1/FOXfam	FOXA1/FOXfam
FOXA1	Single	Rodents only	FOXA1/FOXfam	FOXA1/FOXfam
HNF4A	CRM	Mouse Only	HNF4A;Sp1;FOXfam; ARID3A;NFIC	FOXA1/FOXfam	*
HNF4A	CRM	Anyshared	Sp1;HNF4a;FOXA1/FOXfam	CEBPA;FOXA1/FOXfam	*
HNF4A	CRM	Deep	Sp1;HNF4a;FOXfam	FOXA1/FOXfam
HNF4A	CRM	Beyond rodents	Sp1;HNF4A;FOXfam	FOXA1/FOXfam;CEBPA	*
HNF4A	CRM	Rodents only	Sp1;SOX5;HNF4a;	FOXA1/FOXfam;CEBPA	*
			FOXfam
HNF4A	Single	Mouse only	HNF4A;Sp1	HNF4A
HNF4A	Single	Anyshared	Sp1;HNF4A	Sp1
HNF4A	Single	Deep	Sp1	Sp1
HNF4A	Single	Beyond rodents	Sp1;HNF4a;FOXfam	HNF4A
HNF4A	Single	Rodents only	Sp1;HNF4A;ZEB1	TFAP2A
ONECUT1	CRM	Mouse only	ONECUT1;CEBPA;Sp1;FOXfam	HNF4a;NR4A2	*
ONECUT1	CRM	Anyshared	ARID3A;Sp1;ONECUT1;FOXfam	HNF4A	*
ONECUT1	CRM	Deep	FOXA1/FOXfam;ONECUT1	HNF4;HIF1A::ARNT;Esrrb	*
ONECUT1	CRM	Beyond rodents	Sp1;ONECUT1;FOXfam	Esrrb	*
ONECUT1	CRM	Rodents only	Sp1;ONECUT1;FOXfam	Esrrb;HNF4A;	*
ONECUT1	Single	Mouse only	ONCEUT1;ARID3A	ONECUT1
ONECUT1	Single	Anyshared	ONECUT1	ONECUT1
ONECUT1	Single	Deep	ONECUT1	ONECUT1
ONECUT1	Single	Beyond rodents	ONECUT1	ONECUT1
ONECUT1	Single	Rodents only	ONECUT1	ONECUT1
C) Motif enrichment in CRMs broken down by their TF content
TFs comprising CRM	Number of CRMs	CRM mean size	Discovered motifs which were assayed	Discovered motifs of other TFs
Module 2TFs:
CEBPa;FOXA1	1599	267	CEBPA,FOXA1	Sp1
CEBPA;HNF4A	3432	297	CEBPA,HNF4A	MEF2A,NFATC2,Sox5, SP1,NFIC
FOXA1;HNF4A	7831	328	HNF4A,FOXA1	MEF2A,SP1
HNF6;CEBPA	882	320	HNF6,CEBPA	ZNF354C,Ddit3::CEBPA, Lhx3,NFIC
HNF6;FOXA1	1561	313	HNF6,FOXA1	Sp1
HNF6;HNF4A	1627	345	HNF6,HNF4A	SP1,NFACTC2, FOXfam,NFIC
Module 3TFs:
CEBPA;FOXA1;HNF4A	5820	379	CEBPA,FOXA1,HNF4A	MEF2A,NFATC2,Egr1, Sp1,NFIC
HNF6;CEBPA;FOXA1	424	366	HNF6,CEBPA,FOXA1	Sp1,HLF
HNF6;CEBPA;HNF4A	812	378	HNF6,CEBPA,HNF4A	Esrrb,HLF,Sp1
HNF6;FOXA1;HNF4A	2793	410	HNF6,HNF4A,FOXA1	MEF2A,HNF1A,Sp1
Module 4TFs:
HNF6;CEBPA; FOXA1;HNF4A	3584	455	CEPBA,HNF6, HNF4A,FOXA1	MEF2A,SP1,NFIC

## Sheet: DeepCRM_vs_ENCODE
Track	CellLine	TranscriptionFactor	Overlap	TotalHits	Ratio	Mean	SD	Zscore	Enrichment	p-value	Corrected p-value	Null Model
TxnFactorChIPV3	HepG2	SP1	2576	5046	0.510503	145.836	77.8022	31.2351	17.6637	9.29e-152	7.12543e-149	DNaseI_Any
TxnFactorChIPV3	HepG2	HNF4G	2063	5046	0.408839	100.713	62.8402	31.2266	20.4839	9.29e-152	7.12543e-149	DNaseI_Any
TxnFactorChIPV3	HepG2	HNF4A	2032	5046	0.402695	98.999	61.9132	31.2211	20.5255	9.29e-152	7.12543e-149	DNaseI_Any
TxnFactorChIPV3	HepG2	RXRA	1932	5046	0.382878	90.9241	59.0089	31.2	21.2485	9.29e-152	7.12543e-149	DNaseI_Any
TxnFactorChIPV3	HepG2	EP300	2623	5046	0.519818	166.117	78.806	31.1764	15.7901	9.29e-152	7.12543e-149	DNaseI_Any
TxnFactorChIPV3	HepG2	FOXA2	2568	5046	0.508918	170.611	76.9575	31.1521	15.0518	9.29e-152	7.12543e-149	DNaseI_Any
TxnFactorChIPV3	HepG2+forskolin	CEBPB	1811	5046	0.358898	97.046	55.0589	31.1295	18.6613	9.29e-152	7.12543e-149	DNaseI_Any
TxnFactorChIPV3	HepG2	FOXA1	2905	5046	0.575704	230.507	85.9489	31.1172	12.6026	9.29e-152	7.12543e-149	DNaseI_Any
TxnFactorChIPV3	HepG2	HDAC2	2020	5046	0.400317	114.492	61.2788	31.0957	17.6432	9.29e-152	7.12543e-149	DNaseI_Any
TxnFactorChIPV3	HepG2+forskolin	HNF4A	1377	5046	0.272889	63.0879	42.2833	31.074	21.8267	9.29e-152	7.12543e-149	DNaseI_Any
TxnFactorChIPV3	HepG2	NFIC	1815	5046	0.359691	104.914	55.0441	31.0676	17.2999	9.29e-152	7.12543e-149	DNaseI_Any
TxnFactorChIPV3	HepG2	ARID3A	1656	5046	0.328181	95.7892	50.2382	31.0563	17.288	9.29e-152	7.12543e-149	DNaseI_Any
TxnFactorChIPV3	HepG2	MYBL2	1977	5046	0.391795	126.095	59.6512	31.0288	15.6787	9.29e-152	7.12543e-149	DNaseI_Any
TxnFactorChIPV3	HepG2	CEBPB	2316	5046	0.458977	197.471	68.484	30.9347	11.7283	9.29e-152	7.12543e-149	DNaseI_Any
TxnFactorChIPV3	HepG2	CEBPD	1325	5046	0.262584	72.1918	40.5656	30.8835	18.3539	9.29e-152	7.12543e-149	DNaseI_Any
TxnFactorChIPV3	HepG2	TEAD4	1406	5046	0.278637	87.049	42.7722	30.8367	16.1518	9.29e-152	7.12543e-149	DNaseI_Any
TxnFactorChIPV3	HepG2	JUND	2020	5046	0.400317	202.56	59.0663	30.7695	9.97233	9.29e-152	7.12543e-149	DNaseI_Any
TxnFactorChIPV3	HepG2+forskolin	none	2801	5046	0.555093	363.549	79.2312	30.7638	7.70459	9.29e-152	7.12543e-149	DNaseI_Any
TxnFactorChIPV3	HepG2	TCF12	479	5046	0.0949267	12.4306	15.187	30.7216	38.534	9.29e-152	7.12543e-149	DNaseI_Any
TxnFactorChIPV3	HepG2	FOSL2	1618	5046	0.32065	136.003	48.3252	30.6672	11.8968	9.29e-152	7.12543e-149	DNaseI_Any
TxnFactorChIPV3	HepG2	TBP	1403	5046	0.278042	110.141	42.1797	30.6512	12.7382	9.29e-152	7.12543e-149	DNaseI_Any
TxnFactorChIPV3	HepG2	MBD4	806	5046	0.15973	40.8012	25.0346	30.5657	19.7543	9.29e-152	7.12543e-149	DNaseI_Any
BroadChromHMM	HepG2	StrongEnhancer	1988	5046	0.393975	237.964	57.4033	30.4867	8.3542	9.29e-152	7.12543e-149	DNaseI_Any
TxnFactorChIPV3	HepG2	MXI1	1612	5046	0.319461	161.003	47.6192	30.4709	10.0122	9.29e-152	7.12543e-149	DNaseI_Any
DNaseClusters	HepG2	none	3777	5046	0.748514	804.137	97.6457	30.4454	4.69696	9.29e-152	7.12543e-149	DNaseI_Any
TxnFactorChIPV3	HepG2	BHLHE40	1151	5046	0.228101	95.3337	34.7528	30.3764	12.0734	9.29e-152	7.12543e-149	DNaseI_Any
DNaseClusters	Huh-7	none	3279	5046	0.649822	660.179	86.3022	30.3448	4.96684	9.29e-152	7.12543e-149	DNaseI_Any
H3K27Ac_Broad	HepG2	none	3270	5046	0.648038	700.121	84.9051	30.2677	4.67062	9.29e-152	7.12543e-149	DNaseI_Any
TxnFactorChIPV3	HepG2	SIN3AK20	1343	5046	0.266151	143.481	39.7775	30.1557	9.36016	9.29e-152	7.12543e-149	DNaseI_Any
TxnFactorChIPV3	HepG2	none	4147	5046	0.821839	1198.18	97.8794	30.1271	3.46109	9.29e-152	7.12543e-149	DNaseI_Any
BroadChromHMM	HepG2	none	4026	5046	0.79786	1117.88	96.651	30.0889	3.60147	9.29e-152	7.12543e-149	DNaseI_Any
DNaseClusters	Huh-7.5	none	3324	5046	0.65874	793.222	84.2347	30.0444	4.19051	9.29e-152	7.12543e-149	DNaseI_Any
TxnFactorChIPV3	HepG2	ELF1	1235	5046	0.244748	124.937	36.9764	30.0208	9.88498	9.29e-152	7.12543e-149	DNaseI_Any
H3K4Me3_Broad	HepG2	none	3233	5046	0.640706	791.215	81.4415	29.9821	4.08612	9.29e-152	7.12543e-149	DNaseI_Any
H3K4Me2_Broad	HepG2	none	3933	5046	0.779429	1114.59	94.209	29.9165	3.52864	9.29e-152	7.12543e-149	DNaseI_Any
TxnFactorChIPV3	A549	CEBPB	1284	5046	0.254459	148.625	37.9809	29.8933	8.63917	9.29e-152	7.12543e-149	DNaseI_Any
H3K9Ac_Broad	HepG2	none	3325	5046	0.658938	877.659	81.8821	29.8886	3.78849	9.29e-152	7.12543e-149	DNaseI_Any
DNaseClusters	Hepatocytes	none	3054	5046	0.605232	751.095	77.1658	29.8436	4.06606	9.29e-152	7.12543e-149	DNaseI_Any
TxnFactorChIPV3	HepG2	REST	1027	5046	0.203528	112.021	30.7509	29.7545	9.16793	9.29e-152	7.12543e-149	DNaseI_Any
OpenChromSynth	HepG2	none	3555	5046	0.704518	1003.21	85.7792	29.7484	3.54363	9.29e-152	7.12543e-149	DNaseI_Any
TxnFactorChIPV3	HepG2	POLR2A	1883	5046	0.373167	325.117	52.3842	29.7396	5.79176	9.29e-152	7.12543e-149	DNaseI_Any
TxnFactorChIPV3	HepG2	YY1	1144	5046	0.226714	143.848	33.675	29.7002	7.95283	9.29e-152	7.12543e-149	DNaseI_Any
TxnFactorChIPV3	A549+EtOH_0.02pct	TCF12	1110	5046	0.219976	137.661	32.7715	29.6703	8.06327	9.29e-152	7.12543e-149	DNaseI_Any
TxnFactorChIPV3	HepG2	USF1	1002	5046	0.198573	111.704	30.03	29.6469	8.97011	9.29e-152	7.12543e-149	DNaseI_Any
DNaseClusters	RPTEC	none	2763	5046	0.547562	658.989	71.0099	29.6298	4.19279	9.29e-152	7.12543e-149	DNaseI_Any
TxnFactorChIPV3	HepG2	MAZ	982	5046	0.19461	107.652	29.5377	29.6011	9.12196	9.29e-152	7.12543e-149	DNaseI_Any
DNaseClusters	HRCEpiC	none	2876	5046	0.569956	766.645	71.2675	29.5977	3.75141	9.29e-152	7.12543e-149	DNaseI_Any
TxnFactorChIPV3	T-47D+DMSO_0.02pct	FOXA1	1257	5046	0.249108	175.565	36.542	29.5943	7.15972	9.29e-152	7.12543e-149	DNaseI_Any
TxnFactorChIPV3	HepG2	RCOR1	568	5046	0.112564	41.1738	17.8182	29.5668	13.7952	9.29e-152	7.12543e-149	DNaseI_Any
TxnFactorChIPV3	HepG2	MAX	958	5046	0.189853	104.719	28.8764	29.5494	9.14827	9.29e-152	7.12543e-149	DNaseI_Any
TxnFactorChIPV3	HepG2	SRF	451	5046	0.0893777	27.7073	14.3523	29.4931	16.2773	9.29e-152	7.12543e-149	DNaseI_Any
TxnFactorChIPV3	HeLa-S3	CEBPB	1597	5046	0.316488	281.283	44.7817	29.3807	5.67756	9.29e-152	7.12543e-149	DNaseI_Any
TxnFactorChIPV3	A549+EtOH_0.02pct	EP300	955	5046	0.189259	117.739	28.5494	29.3267	8.11114	9.29e-152	7.12543e-149	DNaseI_Any
TxnFactorChIPV3	A549+DEX_50nM	none	956	5046	0.189457	122.104	28.5034	29.2561	7.8294	9.29e-152	7.12543e-149	DNaseI_Any
TxnFactorChIPV3	A549+DEX_50nM	NR3C1	956	5046	0.189457	122.07	28.5148	29.2456	7.83158	9.29e-152	7.12543e-149	DNaseI_Any
TxnFactorChIPV3	HeLa-S3	CHD2	1048	5046	0.207689	153.609	30.6311	29.1987	6.8225	9.29e-152	7.12543e-149	DNaseI_Any
TxnFactorChIPV3	HepG2	ZBTB33	354	5046	0.0701546	20.4855	11.4289	29.1816	17.2805	9.29e-152	7.12543e-149	DNaseI_Any
TxnFactorChIPV3	HepG2	JUN	579	5046	0.114744	53.5495	18.0271	29.1478	10.8124	9.29e-152	7.12543e-149	DNaseI_Any
TxnFactorChIPV3	A549+DEX_100nM	USF1	714	5046	0.141498	74.9011	21.9464	29.1209	9.53257	9.29e-152	7.12543e-149	DNaseI_Any
H3K4Me1_Broad	HepG2	none	4221	5046	0.836504	1706.92	86.359	29.112	2.47288	9.29e-152	7.12543e-149	DNaseI_Any
TxnFactorChIPV3	HeLa-S3	TBP	970	5046	0.192231	139.454	28.5933	29.0469	6.95572	9.29e-152	7.12543e-149	DNaseI_Any
TxnFactorChIPV3	A549+DEX_100nM	NR3C1	884	5046	0.175188	105.564	26.8144	29.0305	8.37403	9.29e-152	7.12543e-149	DNaseI_Any
TxnFactorChIPV3	A549+DEX_100nM	CREB1	888	5046	0.175981	110.791	26.7886	29.0126	8.01508	9.29e-152	7.12543e-149	DNaseI_Any
TxnFactorChIPV3	A549+EtOH_0.02pct	TAF1	814	5046	0.161316	93.1389	24.8619	28.9946	8.73964	9.29e-152	7.12543e-149	DNaseI_Any
TxnFactorChIPV3	HepG2	SMC3	1006	5046	0.199366	152.432	29.4824	28.9518	6.59968	9.29e-152	7.12543e-149	DNaseI_Any
TxnFactorChIPV3	MCF10A-Er-Src+EtOH_0.01pct	MYC	1286	5046	0.254855	231.79	36.4204	28.9456	5.54812	9.29e-152	7.12543e-149	DNaseI_Any
TxnFactorChIPV3	HepG2+forskolin	POLR2A	1401	5046	0.277646	268.729	39.1198	28.9436	5.21343	9.29e-152	7.12543e-149	DNaseI_Any
TxnFactorChIPV3	HeLa-S3	MAX	1259	5046	0.249505	225.746	35.7074	28.9367	5.57706	9.29e-152	7.12543e-149	DNaseI_Any
TxnFactorChIPV3	HepG2	TAF1	1004	5046	0.198969	150.097	29.5216	28.9247	6.68901	9.29e-152	7.12543e-149	DNaseI_Any
DNaseClusters	A549	none	2435	5046	0.48256	713.026	59.7066	28.8406	3.41502	9.29e-152	7.12543e-149	DNaseI_Any
DNaseClusters	Caco-2	none	2076	5046	0.411415	567.249	52.3391	28.8265	3.65977	9.29e-152	7.12543e-149	DNaseI_Any
H3K4Me3_UW	HepG2	none	1666	5046	0.330163	364.55	45.2175	28.782	4.57001	9.29e-152	7.12543e-149	DNaseI_Any
TxnFactorChIPV3	HepG2	ZBTB7A	614	5046	0.121681	63.9381	19.1256	28.7605	9.60304	9.29e-152	7.12543e-149	DNaseI_Any
TxnFactorChIPV3	HepG2	RFX5	484	5046	0.0959176	41.1628	15.4184	28.7214	11.7582	9.29e-152	7.12543e-149	DNaseI_Any
TxnFactorChIPV3	A549+EtOH_0.02pct	ZBTB33	560	5046	0.110979	54.5744	17.6042	28.7106	10.2612	9.29e-152	7.12543e-149	DNaseI_Any
TxnFactorChIPV3	HeLa-S3	GTF2F1	727	5046	0.144075	89.7672	22.2097	28.6917	8.09872	9.29e-152	7.12543e-149	DNaseI_Any
DNaseClusters	HGF	none	2201	5046	0.436187	607.652	55.5414	28.6875	3.62214	9.29e-152	7.12543e-149	DNaseI_Any
DNaseClusters	LNCaP+androgen	none	2213	5046	0.438565	644.861	54.6678	28.6849	3.43175	9.29e-152	7.12543e-149	DNaseI_Any
DNaseClusters	HConF	none	2159	5046	0.427864	657.235	52.4888	28.6112	3.28498	9.29e-152	7.12543e-149	DNaseI_Any
TxnFactorChIPV3	HepG2	TCF7L2	283	5046	0.056084	15.4116	9.35577	28.6014	18.3628	9.29e-152	7.12543e-149	DNaseI_Any
TxnFactorChIPV3	HepG2	CHD2	458	5046	0.090765	43.1299	14.5312	28.5503	10.6191	9.29e-152	7.12543e-149	DNaseI_Any
TxnFactorChIPV3	HeLa-S3	RFX5	799	5046	0.158343	115.904	23.9765	28.4902	6.89363	9.29e-152	7.12543e-149	DNaseI_Any
TxnFactorChIPV3	A549+DEX_5nM	none	544	5046	0.107808	56.4396	17.1583	28.4155	9.63863	9.29e-152	7.12543e-149	DNaseI_Any
TxnFactorChIPV3	A549+DEX_5nM	NR3C1	544	5046	0.107808	56.4466	17.1761	28.3856	9.63744	9.29e-152	7.12543e-149	DNaseI_Any
TxnFactorChIPV3	K562	CEBPB	1010	5046	0.200159	171.013	29.5685	28.3744	5.90598	9.29e-152	7.12543e-149	DNaseI_Any
TxnFactorChIPV3	T-47D+DMSO_0.02pct	none	1592	5046	0.315497	412.251	41.5884	28.3673	3.86173	9.29e-152	7.12543e-149	DNaseI_Any
TxnFactorChIPV3	HepG2	MYC	462	5046	0.0915577	41.8681	14.8149	28.3587	11.0346	9.29e-152	7.12543e-149	DNaseI_Any
TxnFactorChIPV3	A549+EtOH_0.02pct	USF1	675	5046	0.133769	85.4376	20.817	28.3212	7.90051	9.29e-152	7.12543e-149	DNaseI_Any
TxnFactorChIPV3	HepG2	ATF3	323	5046	0.0640111	22.6304	10.6069	28.3182	14.2729	9.29e-152	7.12543e-149	DNaseI_Any
TFBSConserved	Any	none	3982	5046	0.78914	1835.35	75.8362	28.3064	2.16961	9.29e-152	7.12543e-149	DNaseI_Any
TxnFactorChIPV3	HepG2	MAFF	653	5046	0.129409	84.952	20.0696	28.3039	7.68669	9.29e-152	7.12543e-149	DNaseI_Any
TxnFactorChIPV3	A549+EtOH_0.02pct	ATF3	474	5046	0.0939358	47.4326	15.0723	28.3014	9.99313	9.29e-152	7.12543e-149	DNaseI_Any
DNaseClusters	HVMF	none	2236	5046	0.443123	692.56	54.5456	28.2963	3.2286	9.29e-152	7.12543e-149	DNaseI_Any
TxnFactorChIPV3	HeLa-S3	MXI1	719	5046	0.142489	101.062	21.844	28.2888	7.11445	9.29e-152	7.12543e-149	DNaseI_Any
TxnFactorChIPV3	A549+EtOH_0.02pct	BCL3	548	5046	0.108601	57.6893	17.3352	28.2841	9.49916	9.29e-152	7.12543e-149	DNaseI_Any
DNaseClusters	HMVEC-dLy-Ad	none	1897	5046	0.375941	537.736	48.0948	28.2622	3.52775	9.29e-152	7.12543e-149	DNaseI_Any
DNaseClusters	HPF	none	2213	5046	0.438565	655.949	55.1644	28.2256	3.37374	9.29e-152	7.12543e-149	DNaseI_Any
BroadChromHMM	HepG2	ActivePromoter	1222	5046	0.242172	247.724	34.5515	28.1978	4.9329	9.29e-152	7.12543e-149	DNaseI_Any
TxnFactorChIPV3	MCF10A-Er-Src+4OHTAM_1uM_36hr	E2F4	713	5046	0.1413	108.975	21.4817	28.1181	6.54278	9.29e-152	7.12543e-149	DNaseI_Any
TxnFactorChIPV3	IMR90	CEBPB	1294	5046	0.256441	278.655	36.1109	28.1174	4.64373	9.29e-152	7.12543e-149	DNaseI_Any
TxnFactorChIPV3	MCF10A-Er-Src+4OHTAM_1uM_4hr	MYC	910	5046	0.180341	157.957	26.7727	28.0899	5.76106	9.29e-152	7.12543e-149	DNaseI_Any
DNaseClusters	HCF	none	2293	5046	0.454419	737.149	55.4033	28.0823	3.11063	9.29e-152	7.12543e-149	DNaseI_Any
TxnFactorChIPV3	A549+EtOH_0.02pct	REST	640	5046	0.126833	87.036	19.7081	28.0577	7.35328	9.29e-152	7.12543e-149	DNaseI_Any
TxnFactorChIPV3	A549+EtOH_0.02pct	GABPA	684	5046	0.135553	94.1978	21.0267	28.0502	7.26132	9.29e-152	7.12543e-149	DNaseI_Any
H3K4Me2_Broad	A549	none	3077	5046	0.60979	1219.42	66.283	28.025	2.52333	9.29e-152	7.12543e-149	DNaseI_Any
H3K4Me3_Broad	A549	none	2685	5046	0.532105	983.541	60.7467	28.0091	2.72993	9.29e-152	7.12543e-149	DNaseI_Any
TxnFactorChIPV3	HeLa-S3	TCF7L2	865	5046	0.171423	142.368	25.8131	27.9948	6.07582	9.29e-152	7.12543e-149	DNaseI_Any
TxnFactorChIPV3	A549+EtOH_0.02pct	none	2176	5046	0.431233	708.066	52.5021	27.9595	3.07316	9.29e-152	7.12543e-149	DNaseI_Any
TxnFactorChIPV3	HeLa-S3	TAF1	827	5046	0.163892	140.52	24.5551	27.9567	5.88526	9.29e-152	7.12543e-149	DNaseI_Any
TxnFactorChIPV3	HepG2+forskolin	PPARGC1A	188	5046	0.0372572	9.05395	6.40493	27.9388	20.7644	9.29e-152	7.12543e-149	DNaseI_Any
DNaseClusters	MCF-7	none	2285	5046	0.452834	782.982	53.7761	27.931	2.91833	9.29e-152	7.12543e-149	DNaseI_Any
H3K27Ac_Broad	A549	none	2637	5046	0.522592	992.969	58.9722	27.878	2.65567	9.29e-152	7.12543e-149	DNaseI_Any
TxnFactorChIPV3	HepG2+forskolin	HSF1	184	5046	0.0364645	9.3037	6.26735	27.874	19.7771	9.29e-152	7.12543e-149	DNaseI_Any
DNaseClusters	AG09319	none	1980	5046	0.39239	596.97	49.6605	27.8497	3.31675	9.29e-152	7.12543e-149	DNaseI_Any
TxnFactorChIPV3	A549+EtOH_0.02pct	ETS1	432	5046	0.0856124	46.2208	13.8526	27.8489	9.34645	9.29e-152	7.12543e-149	DNaseI_Any
TxnFactorChIPV3	HeLa-S3	BRCA1	490	5046	0.0971066	54.2098	15.6547	27.8376	9.03896	9.29e-152	7.12543e-149	DNaseI_Any
TxnFactorChIPV3	HeLa-S3	RCOR1	732	5046	0.145065	114.346	22.2115	27.8078	6.40164	9.29e-152	7.12543e-149	DNaseI_Any
DNaseClusters	HMVEC-LLy	none	1971	5046	0.390606	604.923	49.1427	27.7982	3.25827	9.29e-152	7.12543e-149	DNaseI_Any
TxnFactorChIPV3	K562+IFNg6h	IRF1	648	5046	0.128419	97.7632	19.7955	27.796	6.62826	9.29e-152	7.12543e-149	DNaseI_Any
DNaseClusters	HCM	none	2311	5046	0.457987	797.547	54.4749	27.7826	2.89763	9.29e-152	7.12543e-149	DNaseI_Any
TxnFactorChIPV3	HeLa-S3	MYC	669	5046	0.13258	94.1658	20.6905	27.7825	7.10449	9.29e-152	7.12543e-149	DNaseI_Any
DNaseClusters	LNCaP	none	2801	5046	0.555093	1112.44	60.8396	27.7543	2.51789	9.29e-152	7.12543e-149	DNaseI_Any
H3K9Ac_Broad	A549	none	2631	5046	0.521403	979.097	59.5683	27.7312	2.68717	9.29e-152	7.12543e-149	DNaseI_Any
TxnFactorChIPV3	MCF-7+vehicle	MYC	1026	5046	0.203329	213.168	29.3209	27.722	4.81311	9.29e-152	7.12543e-149	DNaseI_Any
TxnFactorChIPV3	T-47D+DMSO_0.02pct	EP300	591	5046	0.117122	81.6234	18.375	27.7212	7.24057	9.29e-152	7.12543e-149	DNaseI_Any
DNaseClusters	HeLa-S3+IFNa4h	none	1704	5046	0.337693	497.685	43.5173	27.7203	3.42385	9.29e-152	7.12543e-149	DNaseI_Any
DNaseClusters	HAEpiC	none	2263	5046	0.448474	806.785	52.5371	27.7178	2.80496	9.29e-152	7.12543e-149	DNaseI_Any
TxnFactorChIPV3	MCF10A-Er-Src+EtOH_0.01pct	STAT3	537	5046	0.106421	69.5465	16.8659	27.7159	7.72146	9.29e-152	7.12543e-149	DNaseI_Any
TxnFactorChIPV3	HepG2	RAD21	1157	5046	0.229291	266.72	32.139	27.7009	4.33788	9.29e-152	7.12543e-149	DNaseI_Any
TxnFactorChIPV3	HepG2	NR2C2	293	5046	0.0580658	22.8182	9.75925	27.6847	12.8406	9.29e-152	7.12543e-149	DNaseI_Any
DNaseClusters	HRE	none	2257	5046	0.447285	766.067	53.8594	27.6819	2.94622	9.29e-152	7.12543e-149	DNaseI_Any
TxnFactorChIPV3	HepG2+insulin	SREBP1	281	5046	0.0556877	20.2388	9.42422	27.6693	13.8842	9.29e-152	7.12543e-149	DNaseI_Any
TxnFactorChIPV3	HepG2+insulin	none	281	5046	0.0556877	20.2607	9.42947	27.6515	13.8692	9.29e-152	7.12543e-149	DNaseI_Any
DNaseClusters	HMVEC-dNeo	none	1903	5046	0.37713	603.93	46.9979	27.641	3.15103	9.29e-152	7.12543e-149	DNaseI_Any
TxnFactorChIPV3	A549+EtOH_0.02pct	ELF1	547	5046	0.108403	68.3686	17.3176	27.6384	8.00075	9.29e-152	7.12543e-149	DNaseI_Any
TxnFactorChIPV3	MCF10A-Er-Src+EtOH_0.01pct	none	1862	5046	0.369005	598.39	45.7323	27.6306	3.11169	9.29e-152	7.12543e-149	DNaseI_Any
DNaseClusters	PANC-1	none	1632	5046	0.323424	487.299	41.4446	27.62	3.34908	9.29e-152	7.12543e-149	DNaseI_Any
TxnFactorChIPV3	A549+DEX_100nM	none	1897	5046	0.375941	595.566	47.1302	27.6136	3.1852	9.29e-152	7.12543e-149	DNaseI_Any
TxnFactorChIPV3	A549	none	2018	5046	0.399921	671.625	48.7844	27.5985	3.00465	9.29e-152	7.12543e-149	DNaseI_Any
DNaseClusters	PrEC	none	2004	5046	0.397146	667.529	48.4564	27.5809	3.00211	9.29e-152	7.12543e-149	DNaseI_Any
DNaseClusters	HeLa-S3	none	2184	5046	0.432818	777.497	51.0408	27.5565	2.80902	9.29e-152	7.12543e-149	DNaseI_Any
DNaseClusters	HCPEpiC	none	2320	5046	0.45977	848.556	53.476	27.5159	2.73406	9.29e-152	7.12543e-149	DNaseI_Any
DNaseClusters	AoAF	none	2127	5046	0.421522	723.821	51.0527	27.4849	2.93857	9.29e-152	7.12543e-149	DNaseI_Any
DNaseClusters	HMVEC-dAd	none	1771	5046	0.350971	544.648	44.6877	27.4427	3.25164	9.29e-152	7.12543e-149	DNaseI_Any
DNaseClusters	AoSMC+serum_free_media	none	2061	5046	0.408442	701.519	49.6149	27.4007	2.93791	9.29e-152	7.12543e-149	DNaseI_Any
H3K79Me2_Broad	HepG2	none	2563	5046	0.507927	1016.21	56.5936	27.3315	2.52211	9.29e-152	7.12543e-149	DNaseI_Any
DNaseClusters	WI-38	none	1995	5046	0.395363	683.865	48.0289	27.2989	2.91724	9.29e-152	7.12543e-149	DNaseI_Any
TxnFactorChIPV3	MCF10A-Er-Src+EtOH_0.01pct	POLR2A	1102	5046	0.218391	265.253	30.673	27.2796	4.15453	9.29e-152	7.12543e-149	DNaseI_Any
TxnFactorChIPV3	HeLa-S3+IFNg30	STAT1	639	5046	0.126635	103.683	19.629	27.2717	6.163	9.29e-152	7.12543e-149	DNaseI_Any
TxnFactorChIPV3	A549	MAX	604	5046	0.119699	91.049	18.8113	27.2682	6.63379	9.29e-152	7.12543e-149	DNaseI_Any
DNaseClusters	HPAF	none	2223	5046	0.440547	787.293	52.6527	27.2675	2.8236	9.29e-152	7.12543e-149	DNaseI_Any
DNaseClusters	HIPEpiC	none	2313	5046	0.458383	885.828	52.3934	27.2395	2.61112	9.29e-152	7.12543e-149	DNaseI_Any
TxnFactorChIPV3	HepG2	USF2	349	5046	0.0691637	34.8492	11.5346	27.2356	10.0146	9.29e-152	7.12543e-149	DNaseI_Any
TxnFactorChIPV3	HeLa-S3	MAZ	708	5046	0.140309	120.523	21.5861	27.2156	5.87437	9.29e-152	7.12543e-149	DNaseI_Any
TxnFactorChIPV3	HeLa-S3+IFNg30	none	639	5046	0.126635	103.476	19.6776	27.2149	6.17537	9.29e-152	7.12543e-149	DNaseI_Any
TxnFactorChIPV3	HepG2+forskolin	ESRRA	157	5046	0.0311138	7.74226	5.49067	27.1839	20.2783	9.29e-152	7.12543e-149	DNaseI_Any
TxnFactorChIPV3	H1-hESC	CEBPB	477	5046	0.0945303	63.6244	15.2148	27.1694	7.49713	9.29e-152	7.12543e-149	DNaseI_Any
TxnFactorChIPV3	K562	ATF1	540	5046	0.107015	76.5834	17.0671	27.1526	7.05113	9.29e-152	7.12543e-149	DNaseI_Any
DNaseClusters	AG04450	none	1868	5046	0.370194	625.779	45.7703	27.1403	2.98508	9.29e-152	7.12543e-149	DNaseI_Any
DNaseClusters	NHDF-neo	none	2090	5046	0.414189	749.631	49.4086	27.1283	2.78804	9.29e-152	7.12543e-149	DNaseI_Any
TxnFactorChIPV3	A549+EtOH_0.02pct	SIN3AK20	460	5046	0.0911613	59.2448	14.7833	27.1086	7.7644	9.29e-152	7.12543e-149	DNaseI_Any
DNaseClusters	SAEC	none	2098	5046	0.415775	775.05	48.81	27.1041	2.70692	9.29e-152	7.12543e-149	DNaseI_Any
TxnFactorChIPV3	HeLa-S3	USF2	497	5046	0.0984939	71.7393	15.6929	27.0989	6.92787	9.29e-152	7.12543e-149	DNaseI_Any
DNaseClusters	HMF	none	2101	5046	0.416369	740.465	50.2105	27.0967	2.83741	9.29e-152	7.12543e-149	DNaseI_Any
TxnFactorChIPV3	A549+EtOH_0.02pct	SIX5	365	5046	0.0723345	37.5455	12.085	27.0959	9.72155	9.29e-152	7.12543e-149	DNaseI_Any
DNaseClusters	HCFaa	none	2010	5046	0.398335	729.583	47.2918	27.0748	2.755	9.29e-152	7.12543e-149	DNaseI_Any
DNaseClusters	AG10803	none	2035	5046	0.40329	709.762	48.962	27.0666	2.86716	9.29e-152	7.12543e-149	DNaseI_Any
TxnFactorChIPV3	T-47D+DMSO_0.02pct	GATA3	805	5046	0.159532	165.307	23.6703	27.0252	4.86974	9.29e-152	7.12543e-149	DNaseI_Any
TxnFactorChIPV3	HeLa-S3	POLR2A	1225	5046	0.242767	326.054	33.2814	27.0105	3.75705	9.29e-152	7.12543e-149	DNaseI_Any
TxnFactorChIPV3	PFSK-1	FOXP2	706	5046	0.139913	126.487	21.4615	27.0024	5.58162	9.29e-152	7.12543e-149	DNaseI_Any
TxnFactorChIPV3	HepG2	MAFK	692	5046	0.137138	124.54	21.0164	27.0008	5.55643	9.29e-152	7.12543e-149	DNaseI_Any
TxnFactorChIPV3	MCF10A-Er-Src+4OHTAM_1uM_36hr	POLR2A	1015	5046	0.201149	249.724	28.3844	26.9612	4.06448	9.29e-152	7.12543e-149	DNaseI_Any
TxnFactorChIPV3	A549+EtOH_0.02pct	FOSL2	803	5046	0.159136	160.194	23.8461	26.9564	5.01268	9.29e-152	7.12543e-149	DNaseI_Any
TxnFactorChIPV3	MCF10A-Er-Src+EtOH_0.01pct_4hr	STAT3	957	5046	0.189655	225.472	27.1706	26.9235	4.24444	9.29e-152	7.12543e-149	DNaseI_Any
TxnFactorChIPV3	SK-N-MC	FOXP2	558	5046	0.110583	88.8422	17.4278	26.92	6.2808	9.29e-152	7.12543e-149	DNaseI_Any
TxnFactorChIPV3	MCF10A-Er-Src+EtOH_0.01pct_4hr	none	957	5046	0.189655	225.542	27.1832	26.9084	4.2431	9.29e-152	7.12543e-149	DNaseI_Any
TxnFactorChIPV3	HeLa-S3	STAT3	516	5046	0.102259	79.3636	16.2424	26.8825	6.50172	9.29e-152	7.12543e-149	DNaseI_Any
TxnFactorChIPV3	PANC-1	none	983	5046	0.194808	251.148	27.2298	26.8769	3.91403	9.29e-152	7.12543e-149	DNaseI_Any
TxnFactorChIPV3	K562	TBP	700	5046	0.138724	130.874	21.1853	26.8642	5.34865	9.29e-152	7.12543e-149	DNaseI_Any
TxnFactorChIPV3	MCF10A-Er-Src+4OHTAM_1uM_36hr	STAT3	957	5046	0.189655	220.529	27.4383	26.841	4.33956	9.29e-152	7.12543e-149	DNaseI_Any
TxnFactorChIPV3	K562	SP1	412	5046	0.0816488	52.4116	13.4043	26.8263	7.86086	9.29e-152	7.12543e-149	DNaseI_Any
TxnFactorChIPV3	HeLa-S3	ELK1	351	5046	0.06956	39.2917	11.6202	26.8247	8.93318	9.29e-152	7.12543e-149	DNaseI_Any
TxnFactorChIPV3	K562	E2F4	472	5046	0.0935394	66.96	15.1316	26.7678	7.04898	9.29e-152	7.12543e-149	DNaseI_Any
DNaseClusters	NHDF-Ad	none	2210	5046	0.437971	890.197	49.3597	26.7385	2.4826	9.29e-152	7.12543e-149	DNaseI_Any
TxnFactorChIPV3	HepG2	GABPA	529	5046	0.104836	83.3826	16.6712	26.7298	6.34425	9.29e-152	7.12543e-149	DNaseI_Any
TxnFactorChIPV3	HeLa-S3	NFYA	364	5046	0.0721363	42.5195	12.032	26.7187	8.56078	9.29e-152	7.12543e-149	DNaseI_Any
TxnFactorChIPV3	MCF10A-Er-Src+4OHTAM_1uM_36hr	none	1737	5046	0.344233	610.293	42.2516	26.6666	2.84618	9.29e-152	7.12543e-149	DNaseI_Any
DNaseClusters	HCT-116	none	1500	5046	0.297265	479.769	38.2609	26.6651	3.1265	9.29e-152	7.12543e-149	DNaseI_Any
DNaseClusters	HL-60	none	1755	5046	0.3478	619.914	42.5778	26.6591	2.83104	9.29e-152	7.12543e-149	DNaseI_Any
H3K27Ac_Broad	HeLa-S3	none	2068	5046	0.40983	796.649	47.6908	26.6582	2.59587	9.29e-152	7.12543e-149	DNaseI_Any
TxnFactorChIPV3	MCF-7	E2F1	770	5046	0.152596	162.473	22.8031	26.6423	4.73926	9.29e-152	7.12543e-149	DNaseI_Any
DNaseClusters	RWPE1	none	1827	5046	0.362069	659.373	43.8526	26.6262	2.77082	9.29e-152	7.12543e-149	DNaseI_Any
DNaseClusters	HPdLF	none	1972	5046	0.390805	696.619	47.9041	26.6236	2.83081	9.29e-152	7.12543e-149	DNaseI_Any
DNaseClusters	Ishikawa+Estradiol_100nM_1hr	none	1733	5046	0.34344	587.876	43.0234	26.6163	2.9479	9.29e-152	7.12543e-149	DNaseI_Any
DNaseClusters	Ishikawa+4OHTAM_100nM_30m	none	1751	5046	0.347008	606.358	43.0311	26.6004	2.88773	9.29e-152	7.12543e-149	DNaseI_Any
DNaseClusters	BJ	none	1849	5046	0.366429	667.018	44.4519	26.5902	2.77204	9.29e-152	7.12543e-149	DNaseI_Any
TxnFactorChIPV3	K562	MYC	873	5046	0.173008	200.6	25.2918	26.5857	4.35194	9.29e-152	7.12543e-149	DNaseI_Any
DNaseClusters	HPDE6-E6E7	none	1720	5046	0.340864	602.734	42.0874	26.5463	2.85366	9.29e-152	7.12543e-149	DNaseI_Any
TxnFactorChIPV3	K562	ATF3	562	5046	0.111375	92.3187	17.6962	26.5414	6.08761	9.29e-152	7.12543e-149	DNaseI_Any
TxnFactorChIPV3	SK-N-SH	TAF1	672	5046	0.133175	130.307	20.4224	26.5245	5.15706	9.29e-152	7.12543e-149	DNaseI_Any
TxnFactorChIPV3	PANC-1	TCF7L2	561	5046	0.111177	98.1638	17.4587	26.5103	5.71494	9.29e-152	7.12543e-149	DNaseI_Any
DNaseClusters	AG09309	none	2091	5046	0.414388	812.247	48.2366	26.51	2.57434	9.29e-152	7.12543e-149	DNaseI_Any
DNaseClusters	HMVEC-dLy-Neo	none	1848	5046	0.366231	650.673	45.1881	26.4965	2.84013	9.29e-152	7.12543e-149	DNaseI_Any
TxnFactorChIPV3	A549+DEX_100nM	POLR2A	1146	5046	0.227111	313.517	31.422	26.4936	3.6553	9.29e-152	7.12543e-149	DNaseI_Any
TxnFactorChIPV3	HCT-116	TCF7L2	726	5046	0.143876	146.12	21.9103	26.4661	4.96852	9.29e-152	7.12543e-149	DNaseI_Any
DNaseClusters	HAc	none	1924	5046	0.381292	739.963	44.7443	26.4623	2.60013	9.29e-152	7.12543e-149	DNaseI_Any
H3K4Me3_UW	A549	none	1279	5046	0.253468	370.623	34.3399	26.4525	3.45094	9.29e-152	7.12543e-149	DNaseI_Any
TxnFactorChIPV3	HCT-116	POLR2A	1160	5046	0.229885	330.774	31.3502	26.4504	3.50692	9.29e-152	7.12543e-149	DNaseI_Any
DNaseClusters	HPAEC	none	1622	5046	0.321443	530.849	41.2869	26.4285	3.05548	9.29e-152	7.12543e-149	DNaseI_Any
TxnFactorChIPV3	K562+IFNg30	MYC	914	5046	0.181134	230.814	25.87	26.4084	3.9599	9.29e-152	7.12543e-149	DNaseI_Any
TxnFactorChIPV3	K562	BHLHE40	691	5046	0.13694	139.021	20.9103	26.3975	4.97047	9.29e-152	7.12543e-149	DNaseI_Any
TxnFactorChIPV3	K562	TAF1	681	5046	0.134958	134.513	20.7034	26.396	5.06269	9.29e-152	7.12543e-149	DNaseI_Any
TxnFactorChIPV3	K562+IFNg6h	MYC	728	5046	0.144273	155.501	21.7087	26.3718	4.68163	9.29e-152	7.12543e-149	DNaseI_Any
TxnFactorChIPV3	HeLa-S3	EP300	722	5046	0.143084	143.433	21.9467	26.3624	5.03372	9.29e-152	7.12543e-149	DNaseI_Any
TxnFactorChIPV3	HeLa-S3	NFYB	365	5046	0.0723345	45.4426	12.1231	26.3594	8.03212	9.29e-152	7.12543e-149	DNaseI_Any
DNaseClusters	Monocytes-CD14+_RO01746	none	1646	5046	0.326199	564.074	41.0482	26.3574	2.91806	9.29e-152	7.12543e-149	DNaseI_Any
TxnFactorChIPV3	A549+EtOH_0.02pct	POLR2A	1136	5046	0.225129	312.373	31.2539	26.3528	3.63668	9.29e-152	7.12543e-149	DNaseI_Any
TxnFactorChIPV3	NB4	MYC	860	5046	0.170432	197.287	25.1543	26.3459	4.35914	9.29e-152	7.12543e-149	DNaseI_Any
DNaseClusters	HEEpiC	none	2074	5046	0.411019	813.751	47.8775	26.3223	2.54869	9.29e-152	7.12543e-149	DNaseI_Any
TxnFactorChIPV3	K562	JUND	1012	5046	0.200555	260.332	28.5677	26.3119	3.88735	9.29e-152	7.12543e-149	DNaseI_Any
DNaseClusters	MCF-7+Hypoxia_LacAcid	none	1765	5046	0.349782	660.639	41.9997	26.2945	2.67165	9.29e-152	7.12543e-149	DNaseI_Any
TxnFactorChIPV3	SK-N-SH	SIN3AK20	656	5046	0.130004	132.71	19.9014	26.2941	4.9431	9.29e-152	7.12543e-149	DNaseI_Any
TxnFactorChIPV3	MCF10A-Er-Src+EtOH_0.01pct_12hr	STAT3	869	5046	0.172216	207.582	25.1632	26.2851	4.18629	9.29e-152	7.12543e-149	DNaseI_Any
DNaseClusters	HBMEC	none	2005	5046	0.397344	806.664	45.6013	26.2786	2.48554	9.29e-152	7.12543e-149	DNaseI_Any
TxnFactorChIPV3	HeLa-S3	TFAP2C	801	5046	0.15874	176.536	23.7676	26.2737	4.53731	9.29e-152	7.12543e-149	DNaseI_Any
DNaseClusters	HFF	none	2014	5046	0.399128	804.01	46.1005	26.2468	2.50494	9.29e-152	7.12543e-149	DNaseI_Any
DNaseClusters	HMVEC-dBl-Ad	none	1813	5046	0.359294	677.454	43.2986	26.226	2.6762	9.29e-152	7.12543e-149	DNaseI_Any
TxnFactorChIPV3	A549	BHLHE40	247	5046	0.0489497	23.1868	8.53663	26.218	10.6526	9.29e-152	7.12543e-149	DNaseI_Any
TxnFactorChIPV3	PFSK-1	none	899	5046	0.178161	220.568	25.8815	26.213	4.07583	9.4e-152	7.2098e-149	DNaseI_Any
TxnFactorChIPV3	MCF10A-Er-Src+4OHTAM_1uM_12hr	STAT3	840	5046	0.166468	201.113	24.3732	26.2127	4.17676	9.51e-152	7.29417e-149	DNaseI_Any
TxnFactorChIPV3	MCF10A-Er-Src+EtOH_0.01pct_12hr	none	869	5046	0.172216	207.761	25.2364	26.2018	4.18269	1.26e-151	9.6642e-149	DNaseI_Any
DNaseClusters	HA-h	none	1990	5046	0.394372	816.73	44.7785	26.2016	2.43654	1.26e-151	9.6642e-149	DNaseI_Any
TxnFactorChIPV3	IMR90	none	1905	5046	0.377527	745.441	44.2722	26.1916	2.55554	1.64e-151	1.25788e-148	DNaseI_Any
H3K27Ac_SYDH	PANC-1	none	1734	5046	0.343639	643.347	41.6428	26.1907	2.69528	1.69e-151	1.29623e-148	DNaseI_Any
DNaseClusters	T-47D	none	1784	5046	0.353547	649.148	43.356	26.1752	2.74822	2.52e-151	1.93284e-148	DNaseI_Any
TxnFactorChIPV3	PBDE	POLR2A	834	5046	0.165279	199.654	24.2387	26.1708	4.17722	2.82e-151	2.16294e-148	DNaseI_Any
TxnFactorChIPV3	PBDE	none	1004	5046	0.198969	278.249	27.7469	26.1561	3.60828	4.17e-151	3.19839e-148	DNaseI_Any
TxnFactorChIPV3	U87	POLR2A	988	5046	0.195799	261.12	27.8062	26.141	3.7837	6.21e-151	4.76307e-148	DNaseI_Any
TxnFactorChIPV3	MCF10A-Er-Src+4OHTAM_1uM_4hr	none	1355	5046	0.26853	446.596	34.7697	26.1263	3.03406	9.14e-151	7.01038e-148	DNaseI_Any
TxnFactorChIPV3	GM12878	TBP	590	5046	0.116924	110.984	18.3393	26.1196	5.31608	1.09e-150	8.3603e-148	DNaseI_Any
DNaseClusters	PanIslets	none	2003	5046	0.396948	789.745	46.4517	26.1186	2.53626	1.11e-150	8.5137e-148	DNaseI_Any
TxnFactorChIPV3	H1-hESC	TAF1	743	5046	0.147245	172.467	21.8548	26.1057	4.30808	1.56e-150	1.19652e-147	DNaseI_Any
TxnFactorChIPV3	PANC-1	POLR2A	648	5046	0.128419	138.553	19.5192	26.0998	4.6769	1.82e-150	1.39594e-147	DNaseI_Any
H3K4Me1_Broad	A549	none	3272	5046	0.648434	1747.17	58.453	26.0864	1.87274	2.58e-150	1.97886e-147	DNaseI_Any
TxnFactorChIPV3	MCF-7+serum_stimulated_media	MYC	767	5046	0.152002	171.401	22.8331	26.085	4.4749	2.69e-150	2.06323e-147	DNaseI_Any
TxnFactorChIPV3	NB4	MAX	919	5046	0.182124	232.746	26.3138	26.0797	3.94851	3.08e-150	2.36236e-147	DNaseI_Any
TxnFactorChIPV3	HeLa-S3	none	2312	5046	0.458185	1005.45	50.137	26.0595	2.29946	5.24e-150	4.01908e-147	DNaseI_Any
DNaseClusters	HRGEC	none	1648	5046	0.326595	571.934	41.3185	26.0432	2.88145	8.04e-150	6.16668e-147	DNaseI_Any
DNaseClusters	AG04449	none	1802	5046	0.357115	677.865	43.2518	25.9905	2.65835	3.15e-149	2.41605e-146	DNaseI_Any
DNaseClusters	HMVEC-LBl	none	1840	5046	0.364645	705.417	43.6716	25.9799	2.60839	4.17e-149	3.19839e-146	DNaseI_Any
TxnFactorChIPV3	H1-hESC	TBP	655	5046	0.129806	137.236	19.9317	25.9769	4.77281	4.48e-149	3.43616e-146	DNaseI_Any
TxnFactorChIPV3	K562	MAX	1126	5046	0.223147	328.602	30.7085	25.9666	3.42663	5.87e-149	4.50229e-146	DNaseI_Any
TxnFactorChIPV3	HCT-116	YY1	560	5046	0.110979	101.135	17.6916	25.9369	5.53716	1.27e-148	9.7409e-146	DNaseI_Any
TxnFactorChIPV3	MCF-7+estrogen	MYC	466	5046	0.0923504	77.6963	14.9775	25.9258	5.99771	1.69e-148	1.29623e-145	DNaseI_Any
TxnFactorChIPV3	A549+EtOH_0.02pct	YY1	515	5046	0.102061	87.009	16.5091	25.9245	5.91893	1.75e-148	1.34225e-145	DNaseI_Any
TxnFactorChIPV3	U87	none	1051	5046	0.208284	297.746	29.0665	25.9149	3.52985	2.24e-148	1.71808e-145	DNaseI_Any
TxnFactorChIPV3	GM12878	CHD2	602	5046	0.119302	117.443	18.6992	25.9132	5.12591	2.34e-148	1.79478e-145	DNaseI_Any
DNaseClusters	HTR8svn	none	1583	5046	0.313714	570.437	39.1072	25.892	2.77507	4.1e-148	3.1447e-145	DNaseI_Any
TxnFactorChIPV3	K562	MAZ	915	5046	0.181332	244.364	25.9086	25.8847	3.74442	4.94e-148	3.78898e-145	DNaseI_Any
TxnFactorChIPV3	K562	CHD2	386	5046	0.0764962	58.1209	12.686	25.8458	6.64133	1.35e-147	1.03545e-144	DNaseI_Any
H3K4Me2_Broad	HeLa-S3	none	2486	5046	0.492667	1131.6	52.4144	25.8403	2.1969	1.56e-147	1.19652e-144	DNaseI_Any
TxnFactorChIPV3	K562	KDM5B	610	5046	0.120888	122.772	18.8639	25.8285	4.96855	2.1e-147	1.6107e-144	DNaseI_Any
DNaseClusters	HMVEC-dBl-Neo	none	1838	5046	0.364249	701.044	44.0976	25.7827	2.6218	6.92e-147	5.30764e-144	DNaseI_Any
DNaseClusters	WI-38+4OHTAM_20nM_72hr	none	1938	5046	0.384067	804.295	43.9724	25.7822	2.40956	6.98e-147	5.35366e-144	DNaseI_Any
DNaseClusters	HFF-Myc	none	1983	5046	0.392985	842.45	44.2527	25.7736	2.35385	8.77e-147	6.72659e-144	DNaseI_Any
TxnFactorChIPV3	H1-hESC	SP1	536	5046	0.106223	97.5524	17.0137	25.7703	5.49448	9.53e-147	7.30951e-144	DNaseI_Any
H3K4Me3_UW	Caco-2	none	1076	5046	0.213238	311.617	29.6618	25.77	3.45295	9.62e-147	7.37854e-144	DNaseI_Any
DNaseClusters	FibroP	none	2224	5046	0.440745	1009.85	47.1219	25.7662	2.20231	1.06e-146	8.1302e-144	DNaseI_Any
TxnFactorChIPV3	GM12878	SIX5	297	5046	0.0588585	34.8961	10.1767	25.7553	8.51098	1.4e-146	1.0738e-143	DNaseI_Any
TxnFactorChIPV3	HUVEC	POLR2A	1217	5046	0.241181	393.036	32.009	25.7416	3.09641	1.98e-146	1.51866e-143	DNaseI_Any
H2A.Z_Broad	HepG2	none	3282	5046	0.650416	1727.27	60.4168	25.7334	1.90011	2.46e-146	1.88682e-143	DNaseI_Any
DNaseClusters	HSMM	none	2500	5046	0.495442	1205.98	50.2926	25.7299	2.07301	2.7e-146	2.0709e-143	DNaseI_Any
DNaseClusters	HNPCEpiC	none	2005	5046	0.397344	845.131	45.1614	25.6828	2.37241	9.1e-146	6.9797e-143	DNaseI_Any
TxnFactorChIPV3	K562	EP300	691	5046	0.13694	149.158	21.1073	25.6709	4.63268	1.22e-145	9.3574e-143	DNaseI_Any
TxnFactorChIPV3	K562	NRF1	265	5046	0.0525168	30.5924	9.13705	25.6546	8.66228	1.87e-145	1.43429e-142	DNaseI_Any
TxnFactorChIPV3	K562	TBL1XR1	446	5046	0.0883868	71.5135	14.6028	25.6448	6.23659	2.39e-145	1.83313e-142	DNaseI_Any
TxnFactorChIPV3	K562+IFNa6h	MYC	496	5046	0.0982957	92.4366	15.7386	25.6416	5.36584	2.62e-145	2.00954e-142	DNaseI_Any
TxnFactorChIPV3	GM12878	RFX5	271	5046	0.0537059	31.3536	9.35333	25.6215	8.64333	4.39e-145	3.36713e-142	DNaseI_Any
TxnFactorChIPV3	ECC-1+DMSO_0.02pct	FOXA1	273	5046	0.0541023	31.1469	9.44391	25.6094	8.76493	5.96e-145	4.57132e-142	DNaseI_Any
TxnFactorChIPV3	GM12878	SP1	613	5046	0.121482	123.031	19.1504	25.5854	4.98249	1.1e-144	8.437e-142	DNaseI_Any
TxnFactorChIPV3	HeLa-S3	ELK4	371	5046	0.0735236	49.3277	12.573	25.5844	7.52113	1.14e-144	8.7438e-142	DNaseI_Any
TxnFactorChIPV3	K562+IFNg30	none	1141	5046	0.22612	363.948	30.3852	25.5734	3.13506	1.5e-144	1.1505e-141	DNaseI_Any
TxnFactorChIPV3	H1-hESC	CHD2	370	5046	0.0733254	53.2777	12.3925	25.5575	6.94474	2.26e-144	1.73342e-141	DNaseI_Any
TxnFactorChIPV3	GM12878	MXI1	653	5046	0.129409	143.068	19.9712	25.5334	4.56427	4.18e-144	3.20606e-141	DNaseI_Any
H3K4Me3_Broad	HeLa-S3	none	2161	5046	0.42826	953.626	47.2868	25.533	2.26609	4.22e-144	3.23674e-141	DNaseI_Any
TxnFactorChIPV3	K562	RCOR1	782	5046	0.154974	199.458	22.8249	25.5222	3.92063	5.56e-144	4.26452e-141	DNaseI_Any
TxnFactorChIPV3	K562	GABPA	523	5046	0.103646	104.658	16.395	25.5164	4.99721	6.49e-144	4.97783e-141	DNaseI_Any
DNaseClusters	NH-A	none	1929	5046	0.382283	780.974	45.0045	25.5091	2.46999	7.8e-144	5.9826e-141	DNaseI_Any
H3K27Ac_SYDH	MCF-7	none	878	5046	0.173999	229.395	25.4396	25.4959	3.82747	1.09e-143	8.3603e-141	DNaseI_Any
TxnFactorChIPV3	K562	CCNT2	654	5046	0.129608	146.796	19.9137	25.4701	4.45516	2.1e-143	1.6107e-140	DNaseI_Any
DNaseClusters	NB4	none	1588	5046	0.314705	597.145	38.9096	25.4656	2.65932	2.37e-143	1.81779e-140	DNaseI_Any
TxnFactorChIPV3	K562	ELF1	740	5046	0.146651	177.126	22.109	25.4591	4.17782	2.79e-143	2.13993e-140	DNaseI_Any
TxnFactorChIPV3	K562	YY1	706	5046	0.139913	173.243	20.9281	25.4565	4.07521	2.96e-143	2.27032e-140	DNaseI_Any
TxnFactorChIPV3	K562	SIN3AK20	552	5046	0.109394	109.59	17.3792	25.4563	5.03694	3e-143	2.301e-140	DNaseI_Any
BroadChromHMM	NHLF	none	2576	5046	0.510503	1281.61	50.8809	25.4397	2.00998	4.55e-143	3.48985e-140	DNaseI_Any
TxnFactorChIPV3	K562+IFNa30	none	928	5046	0.183908	258.877	26.3817	25.3631	3.58471	3.21e-142	2.46207e-139	DNaseI_Any
DNaseClusters	HA-sp	none	1808	5046	0.358304	735.379	42.2955	25.3601	2.4586	3.45e-142	2.64615e-139	DNaseI_Any
TxnFactorChIPV3	MCF-7+serum_starved_media	POLR2A	877	5046	0.173801	244.709	24.9354	25.3571	3.58384	3.74e-142	2.86858e-139	DNaseI_Any
DNaseClusters	Stellate	none	1821	5046	0.36088	740.185	42.6406	25.3471	2.4602	4.82e-142	3.69694e-139	DNaseI_Any
TxnFactorChIPV3	K562+IFNg6h	none	1061	5046	0.210266	319.253	29.2679	25.3434	3.32339	5.28e-142	4.04976e-139	DNaseI_Any
H3K27Ac_Broad	HMEC	none	2001	5046	0.396552	901.861	43.3905	25.3314	2.21875	7.16e-142	5.49172e-139	DNaseI_Any
TxnFactorChIPV3	K562+IFNa6h	none	941	5046	0.186484	262.514	26.7947	25.3216	3.58456	9.14e-142	7.01038e-139	DNaseI_Any
TxnFactorChIPV3	K562	ETS1	477	5046	0.0945303	83.2338	15.553	25.3176	5.73085	1.01e-141	7.7467e-139	DNaseI_Any
TxnFactorChIPV3	GM12878	NRF1	324	5046	0.0642093	41.8961	11.1427	25.3174	7.73342	1.02e-141	7.8234e-139	DNaseI_Any
TxnFactorChIPV3	MCF10A-Er-Src+4OHTAM_1uM_12hr	none	1290	5046	0.255648	463.039	32.6703	25.3124	2.78594	1.17e-141	8.9739e-139	DNaseI_Any
DNaseClusters	NHLF	none	1955	5046	0.387436	828.072	44.5377	25.3028	2.36091	1.49e-141	1.14283e-138	DNaseI_Any
TxnFactorChIPV3	HeLa-S3	TFAP2A	621	5046	0.123068	135.348	19.2022	25.2915	4.58818	1.98e-141	1.51866e-138	DNaseI_Any
TxnFactorChIPV3	HeLa-S3	GABPA	380	5046	0.0753072	58.025	12.7341	25.2844	6.5489	2.37e-141	1.81779e-138	DNaseI_Any
TxnFactorChIPV3	IMR90	POLR2A	845	5046	0.167459	225.983	24.5015	25.2644	3.73922	3.89e-141	2.98363e-138	DNaseI_Any
TxnFactorChIPV3	K562	PHF8	702	5046	0.13912	170.226	21.0831	25.2228	4.12393	1.13e-140	8.6671e-138	DNaseI_Any
H3K9Ac_Broad	HMEC	none	1928	5046	0.382085	839.463	43.1681	25.2162	2.29671	1.32e-140	1.01244e-137	DNaseI_Any
TxnFactorChIPV3	U2OS	KAP1	524	5046	0.103845	101.304	16.7743	25.1991	5.17257	2.04e-140	1.56468e-137	DNaseI_Any
TxnFactorChIPV3	ProgFib	POLR2A	827	5046	0.163892	229.704	23.7105	25.1912	3.60028	2.5e-140	1.9175e-137	DNaseI_Any
TxnFactorChIPV3	GM12891	TAF1	558	5046	0.110583	110.53	17.7681	25.1839	5.04838	3e-140	2.301e-137	DNaseI_Any
TxnFactorChIPV3	K562	PML	563	5046	0.111574	116.386	17.7356	25.1818	4.83737	3.16e-140	2.42372e-137	DNaseI_Any
TxnFactorChIPV3	K562+IFNa6h	POLR2A	750	5046	0.148633	191.648	22.1754	25.1788	3.91342	3.39e-140	2.60013e-137	DNaseI_Any
TxnFactorChIPV3	NB4	POLR2A	833	5046	0.165081	226.447	24.1024	25.1657	3.67857	4.72e-140	3.62024e-137	DNaseI_Any
TxnFactorChIPV3	HeLa-S3	NRF1	208	5046	0.0412208	21.3457	7.42014	25.1551	9.74437	6.19e-140	4.74773e-137	DNaseI_Any
H3K4Me3_Broad	Osteoblasts	none	2192	5046	0.434403	1028.61	46.267	25.1452	2.13104	7.89e-140	6.05163e-137	DNaseI_Any
TxnFactorChIPV3	MCF-7+serum_stimulated_media	POLR2A	885	5046	0.175386	254.647	25.0743	25.1394	3.47539	9.18e-140	7.04106e-137	DNaseI_Any
TxnFactorChIPV3	SK-N-MC	none	913	5046	0.180935	275.733	25.3495	25.1392	3.31117	9.18e-140	7.04106e-137	DNaseI_Any
H3K27Ac_SYDH	HCT-116	none	1054	5046	0.208878	323.365	29.0679	25.1355	3.25948	1.02e-139	7.8234e-137	DNaseI_Any
TxnFactorChIPV3	K562	SRF	235	5046	0.0465715	26.961	8.28236	25.1183	8.71628	1.57e-139	1.20419e-136	DNaseI_Any
H3K4Me1_Broad	HeLa-S3	none	2541	5046	0.503567	1276.63	50.3525	25.1104	1.9904	1.91e-139	1.46497e-136	DNaseI_Any
TxnFactorChIPV3	GM12878	PML	596	5046	0.118113	132.009	18.4806	25.107	4.51484	2.07e-139	1.58769e-136	DNaseI_Any
H3K4Me3_Broad	NHLF	none	1921	5046	0.380698	858.855	42.3104	25.1036	2.2367	2.25e-139	1.72575e-136	DNaseI_Any
TxnFactorChIPV3	K562	MXI1	356	5046	0.0705509	56.958	11.9136	25.1009	6.25021	2.42e-139	1.85614e-136	DNaseI_Any
TxnFactorChIPV3	GM12878	TAF1	610	5046	0.120888	129.994	19.1344	25.086	4.69252	3.53e-139	2.70751e-136	DNaseI_Any
TxnFactorChIPV3	K562+IFNg30	POLR2A	814	5046	0.161316	219.938	23.6837	25.0832	3.70104	3.79e-139	2.90693e-136	DNaseI_Any
TxnFactorChIPV3	SK-N-SH_RA	USF1	524	5046	0.103845	111.391	16.4634	25.0622	4.70417	6.4e-139	4.9088e-136	DNaseI_Any
TxnFactorChIPV3	SK-N-SH_RA	YY1	556	5046	0.110186	120.123	17.3965	25.0555	4.62859	7.59e-139	5.82153e-136	DNaseI_Any
TxnFactorChIPV3	K562+IFNg30	IRF1	423	5046	0.0838288	73.3317	13.9579	25.0516	5.76831	8.39e-139	6.43513e-136	DNaseI_Any
TxnFactorChIPV3	HepG2	NRF1	163	5046	0.0323028	14.027	5.94914	25.0411	11.6205	1.09e-138	8.3603e-136	DNaseI_Any
TxnFactorChIPV3	K562	POLR2A	1120	5046	0.221958	359.979	30.3601	25.0335	3.11129	1.32e-138	1.01244e-135	DNaseI_Any
DNaseClusters	Gliobla	none	1701	5046	0.337099	729.45	38.8227	25.0253	2.3319	1.61e-138	1.23487e-135	DNaseI_Any
TxnFactorChIPV3	A549	POLR2A	905	5046	0.17935	258	25.8542	25.025	3.50775	1.63e-138	1.25021e-135	DNaseI_Any
TxnFactorChIPV3	U87	REST	465	5046	0.0921522	89.4326	15.0194	25.0054	5.19945	2.65e-138	2.03255e-135	DNaseI_Any
TxnFactorChIPV3	K562	SIX5	250	5046	0.0495442	29.3506	8.85968	24.9049	8.5177	3.27e-137	2.50809e-134	DNaseI_Any
TxnFactorChIPV3	SK-N-SH	POLR2A	966	5046	0.191439	296.502	26.8874	24.9	3.25798	3.68e-137	2.82256e-134	DNaseI_Any
TxnFactorChIPV3	GM18951	none	891	5046	0.176576	267.346	25.0573	24.8891	3.33276	4.88e-137	3.74296e-134	DNaseI_Any
DNaseClusters	HSMM_emb	none	1535	5046	0.304201	598.594	37.6231	24.8891	2.56434	4.88e-137	3.74296e-134	DNaseI_Any
TxnFactorChIPV3	GM12878	SIN3A	497	5046	0.0984939	98.028	16.0303	24.8886	5.06998	4.92e-137	3.77364e-134	DNaseI_Any
TxnFactorChIPV3	A549+DEX_100nM	FOXA1	267	5046	0.0529132	33.7173	9.37331	24.888	7.91879	5.01e-137	3.84267e-134	DNaseI_Any
TxnFactorChIPV3	SK-N-SH	none	1161	5046	0.230083	401.69	30.5099	24.8873	2.89029	5.07e-137	3.88869e-134	DNaseI_Any
H3K27Ac_Broad	NHLF	none	2066	5046	0.409433	975.152	43.8704	24.8653	2.11864	8.77e-137	6.72659e-134	DNaseI_Any
TxnFactorChIPV3	MCF-7	POLR2A	796	5046	0.157749	219.994	23.1732	24.8566	3.61828	1.09e-136	8.3603e-134	DNaseI_Any
H3K4Me2_Broad	NHLF	none	2445	5046	0.484542	1220.75	49.2848	24.8403	2.00287	1.64e-136	1.25788e-133	DNaseI_Any
DNaseClusters	SK-N-SH_RA	none	1172	5046	0.232263	405.221	30.8807	24.8303	2.89225	2.1e-136	1.6107e-133	DNaseI_Any
TxnFactorChIPV3	K562	HMGN3	556	5046	0.110186	122.061	17.4774	24.8286	4.5551	2.19e-136	1.67973e-133	DNaseI_Any
TxnFactorChIPV3	GM12878	MAX	537	5046	0.106421	114.594	17.013	24.8284	4.68609	2.19e-136	1.67973e-133	DNaseI_Any
TxnFactorChIPV3	HeLa-S3	MAFK	362	5046	0.07174	59.4176	12.1871	24.8281	6.09247	2.21e-136	1.69507e-133	DNaseI_Any
TxnFactorChIPV3	Gliobla	POLR2A	857	5046	0.169837	240.063	24.8517	24.8248	3.5699	2.42e-136	1.85614e-133	DNaseI_Any
TxnFactorChIPV3	GM19099	POLR2A	895	5046	0.177368	269.707	25.194	24.8191	3.31841	2.78e-136	2.13226e-133	DNaseI_Any
TxnFactorChIPV3	HCT-116	ZBTB33	262	5046	0.0519223	33.6913	9.20498	24.8027	7.77649	4.18e-136	3.20606e-133	DNaseI_Any
TxnFactorChIPV3	GM19099	none	895	5046	0.177368	269.963	25.2049	24.7983	3.31527	4.67e-136	3.58189e-133	DNaseI_Any
TxnFactorChIPV3	HUVEC	MAX	425	5046	0.0842251	76.6314	14.0611	24.7753	5.54603	8.22e-136	6.30474e-133	DNaseI_Any
TxnFactorChIPV3	K562+IFNa30	POLR2A	751	5046	0.148831	195.956	22.4125	24.765	3.83249	1.06e-135	8.1302e-133	DNaseI_Any
DNaseClusters	Urothelia	none	1542	5046	0.305589	641.248	36.4244	24.7293	2.40469	2.57e-135	1.97119e-132	DNaseI_Any
TxnFactorChIPV3	GM18951	POLR2A	891	5046	0.176576	267.355	25.2337	24.7148	3.33265	3.71e-135	2.84557e-132	DNaseI_Any
H3K9Ac_SYDH	K562	none	1221	5046	0.241974	430.321	31.9991	24.7094	2.83742	4.22e-135	3.23674e-132	DNaseI_Any
TxnFactorChIPV3	HeLa-S3	NR2C2	172	5046	0.0340864	15.0939	6.35147	24.7039	11.3953	4.84e-135	3.71228e-132	DNaseI_Any
TxnFactorChIPV3	GM12892	TAF1	478	5046	0.0947285	93.972	15.5491	24.6978	5.08662	5.62e-135	4.31054e-132	DNaseI_Any
TxnFactorChIPV3	HeLa-S3	JUND	672	5046	0.133175	169.481	20.3576	24.6846	3.96506	7.78e-135	5.96726e-132	DNaseI_Any
H3K9Ac_Broad	NHEK	none	1955	5046	0.387436	893.746	43.0668	24.642	2.18742	2.22e-134	1.70274e-131	DNaseI_Any
TxnFactorChIPV3	GM12878	ELF1	686	5046	0.135949	165.583	21.1257	24.6343	4.14293	2.7e-134	2.0709e-131	DNaseI_Any
DNaseClusters	BE2_C	none	1608	5046	0.318668	655.749	38.6723	24.6236	2.45216	3.49e-134	2.67683e-131	DNaseI_Any
TxnFactorChIPV3	H1-hESC	ATF3	242	5046	0.0479588	30.5045	8.59373	24.6104	7.93326	4.84e-134	3.71228e-131	DNaseI_Any
TxnFactorChIPV3	GM12878	MAZ	646	5046	0.128022	158.66	19.8161	24.5931	4.07159	7.46e-134	5.72182e-131	DNaseI_Any
TxnFactorChIPV3	K562+IFNg6h	POLR2A	802	5046	0.158938	223.025	23.5451	24.59	3.59601	8e-134	6.136e-131	DNaseI_Any
H3K9Ac_Broad	HeLa-S3	none	2106	5046	0.41736	990.404	45.3792	24.5839	2.12641	9.38e-134	7.19446e-131	DNaseI_Any
TxnFactorChIPV3	K562+IFNa6h	IRF1	348	5046	0.0689655	56.98	11.8382	24.5831	6.1074	9.55e-134	7.32485e-131	DNaseI_Any
TxnFactorChIPV3	GM18526	POLR2A	811	5046	0.160721	232.536	23.5326	24.5813	3.48763	9.93e-134	7.61631e-131	DNaseI_Any
TxnFactorChIPV3	K562	E2F6	698	5046	0.138327	184.23	20.9175	24.5618	3.78875	1.61e-133	1.23487e-130	DNaseI_Any
TxnFactorChIPV3	GM18526	none	811	5046	0.160721	232.592	23.5491	24.5617	3.48679	1.61e-133	1.23487e-130	DNaseI_Any
TxnFactorChIPV3	HeLa-S3	ZNF143	309	5046	0.0612366	47.5215	10.6464	24.5603	6.50232	1.67e-133	1.28089e-130	DNaseI_Any
H3K4Me3_UW	RPTEC	none	1088	5046	0.215616	374.991	29.0321	24.5593	2.9014	1.71e-133	1.31157e-130	DNaseI_Any
TxnFactorChIPV3	ECC-1+DMSO_0.02pct	POLR2A	924	5046	0.183115	262.957	26.9163	24.5592	3.51388	1.71e-133	1.31157e-130	DNaseI_Any
TxnFactorChIPV3	GM12878	ELK1	308	5046	0.0610384	44.4396	10.7322	24.5579	6.93076	1.78e-133	1.36526e-130	DNaseI_Any
H3K4Me2_Broad	Osteoblasts	none	2597	5046	0.514665	1405.23	48.5869	24.5285	1.84809	3.64e-133	2.79188e-130	DNaseI_Any
TxnFactorChIPV3	H1-hESC	TAF7	409	5046	0.0810543	77.5574	13.5128	24.5281	5.27351	3.68e-133	2.82256e-130	DNaseI_Any
DNaseClusters	HUVEC	none	1835	5046	0.363654	813.371	41.6602	24.5229	2.25604	4.18e-133	3.20606e-130	DNaseI_Any
TxnFactorChIPV3	Raji	POLR2A	804	5046	0.159334	234.734	23.2679	24.4658	3.42515	1.7e-132	1.3039e-129	DNaseI_Any
TxnFactorChIPV3	K562	NR2F2	459	5046	0.0909631	92.9051	14.967	24.4601	4.94053	1.95e-132	1.49565e-129	DNaseI_Any
H3K27Ac_Broad	NHEK	none	1968	5046	0.390012	920.933	42.8335	24.445	2.13696	2.83e-132	2.17061e-129	DNaseI_Any
TxnFactorChIPV3	Raji	none	804	5046	0.159334	234.529	23.298	24.4429	3.42814	2.97e-132	2.27799e-129	DNaseI_Any
TxnFactorChIPV3	MCF10A-Er-Src+EtOH_0.01pct	FOS	969	5046	0.192033	318.738	26.6128	24.4341	3.04011	3.69e-132	2.83023e-129	DNaseI_Any
TxnFactorChIPV3	HeLa-S3	IRF3	145	5046	0.0287356	11.8541	5.45222	24.4205	12.232	5.14e-132	3.94238e-129	DNaseI_Any
TxnFactorChIPV3	SK-N-SH	REST	649	5046	0.128617	164.106	19.8705	24.4027	3.95476	7.98e-132	6.12066e-129	DNaseI_Any
TxnFactorChIPV3	K562	EGR1	741	5046	0.146849	205.104	21.9614	24.4018	3.6128	8.15e-132	6.25105e-129	DNaseI_Any
TxnFactorChIPV3	HEK293	POLR2A	686	5046	0.135949	186.449	20.4929	24.3768	3.6793	1.49e-131	1.14283e-128	DNaseI_Any
BroadChromHMM	NHEK	ActivePromoter	825	5046	0.163496	237.296	24.1204	24.3655	3.47667	1.98e-131	1.51866e-128	DNaseI_Any
TxnFactorChIPV3	H1-hESC	SP4	324	5046	0.0642093	53.4975	11.1037	24.3615	6.05636	2.18e-131	1.67206e-128	DNaseI_Any
BroadChromHMM	HMEC	ActivePromoter	754	5046	0.149425	212.999	22.2142	24.3539	3.53992	2.63e-131	2.01721e-128	DNaseI_Any
TxnFactorChIPV3	K562	TEAD4	619	5046	0.122671	158.067	18.9446	24.3306	3.91606	4.62e-131	3.54354e-128	DNaseI_Any
TxnFactorChIPV3	GM15510	POLR2A	830	5046	0.164487	246.381	23.9894	24.3282	3.36877	4.91e-131	3.76597e-128	DNaseI_Any
TxnFactorChIPV3	K562	NFYA	228	5046	0.0451843	27.9071	8.22985	24.3131	8.16997	7.11e-131	5.45337e-128	DNaseI_Any
TxnFactorChIPV3	GM15510	none	830	5046	0.164487	246.507	24.0134	24.2986	3.36704	1.01e-130	7.7467e-128	DNaseI_Any
TxnFactorChIPV3	ECC-1+DMSO_0.02pct	none	1164	5046	0.230678	402.471	31.3687	24.2768	2.89214	1.72e-130	1.31924e-127	DNaseI_Any
BroadChromHMM	NHLF	ActivePromoter	836	5046	0.165676	245.85	24.3117	24.2743	3.40045	1.83e-130	1.40361e-127	DNaseI_Any
H3K4Me3_UW	PANC-1	none	1084	5046	0.214824	393.409	28.4649	24.2612	2.75541	2.52e-130	1.93284e-127	DNaseI_Any
H3K4Me3_UW	MCF-7	none	1059	5046	0.209869	372.288	28.3118	24.2553	2.84457	2.88e-130	2.20896e-127	DNaseI_Any
H3K4Me3_SYDH	K562	none	949	5046	0.18807	302.11	26.6776	24.2485	3.14124	3.4e-130	2.6078e-127	DNaseI_Any
H3K4Me3_Broad	NHDF-Ad	none	2126	5046	0.421324	1071.22	43.4995	24.2481	1.98465	3.44e-130	2.63848e-127	DNaseI_Any
DNaseClusters	PanIsletD	none	1914	5046	0.37931	874.126	42.8924	24.2438	2.18962	3.83e-130	2.93761e-127	DNaseI_Any
H3K4Me3_SYDH	PANC-1	none	1172	5046	0.232263	426.063	30.7738	24.2394	2.75077	4.26e-130	3.26742e-127	DNaseI_Any
TxnFactorChIPV3	GM12878	E2F4	231	5046	0.0457788	29.0699	8.33193	24.2357	7.94636	4.65e-130	3.56655e-127	DNaseI_Any
TxnFactorChIPV3	GM12891	YY1	502	5046	0.0994847	109.764	16.1851	24.2343	4.57344	4.83e-130	3.70461e-127	DNaseI_Any
H3K9Ac	HUVEC	none	1692	5046	0.335315	751.694	38.8184	24.2232	2.25092	6.34e-130	4.86278e-127	DNaseI_Any
H3K9Ac_Broad	NHLF	none	1832	5046	0.36306	848.909	40.611	24.2075	2.15806	9.25e-130	7.09475e-127	DNaseI_Any
TxnFactorChIPV3	GM18505	none	854	5046	0.169243	265.478	24.3225	24.1967	3.21684	1.2e-129	9.204e-127	DNaseI_Any
H3K4Me2	K562	none	1864	5046	0.369402	865.554	41.2677	24.1944	2.15353	1.27e-129	9.7409e-127	DNaseI_Any
TxnFactorChIPV3	GM18505	POLR2A	854	5046	0.169243	265.52	24.3314	24.186	3.21632	1.56e-129	1.19652e-126	DNaseI_Any
TxnFactorChIPV3	K562	HDAC1	470	5046	0.0931431	101.291	15.2484	24.1802	4.64011	1.79e-129	1.37293e-126	DNaseI_Any
H3K9Ac_Broad	K562	none	1839	5046	0.364447	856.24	40.6567	24.1722	2.14776	2.17e-129	1.66439e-126	DNaseI_Any
H3K4Me2_Broad	NHDF-Ad	none	2570	5046	0.509314	1440.53	46.7315	24.1694	1.78407	2.32e-129	1.77944e-126	DNaseI_Any
BroadChromHMM	K562	ActivePromoter	759	5046	0.150416	215.561	22.4892	24.1645	3.52104	2.61e-129	2.00187e-126	DNaseI_Any
TxnFactorChIPV3	GM12878	NFYB	400	5046	0.0792707	73.8492	13.4982	24.1625	5.41645	2.74e-129	2.10158e-126	DNaseI_Any
H3K4Me3_SYDH	PBMC	none	1020	5046	0.20214	342.142	28.0626	24.1552	2.98122	3.26e-129	2.50042e-126	DNaseI_Any
H3K4Me3	PBMC	none	1020	5046	0.20214	343.172	28.0245	24.1513	2.97227	3.59e-129	2.75353e-126	DNaseI_Any
BroadChromHMM	HSMM	ActivePromoter	774	5046	0.153389	220.159	22.9357	24.1476	3.51564	3.95e-129	3.02965e-126	DNaseI_Any
TxnFactorChIPV3	H1-hESC	SIN3A	692	5046	0.137138	178.719	21.2564	24.1471	3.87199	4e-129	3.068e-126	DNaseI_Any
TxnFactorChIPV3	HeLa-S3	SMC3	734	5046	0.145462	207.539	21.8136	24.1345	3.53668	5.4e-129	4.1418e-126	DNaseI_Any
TxnFactorChIPV3	GM19193	none	862	5046	0.170828	265.754	24.742	24.0985	3.2436	1.29e-128	9.8943e-126	DNaseI_Any
H3K27Ac	K562	none	1729	5046	0.342648	785.617	39.159	24.0911	2.20082	1.55e-128	1.18885e-125	DNaseI_Any
BroadChromHMM	K562	none	2140	5046	0.424098	1079.69	44.0172	24.0885	1.98205	1.64e-128	1.25788e-125	DNaseI_Any
UCSFBrainMethyl	Brain_frontal_cortex	none	1304	5046	0.258423	513.616	32.8737	24.043	2.53886	4.92e-128	3.77364e-125	DNaseI_Any
TxnFactorChIPV3	GM10847	POLR2A	647	5046	0.12822	165.862	20.0159	24.0378	3.90083	5.57e-128	4.27219e-125	DNaseI_Any
H3K4Me3_Broad	HUVEC	none	1626	5046	0.322235	713.402	38.0256	23.9996	2.27922	1.4e-127	1.0738e-124	DNaseI_Any
TxnFactorChIPV3	K562	JUN	338	5046	0.0669837	58.6464	11.6421	23.9951	5.76336	1.56e-127	1.19652e-124	DNaseI_Any
H3K9Ac_Broad	HUVEC	none	1692	5046	0.335315	751.374	39.2246	23.9805	2.25188	2.21e-127	1.69507e-124	DNaseI_Any
H3K9Ac_Broad	HSMM	none	1904	5046	0.377329	903.83	41.7129	23.9775	2.10659	2.38e-127	1.82546e-124	DNaseI_Any
TxnFactorChIPV3	H1-hESC	MYC	293	5046	0.0580658	47.4685	10.2414	23.9745	6.17251	2.55e-127	1.95585e-124	DNaseI_Any
TxnFactorChIPV3	GM10847	none	647	5046	0.12822	166.142	20.0606	23.9703	3.89426	2.83e-127	2.17061e-124	DNaseI_Any
H3K27Ac_Broad	K562	none	1729	5046	0.342648	788.004	39.2652	23.9651	2.19415	3.21e-127	2.46207e-124	DNaseI_Any
TxnFactorChIPV3	GM19193	POLR2A	862	5046	0.170828	266.07	24.868	23.9637	3.23975	3.3e-127	2.5311e-124	DNaseI_Any
TxnFactorChIPV3	T-47D+Genistein_100nM	ESR1	284	5046	0.0562822	44.7592	9.98534	23.9592	6.34506	3.67e-127	2.81489e-124	DNaseI_Any
TxnFactorChIPV3	HEK293	KAP1	502	5046	0.0994847	114.498	16.1794	23.9503	4.38438	4.57e-127	3.50519e-124	DNaseI_Any
H3K9Ac	K562	none	1911	5046	0.378716	908.484	41.8692	23.944	2.10351	5.28e-127	4.04976e-124	DNaseI_Any
H3K4Me3_UW	HCPEpiC	none	1034	5046	0.204915	360.928	28.1236	23.9327	2.86484	6.98e-127	5.35366e-124	DNaseI_Any
TxnFactorChIPV3	A549+DEX_500pM	NR3C1	101	5046	0.0200159	7.04496	3.92848	23.9164	14.3365	1.03e-126	7.9001e-124	DNaseI_Any
TxnFactorChIPV3	HeLa-S3	SMARCC1	377	5046	0.0747126	71.6673	12.769	23.912	5.26042	1.15e-126	8.8205e-124	DNaseI_Any
DNaseClusters	pHTE	none	2204	5046	0.436782	1127.67	45.0353	23.8997	1.95448	1.53e-126	1.17351e-123	DNaseI_Any
TxnFactorChIPV3	T-47D+Estradiol_10nM	ESR1	282	5046	0.0558859	44.5235	9.9396	23.892	6.33374	1.85e-126	1.41895e-123	DNaseI_Any
TxnFactorChIPV3	K562	RBBP5	559	5046	0.110781	136.497	17.6942	23.8781	4.09534	2.57e-126	1.97119e-123	DNaseI_Any
TxnFactorChIPV3	U2OS	none	562	5046	0.111375	134.648	17.8989	23.8759	4.17383	2.72e-126	2.08624e-123	DNaseI_Any
TxnFactorChIPV3	K562+IFNa30	MYC	378	5046	0.0749108	70.3097	12.8905	23.8696	5.37621	3.14e-126	2.40838e-123	DNaseI_Any
H3K27Ac_Broad	HSMMtube	none	2126	5046	0.421324	1103.2	42.8533	23.8674	1.92712	3.33e-126	2.55411e-123	DNaseI_Any
TxnFactorChIPV3	T-47D+Estradiol_10nM	none	282	5046	0.0558859	44.6004	9.94918	23.8612	6.32281	3.84e-126	2.94528e-123	DNaseI_Any
BroadChromHMM	HUVEC	ActivePromoter	669	5046	0.13258	187.567	20.1776	23.8598	3.56672	3.99e-126	3.06033e-123	DNaseI_Any
TxnFactorChIPV3	MCF-7	TCF7L2	355	5046	0.0703528	63.9441	12.2013	23.8544	5.55173	4.52e-126	3.46684e-123	DNaseI_Any
TxnFactorChIPV3	HeLa-S3	SMARCB1	390	5046	0.0772889	77.0819	13.1189	23.8525	5.05955	4.73e-126	3.62791e-123	DNaseI_Any
DNaseClusters	NHEK	none	1830	5046	0.362663	871.112	40.208	23.8482	2.10076	5.26e-126	4.03442e-123	DNaseI_Any
H3K4Me3_Broad	K562	none	1688	5046	0.334522	771.908	38.4146	23.8475	2.18679	5.36e-126	4.11112e-123	DNaseI_Any
TxnFactorChIPV3	A549+DEX_500pM	none	101	5046	0.0200159	7.02398	3.94074	23.8473	14.3793	5.36e-126	4.11112e-123	DNaseI_Any
H3K4Me2_Broad	K562	none	1864	5046	0.369402	865.385	41.8791	23.8452	2.15396	5.68e-126	4.35656e-123	DNaseI_Any
H3K4Me3_Broad	HSMM	none	1667	5046	0.330361	747.704	38.5556	23.8434	2.22949	5.9e-126	4.5253e-123	DNaseI_Any
H3K27Ac_Broad	HSMM	none	1960	5046	0.388426	961.354	41.8862	23.8419	2.03879	6.12e-126	4.69404e-123	DNaseI_Any
TxnFactorChIPV3	T-47D+Genistein_100nM	none	284	5046	0.0562822	44.6943	10.0409	23.833	6.35428	7.57e-126	5.80619e-123	DNaseI_Any
H3K4Me3_Broad	NHEK	none	1815	5046	0.359691	854.346	40.3307	23.8195	2.12443	1.05e-125	8.0535e-123	DNaseI_Any
BroadChromHMM	HSMM	none	2507	5046	0.496829	1364.97	47.9505	23.817	1.83668	1.11e-125	8.5137e-123	DNaseI_Any
H3K4Me3	HUVEC	none	1635	5046	0.324019	727.854	38.1118	23.8022	2.24633	1.58e-125	1.21186e-122	DNaseI_Any
H3K4Me2_Broad	HMEC	none	2361	5046	0.467895	1262.11	46.1691	23.8014	1.87067	1.61e-125	1.23487e-122	DNaseI_Any
BroadChromHMM	H1-hESC	ActivePromoter	581	5046	0.115141	150.105	18.1078	23.7961	3.87063	1.82e-125	1.39594e-122	DNaseI_Any
H3K4Me2_Broad	HSMMtube	none	2500	5046	0.495442	1368.38	47.5724	23.7873	1.82698	2.24e-125	1.71808e-122	DNaseI_Any
H3K4Me3_Broad	HMEC	none	1467	5046	0.290725	608.835	36.0964	23.7743	2.40952	3.08e-125	2.36236e-122	DNaseI_Any
OpenChromSynth	HeLa-S3	none	2165	5046	0.429053	1102.27	44.7102	23.7693	1.96413	3.44e-125	2.63848e-122	DNaseI_Any
TxnFactorChIPV3	H1-hESC	MXI1	311	5046	0.061633	53.1279	10.8595	23.7461	5.8538	5.98e-125	4.58666e-122	DNaseI_Any
TxnFactorChIPV3	GM12878	SRF	311	5046	0.061633	49.9031	10.9966	23.7434	6.23208	6.4e-125	4.9088e-122	DNaseI_Any
DNaseClusters	CMK	none	1305	5046	0.258621	532.277	32.5719	23.7236	2.45173	1.02e-124	7.8234e-122	DNaseI_Any
TxnFactorChIPV3	K562	NFYB	292	5046	0.0578676	50.0669	10.2035	23.7109	5.83219	1.38e-124	1.05846e-121	DNaseI_Any
H3K4Me3_UW	AoAF	none	1119	5046	0.22176	417.939	29.5738	23.7055	2.67742	1.58e-124	1.21186e-121	DNaseI_Any
TxnFactorChIPV3	SK-N-MC	POLR2A	755	5046	0.149623	237.045	21.8553	23.6993	3.18505	1.82e-124	1.39594e-121	DNaseI_Any
TxnFactorChIPV3	GM12892	POLR2A	911	5046	0.180539	310.099	25.3566	23.6981	2.93777	1.87e-124	1.43429e-121	DNaseI_Any
H3K27Ac_Broad	HUVEC	none	1805	5046	0.357709	876.892	39.1651	23.6973	2.05841	1.91e-124	1.46497e-121	DNaseI_Any
TxnFactorChIPV3	MCF10A-Er-Src+4OHTAM_1uM_12hr	FOS	1074	5046	0.212842	414.933	27.8154	23.6943	2.58837	2.06e-124	1.58002e-121	DNaseI_Any
TxnFactorChIPV3	GM12878	FOS	161	5046	0.0319065	16.4725	6.10307	23.6811	9.77385	2.82e-124	2.16294e-121	DNaseI_Any
BroadChromHMM	HMEC	none	2576	5046	0.510503	1423.97	48.668	23.6713	1.80903	3.54e-124	2.71518e-121	DNaseI_Any
TxnFactorChIPV3	K562	SAP30	409	5046	0.0810543	84.98	13.6886	23.6708	4.8129	3.57e-124	2.73819e-121	DNaseI_Any
DNaseClusters	Myometr	none	1628	5046	0.322632	752.253	37	23.6688	2.16417	3.74e-124	2.86858e-121	DNaseI_Any
TxnFactorChIPV3	K562	GTF2F1	229	5046	0.0453825	31.3457	8.36065	23.641	7.30564	7.26e-124	5.56842e-121	DNaseI_Any
TxnFactorChIPV3	K562	CBX3	470	5046	0.0931431	108.063	15.3105	23.6398	4.34932	7.48e-124	5.73716e-121	DNaseI_Any
TxnFactorChIPV3	K562	BCLAF1	235	5046	0.0465715	32.4935	8.57288	23.6218	7.23221	1.15e-123	8.8205e-121	DNaseI_Any
TxnFactorChIPV3	H1-hESC	NRF1	233	5046	0.0461752	33.3287	8.45404	23.6184	6.99098	1.24e-123	9.5108e-121	DNaseI_Any
TxnFactorChIPV3	GM15510+TNFa	none	463	5046	0.0917558	103.253	15.2325	23.6171	4.48414	1.28e-123	9.8176e-121	DNaseI_Any
BroadChromHMM	GM12878	ActivePromoter	785	5046	0.155569	252.65	22.5411	23.6169	3.10706	1.28e-123	9.8176e-121	DNaseI_Any
H3K4Me3_UW	AG04450	none	1079	5046	0.213833	398.043	28.839	23.6124	2.71076	1.44e-123	1.10448e-120	DNaseI_Any
H3K27Ac_Broad	Osteoblasts	none	2589	5046	0.51308	1460.43	47.8179	23.6013	1.77276	1.85e-123	1.41895e-120	DNaseI_Any
H3K4Me2_Broad	HSMM	none	2499	5046	0.495244	1367.43	47.9463	23.6009	1.82752	1.88e-123	1.44196e-120	DNaseI_Any
TxnFactorChIPV3	GM15510+TNFa	RELA	463	5046	0.0917558	103.411	15.2523	23.5761	4.4773	3.37e-123	2.58479e-120	DNaseI_Any
TxnFactorChIPV3	MCF10A-Er-Src+4OHTAM_1uM_36hr	FOS	929	5046	0.184106	321.894	25.7628	23.5652	2.88604	4.35e-123	3.33645e-120	DNaseI_Any
TxnFactorChIPV3	H1-hESC	POLR2A	882	5046	0.174792	282.583	25.4409	23.5611	3.1212	4.82e-123	3.69694e-120	DNaseI_Any
TxnFactorChIPV3	K562	TRIM28	348	5046	0.0689655	66.3487	11.956	23.5574	5.24502	5.25e-123	4.02675e-120	DNaseI_Any
TxnFactorChIPV3	K562	FOS	399	5046	0.0790725	85.033	13.3423	23.5318	4.6923	9.59e-123	7.35553e-120	DNaseI_Any
TxnFactorChIPV3	K562	USF1	443	5046	0.0877923	95.4386	14.7705	23.5308	4.64173	9.77e-123	7.49359e-120	DNaseI_Any
TxnFactorChIPV3	HeLa-S3	E2F1	446	5046	0.0883868	104.063	14.535	23.5251	4.28587	1.13e-122	8.6671e-120	DNaseI_Any
TxnFactorChIPV3	K562	SP2	186	5046	0.0368609	21.975	6.9757	23.5138	8.46415	1.47e-122	1.12749e-119	DNaseI_Any
TxnFactorChIPV3	K562+IFNa30	JUN	296	5046	0.0586603	52.9051	10.3481	23.4917	5.59492	2.46e-122	1.88682e-119	DNaseI_Any
TxnFactorChIPV3	GM12878	GABPA	323	5046	0.0640111	57.0989	11.3228	23.4837	5.65685	2.97e-122	2.27799e-119	DNaseI_Any
H3K9Ac_Broad	NHDF-Ad	none	2230	5046	0.441934	1173.68	44.9945	23.4767	1.90001	3.52e-122	2.69984e-119	DNaseI_Any
H3K4Me3_Broad	HSMMtube	none	2152	5046	0.426476	1113.44	44.2439	23.4736	1.93276	3.76e-122	2.88392e-119	DNaseI_Any
DNaseClusters	CD34+_Mobilized	none	1550	5046	0.307174	691.909	36.5681	23.4656	2.24018	4.58e-122	3.51286e-119	DNaseI_Any
TxnFactorChIPV3	HeLa-S3	SMARCC2	178	5046	0.0352755	21.5544	6.66868	23.4598	8.25816	5.22e-122	4.00374e-119	DNaseI_Any
TxnFactorChIPV3	MCF10A-Er-Src+4OHTAM_1uM_4hr	FOS	1035	5046	0.205113	391.735	27.4273	23.4534	2.64209	6.07e-122	4.65569e-119	DNaseI_Any
H3K4Me2	HUVEC	none	2105	5046	0.417162	1097.7	42.9789	23.437	1.91764	8.93e-122	6.84931e-119	DNaseI_Any
TxnFactorChIPV3	GM12892	YY1	501	5046	0.0992866	121.544	16.2009	23.4218	4.12195	1.28e-121	9.8176e-119	DNaseI_Any
TxnFactorChIPV3	K562	THAP1	198	5046	0.039239	25.1439	7.38927	23.3929	7.87469	2.51e-121	1.92517e-118	DNaseI_Any
H3K4Me3_UW	HMEC	none	971	5046	0.19243	348.116	26.6566	23.367	2.7893	4.6e-121	3.5282e-118	DNaseI_Any
H3K9Ac_Broad	HSMMtube	none	2280	5046	0.451843	1235.19	44.715	23.366	1.84587	4.74e-121	3.63558e-118	DNaseI_Any
H3K4Me2_Broad	HUVEC	none	2105	5046	0.417162	1097.41	43.1347	23.3591	1.91815	5.56e-121	4.26452e-118	DNaseI_Any
H3K4Me3	Monocytes-CD14+_RO01746	none	1856	5046	0.367816	898.052	41.0229	23.3515	2.0667	6.64e-121	5.09288e-118	DNaseI_Any
H3K4Me3	K562	none	1704	5046	0.337693	791.935	39.0855	23.3351	2.15169	9.75e-121	7.47825e-118	DNaseI_Any
H3K4Me3_Broad	Monocytes-CD14+_RO01746	none	1856	5046	0.367816	897.474	41.082	23.332	2.06803	1.04e-120	7.9768e-118	DNaseI_Any
H3K4Me3_Broad	NH-A	none	1828	5046	0.362267	885.464	40.3972	23.3317	2.06446	1.05e-120	8.0535e-118	DNaseI_Any
BroadChromHMM	NHEK	none	2400	5046	0.475624	1325.25	46.0918	23.3176	1.81098	1.46e-120	1.11982e-117	DNaseI_Any
TxnFactorChIPV3	K562	GTF2B	181	5046	0.03587	21.2647	6.85236	23.311	8.51174	1.71e-120	1.31157e-117	DNaseI_Any
TxnFactorChIPV3	GM12891	POLR2A	870	5046	0.172414	285.67	25.0716	23.3064	3.04547	1.89e-120	1.44963e-117	DNaseI_Any
TxnFactorChIPV3	MCF-7	none	1570	5046	0.311138	703.652	37.2016	23.2879	2.23122	2.93e-120	2.24731e-117	DNaseI_Any
H3K4Me2_Broad	NHEK	none	2346	5046	0.464923	1258.68	46.6924	23.2869	1.86386	2.99e-120	2.29333e-117	DNaseI_Any
TxnFactorChIPV3	NB4	none	1268	5046	0.251288	520.885	32.1218	23.2588	2.43432	5.79e-120	4.44093e-117	DNaseI_Any
H3K4Me3_UW	AG09319	none	1007	5046	0.199564	377.384	27.0854	23.2456	2.66837	7.89e-120	6.05163e-117	DNaseI_Any
DNaseClusters	K562	none	1677	5046	0.332342	778.524	38.6565	23.2426	2.15407	8.41e-120	6.45047e-117	DNaseI_Any
H3K9Ac_Broad	Monocytes-CD14+_RO01746	none	2024	5046	0.40111	1057.13	41.6285	23.2262	1.91462	1.23e-119	9.4341e-117	DNaseI_Any
PHF8_Broad	K562	none	1451	5046	0.287554	644.299	34.7416	23.22	2.25206	1.42e-119	1.08914e-116	DNaseI_Any
OpenChromSynth	PanIslets	none	2313	5046	0.458383	1214.13	47.357	23.204	1.90507	2.06e-119	1.58002e-116	DNaseI_Any
H3K4Me1_SYDH	PANC-1	none	1374	5046	0.272295	606.376	33.1024	23.1894	2.26592	2.9e-119	2.2243e-116	DNaseI_Any
TxnFactorChIPV3	NT2-D1	YY1	252	5046	0.0499405	40.2807	9.13182	23.1848	6.25609	3.24e-119	2.48508e-116	DNaseI_Any
DNaseClusters	Urothelia+UT189	none	1590	5046	0.315101	750.303	36.2617	23.1566	2.11914	6.21e-119	4.76307e-116	DNaseI_Any
TxnFactorChIPV3	PANC-1	SIN3AK20	339	5046	0.0671819	72.6503	11.5078	23.1451	4.66619	8.13e-119	6.23571e-116	DNaseI_Any
TxnFactorChIPV3	HCT-116	none	1364	5046	0.270313	598.343	33.1777	23.0775	2.27963	3.89e-118	2.98363e-115	DNaseI_Any
DNaseClusters	HSMMtube	none	2313	5046	0.458383	1263.94	45.4675	23.0726	1.82999	4.35e-118	3.33645e-115	DNaseI_Any
DNaseClusters	HMEC	none	2345	5046	0.464725	1320.14	44.4387	23.0623	1.77633	5.52e-118	4.23384e-115	DNaseI_Any
H3K27Ac_UW	AG04450	none	973	5046	0.192826	360.589	26.5692	23.0496	2.69836	7.36e-118	5.64512e-115	DNaseI_Any
H3K4Me3_UW	HeLa-S3	none	811	5046	0.160721	268.114	23.5601	23.0426	3.02483	8.69e-118	6.66523e-115	DNaseI_Any
TxnFactorChIPV3	GM12878	PBX3	293	5046	0.0580658	52.6164	10.4446	23.0152	5.56861	1.63e-117	1.25021e-114	DNaseI_Any
TxnFactorChIPV3	GM12878	EGR1	475	5046	0.094134	109.807	15.8695	23.0123	4.32576	1.75e-117	1.34225e-114	DNaseI_Any
BroadChromHMM	HUVEC	none	2194	5046	0.4348	1162.25	44.8785	22.9898	1.88771	2.94e-117	2.25498e-114	DNaseI_Any
TxnFactorChIPV3	K562	UBTF	483	5046	0.0957194	119.529	15.8301	22.9607	4.04084	5.74e-117	4.40258e-114	DNaseI_Any
DNaseClusters	GM18507	none	1257	5046	0.249108	524.01	31.928	22.9576	2.39881	6.12e-117	4.69404e-114	DNaseI_Any
TxnFactorChIPV3	SK-N-SH_RA	EP300	715	5046	0.141696	224.112	21.3888	22.9507	3.19037	7.23e-117	5.54541e-114	DNaseI_Any
H3K4Me3_UW	AG10803	none	1030	5046	0.204122	399.663	27.4664	22.9493	2.57717	7.43e-117	5.69881e-114	DNaseI_Any
TxnFactorChIPV3	GM12878	POU2F2	537	5046	0.106421	139.783	17.3127	22.9437	3.84166	8.45e-117	6.48115e-114	DNaseI_Any
DNaseClusters	Melano	none	1997	5046	0.395759	1040.11	41.7158	22.9384	1.91999	9.62e-117	7.37854e-114	DNaseI_Any
H3K27Ac	HUVEC	none	1805	5046	0.357709	876.238	40.4903	22.9379	2.05994	9.71e-117	7.44757e-114	DNaseI_Any
TxnFactorChIPV3	H1-hESC	SIN3AK20	376	5046	0.0745145	78.7243	12.9609	22.9363	4.77616	1.01e-116	7.7467e-114	DNaseI_Any
H2A.Z_Broad	HMEC	none	2339	5046	0.463535	1321.95	44.3569	22.9289	1.76936	1.19e-116	9.1273e-114	DNaseI_Any
OpenChromSynth	HeLa-S3+IFNa4h	none	2344	5046	0.464526	1322.58	44.5683	22.9181	1.7723	1.52e-116	1.16584e-113	DNaseI_Any
H2A.Z_Broad	A549	none	3144	5046	0.623068	1937.21	52.6587	22.9172	1.62295	1.57e-116	1.20419e-113	DNaseI_Any
TxnFactorChIPV3	GM12878	YY1	677	5046	0.134166	212.818	20.3166	22.8474	3.18112	7.73e-116	5.92891e-113	DNaseI_Any
H3K27Ac_Broad	Monocytes-CD14+_RO01746	none	2287	5046	0.45323	1272.68	44.4656	22.8114	1.797	1.76e-115	1.34992e-112	DNaseI_Any
DNaseClusters	SK-N-MC	none	1214	5046	0.240587	491.19	31.6866	22.8113	2.47155	1.76e-115	1.34992e-112	DNaseI_Any
TxnFactorChIPV3	PFSK-1	TAF1	303	5046	0.0600476	58.8332	10.7042	22.8105	5.15016	1.79e-115	1.37293e-112	DNaseI_Any
DNaseClusters	GM06990	none	1060	5046	0.210067	410.473	28.4867	22.8011	2.58239	2.23e-115	1.71041e-112	DNaseI_Any
TxnFactorChIPV3	PBDE	GATA1	492	5046	0.097503	124.313	16.1325	22.7917	3.95776	2.75e-115	2.10925e-112	DNaseI_Any
TxnFactorChIPV3	H1-hESC	SIX5	175	5046	0.0346809	21.8641	6.72083	22.7853	8.00398	3.18e-115	2.43906e-112	DNaseI_Any
H3K4Me3_UW	HPF	none	1029	5046	0.203924	388.614	28.1059	22.7848	2.64787	3.24e-115	2.48508e-112	DNaseI_Any
DNaseClusters	H7-hESC	none	1842	5046	0.365042	936.191	39.7774	22.772	1.96755	4.35e-115	3.33645e-112	DNaseI_Any
H3K9Ac_Broad	NH-A	none	2271	5046	0.450059	1242.2	45.2646	22.7285	1.8282	1.16e-114	8.8972e-112	DNaseI_Any
TxnFactorChIPV3	GM12878	POLR2A	947	5046	0.187673	347.94	26.3853	22.7043	2.72173	2.03e-114	1.55701e-111	DNaseI_Any
TxnFactorChIPV3	NHEK	POLR2A	374	5046	0.0741181	82.2028	12.87	22.6726	4.54972	4.16e-114	3.19072e-111	DNaseI_Any
TxnFactorChIPV3	GM12891	POU2F2	418	5046	0.0828379	93.7972	14.3159	22.6463	4.45642	7.57e-114	5.80619e-111	DNaseI_Any
TxnFactorChIPV3	GM12878	USF2	299	5046	0.0592549	56.049	10.7442	22.6122	5.33462	1.64e-113	1.25788e-110	DNaseI_Any
H3K4Me2_Broad	Monocytes-CD14+_RO01746	none	2109	5046	0.417955	1129.51	43.3242	22.6085	1.86719	1.77e-113	1.35759e-110	DNaseI_Any
TxnFactorChIPV3	H1-hESC	JUND	406	5046	0.0804598	91.3487	13.9187	22.6063	4.44451	1.88e-113	1.44196e-110	DNaseI_Any
TxnFactorChIPV3	GM18951+TNFa	none	410	5046	0.0812525	100.093	13.7187	22.5901	4.09619	2.69e-113	2.06323e-110	DNaseI_Any
H3K27Ac	Monocytes-CD14+_RO01746	none	2287	5046	0.45323	1271.59	44.9588	22.5852	1.79853	3e-113	2.301e-110	DNaseI_Any
TxnFactorChIPV3	MCF-7+vehicle	none	1276	5046	0.252874	543.297	32.4431	22.5843	2.34862	3.08e-113	2.36236e-110	DNaseI_Any
H3K9Ac	Monocytes-CD14+_RO01746	none	2024	5046	0.40111	1059.27	42.7179	22.5838	1.91076	3.11e-113	2.38537e-110	DNaseI_Any
H3K4Me2	Monocytes-CD14+_RO01746	none	2109	5046	0.417955	1130.83	43.3307	22.5745	1.865	3.84e-113	2.94528e-110	DNaseI_Any
TxnFactorChIPV3	GM18951+TNFa	RELA	410	5046	0.0812525	100.192	13.7311	22.5625	4.09215	5.02e-113	3.85034e-110	DNaseI_Any
TxnFactorChIPV3	HeLa-S3	ZKSCAN1	198	5046	0.039239	27.9481	7.53759	22.5605	7.08457	5.26e-113	4.03442e-110	DNaseI_Any
H3K4Me3_UW	HCM	none	935	5046	0.185295	344.762	26.1777	22.5473	2.71201	7.1e-113	5.4457e-110	DNaseI_Any
TxnFactorChIPV3	K562	none	2171	5046	0.430242	1209.82	42.6436	22.5398	1.79448	8.41e-113	6.45047e-110	DNaseI_Any
DNaseClusters	Th2	none	1028	5046	0.203726	405.073	27.6523	22.5272	2.53781	1.12e-112	8.5904e-110	DNaseI_Any
TxnFactorChIPV3	GM12878	ETS1	220	5046	0.0435989	33.3367	8.2925	22.5099	6.59934	1.66e-112	1.27322e-109	DNaseI_Any
H3K27Ac_Broad	NH-A	none	1898	5046	0.37614	1001.22	39.8721	22.4915	1.89569	2.51e-112	1.92517e-109	DNaseI_Any
H2A.Z_Broad	HSMMtube	none	2510	5046	0.497424	1464.23	46.4996	22.4898	1.71421	2.6e-112	1.9942e-109	DNaseI_Any
H3K27Ac_Broad	NHDF-Ad	none	2448	5046	0.485137	1411.98	46.0931	22.4767	1.73374	3.5e-112	2.6845e-109	DNaseI_Any
H2A.Z_Broad	HUVEC	none	2495	5046	0.494451	1488.3	44.8226	22.4597	1.67641	5.11e-112	3.91937e-109	DNaseI_Any
TxnFactorChIPV3	H1-hESC	SP2	148	5046	0.0293302	17.8881	5.79426	22.4553	8.27365	5.64e-112	4.32588e-109	DNaseI_Any
H2A.Z_Broad	K562	none	2300	5046	0.455807	1285.06	45.2211	22.4438	1.78979	7.33e-112	5.62211e-109	DNaseI_Any
TxnFactorChIPV3	HepG2	IRF3	72	5046	0.0142687	4.82617	2.99562	22.424	14.9187	1.15e-111	8.8205e-109	DNaseI_Any
TxnFactorChIPV3	GM12878	BHLHE40	407	5046	0.0806579	92.8362	14.0145	22.417	4.38407	1.34e-111	1.02778e-108	DNaseI_Any
TxnFactorChIPV3	GM12892	PAX5	345	5046	0.068371	74.1908	12.1113	22.3601	4.65017	4.79e-111	3.67393e-108	DNaseI_Any
DNaseClusters	GM12864	none	1263	5046	0.250297	559.022	31.5012	22.3477	2.2593	6.31e-111	4.83977e-108	DNaseI_Any
H3K4Me1_Broad	Osteoblasts	none	2752	5046	0.545382	1705.07	46.857	22.343	1.61401	7.03e-111	5.39201e-108	DNaseI_Any
H3K4Me3_UW	AG04449	none	1006	5046	0.199366	391.776	27.5064	22.3302	2.56779	9.35e-111	7.17145e-108	DNaseI_Any
H3K4Me3_UW	SAEC	none	810	5046	0.160523	291.284	23.23	22.3296	2.78079	9.44e-111	7.24048e-108	DNaseI_Any
TxnFactorChIPV3	HeLa-S3	E2F4	187	5046	0.0370591	24.6893	7.27051	22.3245	7.57413	1.06e-110	8.1302e-108	DNaseI_Any
H3K4Me3_UW	HMF	none	963	5046	0.190844	369.193	26.6137	22.3121	2.60839	1.4e-110	1.0738e-107	DNaseI_Any
TxnFactorChIPV3	H1-hESC	GTF2F1	199	5046	0.0394372	30.1009	7.57118	22.3082	6.6111	1.53e-110	1.17351e-107	DNaseI_Any
TxnFactorChIPV3	H1-hESC	EP300	304	5046	0.0602457	61.7283	10.861	22.3065	4.92481	1.59e-110	1.21953e-107	DNaseI_Any
H3K4Me1	Monocytes-CD14+_RO01746	none	2304	5046	0.456599	1315.45	44.3235	22.3031	1.7515	1.72e-110	1.31924e-107	DNaseI_Any
TxnFactorChIPV3	MCF-7+serum_stimulated_media	none	1234	5046	0.24455	538.722	31.1857	22.2947	2.29061	2.07e-110	1.58769e-107	DNaseI_Any
H3K4Me3_UW	HEK293	none	854	5046	0.169243	319.116	24.006	22.2813	2.67614	2.79e-110	2.13993e-107	DNaseI_Any
H2A.Z_Broad	HSMM	none	2557	5046	0.506738	1520.9	46.6011	22.2333	1.68124	8.13e-110	6.23571e-107	DNaseI_Any
TxnFactorChIPV3	HeLa-S3	JUN	460	5046	0.0911613	119.847	15.3046	22.2255	3.83822	9.71e-110	7.44757e-107	DNaseI_Any
H3K4Me3_UW	HBMEC	none	891	5046	0.176576	335.84	24.9912	22.2142	2.65305	1.25e-109	9.5875e-107	DNaseI_Any
H3K4Me3	HEK293	none	854	5046	0.169243	320.025	24.059	22.1944	2.66854	1.95e-109	1.49565e-106	DNaseI_Any
TxnFactorChIPV3	HEK293	none	1200	5046	0.237812	528.047	30.2813	22.1904	2.27253	2.13e-109	1.63371e-106	DNaseI_Any
TxnFactorChIPV3	GM12878	PAX5	589	5046	0.116726	175.341	18.6616	22.1663	3.35918	3.62e-109	2.77654e-106	DNaseI_Any
Centipede	Any	none	1564	5046	0.309948	793.408	34.7872	22.1516	1.97124	5.04e-109	3.86568e-106	DNaseI_Any
H3K4Me1_Broad	Monocytes-CD14+_RO01746	none	2304	5046	0.456599	1314.92	44.6756	22.1392	1.7522	6.58e-109	5.04686e-106	DNaseI_Any
H3K4Me3_UW	HVMF	none	926	5046	0.183512	359.926	25.5834	22.1266	2.57275	8.73e-109	6.69591e-106	DNaseI_Any
TxnFactorChIPV3	K562	ZBTB7A	512	5046	0.101467	150.339	16.3544	22.114	3.40564	1.15e-108	8.8205e-106	DNaseI_Any
H3K4Me2_Broad	NH-A	none	2528	5046	0.500991	1554.12	44.0992	22.0838	1.62664	2.25e-108	1.72575e-105	DNaseI_Any
TxnFactorChIPV3	H1-hESC	ATF2	268	5046	0.0531114	47.988	9.96724	22.0735	5.58473	2.83e-108	2.17061e-105	DNaseI_Any
TxnFactorChIPV3	GM12878	USF1	308	5046	0.0610384	63.7872	11.0769	22.047	4.82855	5.08e-108	3.89636e-105	DNaseI_Any
DNaseClusters	ProgFib	none	1781	5046	0.352953	924.792	38.8682	22.0285	1.92584	7.62e-108	5.84454e-105	DNaseI_Any
TxnFactorChIPV3	MCF-7	ZNF217	286	5046	0.0566786	56.4555	10.4214	22.0262	5.06593	8.04e-108	6.16668e-105	DNaseI_Any
H3K4Me1_Broad	NHLF	none	2506	5046	0.496631	1519.89	44.9422	21.9417	1.6488	5.16e-107	3.95772e-104	DNaseI_Any
TxnFactorChIPV3	HepG2	BRCA1	116	5046	0.0229885	11.6294	4.76335	21.9112	9.97474	1.02e-106	7.8234e-104	DNaseI_Any
H3K4Me3_UW	HPAF	none	895	5046	0.177368	339.787	25.347	21.9045	2.634	1.17e-106	8.9739e-104	DNaseI_Any
TxnFactorChIPV3	H1-hESC	EGR1	299	5046	0.0592549	62.4775	10.8063	21.8875	4.78572	1.71e-106	1.31157e-103	DNaseI_Any
OpenChromSynth	HTR8svn	none	1756	5046	0.347998	917.153	38.3764	21.8584	1.91462	3.21e-106	2.46207e-103	DNaseI_Any
H2A.Z_Broad	NHEK	none	2597	5046	0.514665	1606.05	45.3878	21.833	1.61701	5.61e-106	4.30287e-103	DNaseI_Any
TxnFactorChIPV3	H1-hESC	YY1	458	5046	0.090765	122.976	15.35	21.8257	3.7243	6.58e-106	5.04686e-103	DNaseI_Any
H3K4Me3_UW	WI-38	none	930	5046	0.184304	368.403	25.7518	21.8081	2.52441	9.66e-106	7.40922e-103	DNaseI_Any
TxnFactorChIPV3	SK-N-SH_RA	none	1340	5046	0.265557	636.143	32.3047	21.7881	2.10645	1.5e-105	1.1505e-102	DNaseI_Any
TxnFactorChIPV3	GM12878	TBL1XR1	399	5046	0.0790725	96.8142	13.8723	21.7834	4.1213	1.66e-105	1.27322e-102	DNaseI_Any
H3K4Me3_UW	NHDF-neo	none	949	5046	0.18807	383.757	26.0006	21.7396	2.47292	4.34e-105	3.32878e-102	DNaseI_Any
H3K4Me3_UW	HCF	none	820	5046	0.162505	312.629	23.3389	21.7392	2.62291	4.34e-105	3.32878e-102	DNaseI_Any
H3K4Me1	HUVEC	none	2280	5046	0.451843	1351.92	42.7028	21.7335	1.68649	4.94e-105	3.78898e-102	DNaseI_Any
TxnFactorChIPV3	HUVEC	MYC	246	5046	0.0487515	45.1798	9.25233	21.7048	5.44491	9.16e-105	7.02572e-102	DNaseI_Any
H3K79Me2_Broad	HeLa-S3	none	1764	5046	0.349584	944.606	37.7781	21.6897	1.86744	1.27e-104	9.7409e-102	DNaseI_Any
TxnFactorChIPV3	GM12878	NFYA	126	5046	0.0249703	14.1119	5.15999	21.6838	8.92864	1.45e-104	1.11215e-101	DNaseI_Any
H3K4Me3_UW	AG09309	none	911	5046	0.180539	360.107	25.4098	21.6803	2.5298	1.57e-104	1.20419e-101	DNaseI_Any
H3K4Me1_Broad	HUVEC	none	2280	5046	0.451843	1352.28	42.7942	21.6785	1.68604	1.63e-104	1.25021e-101	DNaseI_Any
H3K4Me3_SYDH	NT2-D1	none	1007	5046	0.199564	409.672	27.5627	21.6716	2.45806	1.9e-104	1.4573e-101	DNaseI_Any
H3K4Me3_UW	HUVEC	none	782	5046	0.154974	297.187	22.3728	21.6698	2.63134	1.97e-104	1.51099e-101	DNaseI_Any
DNaseClusters	CLL	none	1068	5046	0.211653	446.987	28.6697	21.6609	2.38933	2.38e-104	1.82546e-101	DNaseI_Any
H3K4Me3_UW	HAc	none	845	5046	0.167459	324.111	24.0545	21.6545	2.60713	2.74e-104	2.10158e-101	DNaseI_Any
H3K4Me3_UW	HEEpiC	none	866	5046	0.171621	335.2	24.5303	21.6385	2.58353	3.87e-104	2.96829e-101	DNaseI_Any
DNaseClusters	WERI-Rb-1	none	1358	5046	0.269124	658.467	32.3358	21.6334	2.06237	4.34e-104	3.32878e-101	DNaseI_Any
H2A.Z_Broad	Osteoblasts	none	2617	5046	0.518629	1594.1	47.3126	21.6201	1.64168	5.77e-104	4.42559e-101	DNaseI_Any
H3K4Me3_Broad	Dnd41	none	1164	5046	0.230678	532.871	29.2043	21.6109	2.18439	7.05e-104	5.40735e-101	DNaseI_Any
H3K79Me2_Broad	A549	none	2050	5046	0.406262	1171.67	40.6601	21.6018	1.74964	8.61e-104	6.60387e-101	DNaseI_Any
H3K4Me3_UW	NHLF	none	956	5046	0.189457	392.599	26.1851	21.5161	2.43505	5.47e-103	4.19549e-100	DNaseI_Any
H3K4Me1_SYDH	HCT-116	none	787	5046	0.155965	302.933	22.5123	21.5023	2.59793	7.4e-103	5.6758e-100	DNaseI_Any
H3K4Me1_Broad	HMEC	none	2558	5046	0.506936	1627.53	43.2943	21.4918	1.57171	9.25e-103	7.09475e-100	DNaseI_Any
H3K4Me1_Broad	K562	none	2364	5046	0.46849	1409.1	44.4378	21.4886	1.67767	9.91e-103	7.60097e-100	DNaseI_Any
TxnFactorChIPV3	MCF-7+serum_starved_media	none	1129	5046	0.223742	499.244	29.319	21.4795	2.26142	1.21e-102	9.2807e-100	DNaseI_Any
DNaseClusters	CD20+	none	1073	5046	0.212644	470.203	28.0738	21.4719	2.28199	1.42e-102	1.08914e-99	DNaseI_Any
TxnFactorChIPV3	PFSK-1	SIN3AK20	254	5046	0.0503369	49.3986	9.53152	21.4658	5.14185	1.62e-102	1.24254e-99	DNaseI_Any
H2A.Z_Broad	NHDF-Ad	none	2446	5046	0.48474	1491.95	44.4768	21.4506	1.63947	2.24e-102	1.71808e-99	DNaseI_Any
DNaseClusters	Chorion	none	1559	5046	0.308958	811.381	34.8577	21.4478	1.92142	2.38e-102	1.82546e-99	DNaseI_Any
TxnFactorChIPV3	GM12878	ATF3	111	5046	0.0219976	11.5634	4.63813	21.4389	9.59922	2.88e-102	2.20896e-99	DNaseI_Any
H3K9Ac_SYDH	NT2-D1	none	1079	5046	0.213833	474.702	28.2058	21.4246	2.273	3.93e-102	3.01431e-99	DNaseI_Any
TxnFactorChIPV3	K562	REST	356	5046	0.0705509	89.038	12.463	21.4204	3.99829	4.32e-102	3.31344e-99	DNaseI_Any
TxnFactorChIPV3	H1-hESC	RBBP5	528	5046	0.104637	165.475	16.9257	21.4186	3.19082	4.47e-102	3.42849e-99	DNaseI_Any
DNaseClusters	GM19239	none	1252	5046	0.248117	598.524	30.5172	21.4134	2.09181	4.99e-102	3.82733e-99	DNaseI_Any
TxnFactorChIPV3	GM12891+TNFa	RELA	575	5046	0.113952	188.66	18.0595	21.3926	3.04781	7.8e-102	5.9826e-99	DNaseI_Any
DNaseClusters	HEK293T	none	1505	5046	0.298256	771.415	34.3018	21.3862	1.95096	8.93e-102	6.84931e-99	DNaseI_Any
OpenChromSynth	Gliobla	none	1917	5046	0.379905	1072.61	39.526	21.363	1.78723	1.47e-101	1.12749e-98	DNaseI_Any
TxnFactorChIPV3	GM12878	TCF12	442	5046	0.0875941	124.713	14.8563	21.357	3.54413	1.67e-101	1.28089e-98	DNaseI_Any
TxnFactorChIPV3	K562	ELK1	168	5046	0.0332937	24.3137	6.72826	21.3556	6.90969	1.71e-101	1.31157e-98	DNaseI_Any
H3K79Me2_Broad	K562	none	1626	5046	0.322235	872.257	35.2961	21.3549	1.86413	1.75e-101	1.34225e-98	DNaseI_Any
H3K4Me1	K562	none	2613	5046	0.517836	1637.01	45.7094	21.352	1.5962	1.87e-101	1.43429e-98	DNaseI_Any
TxnFactorChIPV3	GM12878	MYC	229	5046	0.0453825	42.8691	8.72077	21.3434	5.34184	2.23e-101	1.71041e-98	DNaseI_Any
TxnFactorChIPV3	H1-hESC	MAX	342	5046	0.0677765	79.9341	12.2919	21.3203	4.27853	3.67e-101	2.81489e-98	DNaseI_Any
TxnFactorChIPV3	ProgFib	none	1027	5046	0.203528	449.363	27.1008	21.3144	2.28546	4.14e-101	3.17538e-98	DNaseI_Any
Pol2_Broad	HeLa-S3	none	3114	5046	0.617122	2091.87	47.9708	21.3074	1.48862	4.83e-101	3.70461e-98	DNaseI_Any
H3K4Me3_UW	BJ	none	841	5046	0.166667	322.073	24.3706	21.2932	2.61121	6.56e-101	5.03152e-98	DNaseI_Any
H3K4Me3_UW	HCFaa	none	806	5046	0.15973	308.376	23.3952	21.2704	2.6137	1.07e-100	8.2069e-98	DNaseI_Any
TxnFactorChIPV3	ECC-1+DEX_100nM	none	256	5046	0.0507333	50.6693	9.65358	21.2699	5.05237	1.08e-100	8.2836e-98	DNaseI_Any
H3K4Me3_UW	SK-N-MC	none	799	5046	0.158343	306.991	23.1336	21.2681	2.60268	1.11e-100	8.5137e-98	DNaseI_Any
H3K4Me3_UW	HA-sp	none	811	5046	0.160721	310.013	23.5575	21.2665	2.61602	1.15e-100	8.8205e-98	DNaseI_Any
DNaseClusters	GM12865	none	1243	5046	0.246334	582.165	31.0857	21.2585	2.13513	1.37e-100	1.05079e-97	DNaseI_Any
TxnFactorChIPV3	ECC-1+Genistein_100nM	ESR1	287	5046	0.0568767	62.1788	10.5848	21.2401	4.61572	2.02e-100	1.54934e-97	DNaseI_Any
H2A.Z_Broad	NHLF	none	2649	5046	0.52497	1647.57	47.2019	21.2159	1.60782	3.4e-100	2.6078e-97	DNaseI_Any
TxnFactorChIPV3	ECC-1+Genistein_100nM	none	287	5046	0.0568767	62.0889	10.6063	21.2055	4.6224	4.24e-100	3.25208e-97	DNaseI_Any
H3K4Me3_UW	HRE	none	790	5046	0.15656	309.294	22.7064	21.1705	2.55421	8.88e-100	6.81096e-97	DNaseI_Any
H3K9Ac_Broad	GM12878	none	1474	5046	0.292113	749.68	34.2347	21.1575	1.96617	1.17e-99	8.9739e-97	DNaseI_Any
TxnFactorChIPV3	GM12891+TNFa	none	575	5046	0.113952	189.08	18.25	21.1463	3.04104	1.49e-99	1.14283e-96	DNaseI_Any
TxnFactorChIPV3	ECC-1+DEX_100nM	NR3C1	256	5046	0.0507333	50.7632	9.70633	21.1446	5.04302	1.54e-99	1.18118e-96	DNaseI_Any
H3K9Ac	GM12878	none	1474	5046	0.292113	750.61	34.2278	21.1346	1.96374	1.9e-99	1.4573e-96	DNaseI_Any
TxnFactorChIPV3	HUVEC	none	1602	5046	0.317479	882.511	34.1337	21.0786	1.81527	6.22e-99	4.77074e-96	DNaseI_Any
Pol2_Broad	NHEK	none	2298	5046	0.45541	1401.31	42.5693	21.0642	1.63989	8.44e-99	6.47348e-96	DNaseI_Any
H2A.Z_Broad	HeLa-S3	none	2845	5046	0.563813	1881.4	45.7962	21.041	1.51217	1.38e-98	1.05846e-95	DNaseI_Any
BroadChromHMM	HMEC	StrongEnhancer	1077	5046	0.213436	484.648	28.1668	21.0302	2.22223	1.73e-98	1.32691e-95	DNaseI_Any
H3K4Me3_UW	SkMC	none	804	5046	0.159334	334.081	22.4125	20.9669	2.4066	6.54e-98	5.01618e-95	DNaseI_Any
TxnFactorChIPV3	HeLa-S3	E2F6	230	5046	0.0455807	44.2647	8.86797	20.9445	5.19601	1.05e-97	8.0535e-95	DNaseI_Any
DNaseClusters	GM12878	none	1433	5046	0.283987	733.505	33.399	20.9436	1.95363	1.07e-97	8.2069e-95	DNaseI_Any
TxnFactorChIPV3	K562	JUNB	302	5046	0.0598494	71.4106	11.0476	20.8723	4.22906	4.77e-97	3.65859e-94	DNaseI_Any
H3K4Me3_UW	HCT-116	none	750	5046	0.148633	289.855	22.0504	20.8679	2.5875	5.23e-97	4.01141e-94	DNaseI_Any
H3K4Me2_Broad	Dnd41	none	1322	5046	0.26199	660.28	31.738	20.8495	2.00218	7.68e-97	5.89056e-94	DNaseI_Any
TxnFactorChIPV3	GM12878	ATF2	465	5046	0.0921522	147.297	15.2627	20.8157	3.15689	1.55e-96	1.18885e-93	DNaseI_Any
TxnFactorChIPV3	GM12878	BCLAF1	228	5046	0.0451843	46.1319	8.75549	20.7719	4.94235	3.88e-96	2.97596e-93	DNaseI_Any
TxnFactorChIPV3	K562	STAT5A	245	5046	0.0485533	51.7982	9.32047	20.7288	4.72989	9.52e-96	7.30184e-93	DNaseI_Any
TxnFactorChIPV3	HeLa-S3	FOS	257	5046	0.0509314	53.4565	9.82814	20.7103	4.80764	1.4e-95	1.0738e-92	DNaseI_Any
TxnFactorChIPV3	K562	ZNF143	484	5046	0.0959176	157.013	15.7924	20.7054	3.08255	1.54e-95	1.18118e-92	DNaseI_Any
H3K4Me3	GM12878	none	1702	5046	0.337297	945.507	36.5857	20.6773	1.80009	2.76e-95	2.11692e-92	DNaseI_Any
TxnFactorChIPV3	HepG2+forskolin	GRp20	63	5046	0.0124851	4.61339	2.82372	20.6772	13.6559	2.76e-95	2.11692e-92	DNaseI_Any
TxnFactorChIPV3	ECC-1+Estradiol_10nM	none	338	5046	0.0669837	83.2378	12.3275	20.6662	4.06066	3.48e-95	2.66916e-92	DNaseI_Any
TxnFactorChIPV3	K562	RFX5	122	5046	0.0241776	14.9131	5.1855	20.6512	8.18073	4.72e-95	3.62024e-92	DNaseI_Any
H3K79Me2	K562	none	1626	5046	0.322235	871.039	36.5616	20.649	1.86674	4.96e-95	3.80432e-92	DNaseI_Any
H3K79Me2_Broad	HMEC	none	1955	5046	0.387436	1164.08	38.3155	20.6423	1.67944	5.71e-95	4.37957e-92	DNaseI_Any
TxnFactorChIPV3	H1-hESC	USF2	211	5046	0.0418153	41.6593	8.20736	20.6328	5.06489	6.97e-95	5.34599e-92	DNaseI_Any
TxnFactorChIPV3	ECC-1+Estradiol_10nM	ESR1	338	5046	0.0669837	83.1359	12.3596	20.6208	4.06563	8.93e-95	6.84931e-92	DNaseI_Any
DNaseClusters	GM19238	none	1347	5046	0.266944	682.367	32.2714	20.5951	1.97401	1.52e-94	1.16584e-91	DNaseI_Any
TxnFactorChIPV3	K562+IFNa30	STAT2	140	5046	0.0277447	19.8981	5.8328	20.5908	7.03585	1.66e-94	1.27322e-91	DNaseI_Any
H3K4Me3_UW	Monocytes-CD14+_RO01746	none	709	5046	0.140507	275.121	21.1059	20.5572	2.57705	3.29e-94	2.52343e-91	DNaseI_Any
H2A.Z_Broad	GM12878	none	1928	5046	0.382085	1140.48	38.3662	20.5264	1.69051	6.26e-94	4.80142e-91	DNaseI_Any
H3K9Ac_Broad	Dnd41	none	1381	5046	0.273682	696.892	33.3355	20.5219	1.98166	6.85e-94	5.25395e-91	DNaseI_Any
H3K79Me2_Broad	NHLF	none	1946	5046	0.385652	1183.77	37.1654	20.5091	1.6439	8.91e-94	6.83397e-91	DNaseI_Any
DNaseClusters	H9ES	none	1351	5046	0.267737	704.388	31.5345	20.505	1.91798	9.67e-94	7.41689e-91	DNaseI_Any
H3K4Me3_UW	HFF-Myc	none	830	5046	0.164487	338.522	24.019	20.462	2.45183	2.33e-93	1.78711e-90	DNaseI_Any
H3K4Me3_UW	K562	none	760	5046	0.150614	314.625	21.7692	20.459	2.41557	2.49e-93	1.90983e-90	DNaseI_Any
SAP30_Broad	K562	none	1975	5046	0.391399	1172.55	39.2365	20.4515	1.68436	2.91e-93	2.23197e-90	DNaseI_Any
LSD1_Broad	K562	none	2049	5046	0.406064	1238.23	39.6561	20.4451	1.65478	3.31e-93	2.53877e-90	DNaseI_Any
H3K4Me3_Broad	H1-hESC	none	1365	5046	0.270511	705.626	32.2933	20.4183	1.93445	5.74e-93	4.40258e-90	DNaseI_Any
H3K4Me3_UW	HL-60	none	719	5046	0.142489	282.383	21.3992	20.4035	2.54619	7.77e-93	5.95959e-90	DNaseI_Any
TxnFactorChIPV3	HeLa-S3	RAD21	594	5046	0.117717	209.173	18.8634	20.4008	2.83976	8.22e-93	6.30474e-90	DNaseI_Any
H3K4Me3	H1-hESC	none	1365	5046	0.270511	707.28	32.3076	20.358	1.92993	1.96e-92	1.50332e-89	DNaseI_Any
H3K27Ac_Broad	GM12878	none	1502	5046	0.297662	828.911	33.1356	20.3132	1.81202	4.91e-92	3.76597e-89	DNaseI_Any
BroadChromHMM	HepG2	WeakEnhancer	1087	5046	0.215418	518.06	28.0342	20.2945	2.09821	7.15e-92	5.48405e-89	DNaseI_Any
TxnFactorChIPV3	H1-hESC	SRF	159	5046	0.0315101	24.3037	6.64407	20.2732	6.54221	1.11e-91	8.5137e-89	DNaseI_Any
H3K4Me1_Broad	HSMM	none	2471	5046	0.489695	1608.32	42.5601	20.2697	1.53639	1.18e-91	9.0506e-89	DNaseI_Any
TxnFactorChIPV3	K562+IFNg30	JUN	225	5046	0.0445898	49.3856	8.68626	20.2175	4.55598	3.43e-91	2.63081e-88	DNaseI_Any
TxnFactorChIPV3	K562	HDAC2	290	5046	0.0574713	69.1928	10.9309	20.2003	4.19119	4.86e-91	3.72762e-88	DNaseI_Any
TxnFactorChIPV3	H1-hESC	USF1	396	5046	0.078478	117.417	13.8188	20.1597	3.37261	1.1e-90	8.437e-88	DNaseI_Any
TxnFactorChIPV3	GM12878	CHD1	255	5046	0.0505351	58.7672	9.74263	20.1417	4.33915	1.58e-90	1.21186e-87	DNaseI_Any
H2A.Z_Broad	NH-A	none	2425	5046	0.480579	1535.68	44.2343	20.1047	1.5791	3.35e-90	2.56945e-87	DNaseI_Any
TxnFactorChIPV3	GM12878	ZNF143	393	5046	0.0778835	116.826	13.7604	20.0702	3.36397	6.7e-90	5.1389e-87	DNaseI_Any
TxnFactorChIPV3	T-47D+BPA_100nM	none	120	5046	0.0237812	16.7283	5.14782	20.0612	7.17348	7.99e-90	6.12833e-87	DNaseI_Any
TxnFactorChIPV3	K562	TAF7	148	5046	0.0293302	24.2158	6.17231	20.0548	6.11172	9.16e-90	7.02572e-87	DNaseI_Any
H2A.Z_Broad	CD20+	none	1760	5046	0.348791	1008.66	37.4649	20.0545	1.74489	9.16e-90	7.02572e-87	DNaseI_Any
H3K79Me2_Broad	NHEK	none	1912	5046	0.378914	1159.72	37.5118	20.0545	1.64867	9.16e-90	7.02572e-87	DNaseI_Any
DNaseClusters	NT2-D1	none	1368	5046	0.271106	724.855	32.1565	20.0004	1.88727	2.71e-89	2.07857e-86	DNaseI_Any
TxnFactorChIPV3	Gliobla	none	1095	5046	0.217004	535.781	27.9853	19.9826	2.04374	3.89e-89	2.98363e-86	DNaseI_Any
TxnFactorChIPV3	GM10847+TNFa	RELA	280	5046	0.0554895	71.3936	10.441	19.9795	3.92192	4.14e-89	3.17538e-86	DNaseI_Any
H3K4Me3_UW	NHEK	none	703	5046	0.139318	289.272	20.7125	19.9748	2.43024	4.53e-89	3.47451e-86	DNaseI_Any
H3K36Me3_Broad	HepG2	none	2157	5046	0.427467	1352.97	40.2626	19.9697	1.59427	5.02e-89	3.85034e-86	DNaseI_Any
H3K4Me1_Broad	NHEK	none	2289	5046	0.453627	1469.54	41.0486	19.9631	1.55763	5.75e-89	4.41025e-86	DNaseI_Any
TxnFactorChIPV3	GM10847+TNFa	none	280	5046	0.0554895	71.4605	10.4501	19.9557	3.91825	6.65e-89	5.10055e-86	DNaseI_Any
H3K4Me2	GM12878	none	1820	5046	0.360682	1087.02	36.7401	19.9503	1.67429	7.44e-89	5.70648e-86	DNaseI_Any
H3K79Me2_Broad	Osteoblasts	none	2163	5046	0.428656	1391.88	38.6543	19.9491	1.55401	7.62e-89	5.84454e-86	DNaseI_Any
BroadChromHMM	H1-hESC	none	2071	5046	0.410424	1264.26	40.4595	19.9394	1.63811	9.23e-89	7.07941e-86	DNaseI_Any
TxnFactorChIPV3	T-47D+BPA_100nM	ESR1	120	5046	0.0237812	16.7343	5.18279	19.9247	7.17092	1.24e-88	9.5108e-86	DNaseI_Any
BroadChromHMM	HepG2	WeakPromoter	765	5046	0.151605	323.934	22.1399	19.9218	2.36159	1.31e-88	1.00477e-85	DNaseI_Any
H3K79Me2_Broad	Monocytes-CD14+_RO01746	none	1710	5046	0.338882	1008.2	35.2407	19.9146	1.6961	1.51e-88	1.15817e-85	DNaseI_Any
TxnFactorChIPV3	HEK293-T-REx	none	554	5046	0.10979	201.403	17.7082	19.9116	2.75071	1.61e-88	1.23487e-85	DNaseI_Any
BroadChromHMM	NHEK	StrongEnhancer	1016	5046	0.201348	486.731	26.6078	19.8915	2.08739	2.41e-88	1.84847e-85	DNaseI_Any
H3K4Me3_Broad	GM12878	none	1879	5046	0.372374	1130.74	37.6382	19.8803	1.66174	3.01e-88	2.30867e-85	DNaseI_Any
TxnFactorChIPV3	K562	TAL1	356	5046	0.0705509	104.174	12.6879	19.8477	3.41737	5.73e-88	4.39491e-85	DNaseI_Any
H3K4Me2_Broad	H1-hESC	none	1775	5046	0.351764	1045.32	36.7649	19.8472	1.69805	5.78e-88	4.43326e-85	DNaseI_Any
TxnFactorChIPV3	GM12892	none	1098	5046	0.217598	549.46	27.6509	19.8381	1.99833	6.94e-88	5.32298e-85	DNaseI_Any
H3K79Me2_Broad	GM12878	none	1614	5046	0.319857	961.806	32.9206	19.8111	1.67809	1.19e-87	9.1273e-85	DNaseI_Any
H3K27Ac	GM12878	none	1502	5046	0.297662	828.157	34.087	19.7684	1.81367	2.79e-87	2.13993e-84	DNaseI_Any
TxnFactorChIPV3	HEK293-T-REx	ZNF263	554	5046	0.10979	201.392	17.8372	19.7682	2.75086	2.79e-87	2.13993e-84	DNaseI_Any
TxnFactorChIPV3	K562+IFNg6h	STAT1	118	5046	0.0233849	16.4216	5.13869	19.7674	7.18567	2.83e-87	2.17061e-84	DNaseI_Any
TxnFactorChIPV3	MCF-7	GATA3	277	5046	0.054895	69.5275	10.5178	19.7259	3.98404	6.45e-87	4.94715e-84	DNaseI_Any
BroadChromHMM	NHLF	StrongEnhancer	917	5046	0.181728	407.501	25.8727	19.6925	2.2503	1.24e-86	9.5108e-84	DNaseI_Any
RBBP5_Broad	K562	none	2458	5046	0.487119	1637.07	41.7793	19.6491	1.50146	2.94e-86	2.25498e-83	DNaseI_Any
BroadChromHMM	K562	StrongEnhancer	767	5046	0.152002	333.031	22.1251	19.6143	2.30309	5.83e-86	4.47161e-83	DNaseI_Any
TxnFactorChIPV3	H1-hESC	BRCA1	110	5046	0.0217994	14.6563	4.87235	19.5683	7.50528	1.44e-85	1.10448e-82	DNaseI_Any
DNaseClusters	8988T	none	1535	5046	0.304201	868.564	34.0665	19.5628	1.76728	1.59e-85	1.21953e-82	DNaseI_Any
BroadChromHMM	GM12878	none	1907	5046	0.377923	1165.06	37.9608	19.5448	1.63682	2.28e-85	1.74876e-82	DNaseI_Any
H3K4Me2_Broad	GM12878	none	1820	5046	0.360682	1087.4	37.5167	19.5273	1.67372	3.2e-85	2.4544e-82	DNaseI_Any
OpenChromSynth	NHEK	none	1973	5046	0.391003	1204.88	39.3608	19.5149	1.63751	4.08e-85	3.12936e-82	DNaseI_Any
CHD1_Broad	K562	none	2373	5046	0.470273	1569.62	41.2815	19.4611	1.51183	1.17e-84	8.9739e-82	DNaseI_Any
TxnFactorChIPV3	GM12878	FOXM1	454	5046	0.0899723	148.556	15.7266	19.4221	3.05608	2.5e-84	1.9175e-81	DNaseI_Any
TxnFactorChIPV3	K562	CHD1	311	5046	0.061633	85.2148	11.6326	19.4097	3.6496	3.18e-84	2.43906e-81	DNaseI_Any
H3K79Me2_Broad	NHDF-Ad	none	1863	5046	0.369203	1159.78	36.2318	19.4089	1.60634	3.23e-84	2.47741e-81	DNaseI_Any
H3K4Me1	PBMC	none	1675	5046	0.331946	984.765	35.5695	19.4052	1.70091	3.46e-84	2.65382e-81	DNaseI_Any
H3K4Me1_SYDH	PBMC	none	1675	5046	0.331946	984.512	35.6596	19.3633	1.70135	7.83e-84	6.00561e-81	DNaseI_Any
PLU1_Broad	K562	none	2307	5046	0.457194	1502.76	41.5348	19.3629	1.53517	7.89e-84	6.05163e-81	DNaseI_Any
H3K79Me2	Monocytes-CD14+_RO01746	none	1710	5046	0.338882	1009.15	36.2137	19.3532	1.6945	9.58e-84	7.34786e-81	DNaseI_Any
TxnFactorChIPV3	K562	ARID3A	218	5046	0.0432025	48.6563	8.75704	19.338	4.4804	1.29e-83	9.8943e-81	DNaseI_Any
H3K79Me2_Broad	HUVEC	none	1826	5046	0.361871	1114.55	36.7935	19.3362	1.63832	1.33e-83	1.02011e-80	DNaseI_Any
H3K4Me1_Broad	NHDF-Ad	none	2645	5046	0.524178	1804.33	43.6504	19.2591	1.46592	5.91e-83	4.53297e-80	DNaseI_Any
H3K4Me1_Broad	HSMMtube	none	2690	5046	0.533096	1854.2	43.4016	19.2573	1.45076	6.1e-83	4.6787e-80	DNaseI_Any
H3K4Me2	H1-hESC	none	1775	5046	0.351764	1047.16	37.8289	19.2403	1.69506	8.49e-83	6.51183e-80	DNaseI_Any
H3K4Me3_UW	SK-N-SH_RA	none	721	5046	0.142885	301.783	21.8112	19.2202	2.38913	1.25e-82	9.5875e-80	DNaseI_Any
TxnFactorChIPV3	GM12878	RUNX3	798	5046	0.158145	344.004	23.6312	19.2117	2.31974	1.47e-82	1.12749e-79	DNaseI_Any
H3K79Me2_Broad	NH-A	none	1995	5046	0.395363	1293.39	36.525	19.2089	1.54245	1.55e-82	1.18885e-79	DNaseI_Any
TxnFactorChIPV3	H1-hESC	BACH1	274	5046	0.0543004	71.9391	10.5202	19.2069	3.80878	1.61e-82	1.23487e-79	DNaseI_Any
H3K4Me3	GM12864	none	878	5046	0.173999	410.027	24.3681	19.2043	2.14132	1.7e-82	1.3039e-79	DNaseI_Any
H3K79Me2	HUVEC	none	1826	5046	0.361871	1114.85	37.0308	19.2042	1.63788	1.7e-82	1.3039e-79	DNaseI_Any
TxnFactorChIPV3	K562	NR2C2	56	5046	0.0110979	4.64136	2.67549	19.196	12.0654	2e-82	1.534e-79	DNaseI_Any
H3K4Me3_UW	GM12864	none	878	5046	0.173999	408.86	24.4945	19.1529	2.14743	4.55e-82	3.48985e-79	DNaseI_Any
OpenChromSynth	HUVEC	none	1995	5046	0.395363	1241.14	39.3663	19.1498	1.60739	4.84e-82	3.71228e-79	DNaseI_Any
TxnFactorChIPV3	K562+IFNa6h	JUN	162	5046	0.0321046	31.2627	6.82802	19.1472	5.18189	5.11e-82	3.91937e-79	DNaseI_Any
TxnFactorChIPV3	K562	MEF2A	157	5046	0.0311138	27.9201	6.74163	19.1467	5.62319	5.15e-82	3.95005e-79	DNaseI_Any
H3K4Me3_UW	BE2_C	none	805	5046	0.159532	361.945	23.2054	19.0927	2.22409	1.45e-81	1.11215e-78	DNaseI_Any
H3K4Me1_Broad	NH-A	none	2444	5046	0.484344	1640.62	42.083	19.0903	1.48968	1.52e-81	1.16584e-78	DNaseI_Any
BroadChromHMM	HUVEC	StrongEnhancer	1031	5046	0.20432	501.838	27.733	19.0806	2.05445	1.82e-81	1.39594e-78	DNaseI_Any
DNaseClusters	Osteobl	none	2111	5046	0.418351	1376.89	38.4902	19.0726	1.53316	2.12e-81	1.62604e-78	DNaseI_Any
TxnFactorChIPV3	GM12878	EP300	389	5046	0.0770908	121.723	14.04	19.0369	3.19577	4.19e-81	3.21373e-78	DNaseI_Any
TxnFactorChIPV3	GM12878	WRNIP1	323	5046	0.0640111	92.5075	12.1086	19.0354	3.49161	4.33e-81	3.32111e-78	DNaseI_Any
CpGIsland	Any	none	721	5046	0.142885	317.501	21.2036	19.0297	2.27086	4.81e-81	3.68927e-78	DNaseI_Any
DNaseClusters	GM19240	none	1371	5046	0.2717	775.993	31.2682	19.0291	1.76677	4.89e-81	3.75063e-78	DNaseI_Any
TxnFactorChIPV3	GM12878	TCF3	333	5046	0.0659929	98.5215	12.3249	19.0247	3.37997	5.31e-81	4.07277e-78	DNaseI_Any
H3K4Me3	CD20+_RO01778	none	758	5046	0.150218	340.051	22.0131	18.9863	2.22908	1.1e-80	8.437e-78	DNaseI_Any
DNaseClusters	Jurkat	none	1129	5046	0.223742	589.204	28.5535	18.9048	1.91615	5.21e-80	3.99607e-77	DNaseI_Any
H3K79Me2_Broad	HSMMtube	none	2094	5046	0.414982	1348.72	39.4382	18.8974	1.55258	5.97e-80	4.57899e-77	DNaseI_Any
H3K4Me3_UW	H7-hESC	none	799	5046	0.158343	362.568	23.1066	18.8878	2.20372	7.16e-80	5.49172e-77	DNaseI_Any
DNaseClusters	Fibrobl	none	2191	5046	0.434205	1460.42	38.6984	18.8788	1.50025	8.46e-80	6.48882e-77	DNaseI_Any
H3K79Me2	GM12878	none	1614	5046	0.319857	963.224	34.4901	18.8685	1.67562	1.03e-79	7.9001e-77	DNaseI_Any
TxnFactorChIPV3	GM12878	ZBTB33	113	5046	0.022394	16.8452	5.09853	18.8593	6.70816	1.23e-79	9.4341e-77	DNaseI_Any
Pol2_Broad	K562	none	2321	5046	0.459968	1544.5	41.3413	18.7826	1.50275	5.22e-79	4.00374e-76	DNaseI_Any
TxnFactorChIPV3	GM12892+TNFa	none	252	5046	0.0499405	63.3227	10.0521	18.7699	3.97962	6.64e-79	5.09288e-76	DNaseI_Any
TxnFactorChIPV3	MCF-7+serum_starved_media	MYC	206	5046	0.0408244	47.3427	8.45514	18.7646	4.35126	7.33e-79	5.62211e-76	DNaseI_Any
OpenChromSynth	GM18507	none	1498	5046	0.296869	879.857	32.9814	18.7422	1.70255	1.12e-78	8.5904e-76	DNaseI_Any
H3K4Me2_Broad	CD20+	none	1778	5046	0.352358	1109.83	35.6536	18.7405	1.60204	1.15e-78	8.8205e-76	DNaseI_Any
TxnFactorChIPV3	GM12892+TNFa	RELA	252	5046	0.0499405	63.3117	10.0724	18.7332	3.98031	1.32e-78	1.01244e-75	DNaseI_Any
H3K4Me3_UW	CD20+_RO01778	none	758	5046	0.150218	338.875	22.4133	18.6998	2.23681	2.48e-78	1.90216e-75	DNaseI_Any
TxnFactorChIPV3	H1-hESC	KDM5A	91	5046	0.0180341	11.8781	4.23617	18.6777	7.66114	3.74e-78	2.86858e-75	DNaseI_Any
H3K79Me2_Broad	HSMM	none	1859	5046	0.368411	1172.36	36.8311	18.6431	1.5857	7.17e-78	5.49939e-75	DNaseI_Any
Pol2_Broad	HUVEC	none	2158	5046	0.427665	1411.29	40.125	18.6095	1.52909	1.34e-77	1.02778e-74	DNaseI_Any
H3K4Me3_UW	NB4	none	662	5046	0.131193	279.847	20.5719	18.5765	2.36558	2.48e-77	1.90216e-74	DNaseI_Any
DNaseClusters	GM12891	none	1219	5046	0.241577	675.745	29.3982	18.4792	1.80393	1.51e-76	1.15817e-73	DNaseI_Any
H3K4Me3_UW	GM06990	none	792	5046	0.156956	369.451	22.8739	18.473	2.14372	1.7e-76	1.3039e-73	DNaseI_Any
CTCF_Broad	HepG2	none	944	5046	0.187079	464.111	26.0543	18.4188	2.034	4.61e-76	3.53587e-73	DNaseI_Any
H3K4Me3	GM06990	none	792	5046	0.156956	370.678	22.8997	18.3985	2.13662	6.72e-76	5.15424e-73	DNaseI_Any
H3K27Ac_Broad	CD20+_RO01794	none	1836	5046	0.363853	1166.29	36.4557	18.3704	1.57422	1.13e-75	8.6671e-73	DNaseI_Any
BroadChromHMM	HSMM	StrongEnhancer	957	5046	0.189655	480.73	25.9546	18.3501	1.99072	1.64e-75	1.25788e-72	DNaseI_Any
H3K4Me2	CD20+	none	1778	5046	0.352358	1107.4	36.5579	18.3436	1.60557	1.84e-75	1.41128e-72	DNaseI_Any
H3K4Me3_UW	HFF	none	673	5046	0.133373	296.879	20.5458	18.3065	2.26692	3.65e-75	2.79955e-72	DNaseI_Any
HDAC1_Broad	K562	none	2559	5046	0.507134	1794.16	41.7997	18.2977	1.42629	4.29e-75	3.29043e-72	DNaseI_Any
TxnFactorChIPV3	K562	GATA2	375	5046	0.0743163	125.718	13.6323	18.2862	2.98286	5.31e-75	4.07277e-72	DNaseI_Any
H3K4Me3_UW	Jurkat	none	665	5046	0.131788	294.284	20.2751	18.2843	2.25972	5.51e-75	4.22617e-72	DNaseI_Any
DNaseClusters	GM12892	none	1301	5046	0.257828	740.843	30.6936	18.25	1.75611	1.03e-74	7.9001e-72	DNaseI_Any
JMJD2A_Broad	H1-hESC	none	1441	5046	0.285573	857.489	32.0934	18.1817	1.68049	3.58e-74	2.74586e-71	DNaseI_Any
TxnFactorChIPV3	PBMC	none	400	5046	0.0792707	140.837	14.2652	18.1675	2.84016	4.66e-74	3.57422e-71	DNaseI_Any
H3K4Me3	GM12875	none	628	5046	0.124455	277.588	19.2922	18.1634	2.26234	5.01e-74	3.84267e-71	DNaseI_Any
TxnFactorChIPV3	HeLa-S3	SMARCA4	90	5046	0.0178359	12.4925	4.26757	18.162	7.20432	5.16e-74	3.95772e-71	DNaseI_Any
TxnFactorChIPV3	H1-hESC	none	1684	5046	0.33373	1045.72	35.1781	18.1442	1.61037	7.11e-74	5.45337e-71	DNaseI_Any
H3K27Ac	CD20+_RO01794	none	1836	5046	0.363853	1164.31	37.0688	18.1201	1.5769	1.1e-73	8.437e-71	DNaseI_Any
TxnFactorChIPV3	H1-hESC	CHD1	273	5046	0.0541023	79.7862	10.7153	18.0315	3.42164	5.5e-73	4.2185e-70	DNaseI_Any
H3K4Me1_Broad	Dnd41	none	1588	5046	0.314705	965.634	34.5366	18.0205	1.64451	6.69e-73	5.13123e-70	DNaseI_Any
TxnFactorChIPV3	HEK293	TCF7L2	210	5046	0.0416171	51.7233	8.78501	18.0167	4.06007	7.19e-73	5.51473e-70	DNaseI_Any
TxnFactorChIPV3	PBMC	STAT4	301	5046	0.0596512	92.8831	11.5675	17.9915	3.24063	1.13e-72	8.6671e-70	DNaseI_Any
SAP30_Broad	H1-hESC	none	1435	5046	0.284384	855.561	32.2862	17.9469	1.67726	2.52e-72	1.93284e-69	DNaseI_Any
TxnFactorChIPV3	GM12891	none	1186	5046	0.235038	649.279	29.9094	17.9449	1.82664	2.62e-72	2.00954e-69	DNaseI_Any
H3K27Ac_Broad	Dnd41	none	1953	5046	0.387039	1305.1	36.1702	17.9124	1.49643	4.68e-72	3.58956e-69	DNaseI_Any
TxnFactorChIPV3	K562	SPI1	359	5046	0.0711455	124.292	13.1116	17.9008	2.88837	5.81e-72	4.45627e-69	DNaseI_Any
TxnFactorChIPV3	K562	USF2	111	5046	0.0219976	18.3327	5.17709	17.8995	6.05477	5.94e-72	4.55598e-69	DNaseI_Any
TxnFactorChIPV3	GM12878	RXRA	81	5046	0.0160523	10.2707	3.96177	17.8529	7.88649	1.36e-71	1.04312e-68	DNaseI_Any
BroadChromHMM	H1-hESC	WeakPromoter	606	5046	0.120095	260.228	19.3698	17.8511	2.32873	1.41e-71	1.08147e-68	DNaseI_Any
DNaseClusters	Adult_CD4_Th0	none	1448	5046	0.28696	865.342	32.6887	17.8245	1.67333	2.27e-71	1.74109e-68	DNaseI_Any
TxnFactorChIPV3	NT2-D1	none	265	5046	0.0525168	74.1209	10.757	17.7447	3.57524	9.45e-71	7.24815e-68	DNaseI_Any
H2A.Z_Broad	Dnd41	none	1725	5046	0.341855	1081.14	36.3063	17.7341	1.59554	1.14e-70	8.7438e-68	DNaseI_Any
TxnFactorChIPV3	K562	ZBTB33	118	5046	0.0233849	21.0799	5.48376	17.674	5.59774	3.3e-70	2.5311e-67	DNaseI_Any
OpenChromSynth	K562	none	1841	5046	0.364843	1200.02	36.3001	17.6579	1.53415	4.42e-70	3.39014e-67	DNaseI_Any
TxnFactorChIPV3	K562+IFNa6h	STAT1	77	5046	0.0152596	10.1419	3.78733	17.6531	7.5923	4.81e-70	3.68927e-67	DNaseI_Any
DNaseClusters	H1-hESC	none	1674	5046	0.331748	1067.03	34.4528	17.6173	1.56884	9.03e-70	6.92601e-67	DNaseI_Any
H3K4Me3_UW	GM12875	none	628	5046	0.124455	277.257	19.9197	17.6078	2.26505	1.07e-69	8.2069e-67	DNaseI_Any
H3K4Me1_SYDH	K562	none	1336	5046	0.264764	768.807	32.3124	17.5534	1.73776	2.79e-69	2.13993e-66	DNaseI_Any
TxnFactorChIPV3	K562	MAFK	242	5046	0.0479588	68.3966	9.92278	17.4954	3.53819	7.74e-69	5.93658e-66	DNaseI_Any
H3K79Me2_Broad	H1-hESC	none	1547	5046	0.306579	968.056	33.0928	17.4946	1.59805	7.85e-69	6.02095e-66	DNaseI_Any
CHD4_Mi2_Broad	K562	none	2027	5046	0.401704	1348.91	38.7964	17.4781	1.50269	1.05e-68	8.0535e-66	DNaseI_Any
H3K4Me3	CD20+_RO01794	none	624	5046	0.123662	280.791	19.6529	17.4635	2.22229	1.36e-68	1.04312e-65	DNaseI_Any
H3K4Me3_UW	CD20+_RO01794	none	624	5046	0.123662	279.275	19.7943	17.4154	2.23436	3.14e-68	2.40838e-65	DNaseI_Any
TxnFactorChIPV3	GM12878	MEF2A	289	5046	0.0572731	90.969	11.4138	17.3502	3.17691	9.79e-68	7.50893e-65	DNaseI_Any
P300_Broad	K562	none	3248	5046	0.643678	2514.25	42.308	17.3431	1.29184	1.11e-67	8.5137e-65	DNaseI_Any
TxnFactorChIPV3	GM18505+TNFa	RELA	232	5046	0.045977	64.6054	9.65925	17.33	3.59103	1.4e-67	1.0738e-64	DNaseI_Any
TxnFactorChIPV3	GM18505+TNFa	none	232	5046	0.045977	64.6134	9.68315	17.2864	3.59059	2.98e-67	2.28566e-64	DNaseI_Any
DNaseClusters	iPS	none	1480	5046	0.293302	903.725	33.4078	17.2497	1.63767	5.6e-67	4.2952e-64	DNaseI_Any
H3K4Me3	GM12865	none	788	5046	0.156163	400.308	22.5082	17.2245	1.96849	8.65e-67	6.63455e-64	DNaseI_Any
H3K4Me3_UW	GM12878	none	747	5046	0.148038	366.378	22.14	17.1916	2.03888	1.52e-66	1.16584e-63	DNaseI_Any
TxnFactorChIPV3	K562	FOSL1	202	5046	0.0400317	55.1608	8.55728	17.1596	3.66202	2.66e-66	2.04022e-63	DNaseI_Any
H3K79Me2	H1-hESC	none	1547	5046	0.306579	968.195	33.7501	17.1497	1.59782	3.14e-66	2.40838e-63	DNaseI_Any
CHD1_Broad	H1-hESC	none	2591	5046	0.513476	1904.27	40.1442	17.1065	1.36062	6.6e-66	5.0622e-63	DNaseI_Any
NSD2_Broad	K562	none	2979	5046	0.590369	2257.45	42.297	17.0591	1.31963	1.49e-65	1.14283e-62	DNaseI_Any
TxnFactorChIPV3	GM12878	EBF1	557	5046	0.110384	252.272	17.9252	17	2.20794	4.08e-65	3.12936e-62	DNaseI_Any
H3K4Me3_UW	GM12865	none	788	5046	0.156163	399.895	22.9213	16.9321	1.97052	1.3e-64	9.971e-62	DNaseI_Any
H3K4Me3_UW	WERI-Rb-1	none	710	5046	0.140706	345.813	21.5437	16.9045	2.05313	2.07e-64	1.58769e-61	DNaseI_Any
TxnFactorChIPV3	HeLa-S3	PRDM1	118	5046	0.0233849	22.7902	5.67767	16.7692	5.17766	2.05e-63	1.57235e-60	DNaseI_Any
TxnFactorChIPV3	MCF-7+estrogen	none	782	5046	0.154974	397.133	22.9767	16.7503	1.96911	2.81e-63	2.15527e-60	DNaseI_Any
H3K79Me2_Broad	Dnd41	none	1538	5046	0.304796	995.678	32.5673	16.6524	1.54468	1.45e-62	1.11215e-59	DNaseI_Any
SIRT6_Broad	K562	none	2259	5046	0.447681	1612.85	38.8882	16.6155	1.40062	2.69e-62	2.06323e-59	DNaseI_Any
H3K9Ac	H1-hESC	none	2296	5046	0.455014	1640.98	39.4433	16.6066	1.39916	3.11e-62	2.38537e-59	DNaseI_Any
H3K9Ac_Broad	H1-hESC	none	2296	5046	0.455014	1641.02	39.4859	16.5876	1.39913	4.28e-62	3.28276e-59	DNaseI_Any
H3K4Me1_Broad	GM12878	none	2137	5046	0.423504	1517.47	37.3975	16.5662	1.40827	6.1e-62	4.6787e-59	DNaseI_Any
TxnFactorChIPV3	GM19099+TNFa	RELA	202	5046	0.0400317	56.5025	8.81069	16.5137	3.57506	1.45e-61	1.11215e-58	DNaseI_Any
CTCF_Broad	CD20+	none	1030	5046	0.204122	600.026	26.0391	16.5126	1.71659	1.48e-61	1.13516e-58	DNaseI_Any
TxnFactorChIPV3	GM19099+TNFa	none	202	5046	0.0400317	56.5145	8.84523	16.4479	3.5743	4.33e-61	3.32111e-58	DNaseI_Any
CTCF_Broad	NHLF	none	1333	5046	0.26417	827.975	30.8712	16.3591	1.60995	1.87e-60	1.43429e-57	DNaseI_Any
HDAC2_Broad	K562	none	2622	5046	0.51962	1960.05	40.5431	16.327	1.33772	3.16e-60	2.42372e-57	DNaseI_Any
NCoR_Broad	K562	none	2260	5046	0.44788	1625.09	38.9899	16.2839	1.39069	6.41e-60	4.91647e-57	DNaseI_Any
TxnFactorChIPV3	IMR90	MAFK	318	5046	0.0630202	116.763	12.3617	16.2791	2.72346	6.93e-60	5.31531e-57	DNaseI_Any
H3K36Me3_Broad	A549	none	2170	5046	0.430044	1562.6	37.5111	16.1925	1.38871	2.83e-59	2.17061e-56	DNaseI_Any
TxnFactorChIPV3	HEK293	ELK4	72	5046	0.0142687	10.8591	3.77983	16.1755	6.63036	3.75e-59	2.87625e-56	DNaseI_Any
TxnFactorChIPV3	K562+IFNg30	STAT1	82	5046	0.0162505	13.3956	4.24775	16.1508	6.12141	5.61e-59	4.30287e-56	DNaseI_Any
H3K9Me1_Broad	NHEK	none	2942	5046	0.583036	2309.62	39.2022	16.1311	1.2738	7.7e-59	5.9059e-56	DNaseI_Any
TxnFactorChIPV3	H1-hESC	GABPA	177	5046	0.0350773	47.4535	8.0363	16.1202	3.72996	9.17e-59	7.03339e-56	DNaseI_Any
TxnFactorChIPV3	H1-hESC	ZNF143	409	5046	0.0810543	162.552	15.3209	16.0857	2.51611	1.6e-58	1.2272e-55	DNaseI_Any
TxnFactorChIPV3	GM12878	NFIC	411	5046	0.0814507	169.9	14.9895	16.0846	2.41907	1.63e-58	1.25021e-55	DNaseI_Any
RBBP5_Broad	H1-hESC	none	2437	5046	0.482957	1813.27	38.8218	16.0665	1.34398	2.18e-58	1.67206e-55	DNaseI_Any
TxnFactorChIPV3	H1-hESC	RXRA	57	5046	0.0112961	7.47752	3.09899	15.9802	7.62285	8.75e-58	6.71125e-55	DNaseI_Any
TxnFactorChIPV3	GM12878+TNFa	none	304	5046	0.0602457	113.689	11.9449	15.9324	2.67395	1.89e-57	1.44963e-54	DNaseI_Any
TxnFactorChIPV3	GM12878+TNFa	RELA	304	5046	0.0602457	113.706	11.9439	15.9324	2.67355	1.89e-57	1.44963e-54	DNaseI_Any
TxnFactorChIPV3	GM12878	STAT3	159	5046	0.0315101	41.4116	7.41259	15.8633	3.8395	5.66e-57	4.34122e-54	DNaseI_Any
TxnFactorChIPV3	K562	SIRT6	77	5046	0.0152596	12.7572	4.05191	15.8549	6.03579	6.47e-57	4.96249e-54	DNaseI_Any
H3K27Ac	H1-hESC	none	2488	5046	0.493064	1853.84	40.1475	15.7958	1.34208	1.66e-56	1.27322e-53	DNaseI_Any
TxnFactorChIPV3	GM12878	NR2C2	58	5046	0.0114943	7.35964	3.21162	15.7678	7.88082	2.58e-56	1.97886e-53	DNaseI_Any
TxnFactorChIPV3	HUVEC	JUN	382	5046	0.0757035	155.309	14.3835	15.7605	2.45962	2.89e-56	2.21663e-53	DNaseI_Any
H3K27Ac_Broad	H1-hESC	none	2488	5046	0.493064	1855.55	40.1478	15.753	1.34084	3.26e-56	2.50042e-53	DNaseI_Any
TxnFactorChIPV3	H1-hESC	TEAD4	283	5046	0.056084	100.798	11.597	15.7111	2.80759	6.34e-56	4.86278e-53	DNaseI_Any
TxnFactorChIPV3	H1-hESC	TCF12	164	5046	0.032501	44.4745	7.61102	15.7043	3.6875	7.06e-56	5.41502e-53	DNaseI_Any
TxnFactorChIPV3	GM12878	IRF4	272	5046	0.0539041	95.5445	11.2437	15.6938	2.84684	8.31e-56	6.37377e-53	DNaseI_Any
EZH2_Broad	GM12878	none	2884	5046	0.571542	2268.5	39.2392	15.6857	1.27132	9.43e-56	7.23281e-53	DNaseI_Any
TxnFactorChIPV3	K562	MAFF	240	5046	0.0475624	77.4216	10.4405	15.5719	3.09991	5.64e-55	4.32588e-52	DNaseI_Any
CTCF_Broad	Monocytes-CD14+_RO01746	none	876	5046	0.173603	502.269	24.027	15.5547	1.74409	7.38e-55	5.66046e-52	DNaseI_Any
TxnFactorChIPV3	GM12878	MTA3	255	5046	0.0505351	88.2637	10.7241	15.5478	2.88907	8.21e-55	6.29707e-52	DNaseI_Any
H3K4Me1	GM12878	none	1920	5046	0.380499	1362.78	35.887	15.5271	1.40889	1.14e-54	8.7438e-52	DNaseI_Any
TxnFactorChIPV3	GM12878	none	1655	5046	0.327983	1132.49	33.6758	15.5158	1.46138	1.35e-54	1.03545e-51	DNaseI_Any
H3K36Me3_Broad	HeLa-S3	none	2155	5046	0.427071	1565.15	38.1269	15.4707	1.37686	2.73e-54	2.09391e-51	DNaseI_Any
CTCF_Broad	K562	none	1237	5046	0.245145	791.466	28.8908	15.4213	1.56292	5.86e-54	4.49462e-51	DNaseI_Any
TxnFactorChIPV3	K562+IFNg6h	JUN	146	5046	0.0289338	37.7193	7.04799	15.3634	3.8707	1.44e-53	1.10448e-50	DNaseI_Any
TxnFactorChIPV3	H1-hESC	JUN	75	5046	0.0148633	13.1958	4.02512	15.3546	5.68362	1.64e-53	1.25788e-50	DNaseI_Any
CTCF_Broad	Osteoblasts	none	992	5046	0.196591	591.524	26.0824	15.3543	1.67702	1.65e-53	1.26555e-50	DNaseI_Any
TxnFactorChIPV3	H1-hESC	HDAC2	135	5046	0.0267539	34.6394	6.55567	15.309	3.8973	3.32e-53	2.54644e-50	DNaseI_Any
PCAF_Broad	K562	none	2810	5046	0.556877	2194.27	40.3043	15.2771	1.28061	5.43e-53	4.16481e-50	DNaseI_Any
H3K9Me1_Broad	HUVEC	none	3073	5046	0.608997	2454.77	40.4691	15.2766	1.25185	5.46e-53	4.18782e-50	DNaseI_Any
H3K9Me1	HUVEC	none	3073	5046	0.608997	2455.79	40.5794	15.21	1.25133	1.52e-52	1.16584e-49	DNaseI_Any
TxnFactorChIPV3	NHEK	none	886	5046	0.175585	514.95	24.3967	15.209	1.72056	1.54e-52	1.18118e-49	DNaseI_Any
TxnFactorChIPV3	GM12878	MEF2C	173	5046	0.0342846	50.0669	8.10904	15.16	3.45537	3.23e-52	2.47741e-49	DNaseI_Any
TxnFactorChIPV3	HepG2	SP2	82	5046	0.0162505	14.6084	4.45674	15.1213	5.61321	5.83e-52	4.47161e-49	DNaseI_Any
CTCF_Broad	NHEK	none	965	5046	0.191241	580.6	25.4502	15.104	1.66207	7.62e-52	5.84454e-49	DNaseI_Any
OpenChromSynth	GM12878	none	1569	5046	0.310939	1057.35	33.9352	15.0773	1.4839	1.14e-51	8.7438e-49	DNaseI_Any
TxnFactorChIPV3	HeLa-S3	REST	173	5046	0.0342846	51.6693	8.09268	14.9926	3.34821	4.09e-51	3.13703e-48	DNaseI_Any
H4K20Me1_Broad	CD20+_RO01794	none	1794	5046	0.355529	1289.5	33.7298	14.9571	1.39124	6.99e-51	5.36133e-48	DNaseI_Any
H4K20Me1_Broad	HSMMtube	none	1772	5046	0.351169	1257.99	34.375	14.9529	1.40859	7.42e-51	5.69114e-48	DNaseI_Any
CTCF_Broad	HeLa-S3	none	1620	5046	0.321046	1125.8	33.2172	14.8779	1.43898	2.29e-50	1.75643e-47	DNaseI_Any
HDAC2_Broad	H1-hESC	none	2257	5046	0.447285	1686.95	38.4351	14.8316	1.33792	4.58e-50	3.51286e-47	DNaseI_Any
TxnFactorChIPV3	GM12878	REST	160	5046	0.0317083	45.3726	7.76286	14.7661	3.52636	1.21e-49	9.2807e-47	DNaseI_Any
TxnFactorChIPV3	K562+IFNa30	STAT1	63	5046	0.0124851	10.1359	3.59298	14.7132	6.21555	2.65e-49	2.03255e-46	DNaseI_Any
BroadChromHMM	HSMM	WeakPromoter	482	5046	0.0955212	232.047	17.0658	14.6464	2.07717	7.06e-49	5.41502e-46	DNaseI_Any
TxnFactorChIPV3	SK-N-SH_RA	RAD21	564	5046	0.111772	292.314	18.5721	14.6288	1.92943	9.2e-49	7.0564e-46	DNaseI_Any
TxnFactorChIPV3	HUVEC	GATA2	352	5046	0.0697582	152.555	13.6735	14.5862	2.30736	1.71e-48	1.31157e-45	DNaseI_Any
DNaseClusters	Medullo	none	1315	5046	0.260602	889.26	29.312	14.5245	1.47876	4.22e-48	3.23674e-45	DNaseI_Any
TxnFactorChIPV3	GM12878	ZEB1	137	5046	0.0271502	33.9041	7.10822	14.5038	4.04081	5.71e-48	4.37957e-45	DNaseI_Any
DNaseClusters	Th1	none	1672	5046	0.331352	1195.6	32.8966	14.4818	1.39846	7.87e-48	6.03629e-45	DNaseI_Any
TxnFactorChIPV3	HUVEC	FOS	501	5046	0.0992866	254.341	17.1204	14.4073	1.9698	2.32e-47	1.77944e-44	DNaseI_Any
TxnFactorChIPV3	K562	SETDB1	100	5046	0.0198177	22.4735	5.38252	14.4034	4.44968	2.46e-47	1.88682e-44	DNaseI_Any
H4K20Me1	CD20+_RO01794	none	1794	5046	0.355529	1289.57	35.0518	14.3911	1.39116	2.94e-47	2.25498e-44	DNaseI_Any
BroadChromHMM	NHLF	WeakEnhancer	1046	5046	0.207293	667.274	26.4047	14.3431	1.56757	5.87e-47	4.50229e-44	DNaseI_Any
H3K36Me3_Broad	K562	none	1826	5046	0.361871	1316.93	35.5014	14.3393	1.38655	6.19e-47	4.74773e-44	DNaseI_Any
H3K36Me3	K562	none	1836	5046	0.363853	1326.77	35.6079	14.3012	1.38382	1.08e-46	8.2836e-44	DNaseI_Any
P300_KAT3B_Broad	Osteoblasts	none	2334	5046	0.462545	1767.33	39.683	14.2798	1.32063	1.46e-46	1.11982e-43	DNaseI_Any
TxnFactorChIPV3	GM12878	STAT5A	176	5046	0.0348791	54.7003	8.54097	14.2021	3.21753	4.43e-46	3.39781e-43	DNaseI_Any
H3K36Me3_Broad	HSMM	none	2490	5046	0.49346	1946.15	38.3505	14.1809	1.27945	5.99e-46	4.59433e-43	DNaseI_Any
CTCF_Broad	HUVEC	none	863	5046	0.171027	521.194	24.1146	14.1742	1.65581	6.6e-46	5.0622e-43	DNaseI_Any
H2A.Z_Broad	H1-hESC	none	2632	5046	0.521601	2061.38	40.3735	14.1336	1.27681	1.18e-45	9.0506e-43	DNaseI_Any
TxnFactorChIPV3	GM12878	SPI1	394	5046	0.0780816	183.148	14.9296	14.1231	2.15127	1.37e-45	1.05079e-42	DNaseI_Any
TxnFactorChIPV3	GM12878	CEBPB	143	5046	0.0283393	41.3247	7.20038	14.1208	3.4604	1.41e-45	1.08147e-42	DNaseI_Any
TxnFactorChIPV3	IMR90	RAD21	402	5046	0.0796671	192.205	14.8617	14.1165	2.09152	1.5e-45	1.1505e-42	DNaseI_Any
CTCF_Broad	NHDF-Ad	none	1033	5046	0.204717	651.516	27.0907	14.0817	1.58553	2.45e-45	1.87915e-42	DNaseI_Any
H3K9Me1_Broad	K562	none	2911	5046	0.576893	2370.65	38.4013	14.0712	1.22793	2.85e-45	2.18595e-42	DNaseI_Any
PHF8_Broad	H1-hESC	none	1780	5046	0.352755	1311.52	33.6587	13.9184	1.3572	2.44e-44	1.87148e-41	DNaseI_Any
H3K36Me3_Broad	NHEK	none	2068	5046	0.40983	1553.55	37.0462	13.8867	1.33114	3.81e-44	2.92227e-41	DNaseI_Any
CTCF_Broad	A549	none	1095	5046	0.217004	716.035	27.3715	13.8453	1.52925	6.76e-44	5.18492e-41	DNaseI_Any
TxnFactorChIPV3	GM12891	SPI1	411	5046	0.0814507	202.184	15.0854	13.8422	2.0328	7.07e-44	5.42269e-41	DNaseI_Any
TxnFactorChIPV3	K562	NFE2	67	5046	0.0132778	12.7932	3.92201	13.8212	5.23715	9.49e-44	7.27883e-41	DNaseI_Any
EZH2_Broad	H1-hESC	none	2041	5046	0.404479	1551.36	35.5099	13.7887	1.31562	1.49e-43	1.14283e-40	DNaseI_Any
H3K9Me1	K562	none	2911	5046	0.576893	2369.32	39.3924	13.7508	1.22862	2.52e-43	1.93284e-40	DNaseI_Any
EZH2_Broad	HSMM	none	2906	5046	0.575902	2382.09	38.2733	13.6886	1.21994	5.92e-43	4.54064e-40	DNaseI_Any
H4K20Me1_Broad	NH-A	none	2474	5046	0.490289	1969.55	37.0105	13.63	1.25613	1.32e-42	1.01244e-39	DNaseI_Any
TxnFactorChIPV3	SH-SY5Y	GATA2	348	5046	0.0689655	159.865	13.8091	13.624	2.17683	1.44e-42	1.10448e-39	DNaseI_Any
TxnFactorChIPV3	PFSK-1	REST	186	5046	0.0368609	64.0919	8.94872	13.623	2.90208	1.46e-42	1.11982e-39	DNaseI_Any
H4K20Me1_Broad	Monocytes-CD14+_RO01746	none	1502	5046	0.297662	1075.48	31.3215	13.6176	1.39659	1.57e-42	1.20419e-39	DNaseI_Any
TxnFactorChIPV3	ECC-1+BPA_100nM	none	98	5046	0.0194213	24.007	5.44967	13.5775	4.08214	2.72e-42	2.08624e-39	DNaseI_Any
CTCF_Broad	HSMMtube	none	1253	5046	0.248315	848.752	29.7901	13.5699	1.47628	3.02e-42	2.31634e-39	DNaseI_Any
TxnFactorChIPV3	ECC-1+BPA_100nM	ESR1	98	5046	0.0194213	23.968	5.47257	13.5278	4.08878	5.34e-42	4.09578e-39	DNaseI_Any
TxnFactorChIPV3	K562	BCL3	57	5046	0.0112961	9.88711	3.49002	13.4993	5.76508	7.86e-42	6.02862e-39	DNaseI_Any
TxnFactorChIPV3	H1-hESC	RFX5	60	5046	0.0118906	10.4935	3.67208	13.4818	5.71782	9.98e-42	7.65466e-39	DNaseI_Any
CTCF_Broad	HSMM	none	838	5046	0.166072	514.435	24.0484	13.4548	1.62897	1.44e-41	1.10448e-38	DNaseI_Any
HDAC6_Broad	K562	none	2792	5046	0.55331	2273.89	38.5975	13.4234	1.22785	2.2e-41	1.6874e-38	DNaseI_Any
BroadChromHMM	H1-hESC	StrongEnhancer	233	5046	0.0461752	96.2498	10.2028	13.4032	2.42079	2.9e-41	2.2243e-38	DNaseI_Any
TxnFactorChIPV3	K562	HDAC8	66	5046	0.0130797	13.4795	3.91942	13.4001	4.89632	3.01e-41	2.30867e-38	DNaseI_Any
TxnFactorChIPV3	GM19193+TNFa	none	130	5046	0.025763	38.5455	6.84311	13.3645	3.37264	4.86e-41	3.72762e-38	DNaseI_Any
TxnFactorChIPV3	GM19193+TNFa	RELA	130	5046	0.025763	38.5285	6.86523	13.3239	3.37413	8.39e-41	6.43513e-38	DNaseI_Any
TxnFactorChIPV3	K562+IFNa6h	STAT2	58	5046	0.0114943	11.3736	3.51401	13.2687	5.09952	1.76e-40	1.34992e-37	DNaseI_Any
TxnFactorChIPV3	H1-hESC	MAFK	131	5046	0.0259612	40.4825	6.83315	13.2468	3.23596	2.34e-40	1.79478e-37	DNaseI_Any
CHD7_Broad	K562	none	2739	5046	0.542806	2218.66	39.4711	13.1829	1.23453	5.48e-40	4.20316e-37	DNaseI_Any
H4K20Me1	Monocytes-CD14+_RO01746	none	1502	5046	0.297662	1074.58	32.538	13.1361	1.39776	1.02e-39	7.8234e-37	DNaseI_Any
TxnFactorChIPV3	GM12878	BCL3	212	5046	0.0420135	84.023	9.79278	13.0685	2.52312	2.48e-39	1.90216e-36	DNaseI_Any
TxnFactorChIPV3	K562	GATA1	101	5046	0.0200159	27.2557	5.64558	13.0623	3.70564	2.7e-39	2.0709e-36	DNaseI_Any
BroadChromHMM	NHLF	WeakPromoter	393	5046	0.0778835	201.039	14.7529	13.0117	1.95484	5.23e-39	4.01141e-36	DNaseI_Any
TxnFactorChIPV3	SH-SY5Y	none	352	5046	0.0697582	170.411	13.9755	12.9934	2.0656	6.65e-39	5.10055e-36	DNaseI_Any
H3K36Me3	HUVEC	none	1878	5046	0.372176	1428.39	34.708	12.9542	1.31477	1.11e-38	8.5137e-36	DNaseI_Any
TxnFactorChIPV3	K562	CTCFL	163	5046	0.0323028	58.6014	8.06412	12.9461	2.7815	1.23e-38	9.4341e-36	DNaseI_Any
TxnFactorChIPV3	GM12878	NFE2	37	5046	0.00733254	5.06194	2.48398	12.8576	7.30945	3.88e-38	2.97596e-35	DNaseI_Any
H4K20Me1_Broad	Osteoblasts	none	2296	5046	0.455014	1819.54	37.1837	12.8137	1.26186	6.84e-38	5.24628e-35	DNaseI_Any
TxnFactorChIPV3	GM12878	RCOR1	58	5046	0.0114943	11.4985	3.65517	12.7221	5.04414	2.22e-37	1.70274e-34	DNaseI_Any
ORegAnno	Any	none	286	5046	0.0566786	130.538	12.2376	12.7036	2.19093	2.81e-37	2.15527e-34	DNaseI_Any
H3K36Me3_Broad	NHLF	none	2084	5046	0.413	1621.49	36.4581	12.6861	1.28524	3.52e-37	2.69984e-34	DNaseI_Any
TxnFactorChIPV3	PBMC	IRF5	184	5046	0.0364645	70.1259	8.98666	12.6715	2.62385	4.25e-37	3.25975e-34	DNaseI_Any
CTCF_Broad	Dnd41	none	1341	5046	0.265755	958.888	30.1885	12.6575	1.39849	5.08e-37	3.89636e-34	DNaseI_Any
TxnFactorChIPV3	AG09319	CTCF	521	5046	0.10325	298.576	17.7645	12.5207	1.74495	2.87e-36	2.20129e-33	DNaseI_Any
TxnFactorChIPV3	AG09319	none	521	5046	0.10325	298.28	17.7996	12.5127	1.74668	3.18e-36	2.43906e-33	DNaseI_Any
H3K36Me3_Broad	HUVEC	none	1849	5046	0.366429	1408.57	35.3735	12.4509	1.31268	6.89e-36	5.28463e-33	DNaseI_Any
H3K4Me1_Broad	H1-hESC	none	2292	5046	0.454221	1842.36	36.2322	12.41	1.24406	1.15e-35	8.8205e-33	DNaseI_Any
BroadChromHMM	HMEC	WeakPromoter	371	5046	0.0735236	188.734	14.6953	12.403	1.96573	1.26e-35	9.6642e-33	DNaseI_Any
EZH2_Broad	HUVEC	none	2129	5046	0.421918	1648.86	38.7713	12.3838	1.29119	1.6e-35	1.2272e-32	DNaseI_Any
TxnFactorChIPV3	GM18526+TNFa	none	90	5046	0.0178359	23.7013	5.36765	12.3515	3.79726	2.39e-35	1.83313e-32	DNaseI_Any
TxnFactorChIPV3	BJ	CTCF	477	5046	0.0945303	272.848	16.5323	12.3487	1.74823	2.47e-35	1.89449e-32	DNaseI_Any
TxnFactorChIPV3	GM18526+TNFa	RELA	90	5046	0.0178359	23.7602	5.37145	12.3318	3.78784	3.05e-35	2.33935e-32	DNaseI_Any
TxnFactorChIPV3	BJ	none	477	5046	0.0945303	272.942	16.6537	12.253	1.74762	8.07e-35	6.18969e-32	DNaseI_Any
TxnFactorChIPV3	H1-hESC	CTBP2	175	5046	0.0346809	66.4066	8.87026	12.2424	2.63528	9.18e-35	7.04106e-32	DNaseI_Any
TxnFactorChIPV3	GM12878	BRCA1	31	5046	0.00614348	4.36663	2.17955	12.2197	7.09929	1.22e-34	9.3574e-32	DNaseI_Any
CHD7_Broad	H1-hESC	none	2815	5046	0.557868	2346.9	38.3178	12.2164	1.19946	1.27e-34	9.7409e-32	DNaseI_Any
TxnFactorChIPV3	Caco-2	CTCF	468	5046	0.0927467	268.118	16.3829	12.2006	1.7455	1.54e-34	1.18118e-31	DNaseI_Any
TxnFactorChIPV3	Caco-2	none	468	5046	0.0927467	268.361	16.3851	12.1842	1.74392	1.88e-34	1.44196e-31	DNaseI_Any
TxnFactorChIPV3	H1-hESC	FOSL1	41	5046	0.00812525	6.8991	2.80443	12.1597	5.9428	2.54e-34	1.94818e-31	DNaseI_Any
TxnFactorChIPV3	AG04449	CTCF	517	5046	0.102457	303.031	17.6478	12.1244	1.7061	3.9e-34	2.9913e-31	DNaseI_Any
TxnFactorChIPV3	AG04449	none	517	5046	0.102457	303.06	17.6579	12.1158	1.70593	4.35e-34	3.33645e-31	DNaseI_Any
CTCF_Broad	NH-A	none	1032	5046	0.204518	717.78	25.9471	12.11	1.43777	4.65e-34	3.56655e-31	DNaseI_Any
H3K4Me1	H1-hESC	none	2292	5046	0.454221	1840.68	37.6957	11.9728	1.2452	2.45e-33	1.87915e-30	DNaseI_Any
BroadChromHMM	H1-hESC	WeakEnhancer	1139	5046	0.225723	791.99	28.9881	11.9708	1.43815	2.53e-33	1.94051e-30	DNaseI_Any
H3K36Me3_Broad	NHDF-Ad	none	2011	5046	0.398533	1582.55	35.8748	11.943	1.27074	3.52e-33	2.69984e-30	DNaseI_Any
SETDB1_Broad	K562	none	2876	5046	0.569956	2424.82	37.824	11.9284	1.18607	4.19e-33	3.21373e-30	DNaseI_Any
H4K20Me1_Broad	HUVEC	none	1983	5046	0.392985	1567.23	34.8734	11.9221	1.26529	4.52e-33	3.46684e-30	DNaseI_Any
H3K36Me3_Broad	HMEC	none	1853	5046	0.367222	1445.86	34.247	11.8884	1.28159	6.77e-33	5.19259e-30	DNaseI_Any
JARID1A_Broad	H1-hESC	none	1761	5046	0.348989	1353.16	34.3247	11.8818	1.3014	7.34e-33	5.62978e-30	DNaseI_Any
TxnFactorChIPV3	HepG2	CTCF	568	5046	0.112564	346.907	18.6207	11.8735	1.63733	8.12e-33	6.22804e-30	DNaseI_Any
TxnFactorChIPV3	K562	RDBP	28	5046	0.00554895	3.80819	2.04088	11.8536	7.35257	1.03e-32	7.9001e-30	DNaseI_Any
H4K20Me1	HUVEC	none	1983	5046	0.392985	1566.29	35.5288	11.7288	1.26605	4.52e-32	3.46684e-29	DNaseI_Any
TxnFactorChIPV3	MCF-7+serum_stimulated_media	CTCF	567	5046	0.112366	338.282	19.648	11.6408	1.67612	1.27e-31	9.7409e-29	DNaseI_Any
SIRT6_Broad	H1-hESC	none	3383	5046	0.670432	2955.41	36.9515	11.5717	1.14468	2.86e-31	2.19362e-28	DNaseI_Any
REST_Broad	K562	none	1210	5046	0.239794	869.884	29.4844	11.5355	1.39099	4.36e-31	3.34412e-28	DNaseI_Any
BroadChromHMM	K562	WeakEnhancer	875	5046	0.173405	592.183	24.6379	11.479	1.47758	8.39e-31	6.43513e-28	DNaseI_Any
TxnFactorChIPV3	K562	BACH1	76	5046	0.0150614	19.7612	4.90632	11.4625	3.84591	1.01e-30	7.7467e-28	DNaseI_Any
OpenChromSynth	GM19239	none	1748	5046	0.346413	1361.28	33.8096	11.4382	1.28409	1.34e-30	1.02778e-27	DNaseI_Any
EZH2_Broad	K562	none	3015	5046	0.597503	2576.79	38.4494	11.397	1.17006	2.16e-30	1.65672e-27	DNaseI_Any
RNF2_Broad	K562	none	1592	5046	0.315497	1221.32	32.5511	11.3876	1.30351	2.4e-30	1.8408e-27	DNaseI_Any
TxnFactorChIPV3	A549	CTCF	568	5046	0.112564	355.248	18.7445	11.3501	1.59888	3.69e-30	2.83023e-27	DNaseI_Any
TxnFactorChIPV3	AG10803	CTCF	469	5046	0.0929449	280.187	16.7391	11.2798	1.67388	8.24e-30	6.32008e-27	DNaseI_Any
TxnFactorChIPV3	K562	SMARCB1	56	5046	0.0110979	12.9451	3.82465	11.2572	4.32598	1.06e-29	8.1302e-27	DNaseI_Any
TxnFactorChIPV3	GM12878	NFATC1	169	5046	0.0334919	70.5784	8.75123	11.2466	2.3945	1.2e-29	9.204e-27	DNaseI_Any
TxnFactorChIPV3	HCPEpiC	CTCF	559	5046	0.110781	347.296	18.8815	11.2123	1.60958	1.77e-29	1.35759e-26	DNaseI_Any
TxnFactorChIPV3	AoAF	CTCF	458	5046	0.090765	271.132	16.6713	11.209	1.68921	1.84e-29	1.41128e-26	DNaseI_Any
TxnFactorChIPV3	PBDEFetal	GATA1	60	5046	0.0118906	14.4705	4.07718	11.1669	4.14636	2.95e-29	2.26265e-26	DNaseI_Any
TxnFactorChIPV3	GM12892	CTCF	478	5046	0.0947285	287.608	17.051	11.166	1.66198	2.98e-29	2.28566e-26	DNaseI_Any
TxnFactorChIPV3	AoAF	none	458	5046	0.090765	271.268	16.7276	11.1631	1.68837	3.09e-29	2.37003e-26	DNaseI_Any
TxnFactorChIPV3	NHDF-neo	none	462	5046	0.0915577	273.117	16.9473	11.1454	1.69158	3.76e-29	2.88392e-26	DNaseI_Any
TxnFactorChIPV3	NHDF-neo	CTCF	462	5046	0.0915577	273.208	16.9728	11.1232	1.69102	4.82e-29	3.69694e-26	DNaseI_Any
TxnFactorChIPV3	HCPEpiC	none	559	5046	0.110781	347.458	19.0835	11.0851	1.60883	7.4e-29	5.6758e-26	DNaseI_Any
TxnFactorChIPV3	HPAF	none	524	5046	0.103845	324.115	18.0478	11.0753	1.61671	8.24e-29	6.32008e-26	DNaseI_Any
TxnFactorChIPV3	PBDEFetal	none	60	5046	0.0118906	14.5135	4.1134	11.0581	4.13409	9.98e-29	7.65466e-26	DNaseI_Any
TxnFactorChIPV3	HPAF	CTCF	524	5046	0.103845	324.357	18.1319	11.0106	1.61551	1.69e-28	1.29623e-25	DNaseI_Any
EZH2_Broad	NH-A	none	2914	5046	0.577487	2480.93	39.4452	10.979	1.17456	2.41e-28	1.84847e-25	DNaseI_Any
TxnFactorChIPV3	SAEC	none	434	5046	0.0860087	255.864	16.2641	10.9527	1.69621	3.22e-28	2.46974e-25	DNaseI_Any
TxnFactorChIPV3	NHEK	CTCF	583	5046	0.115537	369.789	19.4942	10.9372	1.57657	3.83e-28	2.93761e-25	DNaseI_Any
TxnFactorChIPV3	SAEC	CTCF	434	5046	0.0860087	256.01	16.2872	10.9282	1.69525	4.22e-28	3.23674e-25	DNaseI_Any
TxnFactorChIPV3	AG10803	none	469	5046	0.0929449	279.512	17.3518	10.9203	1.67792	4.6e-28	3.5282e-25	DNaseI_Any
BroadChromHMM	HUVEC	WeakPromoter	303	5046	0.0600476	160.602	13.0423	10.9181	1.88665	4.71e-28	3.61257e-25	DNaseI_Any
TxnFactorChIPV3	HCM	CTCF	496	5046	0.0982957	301.138	17.868	10.9057	1.64709	5.4e-28	4.1418e-25	DNaseI_Any
TxnFactorChIPV3	MCF-7+serum_starved_media	CTCF	517	5046	0.102457	312.662	18.8042	10.8666	1.65354	8.3e-28	6.3661e-25	DNaseI_Any
TxnFactorChIPV3	IMR90	CTCF	453	5046	0.0897741	274.652	16.4323	10.8535	1.64936	9.59e-28	7.35553e-25	DNaseI_Any
TxnFactorChIPV3	HCM	none	496	5046	0.0982957	301.086	17.998	10.8298	1.64737	1.24e-27	9.5108e-25	DNaseI_Any
TxnFactorChIPV3	GM19239	none	417	5046	0.0826397	249.322	15.5185	10.8051	1.67254	1.63e-27	1.25021e-24	DNaseI_Any
TxnFactorChIPV3	HPF	none	447	5046	0.088585	271.732	16.42	10.674	1.645	6.71e-27	5.14657e-24	DNaseI_Any
TxnFactorChIPV3	GM19239	CTCF	417	5046	0.0826397	249.409	15.7207	10.6606	1.67196	7.76e-27	5.95192e-24	DNaseI_Any
TxnFactorChIPV3	HPF	CTCF	447	5046	0.088585	271.799	16.5431	10.5906	1.6446	1.64e-26	1.25788e-23	DNaseI_Any
BroadChromHMM	NHEK	WeakPromoter	298	5046	0.0590567	162.912	12.8023	10.5519	1.82921	2.49e-26	1.90983e-23	DNaseI_Any
BroadChromHMM	GM12878	WeakPromoter	359	5046	0.0711455	204.489	14.6451	10.5504	1.7556	2.53e-26	1.94051e-23	DNaseI_Any
TxnFactorChIPV3	HMEC	CTCF	512	5046	0.101467	323.814	17.9446	10.4871	1.58115	4.95e-26	3.79665e-23	DNaseI_Any
UMMSBrainHist	Brain_prefrontal_cortex	none	405	5046	0.0802616	235.951	16.1254	10.4834	1.71646	5.14e-26	3.94238e-23	DNaseI_Any
TxnFactorChIPV3	GM12891	PAX5	66	5046	0.0130797	18.959	4.51966	10.4081	3.48119	1.14e-25	8.7438e-23	DNaseI_Any
TxnFactorChIPV3	A549	RAD21	244	5046	0.0483551	123.879	11.6845	10.2804	1.96966	4.3e-25	3.2981e-22	DNaseI_Any
TxnFactorChIPV3	GM12878	STAT1	59	5046	0.0116924	14.976	4.29155	10.2583	3.93963	5.43e-25	4.16481e-22	DNaseI_Any
TxnFactorChIPV3	GM19238	none	472	5046	0.0935394	296.284	17.1819	10.2268	1.59307	7.49e-25	5.74483e-22	DNaseI_Any
TxnFactorChIPV3	RPTEC	none	507	5046	0.100476	321.676	18.1865	10.1902	1.57612	1.09e-24	8.3603e-22	DNaseI_Any
BroadChromHMM	HSMM	WeakEnhancer	928	5046	0.183908	675.407	24.8531	10.1635	1.37399	1.44e-24	1.10448e-21	DNaseI_Any
TxnFactorChIPV3	RPTEC	CTCF	507	5046	0.100476	321.749	18.2621	10.144	1.57576	1.75e-24	1.34225e-21	DNaseI_Any
TxnFactorChIPV3	GM19238	CTCF	472	5046	0.0935394	296.405	17.3543	10.1182	1.59242	2.29e-24	1.75643e-21	DNaseI_Any
CTCF_Broad	GM12878	none	1040	5046	0.206104	769.735	27.0481	9.992	1.35111	8.26e-24	6.33542e-21	DNaseI_Any
H4K20Me1_Broad	NHDF-Ad	none	1984	5046	0.393183	1637.37	34.7234	9.98271	1.2117	9.06e-24	6.94902e-21	DNaseI_Any
OpenChromSynth	H1-hESC	none	1655	5046	0.327983	1313.4	34.2367	9.97752	1.26009	9.55e-24	7.32485e-21	DNaseI_Any
OpenChromSynth	Medullo	none	1466	5046	0.290527	1158.19	30.9318	9.95119	1.26577	1.25e-23	9.5875e-21	DNaseI_Any
BroadChromHMM	HUVEC	WeakEnhancer	744	5046	0.147444	518.76	22.6981	9.92328	1.43419	1.64e-23	1.25788e-20	DNaseI_Any
TxnFactorChIPV3	H1-hESC	NANOG	78	5046	0.0154578	25.2128	5.33382	9.89669	3.09367	2.15e-23	1.64905e-20	DNaseI_Any
TxnFactorChIPV3	HeLa-S3	CTCF	525	5046	0.104043	344.027	18.3964	9.83743	1.52604	3.88e-23	2.97596e-20	DNaseI_Any
TxnFactorChIPV3	K562	SMARCA4	57	5046	0.0112961	16.4136	4.12805	9.83187	3.47273	4.1e-23	3.1447e-20	DNaseI_Any
TxnFactorChIPV3	H1-hESC	REST	138	5046	0.0273484	59.1768	8.01958	9.82884	2.33199	4.21e-23	3.22907e-20	DNaseI_Any
TxnFactorChIPV3	AG04450	CTCF	435	5046	0.0862069	273.875	16.4064	9.82083	1.58832	4.56e-23	3.49752e-20	DNaseI_Any
TxnFactorChIPV3	GM12891	CTCF	424	5046	0.084027	260.75	16.6314	9.81575	1.62608	4.8e-23	3.6816e-20	DNaseI_Any
TxnFactorChIPV3	MCF-7+vehicle	CTCF	621	5046	0.123068	416.949	20.8607	9.7816	1.48939	6.73e-23	5.16191e-20	DNaseI_Any
CTCF_Broad	HMEC	none	785	5046	0.155569	562.684	22.7574	9.76895	1.3951	7.63e-23	5.85221e-20	DNaseI_Any
TxnFactorChIPV3	AG04450	none	435	5046	0.0862069	273.945	16.5135	9.75292	1.58791	8.94e-23	6.85698e-20	DNaseI_Any
H3K36Me3_Broad	Osteoblasts	none	1712	5046	0.339279	1379.27	34.1778	9.7353	1.24124	1.06e-22	8.1302e-20	DNaseI_Any
EZH2_Broad	NHLF	none	2495	5046	0.494451	2133.02	37.325	9.69806	1.1697	1.53e-22	1.17351e-19	DNaseI_Any
TxnFactorChIPV3	NHLF	CTCF	413	5046	0.081847	257.053	16.0903	9.69202	1.60667	1.62e-22	1.24254e-19	DNaseI_Any
BroadChromHMM	HMEC	WeakEnhancer	1051	5046	0.208284	791.803	26.7503	9.68948	1.32735	1.67e-22	1.28089e-19	DNaseI_Any
TxnFactorChIPV3	HBMEC	none	519	5046	0.102854	338.544	18.626	9.68839	1.53303	1.69e-22	1.29623e-19	DNaseI_Any
P300_KAT3B_Broad	H1-hESC	none	2646	5046	0.524376	2288.37	37.0084	9.66348	1.15628	2.15e-22	1.64905e-19	DNaseI_Any
TxnFactorChIPV3	K562	CTCF	543	5046	0.10761	367.815	18.1326	9.66129	1.47628	2.19e-22	1.67973e-19	DNaseI_Any
TxnFactorChIPV3	HBMEC	CTCF	519	5046	0.102854	339.003	18.6338	9.65973	1.53096	2.23e-22	1.71041e-19	DNaseI_Any
TxnFactorChIPV3	HEEpiC	none	419	5046	0.0830361	263.186	16.3457	9.53244	1.59203	7.65e-22	5.86755e-19	DNaseI_Any
TxnFactorChIPV3	HEEpiC	CTCF	419	5046	0.0830361	263.626	16.3544	9.50042	1.58937	1.04e-21	7.9768e-19	DNaseI_Any
H3K36Me3_Broad	NH-A	none	1691	5046	0.335117	1364.23	34.5448	9.4594	1.23953	1.55e-21	1.18885e-18	DNaseI_Any
EZH2_Broad	Dnd41	none	2643	5046	0.523781	2290.09	37.5834	9.39003	1.1541	2.99e-21	2.29333e-18	DNaseI_Any
TxnFactorChIPV3	HSMM	CTCF	445	5046	0.0881887	293.648	16.3601	9.25124	1.51542	1.11e-20	8.5137e-18	DNaseI_Any
H4K20Me1_Broad	HeLa-S3	none	1847	5046	0.366033	1544.99	32.6785	9.24179	1.19548	1.21e-20	9.2807e-18	DNaseI_Any
TxnFactorChIPV3	GM12878	BATF	246	5046	0.0487515	135.567	11.9805	9.21771	1.8146	1.51e-20	1.15817e-17	DNaseI_Any
H3K36Me3_Broad	HSMMtube	none	1944	5046	0.385256	1618.83	35.2801	9.21683	1.20087	1.52e-20	1.16584e-17	DNaseI_Any
H3K36Me3_Broad	GM12878	none	1748	5046	0.346413	1441.2	33.3704	9.19377	1.21288	1.89e-20	1.44963e-17	DNaseI_Any
TxnFactorChIPV3	GM12878	BCL11A	178	5046	0.0352755	89.4096	9.65505	9.17555	1.99084	2.25e-20	1.72575e-17	DNaseI_Any
TxnFactorChIPV3	Osteobl	CTCF	463	5046	0.0917558	304.613	17.2815	9.16511	1.51996	2.47e-20	1.89449e-17	DNaseI_Any
TxnFactorChIPV3	HVMF	CTCF	418	5046	0.0828379	271.228	16.0222	9.16053	1.54114	2.58e-20	1.97886e-17	DNaseI_Any
TxnFactorChIPV3	Osteobl	none	463	5046	0.0917558	304.381	17.4684	9.08035	1.52112	5.41e-20	4.14947e-17	DNaseI_Any
TxnFactorChIPV3	Fibrobl	none	438	5046	0.0868014	284.38	16.9327	9.07239	1.54019	5.82e-20	4.46394e-17	DNaseI_Any
TxnFactorChIPV3	HVMF	none	418	5046	0.0828379	271.205	16.1943	9.06463	1.54127	6.24e-20	4.78608e-17	DNaseI_Any
TxnFactorChIPV3	SK-N-SH_RA	CTCF	450	5046	0.0891795	296.315	16.9796	9.05119	1.51866	7.07e-20	5.42269e-17	DNaseI_Any
H3K36Me3	GM12878	none	1756	5046	0.347998	1455.6	33.2389	9.03746	1.20637	8.01e-20	6.14367e-17	DNaseI_Any
H3K36Me3_Broad	Dnd41	none	1643	5046	0.325604	1348.68	32.7168	8.99584	1.21822	1.17e-19	8.9739e-17	DNaseI_Any
TxnFactorChIPV3	Fibrobl	CTCF	438	5046	0.0868014	284.586	17.0747	8.98483	1.53908	1.29e-19	9.8943e-17	DNaseI_Any
CBP_Broad	K562	none	2630	5046	0.521205	2295.63	37.4009	8.94009	1.14565	1.94e-19	1.48798e-16	DNaseI_Any
TxnFactorChIPV3	AG09309	CTCF	399	5046	0.0790725	259.895	15.7731	8.8191	1.53523	5.76e-19	4.41792e-16	DNaseI_Any
TxnFactorChIPV3	HMF	CTCF	456	5046	0.0903686	304.228	17.2377	8.80467	1.49888	6.55e-19	5.02385e-16	DNaseI_Any
TxnFactorChIPV3	HMF	none	456	5046	0.0903686	304.435	17.2579	8.7824	1.49786	8e-19	6.136e-16	DNaseI_Any
TxnFactorChIPV3	AG09309	none	399	5046	0.0790725	259.795	15.8709	8.77108	1.53583	8.84e-19	6.78028e-16	DNaseI_Any
TxnFactorChIPV3	HUVEC	CTCF	431	5046	0.0854142	287.688	16.3881	8.74488	1.49815	1.11e-18	8.5137e-16	DNaseI_Any
TxnFactorChIPV3	HeLa-S3	BDP1	18	5046	0.00356718	2.85814	1.75324	8.63649	6.2978	2.89e-18	2.21663e-15	DNaseI_Any
H4K20Me1_Broad	HSMM	none	2238	5046	0.44352	1931.78	35.4991	8.62614	1.15852	3.17e-18	2.43139e-15	DNaseI_Any
TxnFactorChIPV3	HeLa-S3	FAM48A	28	5046	0.00554895	5.97403	2.5576	8.61197	4.68696	3.59e-18	2.75353e-15	DNaseI_Any
TxnFactorChIPV3	K562	RAD21	291	5046	0.0576694	177.261	13.2385	8.59153	1.64165	4.29e-18	3.29043e-15	DNaseI_Any
TxnFactorChIPV3	NHDF-Ad	CTCF	428	5046	0.0848197	283.173	16.8633	8.5883	1.51144	4.41e-18	3.38247e-15	DNaseI_Any
H4K20Me1_Broad	H1-hESC	none	2248	5046	0.445501	1943.29	35.5837	8.56322	1.1568	5.47e-18	4.19549e-15	DNaseI_Any
OpenChromSynth	GM12891	none	1825	5046	0.361673	1536.9	33.7322	8.54081	1.18746	6.64e-18	5.09288e-15	DNaseI_Any
TxnFactorChIPV3	HSMM	none	472	5046	0.0935394	324.833	17.2967	8.50839	1.45305	8.82e-18	6.76494e-15	DNaseI_Any
TxnFactorChIPV3	GM19240	none	411	5046	0.0814507	273.561	16.1974	8.48521	1.5024	1.07e-17	8.2069e-15	DNaseI_Any
TxnFactorChIPV3	K562	HDAC6	30	5046	0.0059453	6.89311	2.72352	8.4842	4.35217	1.08e-17	8.2836e-15	DNaseI_Any
H4K20Me1	H1-hESC	none	2248	5046	0.445501	1944.5	35.7968	8.47838	1.15608	1.14e-17	8.7438e-15	DNaseI_Any
TxnFactorChIPV3	GM19240	CTCF	411	5046	0.0814507	273.508	16.2796	8.44565	1.5027	1.51e-17	1.15817e-14	DNaseI_Any
TxnFactorChIPV3	HCFaa	none	373	5046	0.0739199	243.143	15.4341	8.41363	1.53408	1.98e-17	1.51866e-14	DNaseI_Any
TxnFactorChIPV3	HCFaa	CTCF	373	5046	0.0739199	243.268	15.4731	8.38438	1.53329	2.55e-17	1.95585e-14	DNaseI_Any
TxnFactorChIPV3	HAc	CTCF	409	5046	0.0810543	271.059	16.5649	8.32729	1.5089	4.12e-17	3.16004e-14	DNaseI_Any
TxnFactorChIPV3	HAc	none	409	5046	0.0810543	271.358	16.6135	8.28495	1.50724	5.9e-17	4.5253e-14	DNaseI_Any
TxnFactorChIPV3	HMEC	none	544	5046	0.107808	383.177	19.481	8.25538	1.41971	7.56e-17	5.79852e-14	DNaseI_Any
H4K20Me1_Broad	HepG2	none	2021	5046	0.400515	1725.67	36.1195	8.1765	1.17114	1.46e-16	1.11982e-13	DNaseI_Any
TxnFactorChIPV3	ProgFib	CTCF	394	5046	0.0780816	263.186	16.1103	8.11992	1.49704	2.33e-16	1.78711e-13	DNaseI_Any
TxnFactorChIPV3	GM12878	CTCF	495	5046	0.0980975	347.406	18.294	8.06793	1.42485	3.57e-16	2.73819e-13	DNaseI_Any
TxnFactorChIPV3	K562	BRF1	12	5046	0.00237812	1.5974	1.29721	8.01921	7.5122	5.3e-16	4.0651e-13	DNaseI_Any
TxnFactorChIPV3	K562	SMC3	213	5046	0.0422117	123.865	11.1162	8.0185	1.71961	5.34e-16	4.09578e-13	DNaseI_Any
TxnFactorChIPV3	Dnd41	none	427	5046	0.0846215	297.652	16.1605	8.00395	1.43456	6.02e-16	4.61734e-13	DNaseI_Any
BroadChromHMM	GM12878	WeakEnhancer	745	5046	0.147642	562.864	22.8119	7.98424	1.32359	7.06e-16	5.41502e-13	DNaseI_Any
BroadChromHMM	NHEK	WeakEnhancer	833	5046	0.165081	641.45	24.2112	7.91165	1.29862	1.27e-15	9.7409e-13	DNaseI_Any
OpenChromSynth	GM12892	none	1840	5046	0.364645	1572.57	33.8233	7.90657	1.17006	1.32e-15	1.01244e-12	DNaseI_Any
TxnFactorChIPV3	HSMMtube	CTCF	399	5046	0.0790725	275.797	15.6401	7.87735	1.44672	1.67e-15	1.28089e-12	DNaseI_Any
TxnFactorChIPV3	MCF-7	CTCF	565	5046	0.11197	406.933	20.1879	7.82979	1.38843	2.44e-15	1.87148e-12	DNaseI_Any
BroadChromHMM	K562	WeakPromoter	257	5046	0.0509314	159.279	12.5469	7.78847	1.61352	3.38e-15	2.59246e-12	DNaseI_Any
TxnFactorChIPV3	GM12878	POLR3G	14	5046	0.00277447	2.09391	1.53335	7.76474	6.68607	4.09e-15	3.13703e-12	DNaseI_Any
eQTLs	Any	none	242	5046	0.0479588	145.825	12.3939	7.75986	1.65952	4.25e-15	3.25975e-12	DNaseI_Any
TxnFactorChIPV3	HeLa-S3	GTF3C2	41	5046	0.00812525	12.3696	3.70206	7.73364	3.31457	5.21e-15	3.99607e-12	DNaseI_Any
TxnFactorChIPV3	GM12878	SMC3	253	5046	0.0501387	155.094	12.7062	7.70539	1.63127	6.51e-15	4.99317e-12	DNaseI_Any
TxnFactorChIPV3	GM12865	none	379	5046	0.075109	261.145	15.5032	7.60201	1.4513	1.45e-14	1.11215e-11	DNaseI_Any
TxnFactorChIPV3	HRE	CTCF	369	5046	0.0731272	250.531	15.6209	7.58396	1.47287	1.68e-14	1.28856e-11	DNaseI_Any
TxnFactorChIPV3	HRE	none	369	5046	0.0731272	250.218	15.7063	7.56273	1.47472	1.97e-14	1.51099e-11	DNaseI_Any
TxnFactorChIPV3	Gliobla	CTCF	494	5046	0.0978993	354.403	18.4685	7.55868	1.39389	2.03e-14	1.55701e-11	DNaseI_Any
TxnFactorChIPV3	Dnd41	CTCF	403	5046	0.0798652	282.263	15.9944	7.54871	1.42775	2.2e-14	1.6874e-11	DNaseI_Any
TxnFactorChIPV3	GM12865	CTCF	379	5046	0.075109	261.073	15.6408	7.53969	1.4517	2.35e-14	1.80245e-11	DNaseI_Any
H4K20Me1_Broad	NHLF	none	2129	5046	0.421918	1863.02	35.5523	7.48141	1.14277	3.67e-14	2.81489e-11	DNaseI_Any
TxnFactorChIPV3	HA-sp	none	397	5046	0.0786762	274.871	16.3729	7.45923	1.44431	4.34e-14	3.32878e-11	DNaseI_Any
EZH2_Broad	HMEC	none	2797	5046	0.5543	2541.74	34.2592	7.45077	1.10043	4.64e-14	3.55888e-11	DNaseI_Any
TxnFactorChIPV3	PANC-1	REST	80	5046	0.0158541	35.4046	6.01325	7.41619	2.25959	6.02e-14	4.61734e-11	DNaseI_Any
TxnFactorChIPV3	HA-sp	CTCF	397	5046	0.0786762	274.687	16.4995	7.41309	1.44528	6.16e-14	4.72472e-11	DNaseI_Any
TxnFactorChIPV3	GM12878	RAD21	312	5046	0.0618312	206.041	14.728	7.19441	1.51426	3.13e-13	2.40071e-10	DNaseI_Any
BroadChromHMM	GM12878	StrongEnhancer	473	5046	0.0937376	342.716	18.1287	7.1866	1.38015	3.32e-13	2.54644e-10	DNaseI_Any
TxnFactorChIPV3	HRPEpiC	CTCF	424	5046	0.084027	305.551	16.9871	6.97285	1.38766	1.55e-12	1.18885e-09	DNaseI_Any
TxnFactorChIPV3	K562	BDP1	15	5046	0.00297265	2.92607	1.74084	6.93568	5.12632	2.02e-12	1.54934e-09	DNaseI_Any
TxnFactorChIPV3	HRPEpiC	none	424	5046	0.084027	305.419	17.1242	6.92479	1.38826	2.18e-12	1.67206e-09	DNaseI_Any
TxnFactorChIPV3	K562	GTF3C2	31	5046	0.00614348	9.54845	3.10707	6.9041	3.2466	2.52e-12	1.93284e-09	DNaseI_Any
SUZ12_Broad	H1-hESC	none	2968	5046	0.588189	2718.66	36.2333	6.88154	1.09171	2.96e-12	2.27032e-09	DNaseI_Any
TxnFactorChIPV3	HFF	CTCF	304	5046	0.0602457	208.353	13.953	6.85496	1.45906	3.56e-12	2.73052e-09	DNaseI_Any
TxnFactorChIPV3	HFF	none	304	5046	0.0602457	208.397	14.041	6.80888	1.45876	4.91e-12	3.76597e-09	DNaseI_Any
TxnFactorChIPV3	WI-38	none	282	5046	0.0558859	188.901	13.8031	6.74479	1.49284	7.66e-12	5.87522e-09	DNaseI_Any
TxnFactorChIPV3	GM12864	none	381	5046	0.0755054	273.365	16.1383	6.66957	1.39374	1.28e-11	9.8176e-09	DNaseI_Any
TxnFactorChIPV3	GM12864	CTCF	381	5046	0.0755054	273.134	16.1971	6.6596	1.39492	1.37e-11	1.05079e-08	DNaseI_Any
TxnFactorChIPV3	WI-38	CTCF	282	5046	0.0558859	188.926	13.9907	6.65254	1.49265	1.44e-11	1.10448e-08	DNaseI_Any
TxnFactorChIPV3	NHLF	none	456	5046	0.0903686	335.365	18.1712	6.63881	1.35971	1.58e-11	1.21186e-08	DNaseI_Any
TxnFactorChIPV3	K562	RPC155	25	5046	0.00495442	6.86014	2.73942	6.62179	3.64424	1.77e-11	1.35759e-08	DNaseI_Any
TxnFactorChIPV3	U2OS	SETDB1	92	5046	0.0182323	46.2857	6.93947	6.58757	1.98765	2.24e-11	1.71808e-08	DNaseI_Any
TxnFactorChIPV3	GM12873	none	404	5046	0.0800634	294.618	16.6383	6.57407	1.37127	2.44e-11	1.87148e-08	DNaseI_Any
TxnFactorChIPV3	K562+IFNa30	IRF1	26	5046	0.0051526	8.02198	2.74909	6.53962	3.2411	3.08e-11	2.36236e-08	DNaseI_Any
TxnFactorChIPV3	GM12873	CTCF	404	5046	0.0800634	294.475	16.7854	6.52504	1.37194	3.4e-11	2.6078e-08	DNaseI_Any
TxnFactorChIPV3	K562	ZNF263	59	5046	0.0116924	24.8531	5.29201	6.45253	2.37394	5.49e-11	4.21083e-08	DNaseI_Any
TxnFactorChIPV3	NHDF-Ad	none	470	5046	0.0931431	350.388	18.5819	6.43703	1.34137	6.09e-11	4.67103e-08	DNaseI_Any
TxnFactorChIPV3	A549+DEX_100nM	CTCF	328	5046	0.065002	230.451	15.23	6.4051	1.4233	7.51e-11	5.76017e-08	DNaseI_Any
TxnFactorChIPV3	HeLa-S3	RPC155	35	5046	0.00693619	12.1339	3.57911	6.38877	2.88449	8.36e-11	6.41212e-08	DNaseI_Any
H4K20Me1_Broad	NHEK	none	2094	5046	0.414982	1876.56	34.1152	6.37363	1.11587	9.21e-11	7.06407e-08	DNaseI_Any
CTCF_Broad	H1-hESC	none	888	5046	0.175981	721.683	26.1511	6.35982	1.23046	1.01e-10	7.7467e-08	DNaseI_Any
TxnFactorChIPV3	A549+EtOH_0.02pct	CTCF	311	5046	0.061633	220.797	14.6595	6.15321	1.40853	3.79e-10	2.90693e-07	DNaseI_Any
EZH2_Broad	HepG2	none	2497	5046	0.494847	2275.54	36.1591	6.12458	1.09732	4.54e-10	3.48218e-07	DNaseI_Any
TxnFactorChIPV3	T-47D+DMSO_0.02pct	CTCF	249	5046	0.049346	171.084	12.8125	6.08124	1.45543	5.95e-10	4.56365e-07	DNaseI_Any
TxnFactorChIPV3	HSMMtube	none	424	5046	0.084027	321.702	17.0415	6.00285	1.31799	9.67e-10	7.41689e-07	DNaseI_Any
TxnFactorChIPV3	GM06990	none	360	5046	0.0713436	264.298	15.9936	5.98379	1.3621	1.09e-09	8.3603e-07	DNaseI_Any
TxnFactorChIPV3	BE2_C	CTCF	395	5046	0.0782798	298.853	16.1215	5.96391	1.32172	1.23e-09	9.4341e-07	DNaseI_Any
TxnFactorChIPV3	GM06990	CTCF	360	5046	0.0713436	264.261	16.116	5.94062	1.36229	1.42e-09	1.08914e-06	DNaseI_Any
TxnFactorChIPV3	BE2_C	none	395	5046	0.0782798	299.132	16.1398	5.93987	1.32049	1.43e-09	1.09681e-06	DNaseI_Any
TxnFactorChIPV3	HFF-Myc	none	344	5046	0.0681728	254.86	15.098	5.9041	1.34976	1.77e-09	1.35759e-06	DNaseI_Any
TxnFactorChIPV3	HFF-Myc	CTCF	344	5046	0.0681728	254.889	15.1293	5.88997	1.34961	1.93e-09	1.48031e-06	DNaseI_Any
TxnFactorChIPV3	GM12875	none	323	5046	0.0640111	235.423	15.0141	5.833	1.372	2.72e-09	2.08624e-06	DNaseI_Any
TxnFactorChIPV3	H1-hESC	RAD21	441	5046	0.087396	335.454	18.2341	5.78841	1.31464	3.54e-09	2.71518e-06	DNaseI_Any
TxnFactorChIPV3	GM12875	CTCF	323	5046	0.0640111	235.301	15.175	5.7792	1.37271	3.75e-09	2.87625e-06	DNaseI_Any
PLU1_Broad	H1-hESC	none	3018	5046	0.598098	2808.6	36.4779	5.74051	1.07456	4.71e-09	3.61257e-06	DNaseI_Any
HDAC6_Broad	H1-hESC	none	2916	5046	0.577883	2714.46	35.2573	5.71616	1.07425	5.44e-09	4.17248e-06	DNaseI_Any
TxnFactorChIPV3	GM12872	none	361	5046	0.0715418	273.497	15.3253	5.70975	1.31994	5.65e-09	4.33355e-06	DNaseI_Any
TxnFactorChIPV3	MCF-7+estrogen	CTCF	452	5046	0.0895759	344.932	18.8668	5.67493	1.3104	6.93e-09	5.31531e-06	DNaseI_Any
TxnFactorChIPV3	GM12872	CTCF	361	5046	0.0715418	273.408	15.4906	5.65456	1.32037	7.8e-09	5.9826e-06	DNaseI_Any
EZH2_Broad	NHDF-Ad	none	1583	5046	0.313714	1394.95	33.6592	5.58686	1.13481	1.15e-08	8.8205e-06	DNaseI_Any
H3K36Me3	Monocytes-CD14+_RO01746	none	1331	5046	0.263773	1162.25	30.2288	5.58233	1.14519	1.19e-08	9.1273e-06	DNaseI_Any
H3K36Me3_Broad	Monocytes-CD14+_RO01746	none	1331	5046	0.263773	1162.7	30.2483	5.5641	1.14475	1.32e-08	1.01244e-05	DNaseI_Any
CBX3_Broad	K562	none	2373	5046	0.470273	2179.28	36.3977	5.32226	1.08889	5.12e-08	3.92704e-05	DNaseI_Any
TxnFactorChIPV3	GM12874	none	304	5046	0.0602457	227.011	14.585	5.27866	1.33914	6.5e-08	4.9855e-05	DNaseI_Any
TxnFactorChIPV3	H1-hESC	POU5F1	38	5046	0.00753072	16.011	4.17144	5.27133	2.37337	6.76e-08	5.18492e-05	DNaseI_Any
TxnFactorChIPV3	GM12874	CTCF	304	5046	0.0602457	226.89	14.6412	5.26665	1.33986	6.94e-08	5.32298e-05	DNaseI_Any
TxnFactorChIPV3	K562	BRF2	12	5046	0.00237812	3.005	1.72539	5.21331	3.99335	9.26e-08	7.10242e-05	DNaseI_Any
H4K20Me1	GM12878	none	2493	5046	0.494055	2303.31	36.6779	5.17184	1.08236	1.16e-07	8.8972e-05	DNaseI_Any
H4K20Me1_Broad	GM12878	none	2493	5046	0.494055	2301.98	36.9477	5.1699	1.08298	1.17e-07	8.9739e-05	DNaseI_Any
TxnFactorChIPV3	K562	POLR3G	10	5046	0.00198177	2.2038	1.51077	5.16042	4.53762	1.23e-07	9.4341e-05	DNaseI_Any
TxnFactorChIPV3	H1-hESC	BCL11A	27	5046	0.00535077	10.4745	3.27316	5.04878	2.57768	2.22e-07	0.000170274	DNaseI_Any
TxnFactorChIPV3	NH-A	CTCF	294	5046	0.058264	220.539	14.8704	4.94005	1.33309	3.9e-07	0.00029913	DNaseI_Any
TxnFactorChIPV3	HCT-116	CTCF	353	5046	0.0699564	276.984	16.2934	4.66546	1.27444	1.54e-06	0.00118118	DNaseI_Any
H3K4Me1_SYDH	NT2-D1	none	242	5046	0.0479588	181.074	13.4032	4.54563	1.33647	2.73e-06	0.00209391	DNaseI_Any
TxnFactorChIPV3	HL-60	none	145	5046	0.0287356	100.429	9.81444	4.54142	1.44381	2.79e-06	0.00213993	DNaseI_Any
TxnFactorChIPV3	HL-60	CTCF	145	5046	0.0287356	100.589	9.78807	4.53722	1.4415	2.84e-06	0.00217828	DNaseI_Any
EZH2_Broad	CD20+_RO01794	none	1867	5046	0.369996	1720.17	33.5533	4.37611	1.08536	6.03e-06	0.00462501	DNaseI_Any
TxnFactorChIPV3	HEK293	CTCF	337	5046	0.0667856	267.116	16.0554	4.3527	1.26162	6.72e-06	0.00515424	DNaseI_Any
TxnFactorChIPV3	WERI-Rb-1	CTCF	358	5046	0.0709473	286.936	16.5831	4.28532	1.24766	9.11e-06	0.00698737	DNaseI_Any
TxnFactorChIPV3	WERI-Rb-1	none	358	5046	0.0709473	286.814	16.6684	4.27071	1.24819	9.74e-06	0.00747058	DNaseI_Any
TxnFactorChIPV3	K562	ZNF274	22	5046	0.00435989	9.23576	3.00738	4.2443	2.38204	1.1e-05	0.008437	DNaseI_Any
H3K9Me3	K562	none	1421	5046	0.281609	1300.37	30.1526	4.0006	1.09276	3.16e-05	0.0242372	DNaseI_Any
EZH2_Broad	NHEK	none	2021	5046	0.400515	1883.35	34.8273	3.95243	1.07309	3.86e-05	0.0296062	DNaseI_Any
TxnFactorChIPV3	GM12801	none	34	5046	0.00673801	18.021	4.09641	3.90074	1.88669	4.79e-05	0.0367393	DNaseI_Any
TxnFactorChIPV3	GM12801	CTCF	34	5046	0.00673801	18.0539	4.12372	3.86691	1.88324	5.5e-05	0.042185	DNaseI_Any
H3K9Me3_Broad	K562	none	1421	5046	0.281609	1299.78	31.5142	3.84639	1.09326	5.99e-05	0.0459433	DNaseI_Any
H4K20Me1	K562	none	2698	5046	0.534681	2563.8	35.7385	3.75502	1.05234	8.66e-05	0.0664222	DNaseI_Any
EZH2_Broad	HSMMtube	none	1114	5046	0.220769	1012.68	27.456	3.6904	1.10006	0.000111952	0.0858672	DNaseI_Any
H4K20Me1_Broad	K562	none	2698	5046	0.534681	2564.12	36.6593	3.65212	1.05221	0.0001299	0.0996333	DNaseI_Any
H4K20Me1_Broad	HMEC	none	2208	5046	0.437574	2083.46	34.3399	3.62675	1.05978	0.000143476	0.110046	DNaseI_Any
TxnFactorChIPV3	NB4	CTCF	271	5046	0.0537059	219.591	14.4036	3.56915	1.23411	0.000179036	0.137321	DNaseI_Any
TxnFactorChIPV3	ECC-1+DMSO_0.02pct	CTCF	174	5046	0.0344828	134.8	11.3524	3.45298	1.2908	0.000276987	0.212449	DNaseI_Any
TxnFactorChIPV3	HeLa-S3	BRF2	4	5046	0.000792707	0.86014	0.940436	3.33873	4.65041	0.000420707	0.322682	DNaseI_Any
TxnFactorChIPV3	GM12878	ZZZ3	10	5046	0.00198177	3.75425	1.91978	3.25337	2.66365	0.000569757	0.437004	DNaseI_Any
H3K27Me3_Broad	Dnd41	none	2307	5046	0.457194	2189.16	36.364	3.24055	1.05383	0.000595978	0.457115	DNaseI_Any
TxnFactorChIPV3	H1-hESC	CTCF	436	5046	0.0864051	376.477	18.4107	3.23309	1.15811	0.000612054	0.469445	DNaseI_Any
H4K20Me1_Broad	A549	none	2414	5046	0.478399	2296.74	36.8657	3.18076	1.05106	0.000734345	0.563243	DNaseI_Any
H3K36Me3	H1-hESC	none	1354	5046	0.268331	1254.45	31.4614	3.16418	1.07936	0.000777016	0.595971	DNaseI_Any
H4K20Me1_Broad	Dnd41	none	2402	5046	0.476021	2291.03	35.3904	3.13551	1.04844	0.000857512	0.657712	DNaseI_Any
H3K36Me3_Broad	H1-hESC	none	1354	5046	0.268331	1256.63	31.496	3.09156	1.07749	0.000995405	0.763476	DNaseI_Any
TxnFactorChIPV3	Dnd41	EZH2	32	5046	0.00634166	18.971	4.25231	3.06397	1.68678	0.00109199	0.837556	DNaseI_Any
VistaEnhancers	Any	none	17	5046	0.00336901	8.52947	2.88121	2.93992	1.99309	0.00164106	1	DNaseI_Any
TxnFactorChIPV3	NH-A	none	347	5046	0.0687673	299.335	17.3455	2.748	1.15924	0.00299434	1	DNaseI_Any
eQTLs	MRCA	none	388	5046	0.0768926	338.199	18.1408	2.74526	1.14725	0.00302002	1	DNaseI_Any
BroadChromHMM	K562	PoisedPromoter	57	5046	0.0112961	40.8921	6.3005	2.5566	1.39391	0.005282	1	DNaseI_Any
TxnFactorChIPV3	HeLa-S3	BRF1	4	5046	0.000792707	1.18981	1.11979	2.50956	3.36188	0.0060434	1	DNaseI_Any
eQTLs	MRCE	none	443	5046	0.0877923	403.807	18.707	2.09509	1.09706	0.0180766	1	DNaseI_Any
TxnFactorChIPV3	GM12878	IKZF1	71	5046	0.0140706	57.3267	7.55422	1.81003	1.23852	0.0351169	1	DNaseI_Any
TxnFactorChIPV3	HeLa-S3	ZZZ3	3	5046	0.00059453	1.23676	1.10855	1.59058	2.42569	0.0558273	1	DNaseI_Any
CBX8_Broad	K562	none	1025	5046	0.203131	982.577	27.8029	1.52583	1.04317	0.0635049	1	DNaseI_Any
TxnFactorChIPV3	K562+MNaseD	none	11	5046	0.00217994	7.09291	2.76737	1.41184	1.55085	0.078975	1	DNaseI_Any
TxnFactorChIPV3	K562+MNaseD	SETDB1	11	5046	0.00217994	7.0989	2.77474	1.40593	1.54954	0.0798621	1	DNaseI_Any
TxnFactorChIPV3	SH-SY5Y	GATA3	63	5046	0.0124851	55.4406	7.32084	1.03259	1.13635	0.150849	1	DNaseI_Any
TxnFactorChIPV3	GM12878	EZH2	42	5046	0.00832342	36.2048	5.80715	0.997943	1.16007	0.15914	1	DNaseI_Any
BroadChromHMM	GM12878	PoisedPromoter	73	5046	0.0144669	66.0689	7.9138	0.87582	1.10491	0.190515	1	DNaseI_Any
SUZ12_Broad	K562	none	1564	5046	0.309948	1539.29	33.1354	0.745646	1.01605	0.227834	1	DNaseI_Any
CBX2_Broad	K562	none	1152	5046	0.2283	1155.24	29.545	-0.109689	0.997195	0.456205	1	DNaseI_Any
H3K27Me3	GM12878	none	2352	5046	0.466112	2356.57	36.4633	-0.125398	0.99806	0.450024	1	DNaseI_Any
TxnFactorChIPV3	HeLa-S3	EZH2	7	5046	0.00138724	7.48452	2.74263	-0.176661	0.935264	0.429833	1	DNaseI_Any
H3K27Me3_UW	K562	none	5	5046	0.000990884	5.42557	2.31575	-0.183774	0.921561	0.427007	1	DNaseI_Any
H3K27Me3_Broad	GM12878	none	2343	5046	0.464328	2350.18	35.5286	-0.202226	0.996943	0.419802	1	DNaseI_Any
TxnFactorChIPV3	K562	KAP1	10	5046	0.00198177	10.8012	3.33458	-0.24027	0.925823	0.40501	1	DNaseI_Any
H3K36Me3_UW	K562	none	107	5046	0.0212049	109.626	10.1024	-0.259975	0.976043	0.397432	1	DNaseI_Any
H3K27Me3_UW	GM12878	none	118	5046	0.0233849	121.856	10.8609	-0.355048	0.968355	0.36122	1	DNaseI_Any
TxnFactorChIPV3	Akata	none	28	5046	0.00554895	30.3017	5.3793	-0.42788	0.924041	0.334326	1	DNaseI_Any
TxnFactorChIPV3	Akata	Zta	28	5046	0.00554895	30.2957	5.33896	-0.429991	0.924223	0.333598	1	DNaseI_Any
H3K36Me3_UW	SAEC	none	184	5046	0.0364645	189.997	13.5304	-0.443223	0.968436	0.328666	1	DNaseI_Any
H3K36Me3_UW	Caco-2	none	29	5046	0.00574713	32.3477	5.82108	-0.575091	0.89651	0.282578	1	DNaseI_Any
H3K27Me3_UW	GM06990	none	68	5046	0.013476	73.048	8.30974	-0.607474	0.930895	0.271726	1	DNaseI_Any
H3K27Me3	GM06990	none	68	5046	0.013476	73.3576	8.34853	-0.641747	0.926965	0.260437	1	DNaseI_Any
H3K36Me3_UW	HRE	none	31	5046	0.00614348	34.7283	5.73551	-0.650033	0.892644	0.257717	1	DNaseI_Any
TxnFactorChIPV3	K562	EZH2	13	5046	0.0025763	15.6374	3.9874	-0.661424	0.831342	0.254114	1	DNaseI_Any
TxnFactorChIPV3	HeLa-S3	ZNF274	0	5046	0	0.477522	0.71676	-0.666224	0	0.252578	1	DNaseI_Any
TxnFactorChIPV3	HSMM	EZH2	29	5046	0.00574713	33.7423	5.66299	-0.837412	0.859456	0.201128	1	DNaseI_Any
TxnFactorChIPV3	HepG2	ZNF274	0	5046	0	0.805195	0.872361	-0.923007	0	0.177951	1	DNaseI_Any
TxnFactorChIPV3	GM12878	ZNF274	0	5046	0	0.879121	0.942536	-0.932719	0	0.175462	1	DNaseI_Any
H3K36Me3_UW	HeLa-S3	none	44	5046	0.00871978	51.4745	7.0417	-1.06147	0.854792	0.144209	1	DNaseI_Any
TxnFactorChIPV3	GM12878	JUND	9	5046	0.00178359	13.1419	3.6943	-1.12115	0.684835	0.131101	1	DNaseI_Any
TxnFactorChIPV3	GM08714	ZNF274	0	5046	0	1.3976	1.21892	-1.1466	0	0.125732	1	DNaseI_Any
TxnFactorChIPV3	GM08714	none	0	5046	0	1.40959	1.21986	-1.15553	0	0.123922	1	DNaseI_Any
TxnFactorChIPV3	NT2-D1	ZNF274	0	5046	0	1.59441	1.23342	-1.29267	0	0.0980401	1	DNaseI_Any
H3K27Me3_UW	HMEC	none	15	5046	0.00297265	21.4476	4.70207	-1.37121	0.699381	0.085094	1	DNaseI_Any
H3K36Me3_UW	GM12878	none	173	5046	0.0342846	194.594	14.2267	-1.51788	0.889029	0.0645072	1	DNaseI_Any
BroadChromHMM	NHLF	PoisedPromoter	48	5046	0.00951249	60.7273	7.7012	-1.65263	0.790419	0.0491858	1	DNaseI_Any
H3K36Me3_UW	NHEK	none	141	5046	0.0279429	161.776	12.2166	-1.70065	0.871574	0.0444903	1	DNaseI_Any
H3K27Me3_UW	Caco-2	none	16	5046	0.00317083	24.973	5.09296	-1.76185	0.640691	0.0390346	1	DNaseI_Any
EZH2_Broad	HeLa-S3	none	1773	5046	0.351367	1833.85	33.9751	-1.79093	0.96682	0.0366306	1	DNaseI_Any
BroadChromHMM	HUVEC	PoisedPromoter	61	5046	0.0120888	77.4276	8.62293	-1.9051	0.787833	0.028377	1	DNaseI_Any
BroadChromHMM	HepG2	PoisedPromoter	58	5046	0.0114943	74.5654	8.39428	-1.97342	0.77784	0.0242136	1	DNaseI_Any
H3K36Me3_UW	HUVEC	none	232	5046	0.045977	264.294	16.0058	-2.01763	0.877811	0.0217956	1	DNaseI_Any
H3K27Me3	PBMC	none	325	5046	0.0644075	362.376	18.3665	-2.03499	0.896859	0.0209154	1	DNaseI_Any
H3K27Me3_SYDH	PBMC	none	325	5046	0.0644075	362.83	17.5781	-2.15211	0.895736	0.0156829	1	DNaseI_Any
H3K27Me3_Broad	NH-A	none	1548	5046	0.306778	1630.61	33.2287	-2.48615	0.949337	0.00645214	1	DNaseI_Any
H3K36Me3_SYDH	NT2-D1	none	447	5046	0.088585	502.398	21.9291	-2.52621	0.889734	0.00576191	1	DNaseI_Any
H3K27Me3_SYDH	MCF-7	none	44	5046	0.00871978	65.1419	8.24475	-2.56428	0.675449	0.00516772	1	DNaseI_Any
BroadChromHMM	HSMM	PoisedPromoter	41	5046	0.00812525	60.8751	7.57201	-2.62481	0.67351	0.0043299	1	DNaseI_Any
H3K36Me3_UW	SK-N-SH_RA	none	63	5046	0.0124851	87.1798	9.16011	-2.63969	0.722644	0.0041453	1	DNaseI_Any
H3K36Me3_UW	GM06990	none	167	5046	0.0330955	204.338	13.7818	-2.7092	0.817275	0.00336822	1	DNaseI_Any
H3K36Me3	GM06990	none	167	5046	0.0330955	205.016	14.0161	-2.7123	0.814571	0.0033399	1	DNaseI_Any
BroadChromHMM	H1-hESC	PoisedPromoter	176	5046	0.0348791	215.658	14.4826	-2.73835	0.816106	0.00308695	1	DNaseI_Any
TxnFactorChIPV3	NT2-D1	SUZ12	16	5046	0.00317083	32.3387	5.88865	-2.7746	0.494764	0.00276178	1	DNaseI_Any
TxnFactorChIPV3	NH-A	EZH2	57	5046	0.0112961	83.4725	9.37558	-2.82356	0.682859	0.00237438	1	DNaseI_Any
H3K9Me3_Broad	HeLa-S3	none	1484	5046	0.294094	1576.86	32.6418	-2.84467	0.941114	0.00222197	1	DNaseI_Any
H3K27Me3_UW	SK-N-SH_RA	none	106	5046	0.0210067	139.623	11.8022	-2.8489	0.759185	0.00219147	1	DNaseI_Any
BroadChromHMM	NHEK	PoisedPromoter	66	5046	0.0130797	94.7712	9.69116	-2.96881	0.696414	0.00149288	1	DNaseI_Any
H3K27Me3_UW	NHEK	none	22	5046	0.00435989	40.7642	6.16963	-3.04139	0.539689	0.00117662	0.902468	DNaseI_Any
H3K27Me3_Broad	HUVEC	none	1356	5046	0.268728	1455.5	32.1062	-3.09898	0.931641	0.00097022	0.744159	DNaseI_Any
TxnFactorChIPV3	HSMMtube	EZH2	27	5046	0.00535077	49.1359	7.06311	-3.13401	0.549497	0.000861033	0.660412	DNaseI_Any
TxnFactorChIPV3	NHDF-Ad	EZH2	46	5046	0.00911613	72.9051	8.40309	-3.20181	0.630957	0.000682386	0.52339	DNaseI_Any
H3K27Me3_UW	Monocytes-CD14+_RO01746	none	218	5046	0.0432025	269.921	16.16	-3.21293	0.807643	0.000656327	0.503403	DNaseI_Any
H3K27Me3	HUVEC	none	1368	5046	0.271106	1477.72	33.3456	-3.29025	0.925753	0.00050023	0.383676	DNaseI_Any
H3K36Me3_UW	H7-hESC	none	146	5046	0.0289338	191.084	13.5928	-3.31674	0.764062	0.000455271	0.349193	DNaseI_Any
H3K9Me3	GM12878	none	968	5046	0.191835	1067.82	28.8128	-3.46437	0.906521	0.000265705	0.203796	DNaseI_Any
H3K27Me3_UW	BJ	none	108	5046	0.0214031	151.491	12.4961	-3.48033	0.712916	0.000250334	0.192006	DNaseI_Any
H3K9Me3_Broad	GM12878	none	968	5046	0.191835	1068.85	28.4946	-3.53931	0.905645	0.000200369	0.153683	DNaseI_Any
BroadChromHMM	HMEC	PoisedPromoter	31	5046	0.00614348	58.1479	7.60593	-3.5693	0.533124	0.000178764	0.137112	DNaseI_Any
TxnFactorChIPV3	HMEC	EZH2	34	5046	0.00673801	64.8162	8.17142	-3.77121	0.52456	8.11e-05	0.0622037	DNaseI_Any
H3K36Me3_UW	BJ	none	149	5046	0.0295283	202.097	13.8362	-3.83752	0.73727	6.21e-05	0.0476307	DNaseI_Any
H3K9Me3_SYDH	MCF-7	none	1	5046	0.000198177	16.3886	3.96583	-3.8803	0.061018	5.21e-05	0.0399607	DNaseI_Any
TxnFactorChIPV3	H1-hESC	SUZ12	11	5046	0.00217994	32.7612	5.57009	-3.9068	0.335763	4.68e-05	0.0358956	DNaseI_Any
H3K9Me3	PBMC	none	3	5046	0.00059453	20.978	4.58318	-3.92261	0.143007	4.38e-05	0.0335946	DNaseI_Any
H3K9Me3_SYDH	PBMC	none	3	5046	0.00059453	21.02	4.4944	-4.00943	0.142721	3.04e-05	0.0233168	DNaseI_Any
H3K27Me3_UW	H7-hESC	none	248	5046	0.0491478	318.063	17.1274	-4.09068	0.77972	2.15e-05	0.0164905	DNaseI_Any
TxnFactorChIPV3	NHLF	EZH2	46	5046	0.00911613	84.963	9.37217	-4.15731	0.541412	1.61e-05	0.0123487	DNaseI_Any
H3K27Me3_Broad	NHDF-Ad	none	1587	5046	0.314507	1725.96	33.4144	-4.1588	0.919486	1.6e-05	0.012272	DNaseI_Any
H3K27Me3_UW	AG04450	none	57	5046	0.0112961	95.8591	9.32079	-4.16908	0.594622	1.53e-05	0.0117351	DNaseI_Any
TxnFactorChIPV3	HepG2	EZH2	16	5046	0.00317083	45.8142	7.01623	-4.24932	0.349237	1.07e-05	0.0082069	DNaseI_Any
H3K36Me3_UW	HepG2	none	89	5046	0.0176377	138.294	11.5862	-4.25452	0.643558	1.05e-05	0.0080535	DNaseI_Any
TxnFactorChIPV3	HUVEC	EZH2	40	5046	0.00792707	78.8022	8.85544	-4.38174	0.5076	5.88e-06	0.00450996	DNaseI_Any
TxnFactorChIPV3	H1-hESC	EZH2	37	5046	0.00733254	74.8392	8.39685	-4.50635	0.494394	3.3e-06	0.0025311	DNaseI_Any
H3K27Me3_SYDH	NT2-D1	none	237	5046	0.0469679	316.032	17.3989	-4.54234	0.749924	2.78e-06	0.00213226	DNaseI_Any
H3K27Me3	H1-hESC	none	808	5046	0.160127	936.547	27.3924	-4.69281	0.862743	1.34e-06	0.00102778	DNaseI_Any
H3K27Me3_Broad	H1-hESC	none	808	5046	0.160127	937.274	27.5251	-4.69658	0.862075	1.32e-06	0.00101244	DNaseI_Any
TxnFactorChIPV3	NHEK	EZH2	46	5046	0.00911613	91.977	9.75174	-4.71475	0.500125	1.21e-06	0.00092807	DNaseI_Any
H3K27Me3_Broad	Monocytes-CD14+_RO01746	none	1073	5046	0.212644	1222.23	31.3248	-4.76411	0.8779	9.47e-07	0.000726349	DNaseI_Any
H3K27Me3	Monocytes-CD14+_RO01746	none	1073	5046	0.212644	1220.06	30.697	-4.79056	0.879468	8.31e-07	0.000637377	DNaseI_Any
H3K36Me3_SYDH	MCF-7	none	110	5046	0.0217994	172.979	13.0106	-4.84061	0.635915	6.47e-07	0.000496249	DNaseI_Any
H3K27Me3_UW	SAEC	none	98	5046	0.0194213	159.661	12.638	-4.87902	0.613799	5.33e-07	0.000408811	DNaseI_Any
H3K27Me3_UW	HUVEC	none	197	5046	0.0390408	274.874	15.6697	-4.96972	0.716692	3.35e-07	0.000256945	DNaseI_Any
H3K9Me3_Broad	A549	none	1025	5046	0.203131	1180.73	30.6382	-5.08292	0.868106	1.86e-07	0.000142662	DNaseI_Any
H3K27Me3_Broad	NHLF	none	1470	5046	0.29132	1656.69	34.2776	-5.44634	0.887313	2.57e-08	1.97119e-05	DNaseI_Any
H3K36Me3_SYDH	U2OS	none	360	5046	0.0713436	475.907	21.2774	-5.44742	0.75645	2.55e-08	1.95585e-05	DNaseI_Any
H3K9Me3_Broad	NH-A	none	1519	5046	0.301031	1710.61	35.085	-5.46138	0.887986	2.36e-08	1.81012e-05	DNaseI_Any
H3K27Me3_UW	HepG2	none	19	5046	0.00376536	64.5015	7.98663	-5.69721	0.294567	6.08e-09	4.66336e-06	DNaseI_Any
H3K27Me3_Broad	Osteoblasts	none	1566	5046	0.310345	1762.01	34.2432	-5.7242	0.888755	5.19e-09	3.98073e-06	DNaseI_Any
H3K27Me3_Broad	HSMM	none	1480	5046	0.293302	1715.74	35.7477	-6.59467	0.862599	2.13e-11	1.63371e-08	DNaseI_Any
H3K9Me3_Broad	HSMM	none	1632	5046	0.323424	1877.49	35.6086	-6.89411	0.869246	2.7e-12	2.0709e-09	DNaseI_Any
H3K27Me3_UW	HRE	none	157	5046	0.0311138	268.91	16.1862	-6.91391	0.583838	2.36e-12	1.81012e-09	DNaseI_Any
H3K27Me3_Broad	HepG2	none	2131	5046	0.422315	2389.38	36.5797	-7.0635	0.891863	8.11e-13	6.22037e-10	DNaseI_Any
H3K27Me3_Broad	K562	none	1694	5046	0.335711	1953.69	36.0308	-7.20744	0.867077	2.85e-13	2.18595e-10	DNaseI_Any
H3K27Me3	K562	none	1721	5046	0.341062	1998.36	37.0423	-7.48768	0.861206	3.5e-14	2.6845e-11	DNaseI_Any
H3K9Me3_SYDH	NT2-D1	none	50	5046	0.00990884	139.785	11.6272	-7.72197	0.357692	5.73e-15	4.39491e-12	DNaseI_Any
H3K9Me3	H1-hESC	none	519	5046	0.102854	718.475	25.6664	-7.77181	0.722364	3.86e-15	2.96062e-12	DNaseI_Any
H3K9Me3_SYDH	U2OS	none	21	5046	0.00416171	103.566	10.3355	-7.98865	0.202768	6.81e-16	5.22327e-13	DNaseI_Any
H3K9Me3_Broad	H1-hESC	none	519	5046	0.102854	719.255	24.9006	-8.04216	0.72158	4.4e-16	3.3748e-13	DNaseI_Any
H3K27Me3_SYDH	K562	none	422	5046	0.0836306	617.756	23.843	-8.21021	0.683117	1.1e-16	8.437e-14	DNaseI_Any
H3K9Me3_Broad	Dnd41	none	451	5046	0.0893777	655.308	23.9664	-8.52476	0.688226	7.65e-18	5.86755e-15	DNaseI_Any
H3K9Me3_UW	AG04450	none	167	5046	0.0330955	312.852	17.0124	-8.57331	0.533798	5.02e-18	3.85034e-15	DNaseI_Any
H3K9Me3_Broad	NHDF-Ad	none	794	5046	0.157352	1060.54	30.5069	-8.73703	0.748676	1.19e-18	9.1273e-16	DNaseI_Any
H3K9Me3_Broad	HSMMtube	none	1366	5046	0.270709	1676.35	34.9938	-8.86861	0.814867	3.7e-19	2.8379e-16	DNaseI_Any
H3K9Me3_Broad	NHLF	none	794	5046	0.157352	1091.59	30.445	-9.77471	0.727378	7.22e-23	5.53774e-20	DNaseI_Any
H3K27Me3_Broad	HSMMtube	none	1759	5046	0.348593	2139.06	37.9789	-10.0072	0.822323	7.09e-24	5.43803e-21	DNaseI_Any
H3K9Me3_Broad	HepG2	none	212	5046	0.0420135	426.996	20.5959	-10.4388	0.496492	8.24e-26	6.32008e-23	DNaseI_Any
H3K27Me3_Broad	NHEK	none	1125	5046	0.222949	1513.44	35.3892	-10.9762	0.743341	2.48e-28	1.90216e-25	DNaseI_Any
H3K27Me3_Broad	HMEC	none	942	5046	0.186683	1309.84	32.9438	-11.1656	0.719173	3e-29	2.301e-26	DNaseI_Any
H3K9Me3	Monocytes-CD14+_RO01746	none	300	5046	0.059453	642.292	26.614	-12.8613	0.467077	3.7e-38	2.8379e-35	DNaseI_Any
H3K27Me3_Broad	A549	none	1094	5046	0.216805	1595.99	38.1394	-13.162	0.685467	7.22e-40	5.53774e-37	DNaseI_Any
H3K9Me3_Broad	Monocytes-CD14+_RO01746	none	300	5046	0.059453	641.382	25.8208	-13.2212	0.46774	3.29e-40	2.52343e-37	DNaseI_Any
H3K9Me3_Broad	Osteoblasts	none	449	5046	0.0889814	844.467	29.7833	-13.2781	0.531697	1.54e-40	1.18118e-37	DNaseI_Any
H3K27Me3_Broad	HeLa-S3	none	1070	5046	0.212049	1639.77	38.958	-14.6251	0.652532	9.7e-49	7.4399e-46	DNaseI_Any
H3K9Me3_Broad	HUVEC	none	274	5046	0.0543004	687.162	27.3164	-15.125	0.398742	5.52e-52	4.23384e-49	DNaseI_Any
H3K9Me3	HUVEC	none	274	5046	0.0543004	686.187	27.2193	-15.1432	0.399308	4.2e-52	3.2214e-49	DNaseI_Any
H3K9Me3_Broad	HMEC	none	233	5046	0.0461752	666.992	27.4545	-15.8077	0.34933	1.37e-56	1.05079e-53	DNaseI_Any
H3K9Me3_Broad	NHEK	none	307	5046	0.0608403	832.561	30.7468	-17.0932	0.368742	8.34e-66	6.39678e-63	DNaseI_Any

## Sheet: HumanOnlyCRM_vs_ENCODE
Track	CellLine	Transcription Factor	Overlap	Total Hits	Ratio	Mean	SD	Zscore(abs)	Enrichment	p-value	Corrected p-value	Null Model
Pazar_Chip	liver_GSE25836	FOXA2	2523	19461	0.129644	113.16	76.942	31.3202	22.2959	1.2382e-215	2.83052e-212	Null_Model_OpenChrom
Pazar_Chip	liver_GSE25836	none	2523	19461	0.129644	112.968	76.9762	31.3088	22.3338	1.77173e-215	4.05017e-212	Null_Model_OpenChrom
TxnFactorChIPV3	HepG2	HNF4A	3793	19461	0.194903	321.479	111.266	31.2002	11.7986	5.28672e-214	1.20855e-210	Null_Model_OpenChrom
TxnFactorChIPV3	HepG2	FOXA2	5092	19461	0.261652	553.393	145.56	31.1804	9.20142	9.82259e-214	2.24544e-210	Null_Model_OpenChrom
TxnFactorChIPV3	HepG2	HNF4G	3568	19461	0.183341	320.505	104.229	31.1574	11.1324	2.01624e-213	4.60912e-210	Null_Model_OpenChrom
TxnFactorChIPV3	HepG2	CEBPB	5336	19461	0.274189	645.046	150.628	31.1425	8.27228	3.19978e-213	7.3147e-210	Null_Model_OpenChrom
TxnFactorChIPV3	HepG2	FOXA1	6051	19461	0.31093	750.156	170.328	31.1213	8.06632	6.20345e-213	1.41811e-209	Null_Model_OpenChrom
TxnFactorChIPV3	HepG2+forskolin	CEBPB	3259	19461	0.167463	314.414	94.8164	31.0557	10.3653	4.78138e-212	1.09302e-208	Null_Model_OpenChrom
TxnFactorChIPV3	HepG2	SP1	3903	19461	0.200555	466.887	110.861	30.9948	8.35962	3.16578e-211	7.23698e-208	Null_Model_OpenChrom
TxnFactorChIPV3	HepG2	EP300	4360	19461	0.224038	544.833	123.117	30.9882	8.00245	3.88688e-211	8.8854e-208	Null_Model_OpenChrom
TxnFactorChIPV3	HepG2	RXRA	2829	19461	0.145368	292.426	82.0965	30.8975	9.67426	6.46022e-210	1.47681e-206	Null_Model_OpenChrom
TxnFactorChIPV3	HepG2	HDAC2	2936	19461	0.150866	373.023	83.3225	30.7597	7.87083	4.53456e-208	1.0366e-204	Null_Model_OpenChrom
TxnFactorChIPV3	HepG2	ARID3A	2682	19461	0.137814	311.716	77.0913	30.7465	8.60398	6.81622e-208	1.55819e-204	Null_Model_OpenChrom
TxnFactorChIPV3	HepG2+forskolin	HNF4A	2065	19461	0.10611	202.551	60.6011	30.7329	10.1949	1.03352e-207	2.36262e-204	Null_Model_OpenChrom
TxnFactorChIPV3	HepG2	NFIC	2559	19461	0.131494	343.885	72.4901	30.5575	7.44144	2.25045e-205	5.14454e-202	Null_Model_OpenChrom
TxnFactorChIPV3	HepG2	TEAD4	2145	19461	0.11022	285.061	61.0895	30.4461	7.52471	6.73726e-204	1.54014e-200	Null_Model_OpenChrom
TxnFactorChIPV3	HepG2	MYBL2	2629	19461	0.135091	415.544	72.9307	30.3501	6.32664	1.25221e-202	2.86256e-199	Null_Model_OpenChrom
Pazar_Chip	HepG2_GSE25021	HNF4A	4420	19461	0.227121	581.442	126.477	30.3499	7.6018	1.25992e-202	2.88018e-199	Null_Model_OpenChrom
TxnFactorChIPV3	A549	CEBPB	2614	19461	0.13432	489.733	70.4794	30.1403	5.3376	7.19785e-200	1.64543e-196	Null_Model_OpenChrom
TxnFactorChIPV3	HepG2	FOSL2	2373	19461	0.121936	440.979	64.6252	29.8958	5.38121	1.11578e-196	2.55068e-193	Null_Model_OpenChrom
TxnFactorChIPV3	HepG2	JUND	3025	19461	0.155439	662.018	79.4245	29.7513	4.56936	8.34201e-195	1.90698e-191	Null_Model_OpenChrom
TxnFactorChIPV3	HepG2	CEBPD	1575	19461	0.0809311	229.65	45.2959	29.7014	6.85825	3.68685e-194	8.42813e-191	Null_Model_OpenChrom
BroadChromHMM	HepG2	StrongEnhancer	3651	19461	0.187606	886.261	93.3617	29.6132	4.11956	5.05176e-193	1.15483e-189	Null_Model_OpenChrom
TxnFactorChIPV3	HeLa-S3	CEBPB	3288	19461	0.168953	916.986	81.1886	29.2038	3.58566	8.67892e-188	1.984e-184	Null_Model_OpenChrom
Pazar_Chip	LNCaP_GSE27823	FOXA1	1988	19461	0.102153	457.876	52.6368	29.0695	4.34179	4.36386e-186	9.97578e-183	Null_Model_OpenChrom
Pazar_Chip	LNCaP_GSE27823	none	1988	19461	0.102153	457.11	52.8525	28.9654	4.34906	8.99e-185	2.05511e-181	Null_Model_OpenChrom
TxnFactorChIPV3	HepG2	MBD4	957	19461	0.0491753	137.174	28.441	28.8256	6.97655	5.13159e-183	1.17308e-179	Null_Model_OpenChrom
Pazar_Chip	LS180_GSE31939_125	CEBPb	1764	19461	0.0906428	338.609	49.4928	28.8	5.20954	1.0732e-182	2.45335e-179	Null_Model_OpenChrom
Pazar_Chip	LS180_GSE31939_Veh	CEBPb	1680	19461	0.0863265	315.141	47.5609	28.6971	5.33095	2.07583e-181	4.74534e-178	Null_Model_OpenChrom
Pazar_Chip	LNCaP_GSE28264_ethanol	FOXA1	2844	19461	0.146138	882.379	68.4679	28.6502	3.22311	7.96307e-181	1.82036e-177	Null_Model_OpenChrom
Pazar_Chip	LS180_GSE31939_Veh	none	1902	19461	0.0977339	421.168	51.7545	28.6126	4.51601	2.34119e-180	5.35197e-177	Null_Model_OpenChrom
Pazar_Chip	adipocyte_GSE25836	PPARg	1371	19461	0.0704486	274.546	38.4389	28.5246	4.99369	2.90595e-179	6.64301e-176	Null_Model_OpenChrom
Pazar_Chip	adipocyte_GSE25836	none	1371	19461	0.0704486	274.221	38.4637	28.5147	4.99962	3.85476e-179	8.81197e-176	Null_Model_OpenChrom
TxnFactorChIPV3	HepG2	BHLHE40	1462	19461	0.0751246	310.047	40.4708	28.4638	4.71541	1.64537e-178	3.76131e-175	Null_Model_OpenChrom
Pazar_Chip	LS180_GSE31939_125	none	2027	19461	0.104157	471.964	54.6697	28.4442	4.29482	2.87276e-178	6.56712e-175	Null_Model_OpenChrom
Pazar_Chip	HepG2_GSE25021	none	5196	19461	0.266996	1567.48	127.635	28.4288	3.31487	4.46142e-178	1.01988e-174	Null_Model_OpenChrom
Pazar_Chip	LNCaP_GSE28264_ethanol	none	2924	19461	0.150249	918.241	70.5861	28.4158	3.18435	6.45261e-178	1.47507e-174	Null_Model_OpenChrom
Pazar_Chip	LNCaP_GSE28264_DHT	FOXA1	2125	19461	0.109193	609.52	53.3377	28.4129	3.48635	7.00608e-178	1.60159e-174	Null_Model_OpenChrom
TxnFactorChIPV3	T-47D+DMSO_0.02pct	FOXA1	2126	19461	0.109244	571.766	54.7553	28.3851	3.7183	1.54552e-177	3.53307e-174	Null_Model_OpenChrom
TxnFactorChIPV3	HepG2	JUN	978	19461	0.0502544	177.314	28.6403	27.9566	5.51565	2.74133e-172	6.26667e-169	Null_Model_OpenChrom
TxnFactorChIPV3	HepG2	TCF12	411	19461	0.0211192	40.8911	13.3042	27.819	10.0511	1.27784e-170	2.92114e-167	Null_Model_OpenChrom
TxnFactorChIPV3	A549+DEX_50nM	NR3C1	1500	19461	0.0770772	399.512	39.7212	27.7053	3.75458	3.01604e-169	6.89468e-166	Null_Model_OpenChrom
Pazar_Chip	MCF7_GSE23852_E2	FOXA1	1808	19461	0.0929038	532.057	46.1093	27.6722	3.39813	7.55488e-169	1.72705e-165	Null_Model_OpenChrom
TxnFactorChIPV3	HepG2	none	10685	19461	0.549047	4409.68	227.09	27.6337	2.42308	2.1929e-168	5.01297e-165	Null_Model_OpenChrom
TxnFactorChIPV3	IMR90	CEBPB	2883	19461	0.148142	914.662	71.2626	27.6209	3.15198	3.12161e-168	7.136e-165	Null_Model_OpenChrom
Pazar_Chip	MCF7_GSE23852_ETOH	FOXA1	1748	19461	0.0898207	516.041	44.7199	27.5484	3.38733	2.31538e-167	5.29296e-164	Null_Model_OpenChrom
TxnFactorChIPV3	A549+DEX_50nM	none	1500	19461	0.0770772	401.224	40.1081	27.3954	3.73856	1.5578e-165	3.56113e-162	Null_Model_OpenChrom
BroadChromHMM	HepG2	none	9235	19461	0.474539	4216.65	183.746	27.3112	2.19012	1.55932e-164	3.5646e-161	Null_Model_OpenChrom
Pazar_Chip	MCF7_GSE23852_E2	none	1808	19461	0.0929038	533.032	46.6896	27.3073	3.39192	1.73721e-164	3.97126e-161	Null_Model_OpenChrom
TxnFactorChIPV3	HepG2	MXI1	1888	19461	0.0970145	527.176	49.8425	27.3025	3.58135	1.9821e-164	4.53109e-161	Null_Model_OpenChrom
Roadmapepigenomics	Adult_Liver	none	15724	19461	0.807975	4111.41	426.085	27.2542	3.82448	7.41303e-164	1.69462e-160	Null_Model_OpenChrom
Pazar_Chip	Caco-2_GSE23436_differentiated	HNF4	7228	19461	0.371409	2387.36	179.211	27.0108	3.02761	5.52237e-161	1.26241e-157	Null_Model_OpenChrom
TxnFactorChIPV3	HepG2	TBP	1331	19461	0.0683932	353.504	36.2132	26.9928	3.76516	8.9743e-161	2.05153e-157	Null_Model_OpenChrom
TxnFactorChIPV3	HepG2+forskolin	none	4959	19461	0.254817	1282.88	136.789	26.8744	3.86553	2.18762e-159	5.00089e-156	Null_Model_OpenChrom
TxnFactorChIPV3	K562	CEBPB	1951	19461	0.100252	540.351	52.5079	26.8655	3.61062	2.78065e-159	6.35656e-156	Null_Model_OpenChrom
TxnFactorChIPV3	HepG2	MAFF	1068	19461	0.054879	274.626	29.7723	26.648	3.88892	9.42896e-157	2.15546e-153	Null_Model_OpenChrom
TxnFactorChIPV3	HepG2	USF1	1489	19461	0.076512	361.668	42.4119	26.5806	4.11703	5.693e-156	1.30142e-152	Null_Model_OpenChrom
TxnFactorChIPV3	A549+EtOH_0.02pct	TCF12	1521	19461	0.0781563	459.569	39.9748	26.5525	3.30962	1.20091e-155	2.74528e-152	Null_Model_OpenChrom
TxnFactorChIPV3	A549+DEX_5nM	none	805	19461	0.0413648	185.532	23.7158	26.1204	4.33886	1.06902e-150	2.44378e-147	Null_Model_OpenChrom
TxnFactorChIPV3	HepG2	SMC3	1564	19461	0.0803659	506.953	40.4896	26.1066	3.0851	1.53386e-150	3.5064e-147	Null_Model_OpenChrom
TxnFactorChIPV3	A549+DEX_5nM	NR3C1	805	19461	0.0413648	185.619	23.7905	26.0348	4.33683	9.99106e-150	2.28396e-146	Null_Model_OpenChrom
TxnFactorChIPV3	HepG2	SIN3AK20	1425	19461	0.0732234	470.258	36.8027	25.9422	3.03025	1.11366e-148	2.54584e-145	Null_Model_OpenChrom
Pazar_Chip	U937_GSE29195_BIO	none	1822	19461	0.0936231	614.135	46.6083	25.9152	2.96678	2.2429e-148	5.12727e-145	Null_Model_OpenChrom
TxnFactorChIPV3	A549+EtOH_0.02pct	EP300	1313	19461	0.0674683	393.027	35.6059	25.8376	3.34074	1.67541e-147	3.82998e-144	Null_Model_OpenChrom
Pazar_Chip	U937_GSE29195_BIO	CEBPA	1745	19461	0.0896665	568.019	45.7157	25.7457	3.07208	1.80167e-146	4.11863e-143	Null_Model_OpenChrom
Pazar_Chip	U937_GSE29195_DMSO	none	1402	19461	0.0720415	424.699	37.9847	25.7288	3.30116	2.78195e-146	6.35954e-143	Null_Model_OpenChrom
TxnFactorChIPV3	MCF10A-Er-Src+4OHTAM_1uM_4hr	MYC	1463	19461	0.075176	503.226	37.3488	25.6976	2.90724	6.21824e-146	1.42149e-142	Null_Model_OpenChrom
Pazar_Chip	U937_GSE29195_DMSO	CEBPA	1402	19461	0.0720415	423.943	38.136	25.6465	3.30705	2.3104e-145	5.28158e-142	Null_Model_OpenChrom
TxnFactorChIPV3	HepG2	MAX	1163	19461	0.0597605	343.781	32.054	25.5574	3.38297	2.26983e-144	5.18883e-141	Null_Model_OpenChrom
TxnFactorChIPV3	HepG2	ELF1	1494	19461	0.0767689	407.595	42.6239	25.4882	3.6654	1.3328e-143	3.04677e-140	Null_Model_OpenChrom
TxnFactorChIPV3	MCF10A-Er-Src+EtOH_0.01pct	STAT3	857	19461	0.0440368	221.009	25.0128	25.4266	3.87767	6.39935e-143	1.46289e-139	Null_Model_OpenChrom
DNaseClusters	HepG2	none	8036	19461	0.412928	2865.44	203.466	25.4124	2.80446	9.1893e-143	2.10067e-139	Null_Model_OpenChrom
TxnFactorChIPV3	MCF10A-Er-Src+EtOH_0.01pct_4hr	STAT3	1854	19461	0.0952675	730.926	44.3288	25.3351	2.53651	6.56309e-142	1.50032e-138	Null_Model_OpenChrom
TxnFactorChIPV3	A549+DEX_100nM	NR3C1	1141	19461	0.0586301	345.012	31.4794	25.286	3.30713	2.27513e-141	5.20094e-138	Null_Model_OpenChrom
TxnFactorChIPV3	HepG2	TCF7L2	350	19461	0.0179847	51.0999	11.8393	25.2463	6.84933	6.2112e-141	1.41988e-137	Null_Model_OpenChrom
TxnFactorChIPV3	A549+DEX_100nM	FOXA1	547	19461	0.0281075	111.142	17.2931	25.2042	4.92164	1.80019e-140	4.11523e-137	Null_Model_OpenChrom
TxnFactorChIPV3	H1-hESC	CEBPB	786	19461	0.0403885	206.227	23.0053	25.2017	3.81134	1.91718e-140	4.38268e-137	Null_Model_OpenChrom
TxnFactorChIPV3	HepG2	SRF	473	19461	0.024305	85.2118	15.4269	25.1372	5.55088	9.76544e-140	2.23238e-136	Null_Model_OpenChrom
TxnFactorChIPV3	MCF10A-Er-Src+EtOH_0.01pct_4hr	none	1854	19461	0.0952675	731.707	44.7667	25.0698	2.5338	5.30564e-139	1.21287e-135	Null_Model_OpenChrom
TxnFactorChIPV3	HeLa-S3	EP300	1387	19461	0.0712707	476.203	36.4238	25.0056	2.91262	2.6591e-138	6.07871e-135	Null_Model_OpenChrom
Pazar_Chip	U937_GSE29195_BMP4	CEBPA	736	19461	0.0378192	191.05	21.9466	24.8307	3.8524	2.08877e-136	4.77494e-133	Null_Model_OpenChrom
Pazar_Chip	LNCaP_GSE28264_ethanol	AR	809	19461	0.0415703	216.116	23.9046	24.8021	3.74336	4.25685e-136	9.73115e-133	Null_Model_OpenChrom
TxnFactorChIPV3	HepG2	RCOR1	592	19461	0.0304198	135.544	18.4846	24.6938	4.36757	6.22846e-135	1.42383e-131	Null_Model_OpenChrom
TxnFactorChIPV3	A549+EtOH_0.02pct	FOSL2	1407	19461	0.0722984	529.399	35.553	24.6843	2.65773	7.88607e-135	1.80276e-131	Null_Model_OpenChrom
BroadChromHMM	HepG2	WeakEnhancer	4188	19461	0.2152	1852.37	95.3655	24.4914	2.26089	9.12549e-133	2.08609e-129	Null_Model_OpenChrom
TxnFactorChIPV3	A549+DEX_100nM	USF1	816	19461	0.04193	242.741	23.662	24.2269	3.3616	5.78724e-130	1.32296e-126	Null_Model_OpenChrom
TxnFactorChIPV3	HeLa-S3	STAT3	862	19461	0.0442937	260.579	24.8281	24.2234	3.30801	6.31308e-130	1.44317e-126	Null_Model_OpenChrom
TxnFactorChIPV3	MCF10A-Er-Src+4OHTAM_1uM_36hr	STAT3	1752	19461	0.0900262	717.407	42.9327	24.098	2.44213	1.31137e-128	2.99779e-125	Null_Model_OpenChrom
TxnFactorChIPV3	MCF10A-Er-Src+EtOH_0.01pct_12hr	STAT3	1579	19461	0.0811366	676.042	37.7594	23.9135	2.33565	1.10929e-126	2.53583e-123	Null_Model_OpenChrom
TxnFactorChIPV3	MCF10A-Er-Src+EtOH_0.01pct_12hr	none	1579	19461	0.0811366	675.295	37.9083	23.8393	2.33824	6.54461e-126	1.4961e-122	Null_Model_OpenChrom
TxnFactorChIPV3	HeLa-S3	RFX5	1031	19461	0.0529778	367.881	28.2088	23.5075	2.80254	1.70996e-122	3.90896e-119	Null_Model_OpenChrom
TxnFactorChIPV3	HepG2	USF2	480	19461	0.0246647	112.036	15.6914	23.4501	4.28434	6.59274e-122	1.5071e-118	Null_Model_OpenChrom
TxnFactorChIPV3	MCF10A-Er-Src+4OHTAM_1uM_12hr	STAT3	1529	19461	0.0785674	654.841	37.3725	23.3904	2.33492	2.67408e-121	6.11294e-118	Null_Model_OpenChrom
DNaseClusters	Huh-7	none	6522	19461	0.335132	2282.48	183.062	23.1589	2.85742	5.90804e-119	1.35058e-115	Null_Model_OpenChrom
TxnFactorChIPV3	T-47D+DMSO_0.02pct	GATA3	1317	19461	0.0676738	538.247	33.7019	23.1071	2.44683	1.96498e-118	4.49194e-115	Null_Model_OpenChrom
TxnFactorChIPV3	HepG2+forskolin	ESRRA	196	19461	0.0100714	25.8232	7.41416	22.953	7.59008	6.88242e-117	1.57332e-113	Null_Model_OpenChrom
TxnFactorChIPV3	HepG2	ATF3	364	19461	0.0187041	72.7093	12.7383	22.8673	5.00624	4.91592e-116	1.12378e-112	Null_Model_OpenChrom
Pazar_Chip	LNCaP_GSE28264_DHT	none	3102	19461	0.159396	1124.76	86.8422	22.7681	2.75791	4.74369e-115	1.08441e-111	Null_Model_OpenChrom
TxnFactorChIPV3	MCF10A-Er-Src+EtOH_0.01pct	FOS	2065	19461	0.10611	1042.77	44.9775	22.7277	1.98031	1.1928e-114	2.72674e-111	Null_Model_OpenChrom
TxnFactorChIPV3	T-47D+DMSO_0.02pct	EP300	784	19461	0.0402857	266.563	22.9867	22.5103	2.94114	1.64659e-112	3.76411e-109	Null_Model_OpenChrom
TxnFactorChIPV3	MCF10A-Er-Src+4OHTAM_1uM_4hr	none	2717	19461	0.139613	1462.19	56.1447	22.3496	1.85818	6.08525e-111	1.39109e-107	Null_Model_OpenChrom
DNaseClusters	RPTEC	none	5813	19461	0.2987	2365.58	154.854	22.2624	2.45733	4.27543e-110	9.77364e-107	Null_Model_OpenChrom
TxnFactorChIPV3	HepG2	REST	971	19461	0.0498947	367.68	27.1265	22.241	2.64088	6.89868e-110	1.57704e-106	Null_Model_OpenChrom
TxnFactorChIPV3	HepG2	MAFK	1196	19461	0.0614562	408.05	35.5313	22.1762	2.93101	2.91361e-109	6.66051e-106	Null_Model_OpenChrom
TxnFactorChIPV3	HeLa-S3	RCOR1	944	19461	0.0485073	363.831	26.1849	22.1567	2.59461	4.49922e-109	1.02852e-105	Null_Model_OpenChrom
TxnFactorChIPV3	MCF10A-Er-Src+EtOH_0.01pct	MYC	2025	19461	0.104054	755.667	57.2981	22.1531	2.67975	4.86581e-109	1.11233e-105	Null_Model_OpenChrom
Pazar_Chip	MCF7_GSE23852_ETOH	none	2421	19461	0.124403	1039.41	62.4126	22.1364	2.3292	7.05947e-109	1.6138e-105	Null_Model_OpenChrom
TxnFactorChIPV3	MCF10A-Er-Src+4OHTAM_1uM_4hr	FOS	2345	19461	0.120497	1283.41	48.004	22.1147	1.82717	1.1406e-108	2.6074e-105	Null_Model_OpenChrom
TxnFactorChIPV3	HepG2	RFX5	494	19461	0.0253841	135.261	16.2634	22.058	3.65221	3.99862e-108	9.14084e-105	Null_Model_OpenChrom
TxnFactorChIPV3	A549+EtOH_0.02pct	BCL3	614	19461	0.0315503	191.145	19.2055	22.0174	3.21222	9.81542e-108	2.2438e-104	Null_Model_OpenChrom
TxnFactorChIPV3	A549+EtOH_0.02pct	USF1	791	19461	0.0406454	280.613	23.1888	22.0101	2.81882	1.15317e-107	2.63615e-104	Null_Model_OpenChrom
DNaseClusters	Hepatocytes	none	6447	19461	0.331278	2610.36	174.902	21.936	2.46978	5.89526e-107	1.34766e-103	Null_Model_OpenChrom
TxnFactorChIPV3	HepG2	MYC	492	19461	0.0252813	137.637	16.1892	21.8888	3.57461	1.66141e-106	3.79799e-103	Null_Model_OpenChrom
TxnFactorChIPV3	HepG2	ZBTB33	300	19461	0.0154154	64.3816	10.8024	21.8116	4.65972	8.99658e-106	2.05662e-102	Null_Model_OpenChrom
Pazar_Chip	LNCaP_GSE28264_DHT	AR	2490	19461	0.127948	907.766	72.6525	21.7781	2.743	1.87097e-105	4.27704e-102	Null_Model_OpenChrom
TxnFactorChIPV3	HeLa-S3	USF2	675	19461	0.0346848	227.996	20.5922	21.7075	2.96058	8.7216e-105	1.99376e-101	Null_Model_OpenChrom
TxnFactorChIPV3	HepG2	YY1	1243	19461	0.0638713	475.256	35.6311	21.547	2.61543	2.82252e-103	6.45229e-100	Null_Model_OpenChrom
TxnFactorChIPV3	A549+EtOH_0.02pct	ZBTB33	568	19461	0.0291866	179.404	18.0374	21.5439	3.16605	3.02087e-103	6.90571e-100	Null_Model_OpenChrom
TxnFactorChIPV3	HeLa-S3	TBP	1081	19461	0.055547	448.65	29.4355	21.4825	2.40945	1.13381e-102	2.5919e-99	Null_Model_OpenChrom
TxnFactorChIPV3	A549+EtOH_0.02pct	ATF3	523	19461	0.0268743	158.137	16.996	21.4676	3.30726	1.56446e-102	3.57637e-99	Null_Model_OpenChrom
TxnFactorChIPV3	MCF10A-Er-Src+4OHTAM_1uM_12hr	none	2635	19461	0.135399	1522.26	51.9952	21.4008	1.73098	6.57285e-102	1.50255e-98	Null_Model_OpenChrom
TxnFactorChIPV3	HeLa-S3	GTF2F1	769	19461	0.0395149	283.55	22.7388	21.349	2.71204	1.99274e-101	4.5554e-98	Null_Model_OpenChrom
Pazar_Chip	VCS2_GSE32346	none	2145	19461	0.11022	1061.23	50.8372	21.3184	2.02124	3.83072e-101	8.75702e-98	Null_Model_OpenChrom
Pazar_Chip	Caco-2_GSE23436_proliferating	HNF4	6014	19461	0.309028	2646.79	158.155	21.2906	2.27219	6.93895e-101	1.58624e-97	Null_Model_OpenChrom
Pazar_Chip	VCaP_GSE32345	AR	2425	19461	0.124608	1097.56	62.7721	21.147	2.20945	1.47032e-99	3.36115e-96	Null_Model_OpenChrom
Pazar_Chip	VCS2_GSE32346	AR	2145	19461	0.11022	1063.36	51.3051	21.0825	2.01719	5.76072e-99	1.3169e-95	Null_Model_OpenChrom
DNaseClusters	HRCEpiC	none	6092	19461	0.313036	2746.85	158.814	21.0633	2.21781	8.63839e-99	1.97473e-95	Null_Model_OpenChrom
TxnFactorChIPV3	HepG2	MAZ	897	19461	0.0460922	350.115	26.0336	21.0069	2.56202	2.8357e-98	6.48242e-95	Null_Model_OpenChrom
Pazar_Chip	MCF7_GSE25021_oestrogen	ERA	1834	19461	0.0942398	782.26	50.2533	20.9288	2.34449	1.46452e-97	3.3479e-94	Null_Model_OpenChrom
TxnFactorChIPV3	HepG2+forskolin	PPARGC1A	179	19461	0.00919788	29.5744	7.18489	20.7972	6.05253	2.29484e-96	5.246e-93	Null_Model_OpenChrom
Pazar_Chip	VCaP_GSE32345	none	2425	19461	0.124608	1099.1	63.8782	20.7567	2.20634	5.33715e-96	1.22007e-92	Null_Model_OpenChrom
TxnFactorChIPV3	MCF10A-Er-Src+4OHTAM_1uM_36hr	FOS	1876	19461	0.0963979	1053.24	39.8432	20.6501	1.78118	4.87563e-95	1.11457e-91	Null_Model_OpenChrom
DNaseClusters	Huh-7.5	none	6633	19461	0.340836	2735.09	190.13	20.5013	2.42515	1.04765e-93	2.39492e-90	Null_Model_OpenChrom
TxnFactorChIPV3	HeLa-S3	CHD2	1205	19461	0.0619187	495.61	34.7101	20.4376	2.43135	3.87561e-93	8.85964e-90	Null_Model_OpenChrom
TxnFactorChIPV3	T-47D+Genistein_100nM	none	457	19461	0.0234829	146.922	15.3788	20.1627	3.11049	1.0417e-90	2.38132e-87	Null_Model_OpenChrom
TxnFactorChIPV3	HeLa-S3	BRCA1	514	19461	0.0264118	170.096	17.0764	20.1392	3.02182	1.6746e-90	3.82813e-87	Null_Model_OpenChrom
TxnFactorChIPV3	T-47D+Estradiol_10nM	ESR1	457	19461	0.0234829	145.712	15.466	20.1272	3.13632	2.13085e-90	4.87112e-87	Null_Model_OpenChrom
Pazar_Chip	K562_GSE26439	none	836	19461	0.0429577	278.268	27.7965	20.0648	3.0043	7.49053e-90	1.71234e-86	Null_Model_OpenChrom
TxnFactorChIPV3	HeLa-S3	MAX	1669	19461	0.0857613	741.87	46.2148	20.0613	2.24972	8.03757e-90	1.83739e-86	Null_Model_OpenChrom
TxnFactorChIPV3	HepG2	ZBTB7A	584	19461	0.0300087	206.581	18.8207	20.0534	2.82697	9.42394e-90	2.15431e-86	Null_Model_OpenChrom
TxnFactorChIPV3	T-47D+Genistein_100nM	ESR1	457	19461	0.0234829	146.649	15.4834	20.0441	3.11628	1.13676e-89	2.59863e-86	Null_Model_OpenChrom
Pazar_Chip	K562_GSE26439	NFY	836	19461	0.0429577	278.247	27.8593	20.0204	3.00453	1.82909e-89	4.18129e-86	Null_Model_OpenChrom
Pazar_Chip	LS180_GSE31939_125	CDX2	403	19461	0.0207081	120.357	14.1664	19.9517	3.34838	7.23932e-89	1.65491e-85	Null_Model_OpenChrom
TxnFactorChIPV3	A549+DEX_100nM	CREB1	891	19461	0.0457839	355.444	26.8754	19.9274	2.50673	1.17709e-88	2.69083e-85	Null_Model_OpenChrom
H3K27Ac_Broad	HepG2	none	5890	19461	0.302657	2567.6	166.729	19.927	2.29397	1.18741e-88	2.71442e-85	Null_Model_OpenChrom
TxnFactorChIPV3	HeLa-S3	JUND	1170	19461	0.0601202	554.164	30.964	19.8888	2.11129	2.54381e-88	5.81514e-85	Null_Model_OpenChrom
TxnFactorChIPV3	T-47D+Estradiol_10nM	none	457	19461	0.0234829	145.973	15.737	19.764	3.13072	3.03874e-87	6.94656e-84	Null_Model_OpenChrom
TxnFactorChIPV3	A549+EtOH_0.02pct	GABPA	753	19461	0.0386928	306.683	22.7291	19.6364	2.4553	3.77984e-86	8.6407e-83	Null_Model_OpenChrom
Pazar_Chip	LS180_GSE31939_Veh	CDX2	360	19461	0.0184985	109.019	12.8096	19.5932	3.30218	8.84492e-86	2.02195e-82	Null_Model_OpenChrom
TxnFactorChIPV3	MCF10A-Er-Src+4OHTAM_1uM_12hr	FOS	2286	19461	0.117466	1359.07	47.4998	19.5143	1.68203	4.1485e-85	9.48347e-82	Null_Model_OpenChrom
TxnFactorChIPV3	HeLa-S3+IFNg30	STAT1	766	19461	0.0393608	329.938	22.398	19.4688	2.32165	1.01062e-84	2.31028e-81	Null_Model_OpenChrom
TxnFactorChIPV3	A549+EtOH_0.02pct	REST	708	19461	0.0363805	289.137	21.5186	19.4651	2.44867	1.08488e-84	2.48003e-81	Null_Model_OpenChrom
TxnFactorChIPV3	HeLa-S3+IFNg30	none	766	19461	0.0393608	330.353	22.4413	19.4128	2.31873	3.00919e-84	6.879e-81	Null_Model_OpenChrom
Pazar_Chip	LS174T_GSE18481	none	597	19461	0.0306767	223.076	19.2975	19.3768	2.67622	6.05802e-84	1.38486e-80	Null_Model_OpenChrom
Pazar_Chip	LS174T_GSE18481	TCF4	597	19461	0.0306767	223.638	19.3008	19.3444	2.66949	1.13601e-83	2.59691e-80	Null_Model_OpenChrom
TxnFactorChIPV3	A549+EtOH_0.02pct	TAF1	734	19461	0.0377165	303.952	22.2572	19.3218	2.41485	1.7618e-83	4.02747e-80	Null_Model_OpenChrom
TxnFactorChIPV3	ECC-1+DMSO_0.02pct	FOXA1	350	19461	0.0179847	99.4745	12.9834	19.2958	3.51849	2.91413e-83	6.6617e-80	Null_Model_OpenChrom
TxnFactorChIPV3	HeLa-S3	JUN	856	19461	0.0439854	393.67	24.1138	19.1729	2.17441	3.11913e-82	7.13032e-79	Null_Model_OpenChrom
TxnFactorChIPV3	HepG2+forskolin	HSF1	157	19461	0.00806742	29.3057	6.66051	19.1718	5.35732	3.18109e-82	7.27197e-79	Null_Model_OpenChrom
TxnFactorChIPV3	MCF-7	TCF7L2	558	19461	0.0286727	210.47	18.1719	19.1246	2.65122	7.87487e-82	1.8002e-78	Null_Model_OpenChrom
TxnFactorChIPV3	HepG2	NR2C2	272	19461	0.0139767	71.4356	10.4897	19.1201	3.80763	8.58795e-82	1.9632e-78	Null_Model_OpenChrom
Pazar_Chip	MCF7_GSE29073_estradiol	none	1253	19461	0.0643852	619.583	33.1894	19.0849	2.02233	1.68625e-81	3.85477e-78	Null_Model_OpenChrom
TxnFactorChIPV3	HeLa-S3	MYC	741	19461	0.0380762	301.368	23.0405	19.0809	2.45879	1.82141e-81	4.16374e-78	Null_Model_OpenChrom
Pazar_Chip	U937_GSE29195_BMP4	none	1099	19461	0.0564719	530.027	29.8452	19.0641	2.07348	2.50853e-81	5.73449e-78	Null_Model_OpenChrom
TxnFactorChIPV3	MCF10A-Er-Src+4OHTAM_1uM_36hr	E2F4	800	19461	0.0411079	339.774	24.2135	19.007	2.3545	7.46688e-81	1.70693e-77	Null_Model_OpenChrom
DNaseClusters	HGF	none	4393	19461	0.225734	2174.74	116.723	19.0044	2.02001	7.83568e-81	1.79124e-77	Null_Model_OpenChrom
TxnFactorChIPV3	HeLa-S3	MXI1	764	19461	0.039258	323.406	23.4173	18.8149	2.36236	2.84966e-79	6.51433e-76	Null_Model_OpenChrom
Pazar_Chip	Caco-2_GSE23436_proliferating	GATA6	1812	19461	0.0931093	1008.89	42.7578	18.7827	1.79603	5.22845e-79	1.19522e-75	Null_Model_OpenChrom
Pazar_Chip	Caco-2_GSE23436_differentiated	CDX2	5359	19461	0.275371	2715.74	140.761	18.7784	1.97331	5.66975e-79	1.2961e-75	Null_Model_OpenChrom
TxnFactorChIPV3	A549+EtOH_0.02pct	ELF1	563	19461	0.0289297	222.628	18.1477	18.7556	2.52888	8.70981e-79	1.99106e-75	Null_Model_OpenChrom
Pazar_Chip	BJ_GSE26005_p005	TERF2	37	19461	0.00190124	2.38761	1.85408	18.6682	15.4967	4.48773e-78	1.02589e-74	Null_Model_OpenChrom
TxnFactorChIPV3	MCF-7	ZNF217	508	19461	0.0261035	188.917	17.1102	18.6487	2.68901	6.46657e-78	1.47826e-74	Null_Model_OpenChrom
TxnFactorChIPV3	HeLa-S3	TCF7L2	1068	19461	0.054879	463.217	32.4314	18.6481	2.30562	6.54762e-78	1.49679e-74	Null_Model_OpenChrom
Pazar_Chip	MCF7_GSE29073_estradiol	GATA3	1253	19461	0.0643852	622.911	33.9483	18.5602	2.01152	3.36957e-77	7.70283e-74	Null_Model_OpenChrom
TxnFactorChIPV3	HeLa-S3	MAFK	506	19461	0.0260007	190.846	17.0334	18.5021	2.65135	9.92487e-77	2.26883e-73	Null_Model_OpenChrom
Pazar_Chip	DFB_GSE23792	none	30	19461	0.00154154	1.74925	1.5395	18.3506	17.1502	1.63262e-75	3.73217e-72	Null_Model_OpenChrom
Roadmapepigenomics	HepG2_Hepatocellular_Carcinoma	none	10831	19461	0.556549	5034.38	322.211	17.9901	2.15141	1.16453e-72	2.66212e-69	Null_Model_OpenChrom
Pazar_Chip	MCF7_GSE28007	none	1630	19461	0.0837573	898.078	40.7217	17.9737	1.81499	1.56435e-72	3.57611e-69	Null_Model_OpenChrom
TxnFactorChIPV3	HepG2	TAF1	1013	19461	0.0520528	491.138	29.1698	17.8905	2.06256	6.99278e-72	1.59855e-68	Null_Model_OpenChrom
TxnFactorChIPV3	HepG2	CHD2	396	19461	0.0203484	139.439	14.3414	17.8896	2.83996	7.10332e-72	1.62382e-68	Null_Model_OpenChrom
DNaseI_Duke	Huh-7	none	6856	19461	0.352294	3590.58	182.637	17.8793	1.90944	8.55317e-72	1.95526e-68	Null_Model_OpenChrom
Pazar_Chip	BJ_GSE26005_p005	none	37	19461	0.00190124	2.51149	1.94013	17.7764	14.7323	5.38761e-71	1.23161e-67	Null_Model_OpenChrom
TxnFactorChIPV3	MCF-7	GATA3	559	19461	0.0287241	230.386	18.6961	17.5766	2.42637	1.86112e-69	4.25451e-66	Null_Model_OpenChrom
DNaseClusters	HVMF	none	4606	19461	0.236678	2499.85	119.941	17.5599	1.84251	2.49639e-69	5.70675e-66	Null_Model_OpenChrom
Pazar_Chip	DFB_GSE23792	IGF1R	30	19461	0.00154154	1.76124	1.61924	17.4395	17.0335	2.06757e-68	4.72646e-65	Null_Model_OpenChrom
Pazar_Chip	LNCaP_GSE28264	NKX31	227	19461	0.0116644	62.8192	9.5638	17.1669	3.61355	2.34918e-66	5.37022e-63	Null_Model_OpenChrom
TxnFactorChIPV3	A549+EtOH_0.02pct	ETS1	401	19461	0.0206053	151.311	14.5485	17.1626	2.65018	2.53133e-66	5.78662e-63	Null_Model_OpenChrom
Pazar_Chip	LNCaP_GSE28264	none	227	19461	0.0116644	63.3746	9.54225	17.1475	3.58188	3.28277e-66	7.50441e-63	Null_Model_OpenChrom
DNaseI_Duke	HepG2	none	5856	19461	0.30091	2898.01	172.704	17.1275	2.02069	4.62576e-66	1.05745e-62	Null_Model_OpenChrom
Pazar_Chip	HPC_GSE24933	GABPA	575	19461	0.0295463	239.361	19.6981	17.0392	2.40223	2.10287e-65	4.80717e-62	Null_Model_OpenChrom
Pazar_Chip	Caco-2_GSE23436_differentiated	none	8741	19461	0.449155	4502.15	249.156	17.0129	1.94152	3.29722e-65	7.53745e-62	Null_Model_OpenChrom
H3K4Me2_Broad	HepG2	none	8333	19461	0.42819	4077.55	250.475	16.9895	2.04363	4.90797e-65	1.12196e-61	Null_Model_OpenChrom
TxnFactorChIPV3	A549	MAX	646	19461	0.0331946	300.14	20.5998	16.7895	2.15233	1.457e-63	3.33071e-60	Null_Model_OpenChrom
DNaseClusters	HMVEC-dLy-Ad	none	3550	19461	0.182416	1915.34	97.8468	16.7063	1.85345	5.89741e-63	1.34815e-59	Null_Model_OpenChrom
Pazar_Chip	HPC_GSE24933	none	575	19461	0.0295463	240.442	20.0264	16.7059	2.39143	5.93939e-63	1.35774e-59	Null_Model_OpenChrom
TxnFactorChIPV3	HeLa-S3	ELK4	407	19461	0.0209136	158.298	14.913	16.6769	2.5711	9.65049e-63	2.2061e-59	Null_Model_OpenChrom
TxnFactorChIPV3	HeLa-S3	PRDM1	234	19461	0.012024	71.8791	9.7272	16.6668	3.25547	1.14327e-62	2.61351e-59	Null_Model_OpenChrom
TxnFactorChIPV3	A549+DEX_500pM	none	114	19461	0.00585787	22.999	5.47622	16.6175	4.95674	2.60378e-62	5.95225e-59	Null_Model_OpenChrom
TxnFactorChIPV3	K562	ATF3	695	19461	0.0357125	291.823	24.3354	16.5675	2.38158	5.98188e-62	1.36746e-58	Null_Model_OpenChrom
TxnFactorChIPV3	T-47D+DMSO_0.02pct	none	2974	19461	0.152818	1420.22	94.3758	16.4638	2.09405	3.33882e-61	7.63255e-58	Null_Model_OpenChrom
DNaseClusters	A549	none	4517	19461	0.232105	2579.05	118.329	16.3776	1.75142	1.38173e-60	3.15863e-57	Null_Model_OpenChrom
TxnFactorChIPV3	A549	none	4021	19461	0.206618	2470.38	94.6884	16.376	1.62768	1.41864e-60	3.24301e-57	Null_Model_OpenChrom
TxnFactorChIPV3	K562	NRF1	270	19461	0.0138739	93.7273	10.7709	16.3656	2.8807	1.68272e-60	3.8467e-57	Null_Model_OpenChrom
Pazar_Chip	BJ_GSE26005_p05	TERF2	34	19461	0.00174708	2.7972	1.90731	16.3596	12.155	1.85836e-60	4.2482e-57	Null_Model_OpenChrom
TxnFactorChIPV3	HeLa-S3	TAF1	875	19461	0.0449617	458.601	25.4788	16.343	1.90797	2.44119e-60	5.58056e-57	Null_Model_OpenChrom
TxnFactorChIPV3	A549	BHLHE40	243	19461	0.0124865	75.0909	10.2959	16.3084	3.23608	4.30019e-60	9.83024e-57	Null_Model_OpenChrom
TxnFactorChIPV3	K562	ATF1	519	19461	0.0266687	234.622	17.542	16.2113	2.21207	2.09949e-59	4.79943e-56	Null_Model_OpenChrom
TxnFactorChIPV3	A549+DEX_500pM	NR3C1	114	19461	0.00585787	22.957	5.62984	16.1715	4.9658	4.00709e-59	9.1602e-56	Null_Model_OpenChrom
FANTOM5_enhancer_cell	hepatocyte	none	82	19461	0.00421356	13.8382	4.22206	16.1442	5.92564	6.23602e-59	1.42555e-55	Null_Model_OpenChrom
Pazar_Chip	adipocyte_GSE24326	none	362	19461	0.0186013	127.958	14.4985	16.1425	2.82905	6.41151e-59	1.46567e-55	Null_Model_OpenChrom
Pazar_Chip	adipocyte_GSE24326	E2F4	362	19461	0.0186013	126.769	14.5985	16.1134	2.85558	1.02754e-58	2.34895e-55	Null_Model_OpenChrom
TxnFactorChIPV3	MCF-7+estrogen	MYC	552	19461	0.0283644	254.278	18.4868	16.1046	2.17085	1.18483e-58	2.70853e-55	Null_Model_OpenChrom
DNaseClusters	HPF	none	4337	19461	0.222856	2334.76	125.486	15.9558	1.85758	1.2972e-57	2.9654e-54	Null_Model_OpenChrom
TxnFactorChIPV3	HepG2+insulin	none	211	19461	0.0108422	64.3956	9.19866	15.9376	3.27662	1.73771e-57	3.97241e-54	Null_Model_OpenChrom
TxnFactorChIPV3	K562	NR2F2	588	19461	0.0302143	284.927	19.1502	15.8261	2.06369	1.02775e-56	2.34943e-53	Null_Model_OpenChrom
TxnFactorChIPV3	HeLa-S3	ELK1	323	19461	0.0165973	123.739	12.6056	15.8073	2.61033	1.38481e-56	3.16568e-53	Null_Model_OpenChrom
TxnFactorChIPV3	HCT-116	ZBTB33	293	19461	0.0150558	106.789	11.8145	15.7612	2.74372	2.87644e-56	6.57555e-53	Null_Model_OpenChrom
TxnFactorChIPV3	HUVEC	MAX	526	19461	0.0270284	248.61	17.6227	15.7405	2.11576	3.99311e-56	9.12824e-53	Null_Model_OpenChrom
Pazar_Chip	U937_GSE29195_BMP4	SMAD1	873	19461	0.0448589	476.71	25.1833	15.7362	1.8313	4.27154e-56	9.76474e-53	Null_Model_OpenChrom
TxnFactorChIPV3	MCF-7+vehicle	MYC	1340	19461	0.0688557	711.182	40.1174	15.6745	1.88419	1.1308e-55	2.585e-52	Null_Model_OpenChrom
TxnFactorChIPV3	A549+EtOH_0.02pct	SIX5	330	19461	0.016957	122.509	13.2558	15.6528	2.69367	1.58928e-55	3.63309e-52	Null_Model_OpenChrom
H3K4Me1_Broad	HepG2	none	11620	19461	0.597092	6283.16	341.757	15.6159	1.84939	2.83731e-55	6.48609e-52	Null_Model_OpenChrom
TxnFactorChIPV3	HepG2+insulin	SREBP1	211	19461	0.0108422	64.3596	9.40279	15.5954	3.27845	3.91139e-55	8.94145e-52	Null_Model_OpenChrom
DNaseClusters	HeLa-S3	none	4392	19461	0.225682	2834.33	99.8805	15.5953	1.54957	3.91737e-55	8.95511e-52	Null_Model_OpenChrom
DNaseClusters	LNCaP	none	6210	19461	0.3191	3985.57	143.129	15.5414	1.55812	9.09236e-55	2.07851e-51	Null_Model_OpenChrom
DNaseClusters	AG09319	none	3831	19461	0.196855	2140.04	109.225	15.4814	1.79015	2.3162e-54	5.29484e-51	Null_Model_OpenChrom
Pazar_Chip	THP-1_GSE25426	RXR	115	19461	0.00590925	27.3107	5.6733	15.4565	4.21081	3.41127e-54	7.79817e-51	Null_Model_OpenChrom
Pazar_Chip	Caco-2_GSE23436_differentiated	GATA6	1549	19461	0.0795951	820.45	47.4949	15.3395	1.88799	2.08076e-53	4.75662e-50	Null_Model_OpenChrom
Pazar_Chip	IMR90_Quiescent_GSE19898	none	698	19461	0.0358666	360.713	22.0387	15.3043	1.93505	3.57743e-53	8.178e-50	Null_Model_OpenChrom
Pazar_Chip	IMR90_Quiescent_GSE19898	P130	653	19461	0.0335543	332.189	20.9674	15.3005	1.96575	3.79445e-53	8.67411e-50	Null_Model_OpenChrom
TxnFactorChIPV3	HeLa-S3	RAD21	1166	19461	0.0599147	687.928	31.3228	15.2628	1.69494	6.77061e-53	1.54776e-49	Null_Model_OpenChrom
H3K4Me3_Broad	HepG2	none	5411	19461	0.278043	2806.26	170.729	15.2566	1.92819	7.44019e-53	1.70083e-49	Null_Model_OpenChrom
TxnFactorChIPV3	K562	EP300	875	19461	0.0449617	467.952	26.7636	15.209	1.86985	1.54111e-52	3.52298e-49	Null_Model_OpenChrom
TxnFactorChIPV3	PFSK-1	FOXP2	819	19461	0.0420842	411.656	26.7965	15.2014	1.98952	1.73175e-52	3.95878e-49	Null_Model_OpenChrom
TxnFactorChIPV3	K562	JUN	410	19461	0.0210678	183.096	15.0049	15.122	2.23926	5.79764e-52	1.32534e-48	Null_Model_OpenChrom
TxnFactorChIPV3	HeLa-S3	FOS	388	19461	0.0199373	170.523	14.4001	15.1025	2.27535	7.79843e-52	1.78272e-48	Null_Model_OpenChrom
Pazar_Chip	BJ_GSE26005_p05	none	39	19461	0.00200401	4.06094	2.32191	15.0475	9.60369	1.79187e-51	4.09622e-48	Null_Model_OpenChrom
TxnFactorChIPV3	SK-N-SH_RA	USF1	683	19461	0.0350958	356.981	21.7169	15.0122	1.91327	3.05389e-51	6.9812e-48	Null_Model_OpenChrom
TxnFactorChIPV3	HepG2	RAD21	1793	19461	0.092133	912.873	58.6481	15.0069	1.96413	3.30819e-51	7.56253e-48	Null_Model_OpenChrom
TxnFactorChIPV3	T-47D+BPA_100nM	none	180	19461	0.00924927	55.006	8.33378	14.9985	3.27237	3.75664e-51	8.58767e-48	Null_Model_OpenChrom
TxnFactorChIPV3	A549+EtOH_0.02pct	SIN3AK20	444	19461	0.0228149	200.445	16.2897	14.9515	2.21508	7.61677e-51	1.74119e-47	Null_Model_OpenChrom
H3K9Ac_Broad	HepG2	none	5810	19461	0.298546	3225.43	173.353	14.9093	1.80131	1.43372e-50	3.27749e-47	Null_Model_OpenChrom
DNaseClusters	HCF	none	4581	19461	0.235394	2640.52	130.225	14.901	1.73489	1.62326e-50	3.71076e-47	Null_Model_OpenChrom
TxnFactorChIPV3	T-47D+BPA_100nM	ESR1	180	19461	0.00924927	54.7702	8.41933	14.8741	3.28646	2.42828e-50	5.55106e-47	Null_Model_OpenChrom
TxnFactorChIPV3	PANC-1	TCF7L2	616	19461	0.031653	315.461	20.2397	14.849	1.9527	3.53148e-50	8.07297e-47	Null_Model_OpenChrom
Pazar_Chip	BJ_GSE26005_p05	TERF1	32	19461	0.00164431	3.05195	1.95277	14.8241	10.4851	5.11557e-50	1.16942e-46	Null_Model_OpenChrom
TxnFactorChIPV3	GM12878	NRF1	327	19461	0.0168028	132.305	13.1523	14.8031	2.47157	6.99508e-50	1.59908e-46	Null_Model_OpenChrom
DNaseClusters	HMVEC-LLy	none	3716	19461	0.190946	2151.57	105.816	14.7844	1.72711	9.22895e-50	2.10974e-46	Null_Model_OpenChrom
Pazar_Chip	IMR90_Senesecent_GSE19898	none	768	19461	0.0394635	411.761	24.1003	14.7815	1.86516	9.64281e-50	2.20435e-46	Null_Model_OpenChrom
TxnFactorChIPV3	GM12878	SIX5	290	19461	0.0149016	111.663	12.0759	14.768	2.59709	1.1785e-49	2.69405e-46	Null_Model_OpenChrom
TxnFactorChIPV3	MCF10A-Er-Src+4OHTAM_1uM_36hr	none	3185	19461	0.163661	2038.83	77.6751	14.756	1.56217	1.40779e-49	3.21822e-46	Null_Model_OpenChrom
TxnFactorChIPV3	A549+EtOH_0.02pct	YY1	554	19461	0.0284672	284.601	18.3258	14.7005	1.94658	3.19779e-49	7.31016e-46	Null_Model_OpenChrom
TxnFactorChIPV3	SK-N-MC	FOXP2	574	19461	0.0294949	285.564	19.6809	14.6556	2.01005	6.19903e-49	1.4171e-45	Null_Model_OpenChrom
DNaseClusters	MCF-7	none	4649	19461	0.238888	2796.19	126.501	14.6466	1.66262	7.08126e-49	1.61878e-45	Null_Model_OpenChrom
DNaseI_Duke	Huh-7.5	none	6477	19461	0.332819	3845.14	181.942	14.4654	1.68446	1.00224e-47	2.29113e-44	Null_Model_OpenChrom
TxnFactorChIPV3	K562	SIX5	249	19461	0.0127948	93.2537	10.8279	14.3838	2.67013	3.27092e-47	7.47733e-44	Null_Model_OpenChrom
TxnFactorChIPV3	HepG2	GABPA	546	19461	0.0280561	271.106	19.1201	14.3772	2.01397	3.59627e-47	8.22107e-44	Null_Model_OpenChrom
Pazar_Chip	IMR90_Senesecent_GSE19898	RB2	653	19461	0.0335543	332.124	22.3201	14.3761	1.96613	3.65448e-47	8.35413e-44	Null_Model_OpenChrom
TxnFactorChIPV3	HepG2	POLR2A	2212	19461	0.113663	1176.39	72.3745	14.3091	1.88033	9.60466e-47	2.19563e-43	Null_Model_OpenChrom
TxnFactorChIPV3	H1-hESC	ATF3	261	19461	0.0134114	98.4765	11.4463	14.1988	2.65038	4.66086e-46	1.06547e-42	Null_Model_OpenChrom
TxnFactorChIPV3	U2OS	KAP1	603	19461	0.030985	318.616	20.0463	14.1864	1.89256	5.56395e-46	1.27192e-42	Null_Model_OpenChrom
TxnFactorChIPV3	HeLa-S3	TFAP2C	1032	19461	0.0530291	567.66	32.7396	14.1828	1.81799	5.85455e-46	1.33835e-42	Null_Model_OpenChrom
DNaseClusters	HCM	none	4825	19461	0.247932	2858.88	138.703	14.175	1.68772	6.54183e-46	1.49546e-42	Null_Model_OpenChrom
TxnFactorChIPV3	HeLa-S3	SMARCC1	461	19461	0.0236884	228.96	16.421	14.1307	2.01345	1.22926e-45	2.81009e-42	Null_Model_OpenChrom
TxnFactorChIPV3	K562+IFNg6h	IRF1	615	19461	0.0316017	307.386	21.8861	14.0552	2.00074	3.57679e-45	8.17654e-42	Null_Model_OpenChrom
TxnFactorChIPV3	HepG2+forskolin	POLR2A	1494	19461	0.0767689	913.191	41.4173	14.0234	1.63602	5.60905e-45	1.28223e-41	Null_Model_OpenChrom
DNaseClusters	HConF	none	4088	19461	0.210061	2342	124.978	13.9704	1.74551	1.1812e-44	2.70023e-41	Null_Model_OpenChrom
TxnFactorChIPV3	HeLa-S3	NRF1	200	19461	0.010277	67.998	9.46224	13.9504	2.94126	1.56433e-44	3.57605e-41	Null_Model_OpenChrom
TxnFactorChIPV3	ECC-1+Estradiol_10nM	ESR1	541	19461	0.0277992	274.14	19.1577	13.9297	1.97345	2.09129e-44	4.78069e-41	Null_Model_OpenChrom
TxnFactorChIPV3	K562	SRF	219	19461	0.0112533	80.2637	9.98861	13.8894	2.7285	3.67018e-44	8.39002e-41	Null_Model_OpenChrom
DNaseClusters	LNCaP+androgen	none	4186	19461	0.215097	2218.86	141.784	13.8742	1.88656	4.54196e-44	1.03829e-40	Null_Model_OpenChrom
TxnFactorChIPV3	HepG2	NRF1	150	19461	0.00770772	44.9021	7.58897	13.8488	3.3406	6.46978e-44	1.47899e-40	Null_Model_OpenChrom
Misc_ChIP	IB4	none	296	19461	0.0152099	127.602	12.1892	13.8153	2.31971	1.03107e-43	2.35702e-40	Null_Model_OpenChrom
Pazar_Chip	IMR90_Senescent_GSE19898	P130	693	19461	0.0356097	389.995	21.9572	13.7998	1.77695	1.27787e-43	2.92121e-40	Null_Model_OpenChrom
Pazar_Chip	MCF7_GSE25021_oestrogen	none	2847	19461	0.146293	1937.02	66.0091	13.7857	1.46979	1.55372e-43	3.5518e-40	Null_Model_OpenChrom
TxnFactorChIPV3	HeLa-S3	SMC3	1196	19461	0.0614562	682.366	37.3093	13.7669	1.75273	2.01449e-43	4.60513e-40	Null_Model_OpenChrom
Pazar_Chip	MCF7_GSE29073	none	577	19461	0.029649	303.99	19.8588	13.7476	1.89809	2.63389e-43	6.02107e-40	Null_Model_OpenChrom
TxnFactorChIPV3	NB4	MYC	1109	19461	0.0569858	646.867	33.698	13.7139	1.71442	4.18895e-43	9.57593e-40	Null_Model_OpenChrom
TxnFactorChIPV3	K562	E2F4	452	19461	0.0232259	209.926	17.6558	13.7107	2.15314	4.37756e-43	1.00071e-39	Null_Model_OpenChrom
Pazar_Chip	IMR90_Senescent_GSE19898	none	693	19461	0.0356097	388.948	22.1852	13.7052	1.78173	4.72562e-43	1.08028e-39	Null_Model_OpenChrom
Pazar_Chip	LS180_GSE31939_Veh	RXR	61	19461	0.00313447	10.7363	3.67592	13.6738	5.68168	7.28034e-43	1.66429e-39	Null_Model_OpenChrom
TxnFactorChIPV3	HeLa-S3	ZNF143	337	19461	0.0173167	151.232	13.6254	13.634	2.22837	1.25684e-42	2.87315e-39	Null_Model_OpenChrom
TxnFactorChIPV3	HeLa-S3	GABPA	391	19461	0.0200915	187.5	14.959	13.6039	2.08534	1.89747e-42	4.33763e-39	Null_Model_OpenChrom
TxnFactorChIPV3	HCT-116	YY1	622	19461	0.0319614	323.272	21.9602	13.6031	1.92408	1.91794e-42	4.3844e-39	Null_Model_OpenChrom
DNaseClusters	NB4	none	3132	19461	0.160937	2150.1	72.2201	13.5959	1.45668	2.11665e-42	4.83866e-39	Null_Model_OpenChrom
Pazar_Chip	MCF7_GSE29073	GATA3	577	19461	0.029649	306.06	20.0558	13.5093	1.88525	6.88904e-42	1.57484e-38	Null_Model_OpenChrom
Pazar_Chip	U937_GSE29195_BIO	TCF7L2	250	19461	0.0128462	99.2408	11.161	13.5077	2.51913	7.03949e-42	1.60923e-38	Null_Model_OpenChrom
DNaseClusters	HAEpiC	none	4804	19461	0.246853	2891.51	141.646	13.5019	1.66142	7.61868e-42	1.74163e-38	Null_Model_OpenChrom
DNaseClusters	PANC-1	none	2971	19461	0.152664	1740.67	91.3696	13.4654	1.70682	1.24901e-41	2.85524e-38	Null_Model_OpenChrom
TxnFactorChIPV3	K562	BHLHE40	831	19461	0.0427008	435.73	29.4739	13.4109	1.90714	2.61178e-41	5.97053e-38	Null_Model_OpenChrom
TxnFactorChIPV3	K562	TBL1XR1	453	19461	0.0232773	219.891	17.4046	13.3935	2.06011	3.29787e-41	7.53893e-38	Null_Model_OpenChrom
TxnFactorChIPV3	ECC-1+Estradiol_10nM	none	541	19461	0.0277992	274.066	19.9342	13.3907	1.97398	3.4249e-41	7.82932e-38	Null_Model_OpenChrom
DNaseClusters	HL-60	none	3500	19461	0.179847	2206.74	96.6238	13.3845	1.58605	3.72362e-41	8.5122e-38	Null_Model_OpenChrom
DNaseClusters	HPAF	none	4649	19461	0.238888	2786.66	139.556	13.3447	1.66831	6.35671e-41	1.45314e-37	Null_Model_OpenChrom
TxnFactorChIPV3	ECC-1+Genistein_100nM	none	412	19461	0.0211705	204.577	15.5928	13.3025	2.01391	1.11942e-40	2.559e-37	Null_Model_OpenChrom
Pazar_Chip	IMR90_Senesecent_GSE19898	RB1	378	19461	0.0194235	178.355	15.0222	13.29	2.11937	1.32283e-40	3.024e-37	Null_Model_OpenChrom
TxnFactorChIPV3	NB4	MAX	1257	19461	0.0645907	764.769	37.0476	13.2864	1.64363	1.38741e-40	3.17161e-37	Null_Model_OpenChrom
TxnFactorChIPV3	SK-N-SH	SIN3AK20	727	19461	0.0373568	428.797	22.4797	13.2654	1.69544	1.83693e-40	4.19923e-37	Null_Model_OpenChrom
TxnFactorChIPV3	ECC-1+DEX_100nM	NR3C1	352	19461	0.0180875	165.686	14.0586	13.2526	2.1245	2.17901e-40	4.98122e-37	Null_Model_OpenChrom
TxnFactorChIPV3	ECC-1+DEX_100nM	none	352	19461	0.0180875	164.824	14.1672	13.2119	2.13561	3.74397e-40	8.55871e-37	Null_Model_OpenChrom
TxnFactorChIPV3	HepG2	BRCA1	129	19461	0.00662864	38.1798	6.88401	13.1929	3.37875	4.81939e-40	1.10171e-36	Null_Model_OpenChrom
Misc_ChIP	IB4	EBNALP	296	19461	0.0152099	128.179	12.7323	13.1808	2.30927	5.66202e-40	1.29434e-36	Null_Model_OpenChrom
TxnFactorChIPV3	K562	FOS	508	19461	0.0261035	267.013	18.287	13.1781	1.90253	5.86688e-40	1.34117e-36	Null_Model_OpenChrom
DNaseClusters	Monocytes-CD14+_RO01746	none	3060	19461	0.157238	1994.41	81.2115	13.1211	1.53428	1.24626e-39	2.84895e-36	Null_Model_OpenChrom
TxnFactorChIPV3	K562+IFNg30	IRF1	453	19461	0.0232773	228.18	17.265	13.0217	1.98528	4.60488e-39	1.05267e-35	Null_Model_OpenChrom
TxnFactorChIPV3	K562	USF1	562	19461	0.0288783	300.087	20.259	12.9283	1.87279	1.55899e-38	3.56384e-35	Null_Model_OpenChrom
DNaseClusters	HMVEC-dNeo	none	3486	19461	0.179127	2160.6	103.248	12.8371	1.61344	5.08128e-38	1.16158e-34	Null_Model_OpenChrom
Pazar_Chip	MCF7_GSE23852_ETOH	TFAP2C	1137	19461	0.0584245	675.762	36.0958	12.7781	1.68254	1.08597e-37	2.48252e-34	Null_Model_OpenChrom
TxnFactorChIPV3	HeLa-S3	ZKSCAN1	220	19461	0.0113047	87.8571	10.3475	12.7705	2.50407	1.19772e-37	2.73799e-34	Null_Model_OpenChrom
TxnFactorChIPV3	HeLa-S3	TFAP2A	798	19461	0.0410051	437.386	28.3012	12.742	1.82448	1.72625e-37	3.9462e-34	Null_Model_OpenChrom
TxnFactorChIPV3	U2OS	none	720	19461	0.0369971	427.77	22.9715	12.7214	1.68315	2.24826e-37	5.13951e-34	Null_Model_OpenChrom
TxnFactorChIPV3	MCF-7	E2F1	914	19461	0.0469657	535.268	29.9237	12.6566	1.70756	5.14319e-37	1.17573e-33	Null_Model_OpenChrom
Pazar_Chip	HepG2_GSE25021	STAG1	1550	19461	0.0796465	869.301	53.9458	12.6182	1.78304	8.37897e-37	1.91543e-33	Null_Model_OpenChrom
TxnFactorChIPV3	K562+IFNa6h	IRF1	363	19461	0.0186527	175.654	14.8723	12.597	2.06656	1.09695e-36	2.50763e-33	Null_Model_OpenChrom
TxnFactorChIPV3	ECC-1+Genistein_100nM	ESR1	412	19461	0.0211705	203.593	16.5497	12.5928	2.02364	1.15666e-36	2.64412e-33	Null_Model_OpenChrom
H3K4Me3_UW	HepG2	none	2266	19461	0.116438	1267.28	79.4606	12.5687	1.78808	1.56831e-36	3.58515e-33	Null_Model_OpenChrom
DNaseClusters	SKMC	none	4627	19461	0.237758	2948.56	133.597	12.5634	1.56924	1.67759e-36	3.83498e-33	Null_Model_OpenChrom
TxnFactorChIPV3	GM12878	GABPA	366	19461	0.0188068	184.79	14.4958	12.5009	1.98062	3.69259e-36	8.44126e-33	Null_Model_OpenChrom
DNaseClusters	AG10803	none	4050	19461	0.208109	2545.83	120.842	12.4474	1.59084	7.21969e-36	1.65042e-32	Null_Model_OpenChrom
DNaseClusters	HMF	none	4305	19461	0.221212	2646.48	133.368	12.4357	1.62669	8.36637e-36	1.91255e-32	Null_Model_OpenChrom
DNaseClusters	HRE	none	4410	19461	0.226607	2746.09	133.882	12.4281	1.60592	9.19312e-36	2.10155e-32	Null_Model_OpenChrom
TxnFactorChIPV3	K562	JUNB	419	19461	0.0215302	223.584	15.7356	12.4187	1.87401	1.03457e-35	2.36504e-32	Null_Model_OpenChrom
TxnFactorChIPV3	GM12878	SRF	328	19461	0.0168542	155.792	13.886	12.4015	2.10537	1.28162e-35	2.92979e-32	Null_Model_OpenChrom
TxnFactorChIPV3	HEK293	KAP1	611	19461	0.0313961	361.674	20.1088	12.3988	1.68937	1.32577e-35	3.0307e-32	Null_Model_OpenChrom
TxnFactorChIPV3	GM12878	ELK1	307	19461	0.0157751	141.859	13.4071	12.3175	2.16412	3.64784e-35	8.33897e-32	Null_Model_OpenChrom
TxnFactorChIPV3	K562	SP1	338	19461	0.0173681	161.315	14.3614	12.3028	2.09528	4.37494e-35	1.00011e-31	Null_Model_OpenChrom
TxnFactorChIPV3	K562+IFNa6h	MYC	528	19461	0.0271312	291.687	19.2098	12.3017	1.81016	4.43466e-35	1.01376e-31	Null_Model_OpenChrom
TxnFactorChIPV3	SK-N-SH	TAF1	695	19461	0.0357125	424.491	21.995	12.2987	1.63726	4.60335e-35	1.05233e-31	Null_Model_OpenChrom
DNaseClusters	PrEC	none	4000	19461	0.205539	2352.71	134.093	12.2847	1.70017	5.47256e-35	1.25103e-31	Null_Model_OpenChrom
TxnFactorChIPV3	K562+IFNa30	MYC	422	19461	0.0216844	222.959	16.2131	12.2766	1.89272	6.05018e-35	1.38307e-31	Null_Model_OpenChrom
TxnFactorChIPV3	K562+IFNa30	STAT2	156	19461	0.00801603	59.1908	7.90219	12.2509	2.63554	8.30332e-35	1.89814e-31	Null_Model_OpenChrom
TxnFactorChIPV3	GM12878	ETS1	245	19461	0.0125893	104.161	11.4997	12.2472	2.35213	8.69453e-35	1.98757e-31	Null_Model_OpenChrom
TxnFactorChIPV3	GM12878	ATF3	115	19461	0.00590925	36.2308	6.43364	12.2433	3.1741	9.11819e-35	2.08442e-31	Null_Model_OpenChrom
DNaseClusters	HCPEpiC	none	4849	19461	0.249165	3046.08	147.369	12.234	1.59188	1.02271e-34	2.33791e-31	Null_Model_OpenChrom
TxnFactorChIPV3	GM12878	SP1	673	19461	0.034582	396.908	22.5929	12.2203	1.69561	1.21109e-34	2.76856e-31	Null_Model_OpenChrom
DNaseClusters	AoAF	none	4127	19461	0.212065	2583.57	126.759	12.1761	1.5974	2.08312e-34	4.762e-31	Null_Model_OpenChrom
DNaseClusters	NHDF-Ad	none	4655	19461	0.239196	3201.87	119.744	12.1353	1.45384	3.43206e-34	7.84568e-31	Null_Model_OpenChrom
Pazar_Chip	CD34_GSE29194_prog	SMAD1	510	19461	0.0262063	283.674	18.6613	12.128	1.79784	3.75087e-34	8.5745e-31	Null_Model_OpenChrom
DNaseClusters	WI-38	none	3868	19461	0.198756	2463.91	116.385	12.0642	1.56986	8.16425e-34	1.86635e-30	Null_Model_OpenChrom
DNaseClusters	HeLa-S3+IFNa4h	none	2991	19461	0.153692	1760.48	102.417	12.0148	1.69897	1.48558e-33	3.39603e-30	Null_Model_OpenChrom
DNaseClusters	SAEC	none	4460	19461	0.229176	2778.34	140.378	11.9795	1.60528	2.27431e-33	5.19908e-30	Null_Model_OpenChrom
BroadChromHMM	HepG2	WeakPromoter	1767	19461	0.090797	1173.36	49.6514	11.9561	1.50593	3.01511e-33	6.89254e-30	Null_Model_OpenChrom
Pazar_Chip	IMR90_shRbSenescent_GSE19898	P130	755	19461	0.0387955	469.309	23.9301	11.9386	1.60875	3.72436e-33	8.51388e-30	Null_Model_OpenChrom
TxnFactorChIPV3	HeLa-S3	MAZ	687	19461	0.0353014	389.043	24.9767	11.9294	1.76587	4.15836e-33	9.506e-30	Null_Model_OpenChrom
TxnFactorChIPV3	H1-hESC	NRF1	238	19461	0.0122296	104.792	11.1707	11.9247	2.27116	4.39805e-33	1.00539e-29	Null_Model_OpenChrom
TxnFactorChIPV3	MCF-7+serum_stimulated_media	MYC	913	19461	0.0469143	568.153	28.9541	11.9101	1.60696	5.24132e-33	1.19817e-29	Null_Model_OpenChrom
Roadmapepigenomics	Fetal_Intestine_Large	none	6862	19461	0.352603	4004.38	240.395	11.8872	1.71362	6.89817e-33	1.57692e-29	Null_Model_OpenChrom
DNaseClusters	HIPEpiC	none	4942	19461	0.253944	3194.83	147.25	11.8653	1.54687	8.95947e-33	2.04813e-29	Null_Model_OpenChrom
DNaseClusters	HMVEC-dAd	none	3108	19461	0.159704	1927.83	99.8683	11.8172	1.61217	1.58968e-32	3.63402e-29	Null_Model_OpenChrom
TxnFactorChIPV3	K562	PML	611	19461	0.0313961	366.016	20.7821	11.7882	1.66933	2.24388e-32	5.1295e-29	Null_Model_OpenChrom
Pazar_Chip	CD34_GSE29194_prog	GATA2	674	19461	0.0346334	415.891	21.9227	11.7736	1.62062	2.67025e-32	6.1042e-29	Null_Model_OpenChrom
TxnFactorChIPV3	HeLa-S3	NFYB	287	19461	0.0147474	144.64	12.1122	11.7534	1.98423	3.38993e-32	7.74938e-29	Null_Model_OpenChrom
DNaseClusters	Caco-2	none	2924	19461	0.150249	1973.09	80.9376	11.7486	1.48194	3.58889e-32	8.2042e-29	Null_Model_OpenChrom
TxnFactorChIPV3	K562	THAP1	183	19461	0.00940342	74.3057	9.2799	11.7129	2.4628	5.47476e-32	1.25153e-28	Null_Model_OpenChrom
TxnFactorChIPV3	K562	TBP	729	19461	0.0374595	414.661	26.8471	11.7085	1.75806	5.76739e-32	1.31843e-28	Null_Model_OpenChrom
Pazar_Chip	CD34_GSE29194_prog	none	975	19461	0.0501002	648.95	27.89	11.6906	1.50243	7.1224e-32	1.62818e-28	Null_Model_OpenChrom
Pazar_Chip	U20S_GSE21770_DoxycyclineandE2	Erbeta	375	19461	0.0192693	201.184	14.8905	11.673	1.86397	8.75892e-32	2.00229e-28	Null_Model_OpenChrom
TxnFactorChIPV3	HeLa-S3	NR2C2	133	19461	0.00683418	46.7782	7.38774	11.6709	2.8432	8.9735e-32	2.05134e-28	Null_Model_OpenChrom
TxnFactorChIPV3	HeLa-S3	SMARCC2	168	19461	0.00863265	66.7992	8.68497	11.6524	2.515	1.11528e-31	2.54954e-28	Null_Model_OpenChrom
TxnFactorChIPV3	K562+IFNa30	JUN	328	19461	0.0168542	163.836	14.0912	11.6501	2.002	1.14569e-31	2.61904e-28	Null_Model_OpenChrom
TxnFactorChIPV3	HCT-116	TCF7L2	837	19461	0.0430091	479.316	30.7184	11.644	1.74624	1.2315e-31	2.8152e-28	Null_Model_OpenChrom
DNaseClusters	HCFaa	none	4087	19461	0.21001	2627.74	125.613	11.6172	1.55533	1.68597e-31	3.85412e-28	Null_Model_OpenChrom
TxnFactorChIPV3	HeLa-S3	NFYA	281	19461	0.0144391	135.657	12.5216	11.6073	2.0714	1.89148e-31	4.32392e-28	Null_Model_OpenChrom
Pazar_Chip	U20S_GSE21770_DoxycyclineandE2	none	375	19461	0.0192693	201.881	14.9574	11.5741	1.85753	2.78758e-31	6.37242e-28	Null_Model_OpenChrom
TxnFactorChIPV3	H1-hESC	MYC	310	19461	0.0159293	152.249	13.7333	11.4868	2.03614	7.68649e-31	1.75713e-27	Null_Model_OpenChrom
TxnFactorChIPV3	K562	TEAD4	798	19461	0.0410051	495.6	26.33	11.485	1.61017	7.84927e-31	1.79434e-27	Null_Model_OpenChrom
Pazar_Chip	IMR90_shRbSenescent_GSE19898	none	755	19461	0.0387955	468.379	24.9576	11.4843	1.61194	7.90736e-31	1.80762e-27	Null_Model_OpenChrom
Pazar_Chip	Caco-2_GSE23436_proliferating	none	7567	19461	0.388829	4847.1	237.001	11.4763	1.56114	8.67278e-31	1.9826e-27	Null_Model_OpenChrom
Pazar_Chip	H9_GSE31006_REP2	FOXP1	236	19461	0.0121268	108.311	11.1285	11.474	2.17892	8.90708e-31	2.03616e-27	Null_Model_OpenChrom
TxnFactorChIPV3	GM12878	USF2	348	19461	0.0178819	178.545	14.8271	11.4287	1.94908	1.50338e-30	3.43672e-27	Null_Model_OpenChrom
Pazar_Chip	HepG2_GSE25021	RAD21	918	19461	0.0471713	515.101	35.2782	11.4206	1.78218	1.64904e-30	3.7697e-27	Null_Model_OpenChrom
DNaseClusters	AG04450	none	3494	19461	0.179539	2248.25	109.105	11.4179	1.5541	1.70229e-30	3.89144e-27	Null_Model_OpenChrom
Pazar_Chip	U20S_GSE21770_Doxycycline	Erbeta	238	19461	0.0122296	110.537	11.1992	11.3814	2.15312	2.58923e-30	5.91898e-27	Null_Model_OpenChrom
TxnFactorChIPV3	K562	MXI1	342	19461	0.0175736	177.068	14.6114	11.2879	1.93146	7.53015e-30	1.72139e-26	Null_Model_OpenChrom
DNaseClusters	HEEpiC	none	4406	19461	0.226402	2920.56	131.638	11.2842	1.50861	7.84969e-30	1.79444e-26	Null_Model_OpenChrom
TxnFactorChIPV3	GM12878	TBP	581	19461	0.0298546	355.642	19.9896	11.2737	1.63366	8.84399e-30	2.02174e-26	Null_Model_OpenChrom
TxnFactorChIPV3	K562	GTF2B	160	19461	0.00822157	64.3397	8.49038	11.2669	2.4868	9.55785e-30	2.18492e-26	Null_Model_OpenChrom
DNaseClusters	NHDF-neo	none	4098	19461	0.210575	2673.69	126.64	11.2469	1.53271	1.19978e-29	2.74269e-26	Null_Model_OpenChrom
TxnFactorChIPV3	GM12878	E2F4	208	19461	0.010688	93.2677	10.2459	11.1979	2.23014	2.08797e-29	4.7731e-26	Null_Model_OpenChrom
Pazar_Chip	U20S_GSE21770_Doxycycline	none	238	19461	0.0122296	110.78	11.3659	11.1931	2.1484	2.20344e-29	5.03706e-26	Null_Model_OpenChrom
Pazar_Chip	H9_GSE31006_REP2	none	236	19461	0.0121268	108.345	11.4173	11.1809	2.17823	2.5288e-29	5.78083e-26	Null_Model_OpenChrom
Pazar_Chip	U20S_GSE21770	ESR2	238	19461	0.0122296	110.25	11.4539	11.1534	2.15874	3.44455e-29	7.87425e-26	Null_Model_OpenChrom
Pazar_Chip	U20S_GSE21770	none	238	19461	0.0122296	111.111	11.3801	11.1501	2.142	3.57683e-29	8.17662e-26	Null_Model_OpenChrom
Pazar_Chip	SKOV-3_GSE25210	none	971	19461	0.0498947	550.746	37.8013	11.1175	1.76306	5.15882e-29	1.17931e-25	Null_Model_OpenChrom
TxnFactorChIPV3	K562	TAF1	705	19461	0.0362263	433.376	24.5053	11.0843	1.62676	7.47407e-29	1.70857e-25	Null_Model_OpenChrom
TxnFactorChIPV3	K562	BCLAF1	211	19461	0.0108422	97.4446	10.2767	11.0498	2.16533	1.09895e-28	2.5122e-25	Null_Model_OpenChrom
TxnFactorChIPV3	K562+IFNg30	JUN	295	19461	0.0151585	153.926	12.7778	11.0405	1.9165	1.21787e-28	2.78404e-25	Null_Model_OpenChrom
TxnFactorChIPV3	GM12878	CHD2	604	19461	0.0310364	378.143	20.5021	11.0163	1.59728	1.59473e-28	3.64555e-25	Null_Model_OpenChrom
Pazar_Chip	IMR90_Quiescent_GSE19898	RB1	192	19461	0.00986589	85.2498	9.70142	11.0036	2.25221	1.83651e-28	4.19826e-25	Null_Model_OpenChrom
TxnFactorChIPV3	A549+EtOH_0.02pct	none	3688	19461	0.189507	2608.63	98.2156	10.9898	1.41377	2.13998e-28	4.89199e-25	Null_Model_OpenChrom
FANTOM5_enhancer_cell	intestinal_epithelial_cell	none	84	19461	0.00431632	25.975	5.31285	10.9216	3.23388	4.5426e-28	1.03844e-24	Null_Model_OpenChrom
TxnFactorChIPV3	MCF10A-Er-Src+EtOH_0.01pct	none	3434	19461	0.176455	2058.27	125.983	10.92	1.66839	4.62691e-28	1.05771e-24	Null_Model_OpenChrom
TxnFactorChIPV3	PBDE	GATA1	622	19461	0.0319614	400.423	20.315	10.9071	1.55336	5.33185e-28	1.21886e-24	Null_Model_OpenChrom
Pazar_Chip	MCF7_GSE23852	TFAP2C	1532	19461	0.0787215	1031.72	46.0309	10.8684	1.48491	8.14787e-28	1.8626e-24	Null_Model_OpenChrom
TxnFactorChIPV3	GM12878	USF1	367	19461	0.0188582	203.518	15.114	10.8165	1.80328	1.43711e-27	3.28524e-24	Null_Model_OpenChrom
TxnFactorChIPV3	GM12891	TAF1	579	19461	0.0297518	360.597	20.2003	10.8118	1.60567	1.51269e-27	3.458e-24	Null_Model_OpenChrom
TxnFactorChIPV3	H1-hESC	TBP	688	19461	0.0353528	441.327	22.8272	10.8061	1.55894	1.61032e-27	3.6812e-24	Null_Model_OpenChrom
DNaseClusters	HCT-116	none	2600	19461	0.133601	1714.59	82.0216	10.7949	1.5164	1.81983e-27	4.16013e-24	Null_Model_OpenChrom
TxnFactorChIPV3	K562	CBX3	556	19461	0.02857	333.493	20.6334	10.7839	1.6672	2.05143e-27	4.68957e-24	Null_Model_OpenChrom
DNaseI_Duke	MCF7+CTCF_shRNA_knockdown	none	3717	19461	0.190997	2323.16	129.294	10.7804	1.59997	2.13116e-27	4.87184e-24	Null_Model_OpenChrom
TxnFactorChIPV3	K562	MAFK	379	19461	0.0194748	214.022	15.3187	10.7697	1.77085	2.39179e-27	5.46763e-24	Null_Model_OpenChrom
Pazar_Chip	IMR90_Growing_GSE19898	RB1	192	19461	0.00986589	87.6414	9.75491	10.6981	2.19075	5.19633e-27	1.18788e-23	Null_Model_OpenChrom
TxnFactorChIPV3	H1-hESC	CHD2	319	19461	0.0163918	171.624	13.7851	10.6909	1.85871	5.61125e-27	1.28273e-23	Null_Model_OpenChrom
TxnFactorChIPV3	GM12878	BHLHE40	501	19461	0.0257438	298.202	18.9889	10.6798	1.68007	6.32414e-27	1.4457e-23	Null_Model_OpenChrom
TxnFactorChIPV3	K562	TRIM28	365	19461	0.0187555	203.695	15.2051	10.6086	1.79189	1.35941e-26	3.10762e-23	Null_Model_OpenChrom
TxnFactorChIPV3	U87	REST	491	19461	0.0252299	291.093	18.8586	10.6003	1.68675	1.48479e-26	3.39424e-23	Null_Model_OpenChrom
Pazar_Chip	MCF7_GSE23852	none	1532	19461	0.0787215	1031.84	47.4881	10.5324	1.48473	3.06153e-26	6.99866e-23	Null_Model_OpenChrom
Pazar_Chip	SKOV-3_GSE25210	EVI1	971	19461	0.0498947	552.195	39.7691	10.5309	1.75844	3.11093e-26	7.11158e-23	Null_Model_OpenChrom
DNaseClusters	HPdLF	none	3883	19461	0.199527	2465.56	134.785	10.5163	1.5749	3.63315e-26	8.30539e-23	Null_Model_OpenChrom
TxnFactorChIPV3	K562	FOSL1	317	19461	0.016289	170.668	13.9328	10.5027	1.8574	4.19709e-26	9.59454e-23	Null_Model_OpenChrom
TxnFactorChIPV3	GM12878	MXI1	715	19461	0.0367401	467.565	23.6041	10.4827	1.5292	5.18645e-26	1.18562e-22	Null_Model_OpenChrom
Pazar_Chip	IMR90_Growing_GSE19898	none	192	19461	0.00986589	87.5934	9.96281	10.4796	2.19195	5.35773e-26	1.22478e-22	Null_Model_OpenChrom
DNaseClusters	AoSMC+serum_free_media	none	3897	19461	0.200247	2458.1	137.772	10.444	1.58537	7.80059e-26	1.78321e-22	Null_Model_OpenChrom
BroadChromHMM	HepG2	ActivePromoter	1362	19461	0.0699861	923.1	42.1415	10.4149	1.47546	1.06001e-25	2.42318e-22	Null_Model_OpenChrom
Roadmapepigenomics	A549_EtOH_0.02pct_Lung_Carcinoma	none	6113	19461	0.314115	4244.82	179.872	10.3862	1.44011	1.43314e-25	3.27616e-22	Null_Model_OpenChrom
Roadmapepigenomics	Fetal_Intestine_Small	none	6993	19461	0.359334	4343.55	255.807	10.3572	1.60997	1.94061e-25	4.43623e-22	Null_Model_OpenChrom
TxnFactorChIPV3	HeLa-S3	none	5053	19461	0.259648	3719	128.998	10.3412	1.3587	2.29263e-25	5.24096e-22	Null_Model_OpenChrom
TxnFactorChIPV3	HeLa-S3	E2F4	173	19461	0.00888957	78.8521	9.1467	10.2931	2.19398	3.78515e-25	8.65285e-22	Null_Model_OpenChrom
TxnFactorChIPV3	SK-N-SH_RA	YY1	629	19461	0.0323211	393.103	23.0041	10.2546	1.60009	5.64387e-25	1.29019e-21	Null_Model_OpenChrom
TxnFactorChIPV3	K562	CHD2	334	19461	0.0171625	180.638	14.9995	10.2244	1.849	7.70516e-25	1.7614e-21	Null_Model_OpenChrom
TxnFactorChIPV3	HUVEC	MYC	273	19461	0.0140281	144.658	12.5604	10.218	1.88721	8.23728e-25	1.88304e-21	Null_Model_OpenChrom
TxnFactorChIPV3	K562	ELK1	168	19461	0.00863265	73.7343	9.25448	10.186	2.27845	1.14541e-24	2.61842e-21	Null_Model_OpenChrom
TxnFactorChIPV3	H1-hESC	BRCA1	119	19461	0.00611479	46.2128	7.15553	10.1722	2.57504	1.32e-24	3.01752e-21	Null_Model_OpenChrom
TxnFactorChIPV3	K562	GTF2F1	199	19461	0.0102256	95.1578	10.2204	10.1603	2.09126	1.49141e-24	3.40935e-21	Null_Model_OpenChrom
Roadmapepigenomics	Stomach_Mucosa	none	6392	19461	0.328452	3956.99	240.666	10.1178	1.61537	2.30259e-24	5.26372e-21	Null_Model_OpenChrom
TxnFactorChIPV3	PANC-1	POLR2A	731	19461	0.0375623	465.496	26.2665	10.1081	1.57037	2.54282e-24	5.81288e-21	Null_Model_OpenChrom
DNaseClusters	BJ	none	3526	19461	0.181183	2384.22	113.582	10.0524	1.47889	4.48158e-24	1.02449e-20	Null_Model_OpenChrom
TxnFactorChIPV3	MCF10A-Er-Src+EtOH_0.01pct	POLR2A	1283	19461	0.0659267	885.58	39.7257	10.0041	1.44877	7.31143e-24	1.67139e-20	Null_Model_OpenChrom
TxnFactorChIPV3	IMR90	none	4095	19461	0.210421	2651.23	144.637	9.98203	1.54457	9.13434e-24	2.08811e-20	Null_Model_OpenChrom
TxnFactorChIPV3	GM12892	TAF1	488	19461	0.0250758	304.801	18.4431	9.9332	1.60104	1.49265e-23	3.41219e-20	Null_Model_OpenChrom
Pazar_Chip	H9_GSE31006_REP1	none	225	19461	0.0115616	112.295	11.3672	9.91492	2.00366	1.79263e-23	4.09795e-20	Null_Model_OpenChrom
TxnFactorChIPV3	GM12878	MAX	587	19461	0.0301629	371.831	21.7701	9.88367	1.57867	2.45015e-23	5.60104e-20	Null_Model_OpenChrom
DNaseClusters	AG09309	none	4280	19461	0.219927	2922.69	137.44	9.87565	1.46441	2.65445e-23	6.06807e-20	Null_Model_OpenChrom
TxnFactorChIPV3	HepG2+forskolin	GRp20	54	19461	0.00277478	14.2288	4.04903	9.82242	3.79513	4.5077e-23	1.03046e-19	Null_Model_OpenChrom
TxnFactorChIPV3	K562+IFNg6h	MYC	813	19461	0.0417759	501.863	31.9269	9.7453	1.61996	9.6602e-23	2.20832e-19	Null_Model_OpenChrom
Pazar_Chip	H9_GSE31006_REP1	FOXP1	225	19461	0.0115616	112.95	11.5336	9.7151	1.99203	1.29991e-22	2.9716e-19	Null_Model_OpenChrom
TxnFactorChIPV3	K562	JUND	1465	19461	0.0752788	850.348	63.8875	9.62085	1.72282	3.26441e-22	7.46245e-19	Null_Model_OpenChrom
FANTOM5_enhancer_cell	fat_cell	none	125	19461	0.0064231	51.4505	7.6459	9.61946	2.42952	3.30883e-22	7.56399e-19	Null_Model_OpenChrom
TxnFactorChIPV3	GM12878	SIN3A	496	19461	0.0254869	319.883	18.3539	9.59559	1.55057	4.17204e-22	9.53728e-19	Null_Model_OpenChrom
TxnFactorChIPV3	K562+IFNg6h	STAT1	118	19461	0.00606341	49.3786	7.15301	9.59336	2.3897	4.26304e-22	9.74531e-19	Null_Model_OpenChrom
TxnFactorChIPV3	GM12878	RFX5	204	19461	0.0104825	99.8611	10.8655	9.58434	2.04284	4.65275e-22	1.06362e-18	Null_Model_OpenChrom
H3K4Me3_Broad	A549	none	4808	19461	0.247058	3449.91	142.02	9.56265	1.39366	5.73913e-22	1.31196e-18	Null_Model_OpenChrom
TxnFactorChIPV3	K562	USF2	137	19461	0.00703972	57.6384	8.35159	9.50258	2.37689	1.0238e-21	2.34042e-18	Null_Model_OpenChrom
DNaseI_Duke	Hepatocytes	none	6655	19461	0.341966	4444.71	232.804	9.49425	1.49729	1.10901e-21	2.53521e-18	Null_Model_OpenChrom
Pazar_Chip	IMR90_shRbQuiescent_GSE19898	none	351	19461	0.0180361	208.121	15.0864	9.47075	1.68652	1.38926e-21	3.17585e-18	Null_Model_OpenChrom
H3K27Ac_SYDH	MCF-7	none	1134	19461	0.0582704	762.828	39.2021	9.46815	1.48657	1.42422e-21	3.25576e-18	Null_Model_OpenChrom
Pazar_Chip	LS180_GSE31939_Veh	TCF4	93	19461	0.00477879	33.8302	6.26651	9.44223	2.74903	1.8246e-21	4.17104e-18	Null_Model_OpenChrom
TxnFactorChIPV3	GM12891	POU2F2	471	19461	0.0242023	300.568	18.1042	9.41393	1.56703	2.38959e-21	5.46261e-18	Null_Model_OpenChrom
Pazar_Chip	IMR90_shRbQuiescent_GSE19898	P130	351	19461	0.0180361	208.029	15.2967	9.34651	1.68726	4.52959e-21	1.03546e-17	Null_Model_OpenChrom
TxnFactorChIPV3	GM12892	PAX5	393	19461	0.0201942	236.453	16.7502	9.34603	1.66207	4.55018e-21	1.04017e-17	Null_Model_OpenChrom
TxnFactorChIPV3	GM12878	BRCA1	49	19461	0.00251786	13.5275	3.79572	9.3454	3.62226	4.57713e-21	1.04633e-17	Null_Model_OpenChrom
TxnFactorChIPV3	K562	MAFF	400	19461	0.0205539	242.233	16.9003	9.3352	1.6513	5.04023e-21	1.1522e-17	Null_Model_OpenChrom
DNaseClusters	HFF	none	4041	19461	0.207646	2894.19	122.917	9.32995	1.39625	5.29623e-21	1.21072e-17	Null_Model_OpenChrom
TxnFactorChIPV3	H1-hESC	TAF7	397	19461	0.0203998	244.682	16.3641	9.30802	1.62251	6.51199e-21	1.48864e-17	Null_Model_OpenChrom
H3K9Ac_Broad	A549	none	4569	19461	0.234777	3409.83	124.842	9.28514	1.33995	8.07489e-21	1.84592e-17	Null_Model_OpenChrom
TxnFactorChIPV3	GM12878	PML	633	19461	0.0325266	430.481	21.8362	9.27448	1.47045	8.92426e-21	2.04009e-17	Null_Model_OpenChrom
TxnFactorChIPV3	H1-hESC	GTF2F1	189	19461	0.00971173	95.6873	10.0802	9.257	1.97518	1.05133e-20	2.40333e-17	Null_Model_OpenChrom
FANTOM5_enhancer_cell	mesenchymal_cell	none	299	19461	0.0153641	173.899	13.5422	9.23787	1.71939	1.25731e-20	2.87422e-17	Null_Model_OpenChrom
TxnFactorChIPV3	PFSK-1	none	1092	19461	0.0561122	725.89	39.6446	9.2348	1.50436	1.29385e-20	2.95774e-17	Null_Model_OpenChrom
DNaseClusters	HMVEC-dLy-Neo	none	3350	19461	0.172139	2305.81	113.463	9.20289	1.45285	1.74231e-20	3.98292e-17	Null_Model_OpenChrom
TxnFactorChIPV3	H1-hESC	JUND	460	19461	0.023637	292.469	18.2209	9.19447	1.57282	1.8843e-20	4.30751e-17	Null_Model_OpenChrom
FANTOM5_enhancer_cell	epithelial_cell_of_prostate	none	100	19461	0.00513848	40.8511	6.44056	9.1838	2.44791	2.08061e-20	4.75628e-17	Null_Model_OpenChrom
TxnFactorChIPV3	H1-hESC	SIX5	151	19461	0.00775911	71.2138	8.72137	9.14836	2.12038	2.8902e-20	6.60701e-17	Null_Model_OpenChrom
TxnFactorChIPV3	SK-N-SH	REST	793	19461	0.0407482	536.557	28.0514	9.14189	1.47794	3.06843e-20	7.01442e-17	Null_Model_OpenChrom
TxnFactorChIPV3	K562+IFNg6h	JUN	220	19461	0.0113047	116.748	11.3142	9.12588	1.8844	3.55795e-20	8.13348e-17	Null_Model_OpenChrom
TxnFactorChIPV3	GM12878	POU2F2	657	19461	0.0337598	450.033	22.8571	9.05483	1.45989	6.83877e-20	1.56334e-16	Null_Model_OpenChrom
TxnFactorChIPV3	ECC-1+BPA_100nM	none	163	19461	0.00837573	78.2338	9.39485	9.02262	2.0835	9.18193e-20	2.09899e-16	Null_Model_OpenChrom
TxnFactorChIPV3	GM12878	TAF1	626	19461	0.0321669	424.562	22.3276	9.0219	1.47446	9.24251e-20	2.11284e-16	Null_Model_OpenChrom
TxnFactorChIPV3	ECC-1+BPA_100nM	ESR1	163	19461	0.00837573	78.4905	9.3674	9.02166	2.07668	9.26299e-20	2.11752e-16	Null_Model_OpenChrom
TxnFactorChIPV3	K562	ARID3A	269	19461	0.0138225	150.586	13.1275	9.02028	1.78635	9.38029e-20	2.14433e-16	Null_Model_OpenChrom
TxnFactorChIPV3	HeLa-S3	SMARCA4	97	19461	0.00498433	38.4775	6.49706	9.00754	2.52095	1.05368e-19	2.40871e-16	Null_Model_OpenChrom
TxnFactorChIPV3	GM12878	RXRA	82	19461	0.00421356	31.2288	5.64629	8.99196	2.62578	1.2143e-19	2.7759e-16	Null_Model_OpenChrom
Pazar_Chip	LS180_GSE31939_125	RXR	80	19461	0.00411079	28.5834	5.7227	8.98467	2.79883	1.29752e-19	2.96612e-16	Null_Model_OpenChrom
TxnFactorChIPV3	K562	ETS1	431	19461	0.0221469	260.308	19.1172	8.92871	1.65573	2.1551e-19	4.92655e-16	Null_Model_OpenChrom
Roadmapepigenomics	Pancreas	none	5958	19461	0.306151	3992.59	220.712	8.90484	1.49226	2.67327e-19	6.11109e-16	Null_Model_OpenChrom
DNaseClusters	HRPEpiC	none	4122	19461	0.211808	2989.25	128.703	8.80127	1.37894	6.76402e-19	1.54626e-15	Null_Model_OpenChrom
TxnFactorChIPV3	K562+IFNg30	STAT1	99	19461	0.0050871	41.2138	6.56767	8.79859	2.40211	6.92725e-19	1.58357e-15	Null_Model_OpenChrom
TxnFactorChIPV3	K562	STAT5A	278	19461	0.014285	158.911	13.5658	8.77861	1.74941	8.27541e-19	1.89176e-15	Null_Model_OpenChrom
TxnFactorChIPV3	IMR90	MAFK	549	19461	0.0282103	374.919	19.8593	8.76571	1.46432	9.28053e-19	2.12153e-15	Null_Model_OpenChrom
TxnFactorChIPV3	GM12891	YY1	525	19461	0.026977	355.497	19.4059	8.73462	1.47681	1.22236e-18	2.79431e-15	Null_Model_OpenChrom
FANTOM5_enhancer_cell	monocyte	none	323	19461	0.0165973	195.651	14.602	8.7213	1.6509	1.37517e-18	3.14363e-15	Null_Model_OpenChrom
TxnFactorChIPV3	HeLa-S3	E2F6	253	19461	0.0130004	144.141	12.4908	8.71517	1.75523	1.45159e-18	3.31833e-15	Null_Model_OpenChrom
TxnFactorChIPV3	GM12878	FOS	117	19461	0.00601202	51.2507	7.56254	8.69407	2.28289	1.74847e-18	3.99701e-15	Null_Model_OpenChrom
TxnFactorChIPV3	K562	NFE2	96	19461	0.00493294	39.8072	6.46543	8.69127	2.41162	1.79203e-18	4.09659e-15	Null_Model_OpenChrom
TxnFactorChIPV3	K562	RFX5	108	19461	0.00554956	45.8462	7.15935	8.68149	2.3557	1.95306e-18	4.46469e-15	Null_Model_OpenChrom
Pazar_Chip	LS180_GSE31939_125	TCF4	97	19461	0.00498433	38.5734	6.73193	8.67903	2.51468	1.99587e-18	4.56256e-15	Null_Model_OpenChrom
TxnFactorChIPV3	PBDE	POLR2A	893	19461	0.0458866	668.143	25.951	8.66468	1.33654	2.26391e-18	5.1753e-15	Null_Model_OpenChrom
TxnFactorChIPV3	K562+IFNa6h	JUN	185	19461	0.00950619	97.0519	10.165	8.65204	1.9062	2.52927e-18	5.78191e-15	Null_Model_OpenChrom
TxnFactorChIPV3	PBDE	none	1227	19461	0.0630492	926.471	34.7571	8.64656	1.32438	2.65379e-18	6.06657e-15	Null_Model_OpenChrom
TxnFactorChIPV3	K562+IFNa30	STAT1	82	19461	0.00421356	30.9071	5.92152	8.62835	2.65311	3.11222e-18	7.11453e-15	Null_Model_OpenChrom
DNaseClusters	HMVEC-dBl-Ad	none	3331	19461	0.171163	2411.54	106.677	8.61911	1.38128	3.37377e-18	7.71245e-15	Null_Model_OpenChrom
TxnFactorChIPV3	K562	SIN3AK20	546	19461	0.0280561	351.764	22.5529	8.61244	1.55218	3.576e-18	8.17473e-15	Null_Model_OpenChrom
TxnFactorChIPV3	H1-hESC	TAF1	811	19461	0.0416731	565.502	28.581	8.58953	1.43412	4.36623e-18	9.98121e-15	Null_Model_OpenChrom
TxnFactorChIPV3	H1-hESC	KDM5A	92	19461	0.0047274	37.5045	6.35596	8.57392	2.45304	5.00097e-18	1.14322e-14	Null_Model_OpenChrom
TxnFactorChIPV3	H1-hESC	MAX	405	19461	0.0208109	260.258	16.9368	8.54602	1.55615	6.37047e-18	1.45629e-14	Null_Model_OpenChrom
TxnFactorChIPV3	GM12878	BCLAF1	259	19461	0.0133087	148.215	12.9772	8.53693	1.74746	6.89146e-18	1.57539e-14	Null_Model_OpenChrom
TxnFactorChIPV3	K562	ZNF143	735	19461	0.0377678	497.338	27.8784	8.52496	1.47787	7.64316e-18	1.74723e-14	Null_Model_OpenChrom
TxnFactorChIPV3	H1-hESC	SP1	466	19461	0.0239453	312.493	18.0117	8.52264	1.49124	7.79764e-18	1.78254e-14	Null_Model_OpenChrom
TxnFactorChIPV3	K562	GABPA	544	19461	0.0279533	332.54	24.9851	8.46343	1.63589	1.29813e-17	2.96753e-14	Null_Model_OpenChrom
Pazar_Chip	H1_GSE17917	TAF1	574	19461	0.0294949	381.88	22.7116	8.4591	1.50309	1.34723e-17	3.07977e-14	Null_Model_OpenChrom
TxnFactorChIPV3	GM12878	EGR1	531	19461	0.0272853	351.321	21.2877	8.44051	1.51144	1.57984e-17	3.61152e-14	Null_Model_OpenChrom
TxnFactorChIPV3	K562	KDM5B	616	19461	0.031653	395.692	26.1274	8.43205	1.55677	1.69824e-17	3.88219e-14	Null_Model_OpenChrom
TxnFactorChIPV3	HeLa-S3	SMARCB1	378	19461	0.0194235	244.846	15.8082	8.4231	1.54383	1.83323e-17	4.19075e-14	Null_Model_OpenChrom
DNaseClusters	HBMEC	none	3984	19461	0.204717	2890.6	130.086	8.40517	1.37826	2.13623e-17	4.88343e-14	Null_Model_OpenChrom
TxnFactorChIPV3	GM12878	PBX3	276	19461	0.0141822	164.526	13.268	8.40169	1.67754	2.2005e-17	5.03035e-14	Null_Model_OpenChrom
TxnFactorChIPV3	K562	MEF2A	161	19461	0.00827296	83.4296	9.23782	8.39705	1.92977	2.28916e-17	5.23301e-14	Null_Model_OpenChrom
TxnFactorChIPV3	H1-hESC	MXI1	283	19461	0.0145419	171.733	13.3023	8.36446	1.6479	3.01956e-17	6.90272e-14	Null_Model_OpenChrom
TxnFactorChIPV3	PANC-1	none	1193	19461	0.0613021	839.158	42.3213	8.36086	1.42166	3.11312e-17	7.11659e-14	Null_Model_OpenChrom
TxnFactorChIPV3	H1-hESC	SRF	153	19461	0.00786188	77.9271	8.99153	8.34929	1.96337	3.43371e-17	7.84946e-14	Null_Model_OpenChrom
TxnFactorChIPV3	K562	ELF1	892	19461	0.0458353	572.339	38.3209	8.34171	1.55852	3.66131e-17	8.36976e-14	Null_Model_OpenChrom
HumanMouseConsRegTFBS	Any	SAP-1a	58	19461	0.00298032	19.4675	4.62312	8.33474	2.97932	3.88341e-17	8.87747e-14	Null_Model_OpenChrom
DNaseClusters	HPAEC	none	2719	19461	0.139715	1861.52	103.02	8.32341	1.46063	4.27324e-17	9.76863e-14	Null_Model_OpenChrom
TxnFactorChIPV3	NT2-D1	YY1	222	19461	0.0114074	125.128	11.6746	8.2977	1.77419	5.3072e-17	1.21322e-13	Null_Model_OpenChrom
TxnFactorChIPV3	GM12878	ZNF143	561	19461	0.0288269	380.535	21.7503	8.29709	1.47424	5.3345e-17	1.21947e-13	Null_Model_OpenChrom
TxnFactorChIPV3	A549+DEX_100nM	none	3048	19461	0.156621	2144.63	109.301	8.26498	1.42122	6.98575e-17	1.59694e-13	Null_Model_OpenChrom
TxnFactorChIPV3	U87	POLR2A	1219	19461	0.0626381	886.782	40.2781	8.24811	1.37463	8.04618e-17	1.83936e-13	Null_Model_OpenChrom
DNaseClusters	HAc	none	3647	19461	0.1874	2643.62	121.665	8.24703	1.37955	8.11893e-17	1.85599e-13	Null_Model_OpenChrom
TxnFactorChIPV3	GM12878	ZBTB33	114	19461	0.00585787	53.0729	7.42736	8.20306	2.14799	1.17173e-16	2.67857e-13	Null_Model_OpenChrom
TxnFactorChIPV3	HeLa-S3	IRF3	88	19461	0.00452186	36.6194	6.26546	8.20061	2.4031	1.19581e-16	2.73361e-13	Null_Model_OpenChrom
Roadmapepigenomics	Duodenum_Mucosa	none	6203	19461	0.31874	4210.49	243.329	8.18852	1.47322	1.32231e-16	3.02281e-13	Null_Model_OpenChrom
TxnFactorChIPV3	K562	RCOR1	1030	19461	0.0529264	639.173	47.7287	8.18851	1.61146	1.32243e-16	3.02308e-13	Null_Model_OpenChrom
TxnFactorChIPV3	H1-hESC	USF2	230	19461	0.0118185	133.929	11.7461	8.17899	1.71733	1.43116e-16	3.27162e-13	Null_Model_OpenChrom
FANTOM5_enhancer_cell	respiratory_epithelial_cell	none	163	19461	0.00837573	84.5185	9.61259	8.16445	1.92857	1.61452e-16	3.69079e-13	Null_Model_OpenChrom
DNaseClusters	AG04449	none	3342	19461	0.171728	2443.36	111.126	8.08667	1.36779	3.06581e-16	7.00845e-13	Null_Model_OpenChrom
DNaseClusters	RWPE1	none	3345	19461	0.171882	2333.97	125.408	8.06194	1.43318	3.75456e-16	8.58294e-13	Null_Model_OpenChrom
TxnFactorChIPV3	GM15510+TNFa	RELA	484	19461	0.0248703	333.031	18.7354	8.05797	1.45332	3.87861e-16	8.86649e-13	Null_Model_OpenChrom
DNaseClusters	Ishikawa+Estradiol_100nM_1hr	none	2931	19461	0.150609	2080.08	105.771	8.04498	1.40908	4.31289e-16	9.85927e-13	Null_Model_OpenChrom
TxnFactorChIPV3	K562	TAF7	144	19461	0.00739941	72.4965	8.96985	7.97154	1.9863	7.8357e-16	1.79124e-12	Null_Model_OpenChrom
TxnFactorChIPV3	GM12878	NFYB	367	19461	0.0188582	235.766	16.5646	7.92252	1.55663	1.16368e-15	2.66018e-12	Null_Model_OpenChrom
TxnFactorChIPV3	GM15510+TNFa	none	484	19461	0.0248703	332.121	19.2724	7.88064	1.4573	1.62849e-15	3.72273e-12	Null_Model_OpenChrom
Roadmapepigenomics	Rectal_Mucosa.Donor_31	none	5504	19461	0.282822	3763.82	221.34	7.86204	1.46235	1.88959e-15	4.31961e-12	Null_Model_OpenChrom
TxnFactorChIPV3	MCF10A-Er-Src+4OHTAM_1uM_36hr	POLR2A	1116	19461	0.0573455	836.411	35.5875	7.8564	1.33427	1.97666e-15	4.51865e-12	Null_Model_OpenChrom
TxnFactorChIPV3	H1-hESC	SP4	286	19461	0.0146961	173.166	14.4088	7.8309	1.6516	2.4219e-15	5.53647e-12	Null_Model_OpenChrom
DNaseClusters	HPDE6-E6E7	none	3048	19461	0.156621	2139.71	116.044	7.82718	1.42449	2.49475e-15	5.703e-12	Null_Model_OpenChrom
TxnFactorChIPV3	GM12878	TBL1XR1	459	19461	0.0235856	313.56	18.5979	7.82023	1.46383	2.63637e-15	6.02675e-12	Null_Model_OpenChrom
TxnFactorChIPV3	H1-hESC	BACH1	347	19461	0.0178305	230.342	15.1085	7.72137	1.50646	5.75452e-15	1.31548e-11	Null_Model_OpenChrom
DNaseClusters	HMVEC-LBl	none	3387	19461	0.17404	2508.84	114.002	7.70306	1.35003	6.64227e-15	1.51842e-11	Null_Model_OpenChrom
Pazar_Chip	LS180_GSE31939_125	VDR	60	19461	0.00308309	22.017	4.94274	7.6846	2.72517	7.67364e-15	1.7542e-11	Null_Model_OpenChrom
TxnFactorChIPV3	GM12878	MYC	232	19461	0.0119213	140.446	11.9392	7.66837	1.65189	8.70985e-15	1.99107e-11	Null_Model_OpenChrom
DNaseI_Duke	AoSMC+serum_free_media	none	3753	19461	0.192847	2647.18	144.493	7.65308	1.41773	9.8113e-15	2.24286e-11	Null_Model_OpenChrom
TxnFactorChIPV3	H1-hESC	USF1	539	19461	0.0276964	377.242	21.2099	7.62655	1.42879	1.20562e-14	2.75605e-11	Null_Model_OpenChrom
TxnFactorChIPV3	U87	none	1337	19461	0.0687015	1006.91	43.4885	7.59024	1.32782	1.59655e-14	3.64972e-11	Null_Model_OpenChrom
Pazar_Chip	megakaryocytes_GSE24674	RUNX1	269	19461	0.0138225	169.513	13.1268	7.57886	1.58689	1.74303e-14	3.98457e-11	Null_Model_OpenChrom
TxnFactorChIPV3	GM12892	YY1	549	19461	0.0282103	393.884	20.586	7.53503	1.39381	2.44119e-14	5.58057e-11	Null_Model_OpenChrom
Pazar_Chip	PASMC_GSE28848	none	101	19461	0.00518987	48.0629	7.02816	7.53214	2.10141	2.49583e-14	5.70547e-11	Null_Model_OpenChrom
TxnFactorChIPV3	PFSK-1	TAF1	295	19461	0.0151585	186.485	14.4289	7.52069	1.5819	2.72443e-14	6.22804e-11	Null_Model_OpenChrom
TxnFactorChIPV3	GM12878	IRF4	444	19461	0.0228149	312.191	17.5514	7.50991	1.42221	2.95842e-14	6.76294e-11	Null_Model_OpenChrom
TxnFactorChIPV3	H1-hESC	ATF2	252	19461	0.012949	154.01	13.0994	7.4805	1.63626	3.7019e-14	8.46253e-11	Null_Model_OpenChrom
TxnFactorChIPV3	GM12878	ELF1	797	19461	0.0409537	544.597	33.7635	7.4756	1.46347	3.84274e-14	8.7845e-11	Null_Model_OpenChrom
H3K4Me1_Broad	A549	none	7939	19461	0.407944	6121.86	243.892	7.45061	1.29683	4.64563e-14	1.06199e-10	Null_Model_OpenChrom
Pazar_Chip	HeLa_GSE22478_G1	none	467	19461	0.0239967	291.468	23.5837	7.44296	1.60224	4.92288e-14	1.12537e-10	Null_Model_OpenChrom
Pazar_Chip	HeLa_GSE22478_G1	PHF8	467	19461	0.0239967	291.857	23.7371	7.37845	1.6001	8.00699e-14	1.8304e-10	Null_Model_OpenChrom
TxnFactorChIPV3	K562	SP2	128	19461	0.00657726	68.5455	8.08259	7.35588	1.86737	9.4835e-14	2.16793e-10	Null_Model_OpenChrom
TxnFactorChIPV3	K562	ZBTB33	126	19461	0.00647449	64.6983	8.3348	7.35491	1.9475	9.55282e-14	2.18378e-10	Null_Model_OpenChrom
H2A.Z_Broad	HepG2	none	8489	19461	0.436206	6229.33	307.521	7.34804	1.36275	1.0057e-13	2.29902e-10	Null_Model_OpenChrom
TxnFactorChIPV3	K562	RBBP5	600	19461	0.0308309	440.226	21.7684	7.33973	1.36294	1.07009e-13	2.44623e-10	Null_Model_OpenChrom
Pazar_Chip	PASMC_GSE28848	SMAD1	101	19461	0.00518987	48.1898	7.1968	7.33801	2.09588	1.08397e-13	2.47795e-10	Null_Model_OpenChrom
DNaseClusters	MCF-7+Hypoxia_LacAcid	none	3165	19461	0.162633	2306.6	117.712	7.29237	1.37215	1.52273e-13	3.48096e-10	Null_Model_OpenChrom
TxnFactorChIPV3	GM12878	YY1	924	19461	0.0474796	694.927	31.4515	7.28336	1.32964	1.62803e-13	3.72168e-10	Null_Model_OpenChrom
TxnFactorChIPV3	H1-hESC	EP300	303	19461	0.0155696	197.03	14.5762	7.27008	1.53784	1.79636e-13	4.10648e-10	Null_Model_OpenChrom
TxnFactorChIPV3	K562	BACH1	119	19461	0.00611479	61.9161	7.91005	7.21663	1.92196	2.66462e-13	6.09133e-10	Null_Model_OpenChrom
Roadmapepigenomics	Pancreatic_Islets	none	3563	19461	0.183084	2520.55	144.721	7.20316	1.41358	2.94157e-13	6.72443e-10	Null_Model_OpenChrom
TxnFactorChIPV3	GM18951+TNFa	RELA	458	19461	0.0235342	323.518	18.6872	7.19645	1.41568	3.09011e-13	7.06399e-10	Null_Model_OpenChrom
TxnFactorChIPV3	PFSK-1	SIN3AK20	251	19461	0.0128976	157.633	13.0398	7.16013	1.5923	4.03013e-13	9.21289e-10	Null_Model_OpenChrom
DNaseClusters	HA-h	none	3872	19461	0.198962	2928.33	132.288	7.13342	1.32225	4.89518e-13	1.11904e-09	Null_Model_OpenChrom
DNaseClusters	HRGEC	none	2794	19461	0.143569	2038.77	106.369	7.10016	1.37044	6.23059e-13	1.42431e-09	Null_Model_OpenChrom
Pazar_Chip	K562_GSE29195_BIO	GATA2	370	19461	0.0190124	256.795	15.993	7.07838	1.44084	7.2923e-13	1.66702e-09	Null_Model_OpenChrom
TxnFactorChIPV3	K562	PHF8	785	19461	0.0403371	562.373	31.5149	7.06419	1.39587	8.07776e-13	1.84658e-09	Null_Model_OpenChrom
DNaseClusters	HMVEC-dBl-Neo	none	3299	19461	0.169519	2495.56	113.826	7.05848	1.32195	8.41684e-13	1.92409e-09	Null_Model_OpenChrom
TxnFactorChIPV3	K562	SIRT6	84	19461	0.00431632	38.8472	6.40466	7.05	2.16232	8.94564e-13	2.04497e-09	Null_Model_OpenChrom
TxnFactorChIPV3	HUVEC	JUN	672	19461	0.0345306	509.734	23.0672	7.03448	1.31833	1.00002e-12	2.28604e-09	Null_Model_OpenChrom
HumanMouseConsRegTFBS	Any	NRF-1	28	19461	0.00143877	8.2028	2.81457	7.03382	3.41347	1.0048e-12	2.29697e-09	Null_Model_OpenChrom
Pazar_Chip	HUVEC_GSE27634	none	46	19461	0.0023637	17.041	4.13199	7.0085	2.69938	1.20442e-12	2.7533e-09	Null_Model_OpenChrom
TxnFactorChIPV3	K562	CCNT2	681	19461	0.0349931	471.722	30.0298	6.969	1.44365	1.59599e-12	3.64843e-09	Null_Model_OpenChrom
TxnFactorChIPV3	GM18951+TNFa	none	458	19461	0.0235342	323.721	19.3027	6.95646	1.4148	1.7446e-12	3.98815e-09	Null_Model_OpenChrom
DNaseClusters	Ishikawa+4OHTAM_100nM_30m	none	2945	19461	0.151328	2128.82	117.502	6.9461	1.38339	1.8776e-12	4.29219e-09	Null_Model_OpenChrom
FANTOM5_enhancer_cell	neutrophil	none	115	19461	0.00590925	61.2228	7.75315	6.93618	1.87839	2.01425e-12	4.60457e-09	Null_Model_OpenChrom
TxnFactorChIPV3	K562+IFNg30	MYC	1085	19461	0.0557525	756.318	47.4465	6.92742	1.43458	2.14288e-12	4.89862e-09	Null_Model_OpenChrom
TxnFactorChIPV3	K562+IFNa6h	none	1159	19461	0.059555	869.228	41.8589	6.9226	1.33337	2.21717e-12	5.06845e-09	Null_Model_OpenChrom
TxnFactorChIPV3	K562+IFNa6h	STAT2	77	19461	0.00395663	34.7712	6.10955	6.91193	2.21447	2.39056e-12	5.46483e-09	Null_Model_OpenChrom
TxnFactorChIPV3	SK-N-SH	POLR2A	1224	19461	0.062895	992.202	33.738	6.87053	1.23362	3.19819e-12	7.31107e-09	Null_Model_OpenChrom
TxnFactorChIPV3	K562	HDAC1	452	19461	0.0232259	317.951	19.5206	6.86704	1.4216	3.2773e-12	7.4919e-09	Null_Model_OpenChrom
Pazar_Chip	Caco-2_GSE23436_proliferating	CDX2	2901	19461	0.149067	2243.02	96.5649	6.81386	1.29335	4.75086e-12	1.08605e-08	Null_Model_OpenChrom
TxnFactorChIPV3	GM12878	MAZ	703	19461	0.0361235	518.578	27.0866	6.80858	1.35563	4.92831e-12	1.12661e-08	Null_Model_OpenChrom
TxnFactorChIPV3	HeLa-S3	RPC155	81	19461	0.00416217	38.3996	6.26851	6.79594	2.1094	5.38035e-12	1.22995e-08	Null_Model_OpenChrom
TxnFactorChIPV3	GM12878	TCF12	543	19461	0.027902	402.605	20.6831	6.7879	1.34872	5.6888e-12	1.30046e-08	Null_Model_OpenChrom
H3K4Me2_Broad	A549	none	6001	19461	0.30836	4446.84	229.131	6.78285	1.3495	5.89146e-12	1.34679e-08	Null_Model_OpenChrom
DNaseClusters	HTR8svn	none	2649	19461	0.136118	2036.59	91.485	6.69411	1.3007	1.08495e-11	2.48021e-08	Null_Model_OpenChrom
TxnFactorChIPV3	K562	TAL1	452	19461	0.0232259	325.415	18.9962	6.66373	1.389	1.33483e-11	3.05141e-08	Null_Model_OpenChrom
Pazar_Chip	HUVEC_GSE27634	SMAD1	46	19461	0.0023637	17.3826	4.29517	6.66269	2.64632	1.34426e-11	3.07299e-08	Null_Model_OpenChrom
DNaseClusters	HNPCEpiC	none	3930	19461	0.201942	3062.18	130.771	6.63618	1.2834	1.60962e-11	3.67959e-08	Null_Model_OpenChrom
H3K4Me1_SYDH	PANC-1	none	2657	19461	0.136529	2045.03	92.5996	6.60877	1.29925	1.93769e-11	4.42956e-08	Null_Model_OpenChrom
TxnFactorChIPV3	GM12878	TCF3	440	19461	0.0226093	317.694	18.5216	6.6034	1.38498	2.00915e-11	4.59292e-08	Null_Model_OpenChrom
BroadChromHMM	H1-hESC	ActivePromoter	642	19461	0.0329891	495.85	22.1637	6.5941	1.29475	2.13928e-11	4.89038e-08	Null_Model_OpenChrom
FANTOM5_enhancer_cell	mast_cell	none	165	19461	0.0084785	100.444	9.80301	6.58537	1.64271	2.26881e-11	5.18649e-08	Null_Model_OpenChrom
Roadmapepigenomics	Mesenchymal_Stem_Cell_Derived_Adipocyte	none	7218	19461	0.370896	5344.8	284.957	6.57361	1.35047	2.45553e-11	5.61334e-08	Null_Model_OpenChrom
TxnFactorChIPV3	GM12878	NFYA	89	19461	0.00457325	44.1768	6.82068	6.57166	2.01463	2.48793e-11	5.68741e-08	Null_Model_OpenChrom
TxnFactorChIPV3	HeLa-S3	E2F1	475	19461	0.0244078	338.483	20.8071	6.56111	1.40332	2.6704e-11	6.10453e-08	Null_Model_OpenChrom
Pazar_Chip	Jurkat_GSE17954	ETS1	754	19461	0.0387442	562.368	29.4209	6.51348	1.34076	3.67147e-11	8.39299e-08	Null_Model_OpenChrom
TxnFactorChIPV3	K562	HMGN3	556	19461	0.02857	391.122	25.3243	6.51067	1.42155	3.74072e-11	8.55129e-08	Null_Model_OpenChrom
DNaseClusters	T-47D	none	3019	19461	0.155131	2259.86	117.255	6.47427	1.33592	4.76369e-11	1.08898e-07	Null_Model_OpenChrom
DNaseClusters	HFF-Myc	none	3880	19461	0.199373	3036.72	130.82	6.44612	1.2777	5.73765e-11	1.31163e-07	Null_Model_OpenChrom
DNaseI_Duke	A549	none	3723	19461	0.191306	2987.28	114.724	6.41295	1.24628	7.13645e-11	1.63139e-07	Null_Model_OpenChrom
Pazar_Chip	megakaryocytes_GSE24674	none	354	19461	0.0181902	250.783	16.1289	6.39951	1.41158	7.79377e-11	1.78166e-07	Null_Model_OpenChrom
H3K4Me1_SYDH	HCT-116	none	1345	19461	0.0691126	1031.17	49.1269	6.38805	1.30434	8.40093e-11	1.92045e-07	Null_Model_OpenChrom
TxnFactorChIPV3	K562	MYC	1018	19461	0.0523097	679.733	53.0138	6.38073	1.49765	8.81222e-11	2.01447e-07	Null_Model_OpenChrom
Pazar_Chip	K562_GSE29195_BIO	none	456	19461	0.0234315	328.672	20.0434	6.35259	1.3874	1.05857e-10	2.4199e-07	Null_Model_OpenChrom
TxnFactorChIPV3	K562	BCL3	64	19461	0.00328863	29.6713	5.41783	6.33624	2.15696	1.17719e-10	2.69105e-07	Null_Model_OpenChrom
TxnFactorChIPV3	NB4	POLR2A	948	19461	0.0487128	761.73	29.4883	6.31673	1.24454	1.33579e-10	3.05362e-07	Null_Model_OpenChrom
H3K79Me2_Broad	A549	none	4716	19461	0.242331	4114.74	95.3865	6.30341	1.14612	1.45586e-10	3.32809e-07	Null_Model_OpenChrom
DNaseClusters	BE2_C	none	2922	19461	0.150146	2317.91	95.9467	6.29613	1.26062	1.52585e-10	3.48808e-07	Null_Model_OpenChrom
TxnFactorChIPV3	A549	RAD21	561	19461	0.0288269	413.889	23.3761	6.29321	1.35544	1.55479e-10	3.55426e-07	Null_Model_OpenChrom
TxnFactorChIPV3	K562	NFYA	148	19461	0.00760495	88.4975	9.55773	6.22559	1.67236	2.39877e-10	5.4836e-07	Null_Model_OpenChrom
DNaseClusters	WI-38+4OHTAM_20nM_72hr	none	3726	19461	0.19146	2856.77	139.718	6.22133	1.30427	2.46484e-10	5.63463e-07	Null_Model_OpenChrom
FANTOM5_enhancer_cell	kidney_epithelial_cell	none	163	19461	0.00837573	99.1678	10.2621	6.22021	1.64368	2.48242e-10	5.67481e-07	Null_Model_OpenChrom
TxnFactorChIPV3	GM12878	NFE2	40	19461	0.00205539	15.3786	3.96932	6.20292	2.60101	2.77124e-10	6.33505e-07	Null_Model_OpenChrom
Pazar_Chip	CD34_GSE26501	GATA1	747	19461	0.0383845	591.194	25.2857	6.16182	1.26355	3.59564e-10	8.21963e-07	Null_Model_OpenChrom
TxnFactorChIPV3	MCF-7+serum_starved_media	MYC	236	19461	0.0121268	156.833	12.8904	6.14152	1.50478	4.08676e-10	9.34232e-07	Null_Model_OpenChrom
H3K79Me2_Broad	HepG2	none	4897	19461	0.251631	3752.06	186.6	6.13581	1.30515	4.23629e-10	9.68415e-07	Null_Model_OpenChrom
FANTOM5_enhancer_cell	basophil	none	182	19461	0.00935204	114.696	10.9859	6.12638	1.5868	4.49508e-10	1.02757e-06	Null_Model_OpenChrom
FANTOM5_enhancer_cell	skeletal_muscle_cell	none	109	19461	0.00560095	62.2208	7.64854	6.1161	1.75183	4.79478e-10	1.09609e-06	Null_Model_OpenChrom
TxnFactorChIPV3	H1-hESC	SIN3A	741	19461	0.0380762	581.662	26.0999	6.10491	1.27393	5.14294e-10	1.17568e-06	Null_Model_OpenChrom
DNaseClusters	NH-A	none	3591	19461	0.184523	2793.56	130.839	6.09484	1.28546	5.47749e-10	1.25215e-06	Null_Model_OpenChrom
TxnFactorChIPV3	K562+IFNa6h	STAT1	64	19461	0.00328863	30.0509	5.607	6.05477	2.12972	7.03107e-10	1.6073e-06	Null_Model_OpenChrom
TxnFactorChIPV3	K562	SAP30	368	19461	0.0189096	265.35	16.9615	6.05197	1.38685	7.15422e-10	1.63545e-06	Null_Model_OpenChrom
TxnFactorChIPV3	GM10847+TNFa	none	320	19461	0.0164431	228.888	15.0922	6.03701	1.39806	7.85002e-10	1.79451e-06	Null_Model_OpenChrom
Pazar_Chip	CD34_GSE26501	none	747	19461	0.0383845	592.445	25.7771	5.99585	1.26088	1.01211e-09	2.31369e-06	Null_Model_OpenChrom
FANTOM5_enhancer_cell	stromal_cell	none	135	19461	0.00693695	82.3267	8.84806	5.95309	1.63981	1.31561e-09	3.00748e-06	Null_Model_OpenChrom
TxnFactorChIPV3	K562	NR2C2	38	19461	0.00195262	14.8611	3.90329	5.92804	2.557	1.5329e-09	3.50421e-06	Null_Model_OpenChrom
TxnFactorChIPV3	K562	REST	379	19461	0.0194748	276.071	17.4047	5.91386	1.37284	1.67088e-09	3.81964e-06	Null_Model_OpenChrom
TxnFactorChIPV3	K562	YY1	798	19461	0.0410051	565.966	39.3814	5.89198	1.40998	1.90803e-09	4.36175e-06	Null_Model_OpenChrom
DNaseClusters	NHLF	none	3727	19461	0.191511	2968.31	128.919	5.88499	1.25559	1.99044e-09	4.55014e-06	Null_Model_OpenChrom
HumanMouseConsRegTFBS	Any	HIF-2alpha	57	19461	0.00292893	27.005	5.09872	5.88285	2.11072	2.01635e-09	4.60937e-06	Null_Model_OpenChrom
TxnFactorChIPV3	GM12878	WRNIP1	398	19461	0.0204512	296.867	17.1946	5.88165	1.34067	2.03094e-09	4.64272e-06	Null_Model_OpenChrom
DNaseI_Duke	MCF7+Randomized_shRNA_control	none	3495	19461	0.17959	2642.48	144.991	5.87982	1.32262	2.05358e-09	4.69447e-06	Null_Model_OpenChrom
TxnFactorChIPV3	K562+IFNa6h	POLR2A	806	19461	0.0414162	636.776	28.7834	5.87922	1.26575	2.06099e-09	4.71143e-06	Null_Model_OpenChrom
FANTOM5_enhancer_cell	fibroblast_of_the_conjuctiva	none	34	19461	0.00174708	12.3217	3.69843	5.86149	2.75936	2.29372e-09	5.24345e-06	Null_Model_OpenChrom
HumanMouseConsRegTFBS	Any	Stra13	19	19461	0.000976312	5.46953	2.3107	5.85558	3.47379	2.37675e-09	5.43325e-06	Null_Model_OpenChrom
TxnFactorChIPV3	SK-N-SH_RA	EP300	960	19461	0.0493294	749.008	36.3031	5.81195	1.2817	3.08748e-09	7.05797e-06	Null_Model_OpenChrom
HumanMouseConsRegTFBS	Any	HIF1	57	19461	0.00292893	26.0739	5.33503	5.7968	2.18609	3.37968e-09	7.72596e-06	Null_Model_OpenChrom
TxnFactorChIPV3	GM12878	PAX5	775	19461	0.0398232	578.875	33.8364	5.79627	1.3388	3.39029e-09	7.75021e-06	Null_Model_OpenChrom
Roadmapepigenomics	Small_Intestine	none	3298	19461	0.169467	2470.06	143.095	5.78596	1.33519	3.60498e-09	8.24099e-06	Null_Model_OpenChrom
TxnFactorChIPV3	GM10847+TNFa	RELA	320	19461	0.0164431	228.138	15.8936	5.77984	1.40266	3.73865e-09	8.54655e-06	Null_Model_OpenChrom
Pazar_Chip	PC3_GSE29808	ETS1	91	19461	0.00467602	50.2028	7.09421	5.75077	1.81265	4.4418e-09	1.0154e-05	Null_Model_OpenChrom
DNaseClusters	HA-sp	none	3307	19461	0.16993	2640.54	116.167	5.73703	1.25239	4.81767e-09	1.10132e-05	Null_Model_OpenChrom
TxnFactorChIPV3	K562	HDAC2	309	19461	0.0158779	209.751	17.6238	5.63153	1.47317	8.93091e-09	2.04161e-05	Null_Model_OpenChrom
TxnFactorChIPV3	K562	NFYB	230	19461	0.0118185	157.071	12.9646	5.62523	1.46431	9.26316e-09	2.11756e-05	Null_Model_OpenChrom
TxnFactorChIPV3	GM12878	NR2C2	51	19461	0.00262063	23.7283	4.86314	5.60785	2.14933	1.02429e-08	2.34152e-05	Null_Model_OpenChrom
H3K27Ac_Broad	A549	none	4637	19461	0.238271	3665.79	173.767	5.58916	1.26494	1.14086e-08	2.60801e-05	Null_Model_OpenChrom
H3K27Ac_Broad	HeLa-S3	none	3522	19461	0.180977	2799.09	130.391	5.54415	1.25827	1.47693e-08	3.37627e-05	Null_Model_OpenChrom
HumanMouseConsRegTFBS	Any	HNF4alpha1	52	19461	0.00267201	24.1149	5.04874	5.52318	2.15634	1.66458e-08	3.80522e-05	Null_Model_OpenChrom
TxnFactorChIPV3	HeLa-S3	GTF3C2	76	19461	0.00390525	39.1568	6.70435	5.49541	1.94091	1.94906e-08	4.45554e-05	Null_Model_OpenChrom
HumanMouseConsRegTFBS	Any	SAP1A	122	19461	0.00626895	74.3726	8.67986	5.48711	1.64039	2.0428e-08	4.66983e-05	Null_Model_OpenChrom
FANTOM5_enhancer_cell	tendon_cell	none	51	19461	0.00262063	24.8551	4.7676	5.48386	2.05189	2.08069e-08	4.75646e-05	Null_Model_OpenChrom
H3K4Me1_Broad	HeLa-S3	none	5683	19461	0.29202	4488.51	218.927	5.45614	1.26612	2.433e-08	5.56184e-05	Null_Model_OpenChrom
TxnFactorChIPV3	K562	MAZ	1125	19461	0.0578079	805.169	58.72	5.44672	1.39722	2.56539e-08	5.86448e-05	Null_Model_OpenChrom
Roadmapepigenomics	Rectal_Mucosa.Donor_29	none	4625	19461	0.237655	3545.69	198.588	5.43492	1.3044	2.741e-08	6.26593e-05	Null_Model_OpenChrom
TxnFactorChIPV3	K562+IFNg6h	POLR2A	925	19461	0.047531	746.978	32.9174	5.40814	1.23832	3.1842e-08	7.27907e-05	Null_Model_OpenChrom
Roadmapepigenomics	Adipose_Nuclei	none	6577	19461	0.337958	5131.11	267.5	5.40521	1.28179	3.2367e-08	7.39909e-05	Null_Model_OpenChrom
HumanMouseConsRegTFBS	Any	XBP-1	57	19461	0.00292893	28.046	5.36748	5.39434	2.03238	3.43875e-08	7.86099e-05	Null_Model_OpenChrom
TxnFactorChIPV3	GM12878	ATF2	598	19461	0.0307281	480.076	21.9759	5.36606	1.24564	4.02369e-08	9.19815e-05	Null_Model_OpenChrom
FANTOM5_enhancer_cell	pericyte_cell	none	62	19461	0.00318586	31.4366	5.71351	5.34933	1.97223	4.41413e-08	0.000100907	Null_Model_OpenChrom
DNaseClusters	HSMM	none	5214	19461	0.26792	4337.56	164.006	5.34399	1.20206	4.54625e-08	0.000103927	Null_Model_OpenChrom
FANTOM5_enhancer_cell	chondrocyte	none	58	19461	0.00298032	29.1099	5.41479	5.33541	1.99245	4.76642e-08	0.00010896	Null_Model_OpenChrom
Pazar_Chip	hESC_GSE20650	POU5F1	328	19461	0.0168542	240.602	16.4491	5.31321	1.36324	5.38565e-08	0.000123116	Null_Model_OpenChrom
FANTOM5_enhancer_cell	vascular_associated_smooth_muscle_cell	none	192	19461	0.00986589	132.604	11.2137	5.29669	1.44792	5.8959e-08	0.00013478	Null_Model_OpenChrom
FANTOM5_enhancer_cell	cardiac_fibroblast	none	93	19461	0.00477879	53.9261	7.3792	5.29515	1.72458	5.94604e-08	0.000135926	Null_Model_OpenChrom
FANTOM5_enhancer_cell	fibroblast_of_gingiva	none	82	19461	0.00421356	45.958	6.80663	5.29512	1.78424	5.94679e-08	0.000135944	Null_Model_OpenChrom
TxnFactorChIPV3	H1-hESC	SP2	97	19461	0.00498433	56.7383	7.61324	5.28838	1.7096	6.17008e-08	0.000141048	Null_Model_OpenChrom
Roadmapepigenomics	Sigmoid_Colon	none	3970	19461	0.203998	3044.16	175.819	5.26583	1.30413	6.97775e-08	0.000159511	Null_Model_OpenChrom
TxnFactorChIPV3	HEK293	ELK4	67	19461	0.00344278	35.3926	6.00572	5.26288	1.89305	7.09084e-08	0.000162097	Null_Model_OpenChrom
TxnFactorChIPV3	GM12892+TNFa	none	278	19461	0.014285	204.978	13.9125	5.24866	1.35624	7.66041e-08	0.000175117	Null_Model_OpenChrom
H3K4Me3_UW	A549	none	1679	19461	0.0862751	1310.04	70.5905	5.22676	1.28164	8.62511e-08	0.00019717	Null_Model_OpenChrom
TxnFactorChIPV3	HeLa-S3	FAM48A	40	19461	0.00205539	17.6593	4.28145	5.21801	2.26509	9.04281e-08	0.000206719	Null_Model_OpenChrom
TxnFactorChIPV3	ECC-1+DMSO_0.02pct	POLR2A	1048	19461	0.0538513	886.379	31.0034	5.21302	1.18234	9.28931e-08	0.000212354	Null_Model_OpenChrom
HumanMouseConsRegTFBS	Any	Arnt	37	19461	0.00190124	15.6913	4.10848	5.18651	2.35799	1.07134e-07	0.000244908	Null_Model_OpenChrom
Pazar_Chip	hESC_GSE29422	SMAD2-3	364	19461	0.0187041	261.522	19.8153	5.17164	1.39185	1.16025e-07	0.000265233	Null_Model_OpenChrom
TxnFactorChIPV3	H1-hESC	JUN	75	19461	0.00385386	41.5614	6.48787	5.15401	1.80456	1.27486e-07	0.000291434	Null_Model_OpenChrom
DNaseI_Duke	MCF7	none	3356	19461	0.172447	2675.35	132.171	5.14979	1.25442	1.30388e-07	0.000298067	Null_Model_OpenChrom
TxnFactorChIPV3	NHEK	POLR2A	355	19461	0.0182416	270.788	16.4377	5.1231	1.31099	1.50279e-07	0.000343538	Null_Model_OpenChrom
FANTOM5_enhancer_cell	skin_fibroblast	none	142	19461	0.00729664	93.5155	9.51662	5.09472	1.51847	1.74627e-07	0.000399198	Null_Model_OpenChrom
TxnFactorChIPV3	H1-hESC	EGR1	273	19461	0.0140281	197.276	14.9078	5.07949	1.38385	1.89224e-07	0.000432565	Null_Model_OpenChrom
TxnFactorChIPV3	GM12892+TNFa	RELA	278	19461	0.014285	204.354	14.5572	5.05909	1.36039	2.10628e-07	0.000481495	Null_Model_OpenChrom
H3K27Ac_SYDH	HCT-116	none	1325	19461	0.0680849	1102.11	44.0767	5.0569	1.20224	2.13066e-07	0.000487069	Null_Model_OpenChrom
TxnFactorChIPV3	K562+IFNa30	POLR2A	815	19461	0.0418786	654.17	31.8214	5.05415	1.24585	2.16159e-07	0.00049414	Null_Model_OpenChrom
FANTOM5_enhancer_cell	blood_vessel_endothelial_cell	none	136	19461	0.00698834	88.1229	9.51619	5.03112	1.5433	2.43808e-07	0.000557345	Null_Model_OpenChrom
HumanMouseConsRegTFBS	Any	Net	160	19461	0.00822157	107.676	10.4093	5.02664	1.48593	2.49578e-07	0.000570535	Null_Model_OpenChrom
TxnFactorChIPV3	K562	SETDB1	112	19461	0.0057551	70.0849	8.38438	4.99919	1.59806	2.8786e-07	0.000658048	Null_Model_OpenChrom
Pazar_Chip	keratinocytes_GSE17611_REP1	TP63	415	19461	0.0213247	323.865	18.2511	4.99339	1.2814	2.96644e-07	0.000678128	Null_Model_OpenChrom
FANTOM5_enhancer_cell	macrophage	none	90	19461	0.00462463	52.9231	7.45514	4.97334	1.70058	3.29048e-07	0.000752204	Null_Model_OpenChrom
DNaseClusters	PanIslets	none	3396	19461	0.174503	2671.64	145.967	4.96249	1.27113	3.47982e-07	0.000795487	Null_Model_OpenChrom
Pazar_Chip	keratinocytes_GSE17611_REP1	none	415	19461	0.0213247	323.151	18.5191	4.95969	1.28423	3.53029e-07	0.000807024	Null_Model_OpenChrom
TxnFactorChIPV3	GM18526	POLR2A	942	19461	0.0484045	788.073	31.0467	4.95793	1.19532	3.56249e-07	0.000814386	Null_Model_OpenChrom
TxnFactorChIPV3	ECC-1+DMSO_0.02pct	none	1724	19461	0.0885874	1380.78	69.3495	4.94919	1.24857	3.72622e-07	0.000851813	Null_Model_OpenChrom
TxnFactorChIPV3	GM12878	CHD1	258	19461	0.0132573	190.896	13.623	4.92577	1.35152	4.20154e-07	0.000960471	Null_Model_OpenChrom
TxnFactorChIPV3	GM10847	POLR2A	679	19461	0.0348903	559.517	24.2684	4.92338	1.21355	4.2532e-07	0.000972282	Null_Model_OpenChrom
TxnFactorChIPV3	K562+IFNg30	POLR2A	897	19461	0.0460922	736.678	32.5776	4.92123	1.21763	4.30014e-07	0.000983012	Null_Model_OpenChrom
FANTOM5_enhancer_cell	preadipocyte	none	119	19461	0.00611479	75.8541	8.77352	4.91773	1.5688	4.37758e-07	0.00100072	Null_Model_OpenChrom
Roadmapepigenomics	Gastric	none	3856	19461	0.19814	3027.58	168.785	4.90811	1.27362	4.598e-07	0.0010511	Null_Model_OpenChrom
TxnFactorChIPV3	GM18526	none	942	19461	0.0484045	787.569	31.6183	4.88422	1.19609	5.192e-07	0.00118689	Null_Model_OpenChrom
FANTOM5_enhancer_cell	sensory_epithelial_cell	none	89	19461	0.00457325	52.8511	7.42043	4.87153	1.68397	5.5369e-07	0.00126574	Null_Model_OpenChrom
TxnFactorChIPV3	GM10847	none	679	19461	0.0348903	557.819	24.9364	4.85959	1.21724	5.88155e-07	0.00134452	Null_Model_OpenChrom
Roadmapepigenomics	HeLa-S3_Cervical_Carcinoma	none	4768	19461	0.245003	3741	212.773	4.82674	1.27453	6.93931e-07	0.00158633	Null_Model_OpenChrom
DNaseClusters	SK-N-MC	none	2137	19461	0.109809	1765.84	77.0243	4.8187	1.21019	7.2249e-07	0.00165161	Null_Model_OpenChrom
TxnFactorChIPV3	K562+IFNa30	none	1127	19461	0.0579107	872.004	52.9987	4.81136	1.29243	7.4952e-07	0.0017134	Null_Model_OpenChrom
TxnFactorChIPV3	K562	MAX	1505	19461	0.0773342	1137.87	76.3928	4.80582	1.32265	7.70603e-07	0.0017616	Null_Model_OpenChrom
Pazar_Chip	CD40_GSE29194	none	112	19461	0.0057551	72.4575	8.26041	4.78698	1.54573	8.46539e-07	0.00193519	Null_Model_OpenChrom
TxnFactorChIPV3	GM12891	PAX5	102	19461	0.00524125	62.3936	8.27919	4.78385	1.63478	8.5984e-07	0.00196559	Null_Model_OpenChrom
FANTOM5_enhancer_cell	reticulocyte	none	37	19461	0.00190124	17.2068	4.16103	4.7568	2.15031	9.83422e-07	0.0022481	Null_Model_OpenChrom
TxnFactorChIPV3	GM12878	FOXM1	582	19461	0.029906	481.599	21.1814	4.74003	1.20847	1.06842e-06	0.00244241	Null_Model_OpenChrom
TxnFactorChIPV3	H1-hESC	SIN3AK20	330	19461	0.016957	255.802	15.7016	4.72551	1.29006	1.14771e-06	0.00262367	Null_Model_OpenChrom
H3K36Me3_Broad	NH-A	none	5110	19461	0.262576	4744.35	77.502	4.71791	1.07707	1.1914e-06	0.00272355	Null_Model_OpenChrom
TxnFactorChIPV3	GM12878	STAT3	191	19461	0.0098145	134.609	11.9863	4.70461	1.41892	1.27178e-06	0.00290729	Null_Model_OpenChrom
TxnFactorChIPV3	A549+DEX_100nM	POLR2A	1315	19461	0.067571	1078.61	50.249	4.70445	1.21917	1.27279e-06	0.00290959	Null_Model_OpenChrom
TxnFactorChIPV3	H1-hESC	MAFK	185	19461	0.00950619	130.631	11.5999	4.687	1.4162	1.38617e-06	0.00316878	Null_Model_OpenChrom
Pazar_Chip	K562_GSE29195_BIO	TCF7L2	112	19461	0.0057551	72.3826	8.46336	4.68105	1.54733	1.42707e-06	0.00326228	Null_Model_OpenChrom
HumanMouseConsRegTFBS	Any	COUP	38	19461	0.00195262	18.1608	4.24206	4.67677	2.09241	1.45714e-06	0.00333101	Null_Model_OpenChrom
Pazar_Chip	CD40_GSE29194	TCF7L2	112	19461	0.0057551	72.4276	8.48216	4.66537	1.54637	1.54029e-06	0.0035211	Null_Model_OpenChrom
FANTOM5_enhancer_cell	fibroblast_of_choroid_plexus	none	51	19461	0.00262063	26.002	5.36619	4.65843	1.96139	1.59318e-06	0.003642	Null_Model_OpenChrom
CTCF_Broad	HepG2	none	2058	19461	0.10575	1677.04	81.9234	4.6502	1.22716	1.65806e-06	0.00379033	Null_Model_OpenChrom
H3K9Me3_Broad	HepG2	none	1706	19461	0.0876625	1486.44	47.3017	4.64173	1.14771	1.72753e-06	0.00394914	Null_Model_OpenChrom
DNaseI_Duke	Ishikawa+Estradiol_10nM_30m	none	3093	19461	0.158933	2501.57	127.605	4.63487	1.23642	1.78584e-06	0.00408242	Null_Model_OpenChrom
FANTOM5_enhancer_cell	epithelial_cell_of_esophagus	none	33	19461	0.0016957	15.1608	3.89963	4.57458	2.17666	2.38589e-06	0.00545415	Null_Model_OpenChrom
TxnFactorChIPV3	PANC-1	SIN3AK20	311	19461	0.0159807	236.932	16.2919	4.54631	1.31261	2.72974e-06	0.00624018	Null_Model_OpenChrom
FANTOM5_enhancer_cell	mesothelial_cell	none	52	19461	0.00267201	28.1239	5.25591	4.54272	1.84896	2.77671e-06	0.00634756	Null_Model_OpenChrom
TxnFactorChIPV3	Gliobla	POLR2A	974	19461	0.0500488	814.146	35.3227	4.52553	1.19635	3.01217e-06	0.00688583	Null_Model_OpenChrom
TxnFactorChIPV3	GM12878	BCL3	348	19461	0.0178819	271.98	16.8838	4.50253	1.27951	3.35742e-06	0.00767507	Null_Model_OpenChrom
TxnFactorChIPV3	A549+EtOH_0.02pct	POLR2A	1295	19461	0.0665433	1075.1	48.999	4.48783	1.20454	3.59762e-06	0.00822417	Null_Model_OpenChrom
TxnFactorChIPV3	GM12878	MEF2A	370	19461	0.0190124	292.495	17.2945	4.48151	1.26498	3.70588e-06	0.00847165	Null_Model_OpenChrom
TxnFactorChIPV3	K562+IFNa30	IRF1	47	19461	0.00241509	24.6414	5.0146	4.45871	1.90736	4.1228e-06	0.00942472	Null_Model_OpenChrom
HumanMouseConsRegTFBS	Any	Erm	166	19461	0.00852988	116.955	11.0536	4.43703	1.41935	4.56039e-06	0.0104251	Null_Model_OpenChrom
Pazar_Chip	CD34_GSE29194_prog	TCF7L2	208	19461	0.010688	153.392	12.387	4.40851	1.35601	5.20411e-06	0.0118966	Null_Model_OpenChrom
FANTOM5_enhancer_cell	granulocyte	none	131	19461	0.00673141	89.1199	9.50745	4.40498	1.46993	5.28971e-06	0.0120923	Null_Model_OpenChrom
TxnFactorChIPV3	H1-hESC	RXRA	45	19461	0.00231232	23.0899	4.98898	4.3917	1.9489	5.62343e-06	0.0128552	Null_Model_OpenChrom
DNaseClusters	FibroP	none	4345	19461	0.223267	3530.62	185.547	4.38908	1.23066	5.69155e-06	0.0130109	Null_Model_OpenChrom
TxnFactorChIPV3	GM12878	EP300	488	19461	0.0250758	400.667	19.9143	4.38543	1.21797	5.78781e-06	0.0132309	Null_Model_OpenChrom
FANTOM5_enhancer_cell	placental_epithelial_cell	none	70	19461	0.00359694	40.9471	6.64787	4.37026	1.70952	6.20485e-06	0.0141843	Null_Model_OpenChrom
BroadChromHMM	NHLF	StrongEnhancer	1740	19461	0.0894096	1522.07	50.2415	4.33761	1.14318	7.20195e-06	0.0164637	Null_Model_OpenChrom
TxnFactorChIPV3	IMR90	POLR2A	916	19461	0.0470685	765.738	34.6555	4.33587	1.19623	7.25923e-06	0.0165946	Null_Model_OpenChrom
TxnFactorChIPV3	HUVEC	GATA2	594	19461	0.0305226	500.188	21.8257	4.29824	1.18755	8.60809e-06	0.0196781	Null_Model_OpenChrom
TxnFactorChIPV3	GM12878	MEF2C	215	19461	0.0110477	161.47	12.4572	4.29716	1.33152	8.65009e-06	0.0197741	Null_Model_OpenChrom
FANTOM5_enhancer_cell	endothelial_cell_of_hepatic_sinusoid	none	48	19461	0.00246647	25.8442	5.17781	4.279	1.85729	9.38669e-06	0.021458	Null_Model_OpenChrom
TxnFactorChIPV3	K562	E2F6	817	19461	0.0419814	624.569	45.0212	4.27422	1.3081	9.59028e-06	0.0219234	Null_Model_OpenChrom
Pazar_Chip	MCF7_GSE25021_oestrogen	RAD21	792	19461	0.0406968	626.353	38.9195	4.25616	1.26446	1.03985e-05	0.023771	Null_Model_OpenChrom
TxnFactorChIPV3	GM12891+TNFa	none	719	19461	0.0369457	613.162	24.9049	4.24969	1.17261	1.07035e-05	0.0244682	Null_Model_OpenChrom
FANTOM5_enhancer_cell	acinar_cell	none	51	19461	0.00262063	28.4705	5.30767	4.2447	1.79133	1.09443e-05	0.0250188	Null_Model_OpenChrom
FANTOM5_enhancer_cell	enteric_smooth_muscle_cell	none	53	19461	0.0027234	29.6933	5.50989	4.22998	1.78491	1.16857e-05	0.0267136	Null_Model_OpenChrom
FANTOM5_enhancer_cell	fibroblast_of_lymphatic_vessel	none	51	19461	0.00262063	28.4446	5.34782	4.21769	1.79296	1.23409e-05	0.0282113	Null_Model_OpenChrom
FANTOM5_enhancer_cell	retinal_pigment_epithelial_cell	none	49	19461	0.00251786	26.5944	5.31482	4.21568	1.84249	1.24513e-05	0.0284636	Null_Model_OpenChrom
Pazar_Chip	megakaryocytes_GSE24674	GATA1	126	19461	0.00647449	85.9001	9.51241	4.21553	1.46682	1.24594e-05	0.0284822	Null_Model_OpenChrom
FANTOM5_enhancer_cell	gingival_epithelial_cell	none	79	19461	0.0040594	48.5664	7.21955	4.21544	1.62664	1.24645e-05	0.0284939	Null_Model_OpenChrom
TxnFactorChIPV3	GM15510	POLR2A	978	19461	0.0502544	837.258	33.4998	4.20128	1.1681	1.32702e-05	0.0303357	Null_Model_OpenChrom
TxnFactorChIPV3	HEK293	TCF7L2	219	19461	0.0112533	166.069	12.6552	4.18255	1.31873	1.44127e-05	0.0329474	Null_Model_OpenChrom
TxnFactorChIPV3	GM12891+TNFa	RELA	719	19461	0.0369457	613.28	25.3349	4.17292	1.17239	1.50363e-05	0.034373	Null_Model_OpenChrom
TxnFactorChIPV3	HeLa-S3	POLR2A	1458	19461	0.0749191	1161.84	71.0477	4.16841	1.2549	1.53366e-05	0.0350595	Null_Model_OpenChrom
H3K27Ac_SYDH	PANC-1	none	2672	19461	0.1373	2224.7	107.476	4.16186	1.20106	1.57835e-05	0.0360811	Null_Model_OpenChrom
TxnFactorChIPV3	GM15510	none	978	19461	0.0502544	837.025	33.944	4.15317	1.16842	1.63953e-05	0.0374797	Null_Model_OpenChrom
TxnFactorChIPV3	H1-hESC	ZNF143	639	19461	0.0328349	530.591	26.4347	4.10099	1.20432	2.05689e-05	0.0470206	Null_Model_OpenChrom
FANTOM5_enhancer_cell	amniotic_epithelial_cell	none	52	19461	0.00267201	29.011	5.60775	4.09951	1.79242	2.07017e-05	0.047324	Null_Model_OpenChrom
TxnFactorChIPV3	A549	POLR2A	1056	19461	0.0542624	885.677	41.6714	4.08728	1.19231	2.18234e-05	0.0498882	Null_Model_OpenChrom
FANTOM5_enhancer_cell	hair_follicle_cell	none	58	19461	0.00298032	33.7752	5.93906	4.07889	1.71724	2.26255e-05	0.051722	Null_Model_OpenChrom
TxnFactorChIPV3	K562	SMARCB1	63	19461	0.00323724	38.0919	6.11094	4.07599	1.65389	2.29099e-05	0.052372	Null_Model_OpenChrom
LSD1_Broad	K562	none	4536	19461	0.233082	4290.77	60.4425	4.05722	1.05715	2.483e-05	0.0567614	Null_Model_OpenChrom
TxnFactorChIPV3	Raji	none	930	19461	0.0477879	790.944	34.2855	4.05582	1.17581	2.49788e-05	0.0571016	Null_Model_OpenChrom
FANTOM5_enhancer_cell	melanocyte	none	55	19461	0.00282617	32.0599	5.66042	4.05271	1.71554	2.53138e-05	0.0578674	Null_Model_OpenChrom
FANTOM5_enhancer_cell	urothelial_cell	none	55	19461	0.00282617	32.1938	5.64344	4.04119	1.7084	2.65906e-05	0.0607862	Null_Model_OpenChrom
TxnFactorChIPV3	Raji	POLR2A	930	19461	0.0477879	790.948	34.4532	4.03597	1.1758	2.71887e-05	0.0621534	Null_Model_OpenChrom
Pazar_Chip	HeLa_GSE22478	PHF8	789	19461	0.0405426	613.086	43.8541	4.01135	1.28693	3.01865e-05	0.0690063	Null_Model_OpenChrom
FANTOM5_enhancer_cell	myoblast	none	63	19461	0.00323724	37.8042	6.29346	4.00349	1.66648	3.12073e-05	0.0713399	Null_Model_OpenChrom
TxnFactorChIPV3	GM12878	RCOR1	62	19461	0.00318586	36.8821	6.2787	4.00049	1.68103	3.16057e-05	0.0722507	Null_Model_OpenChrom
TxnFactorChIPV3	MCF-7	POLR2A	903	19461	0.0464005	754.084	37.5558	3.96519	1.19748	3.66681e-05	0.0838233	Null_Model_OpenChrom
TxnFactorChIPV3	HEK293	POLR2A	749	19461	0.0384872	628.44	30.5885	3.94136	1.19184	4.05097e-05	0.0926052	Null_Model_OpenChrom
Pazar_Chip	H1_GSE17917	none	636	19461	0.0326807	501.911	34.1714	3.92401	1.26716	4.35431e-05	0.0995396	Null_Model_OpenChrom
HumanMouseConsRegTFBS	Any	CLOCK:BMAL	17	19461	0.000873542	6.70629	2.64682	3.88909	2.53493	5.03112e-05	0.115011	Null_Model_OpenChrom
TxnFactorChIPV3	GM12878	ZEB1	148	19461	0.00760495	107.847	10.3385	3.8838	1.37231	5.14185e-05	0.117543	Null_Model_OpenChrom
HumanMouseConsRegTFBS	Any	GABPalpha	246	19461	0.0126407	190.592	14.2853	3.87864	1.29071	5.252e-05	0.120061	Null_Model_OpenChrom
TxnFactorChIPV3	H1-hESC	GABPA	203	19461	0.0104311	154.097	12.6538	3.86469	1.31735	5.56163e-05	0.127139	Null_Model_OpenChrom
HumanMouseConsRegTFBS	Any	E2F-4:DP-2	60	19461	0.00308309	37.048	5.97442	3.84172	1.61952	6.10877e-05	0.139646	Null_Model_OpenChrom
TxnFactorChIPV3	SK-N-MC	none	1124	19461	0.0577565	928.747	51.2347	3.81094	1.21023	6.92185e-05	0.158234	Null_Model_OpenChrom
DNaseI_Duke	RWPE1	none	3512	19461	0.180463	2912.79	157.462	3.80544	1.20572	7.07768e-05	0.161796	Null_Model_OpenChrom
DNaseI_Duke	Ishikawa+4OHTAM_100nM_30m	none	3065	19461	0.157494	2570	130.297	3.79904	1.19261	7.26279e-05	0.166027	Null_Model_OpenChrom
Pazar_Chip	LS180_GSE31939_Veh	VDR	6	19461	0.000308309	1.40859	1.20908	3.79742	4.25957	7.31036e-05	0.167115	Null_Model_OpenChrom
FANTOM5_enhancer_cell	dendritic_cell	none	174	19461	0.00894096	129.304	11.782	3.79361	1.34567	7.42373e-05	0.169706	Null_Model_OpenChrom
TxnFactorChIPV3	K562	EGR1	834	19461	0.0428549	657.528	46.7009	3.77876	1.26839	7.88047e-05	0.180147	Null_Model_OpenChrom
DNaseClusters	Stellate	none	3107	19461	0.159653	2612.76	130.997	3.77295	1.18917	8.06631e-05	0.184396	Null_Model_OpenChrom
HumanMouseConsRegTFBS	Any	Max	16	19461	0.000822157	6.11289	2.62455	3.76717	2.61742	8.25542e-05	0.188719	Null_Model_OpenChrom
H3K79Me2_Broad	NHEK	none	4446	19461	0.228457	4053.71	104.767	3.74441	1.09677	9.04089e-05	0.206675	Null_Model_OpenChrom
TxnFactorChIPV3	H1-hESC	RFX5	55	19461	0.00282617	33.7333	5.70068	3.73056	1.63044	9.55277e-05	0.218376	Null_Model_OpenChrom
TxnFactorChIPV3	NB4	none	2093	19461	0.107548	1778.15	84.4387	3.72873	1.17707	9.62237e-05	0.219967	Null_Model_OpenChrom
TxnFactorChIPV3	HepG2	IRF3	31	19461	0.00159293	15.9041	4.04905	3.72826	1.94918	9.64033e-05	0.220378	Null_Model_OpenChrom
Pazar_Chip	hESC_GSE19461	none	227	19461	0.0116644	177.985	13.2446	3.70076	1.27539	0.000107478	0.245694	Null_Model_OpenChrom
TxnFactorChIPV3	GM19099	POLR2A	1045	19461	0.0536971	911.298	36.1742	3.69606	1.14672	0.000109484	0.25028	Null_Model_OpenChrom
TxnFactorChIPV3	MCF-7+serum_starved_media	POLR2A	992	19461	0.0509737	835.699	42.3057	3.69455	1.18703	0.000110137	0.251774	Null_Model_OpenChrom
FANTOM5_enhancer_cell	mammary_epithelial_cell	none	61	19461	0.00313447	38.3716	6.14034	3.6852	1.58972	0.000114262	0.261202	Null_Model_OpenChrom
Pazar_Chip	K562_GSE29195_rhBMP4	none	206	19461	0.0105853	160.799	12.2818	3.68031	1.2811	0.000116477	0.266266	Null_Model_OpenChrom
FANTOM5_enhancer_cell	keratinocyte	none	69	19461	0.00354555	44.4396	6.67597	3.67893	1.55267	0.000117107	0.267706	Null_Model_OpenChrom
HumanMouseConsRegTFBS	Any	ATF	30	19461	0.00154154	15.6264	3.95098	3.63799	1.91983	0.000137388	0.31407	Null_Model_OpenChrom
TxnFactorChIPV3	H1-hESC	YY1	495	19461	0.0254355	401.296	25.8616	3.6233	1.2335	0.000145435	0.332465	Null_Model_OpenChrom
TxnFactorChIPV3	K562	SMARCA4	76	19461	0.00390525	50.7423	6.97635	3.62048	1.49777	0.000147029	0.336108	Null_Model_OpenChrom
DNaseI_Duke	HPDE6-E6E7	none	3327	19461	0.170957	2766.41	155.122	3.61385	1.20264	0.00015084	0.344821	Null_Model_OpenChrom
H3K36Me3_Broad	A549	none	6113	19461	0.314115	5492.23	172.163	3.60572	1.11303	0.000155646	0.355806	Null_Model_OpenChrom
HumanMouseConsRegTFBS	Any	XBP1	188	19461	0.00966035	144.535	12.0592	3.60426	1.30072	0.000156525	0.357816	Null_Model_OpenChrom
Pazar_Chip	endoderm_GSE29422	none	368	19461	0.0189096	305.083	17.461	3.60329	1.20623	0.000157105	0.359141	Null_Model_OpenChrom
HumanMouseConsRegTFBS	Any	STAT5B	16	19461	0.000822157	6.51249	2.63706	3.59776	2.45682	0.000160485	0.366869	Null_Model_OpenChrom
Pazar_Chip	hESC_GSE19461	SMAD2-3	227	19461	0.0116644	178.645	13.4494	3.59529	1.27067	0.000162013	0.370361	Null_Model_OpenChrom
HumanMouseConsRegTFBS	Any	E2F-1	337	19461	0.0173167	273.476	17.6763	3.59377	1.23229	0.000162967	0.372542	Null_Model_OpenChrom
BroadChromHMM	HUVEC	ActivePromoter	736	19461	0.0378192	636.059	27.85	3.58855	1.15713	0.000166264	0.380079	Null_Model_OpenChrom
TxnFactorChIPV3	HL-60	none	390	19461	0.0200401	325.409	18.091	3.57035	1.19849	0.00017825	0.407481	Null_Model_OpenChrom
Pazar_Chip	Jurkat_GSE17954	CREBBP	804	19461	0.0413134	680.919	34.485	3.56911	1.18076	0.000179096	0.409414	Null_Model_OpenChrom
Pazar_Chip	K562_GSE29195_rhBMP4	SMAD1	206	19461	0.0105853	160.775	12.6907	3.56361	1.28129	0.000182895	0.418098	Null_Model_OpenChrom
TxnFactorChIPV3	HCT-116	POLR2A	1444	19461	0.0741997	1178.26	74.791	3.55311	1.22554	0.000190356	0.435154	Null_Model_OpenChrom
DNaseClusters	Gliobla	none	3010	19461	0.154668	2580	121.076	3.55149	1.16667	0.000191527	0.43783	Null_Model_OpenChrom
Pazar_Chip	MCF7_GSE25021_oestrogen	STAG1	1207	19461	0.0620215	1015.11	54.0817	3.54822	1.18904	0.000193919	0.443298	Null_Model_OpenChrom
TxnFactorChIPV3	HL-60	CTCF	390	19461	0.0200401	325.765	18.1181	3.54534	1.19718	0.000196057	0.448186	Null_Model_OpenChrom
TxnFactorChIPV3	GM12878	SMC3	596	19461	0.0306254	510.896	24.0375	3.54047	1.16658	0.000199707	0.456531	Null_Model_OpenChrom
TxnFactorChIPV3	GM19193	none	1029	19461	0.052875	902.099	36.037	3.52141	1.14067	0.00021463	0.490645	Null_Model_OpenChrom
BroadChromHMM	HUVEC	StrongEnhancer	1898	19461	0.0975284	1709.48	53.5694	3.51922	1.11028	0.00021641	0.494713	Null_Model_OpenChrom
BroadChromHMM	HMEC	ActivePromoter	823	19461	0.0422897	721.302	28.9454	3.51345	1.14099	0.000221166	0.505586	Null_Model_OpenChrom
H3K4Me2_Broad	HeLa-S3	none	4865	19461	0.249987	4160.97	200.388	3.51333	1.1692	0.000221267	0.505817	Null_Model_OpenChrom
FANTOM5_enhancer_cell	astrocyte	none	87	19461	0.00447048	59.5654	7.81319	3.51131	1.46058	0.000222949	0.509662	Null_Model_OpenChrom
Roadmapepigenomics	Colonic_Mucosa	none	3433	19461	0.176404	2936.03	142.679	3.48312	1.16926	0.0002478	0.56647	Null_Model_OpenChrom
BroadChromHMM	NHEK	ActivePromoter	929	19461	0.0477365	806.653	35.2108	3.47469	1.15167	0.000255721	0.584579	Null_Model_OpenChrom
TxnFactorChIPV3	K562	SPI1	454	19461	0.0233287	385.102	20.0402	3.43799	1.17891	0.000293029	0.669864	Null_Model_OpenChrom
TxnFactorChIPV3	GM19193+TNFa	none	162	19461	0.00832434	124.09	11.0893	3.41863	1.30551	0.000314688	0.719378	Null_Model_OpenChrom
FANTOM5_enhancer_cell	smooth_muscle_cell_of_prostate	none	51	19461	0.00262063	32.3506	5.4785	3.4041	1.57648	0.000331912	0.758751	Null_Model_OpenChrom
FANTOM5_enhancer_cell	neuron	none	36	19461	0.00184985	20.4486	4.57161	3.40175	1.76052	0.000334784	0.765317	Null_Model_OpenChrom
TxnFactorChIPV3	GM19193	POLR2A	1029	19461	0.052875	903.464	37.0634	3.38708	1.13895	0.000353208	0.807433	Null_Model_OpenChrom
TxnFactorChIPV3	GM19193+TNFa	RELA	162	19461	0.00832434	123.635	11.3526	3.37936	1.3103	0.000363267	0.830429	Null_Model_OpenChrom
TxnFactorChIPV3	GM18505	POLR2A	1014	19461	0.0521042	898.959	34.2575	3.35812	1.12797	0.000392372	0.896963	Null_Model_OpenChrom
HumanMouseConsRegTFBS	Any	ERF	227	19461	0.0116644	181.981	13.4412	3.34934	1.24738	0.000405023	0.925883	Null_Model_OpenChrom
TxnFactorChIPV3	GM12878	CEBPB	175	19461	0.00899234	135.535	11.8131	3.34075	1.29117	0.000417766	0.955013	Null_Model_OpenChrom
Pazar_Chip	hESC_GSE29422	SMAD4	99	19461	0.0050871	70.4745	8.54562	3.33802	1.40476	0.000421883	0.964425	Null_Model_OpenChrom
TxnFactorChIPV3	K562	GATA2	509	19461	0.0261549	402.257	32.043	3.33125	1.26536	0.000432277	0.988185	Null_Model_OpenChrom
BroadChromHMM	GM12878	ActivePromoter	971	19461	0.0498947	862.221	36.6315	2.96955	1.12616	0.00149117	1	Null_Model_OpenChrom
BroadChromHMM	GM12878	none	3729	19461	0.191614	4402.33	103.863	-6.48284	0.847052	1	1	Null_Model_OpenChrom
BroadChromHMM	GM12878	PoisedPromoter	86	19461	0.00441909	223.134	19.0449	-7.20056	0.385419	1	1	Null_Model_OpenChrom
BroadChromHMM	GM12878	StrongEnhancer	1057	19461	0.0543138	1163.09	35.1816	-3.01538	0.908789	0.998717	1	Null_Model_OpenChrom
BroadChromHMM	GM12878	WeakEnhancer	1779	19461	0.0914136	2029.77	58.6931	-4.2726	0.876453	0.99999	1	Null_Model_OpenChrom
BroadChromHMM	GM12878	WeakPromoter	594	19461	0.0305226	710.943	44.238	-2.6435	0.83551	0.995897	1	Null_Model_OpenChrom
BroadChromHMM	H1-hESC	none	3559	19461	0.182879	4740.45	111.128	-10.6314	0.750773	1	1	Null_Model_OpenChrom
BroadChromHMM	H1-hESC	PoisedPromoter	250	19461	0.0128462	740.01	40.3525	-12.1432	0.337833	1	1	Null_Model_OpenChrom
BroadChromHMM	H1-hESC	StrongEnhancer	371	19461	0.0190638	312.51	17.9842	3.25227	1.18716	0.000572439	1	Null_Model_OpenChrom
BroadChromHMM	H1-hESC	WeakEnhancer	2358	19461	0.121165	2890.09	73.9793	-7.1924	0.815892	1	1	Null_Model_OpenChrom
BroadChromHMM	H1-hESC	WeakPromoter	710	19461	0.0364832	909.016	56.7625	-3.50611	0.781064	0.999773	1	Null_Model_OpenChrom
BroadChromHMM	HepG2	PoisedPromoter	151	19461	0.00775911	258.008	17.6013	-6.07955	0.585253	1	1	Null_Model_OpenChrom
BroadChromHMM	HMEC	none	5160	19461	0.265146	5384.04	116.218	-1.92776	0.958388	0.973058	1	Null_Model_OpenChrom
BroadChromHMM	HMEC	PoisedPromoter	42	19461	0.00215816	196.176	15.0046	-10.2752	0.214094	1	1	Null_Model_OpenChrom
BroadChromHMM	HMEC	StrongEnhancer	2009	19461	0.103232	1734.48	103.078	2.66324	1.15827	0.00386957	1	Null_Model_OpenChrom
BroadChromHMM	HMEC	WeakEnhancer	2779	19461	0.142798	2870.91	66.2853	-1.38658	0.967986	0.917216	1	Null_Model_OpenChrom
BroadChromHMM	HMEC	WeakPromoter	531	19461	0.0272853	653.816	39.8273	-3.08372	0.812155	0.998978	1	Null_Model_OpenChrom
BroadChromHMM	HSMM	ActivePromoter	882	19461	0.0453214	783.451	48.7247	2.02258	1.12579	0.0215585	1	Null_Model_OpenChrom
BroadChromHMM	HSMM	none	4671	19461	0.240018	5150.05	117.195	-4.08762	0.906981	0.999978	1	Null_Model_OpenChrom
BroadChromHMM	HSMM	PoisedPromoter	77	19461	0.00395663	201.937	14.6278	-8.54106	0.381307	1	1	Null_Model_OpenChrom
BroadChromHMM	HSMM	StrongEnhancer	1821	19461	0.0935718	1784.56	71.8402	0.507286	1.02042	0.305977	1	Null_Model_OpenChrom
BroadChromHMM	HSMM	WeakEnhancer	2188	19461	0.11243	2434.33	69.5092	-3.54383	0.89881	0.999803	1	Null_Model_OpenChrom
BroadChromHMM	HSMM	WeakPromoter	678	19461	0.0348389	809.543	50.3599	-2.61207	0.837509	0.9955	1	Null_Model_OpenChrom
BroadChromHMM	HUVEC	none	4037	19461	0.207441	4396.77	98.2149	-3.6631	0.918174	0.999875	1	Null_Model_OpenChrom
BroadChromHMM	HUVEC	PoisedPromoter	104	19461	0.00534402	256.818	16.1349	-9.47128	0.404956	1	1	Null_Model_OpenChrom
BroadChromHMM	HUVEC	WeakEnhancer	1687	19461	0.0866862	1852.62	49.2872	-3.36037	0.910601	0.999611	1	Null_Model_OpenChrom
BroadChromHMM	HUVEC	WeakPromoter	412	19461	0.0211705	549.302	36.421	-3.76985	0.750043	0.999918	1	Null_Model_OpenChrom
BroadChromHMM	K562	ActivePromoter	873	19461	0.0448589	803.186	32.5989	2.14161	1.08692	0.0161124	1	Null_Model_OpenChrom
BroadChromHMM	K562	none	3957	19461	0.20333	4072.35	92.8536	-1.2423	0.971674	0.892936	1	Null_Model_OpenChrom
BroadChromHMM	K562	PoisedPromoter	100	19461	0.00513848	122.447	14.0214	-1.60088	0.816683	0.945298	1	Null_Model_OpenChrom
BroadChromHMM	K562	StrongEnhancer	1268	19461	0.065156	1238.76	48.1505	0.607299	1.02361	0.271826	1	Null_Model_OpenChrom
BroadChromHMM	K562	WeakEnhancer	2059	19461	0.105801	2140.86	58.8804	-1.39033	0.961762	0.917786	1	Null_Model_OpenChrom
BroadChromHMM	K562	WeakPromoter	442	19461	0.0227121	566.106	28.4591	-4.36086	0.780773	0.999994	1	Null_Model_OpenChrom
BroadChromHMM	NHEK	none	4573	19461	0.234983	5001.98	121.415	-3.53322	0.914237	0.999795	1	Null_Model_OpenChrom
BroadChromHMM	NHEK	PoisedPromoter	115	19461	0.00590925	350.289	22.223	-10.5876	0.328301	1	1	Null_Model_OpenChrom
BroadChromHMM	NHEK	StrongEnhancer	1884	19461	0.096809	1745.48	105.838	1.30882	1.07936	0.0952977	1	Null_Model_OpenChrom
BroadChromHMM	NHEK	WeakEnhancer	2091	19461	0.107446	2306.86	68.2027	-3.16497	0.906427	0.999224	1	Null_Model_OpenChrom
BroadChromHMM	NHEK	WeakPromoter	446	19461	0.0229176	565.498	36.0265	-3.31694	0.788686	0.999545	1	Null_Model_OpenChrom
BroadChromHMM	NHLF	ActivePromoter	946	19461	0.04861	839.093	35.7862	2.98739	1.12741	0.00140687	1	Null_Model_OpenChrom
BroadChromHMM	NHLF	none	4906	19461	0.252094	4839.25	96.9109	0.688739	1.01379	0.245494	1	Null_Model_OpenChrom
BroadChromHMM	NHLF	PoisedPromoter	85	19461	0.00436771	200.879	15.3456	-7.55131	0.42314	1	1	Null_Model_OpenChrom
BroadChromHMM	NHLF	WeakEnhancer	2556	19461	0.13134	2415.91	61.6857	2.27104	1.05799	0.0115722	1	Null_Model_OpenChrom
BroadChromHMM	NHLF	WeakPromoter	581	19461	0.0298546	691.783	44.0457	-2.51519	0.839858	0.994052	1	Null_Model_OpenChrom
CBP_Broad	K562	none	7184	19461	0.369149	8472.66	522.166	-2.46792	0.847903	0.993205	1	Null_Model_OpenChrom
CBX2_Broad	K562	none	3357	19461	0.172499	3997.51	129.22	-4.95677	0.839772	1	1	Null_Model_OpenChrom
CBX3_Broad	K562	none	6677	19461	0.343096	8059.56	464.886	-2.97397	0.828457	0.99853	1	Null_Model_OpenChrom
CBX8_Broad	K562	none	2925	19461	0.150301	3448.76	162.124	-3.23064	0.84813	0.999382	1	Null_Model_OpenChrom
CHD1_Broad	H1-hESC	none	5656	19461	0.290633	6760.01	298.645	-3.69673	0.836685	0.999891	1	Null_Model_OpenChrom
CHD1_Broad	K562	none	4747	19461	0.243924	5548.71	531.356	-1.50879	0.855515	0.934324	1	Null_Model_OpenChrom
CHD4_Mi2_Broad	K562	none	4682	19461	0.240584	4655.31	231.877	0.115123	1.00573	0.454174	1	Null_Model_OpenChrom
CHD7_Broad	H1-hESC	none	6727	19461	0.345666	7890.72	78.4903	-14.8263	0.85252	1	1	Null_Model_OpenChrom
CHD7_Broad	K562	none	6815	19461	0.350188	7596.34	71.8282	-10.8779	0.897142	1	1	Null_Model_OpenChrom
CpGIsland	Any	none	821	19461	0.0421869	1159.1	46.1716	-7.32265	0.708309	1	1	Null_Model_OpenChrom
CTCF_Broad	A549	none	2532	19461	0.130106	2636.69	107.448	-0.974349	0.960294	0.835058	1	Null_Model_OpenChrom
CTCF_Broad	CD20+	none	2087	19461	0.10724	2242.32	73.0559	-2.12609	0.930731	0.983252	1	Null_Model_OpenChrom
CTCF_Broad	Dnd41	none	3117	19461	0.160166	3466.99	102.612	-3.41083	0.89905	0.999676	1	Null_Model_OpenChrom
CTCF_Broad	GM12878	none	2640	19461	0.135656	2843.28	111.433	-1.8242	0.928506	0.965939	1	Null_Model_OpenChrom
CTCF_Broad	H1-hESC	none	2032	19461	0.104414	2603.89	120.907	-4.72997	0.780371	0.999999	1	Null_Model_OpenChrom
CTCF_Broad	HeLa-S3	none	3759	19461	0.193156	4229.62	133.827	-3.51666	0.888732	0.999781	1	Null_Model_OpenChrom
CTCF_Broad	HMEC	none	2088	19461	0.107292	2005.66	83.1662	0.990038	1.04105	0.161078	1	Null_Model_OpenChrom
CTCF_Broad	HSMM	none	1814	19461	0.0932121	1847.05	91.9598	-0.359396	0.982107	0.64035	1	Null_Model_OpenChrom
CTCF_Broad	HSMMtube	none	2939	19461	0.15102	3111.66	135.848	-1.27094	0.944513	0.898125	1	Null_Model_OpenChrom
CTCF_Broad	HUVEC	none	1666	19461	0.0856071	1874.66	97.9002	-2.13138	0.888693	0.983471	1	Null_Model_OpenChrom
CTCF_Broad	K562	none	2505	19461	0.128719	2945.89	109.529	-4.02534	0.850337	0.999972	1	Null_Model_OpenChrom
CTCF_Broad	Monocytes-CD14+_RO01746	none	1760	19461	0.0904373	1749.49	91.5177	0.114792	1.006	0.454305	1	Null_Model_OpenChrom
CTCF_Broad	NH-A	none	2586	19461	0.132881	2622.47	129.98	-0.2806	0.986092	0.610491	1	Null_Model_OpenChrom
CTCF_Broad	NHDF-Ad	none	2239	19461	0.115051	2389.31	77.6778	-1.93508	0.93709	0.97351	1	Null_Model_OpenChrom
CTCF_Broad	NHEK	none	1984	19461	0.101947	2099.22	107.987	-1.067	0.945112	0.857015	1	Null_Model_OpenChrom
CTCF_Broad	NHLF	none	2753	19461	0.141462	3018.58	124.68	-2.13006	0.912019	0.983417	1	Null_Model_OpenChrom
CTCF_Broad	Osteoblasts	none	2069	19461	0.106315	2176.69	73.5166	-1.4648	0.950527	0.928512	1	Null_Model_OpenChrom
DNaseClusters	8988T	none	2492	19461	0.128051	2991.15	143.214	-3.48537	0.833123	0.999754	1	Null_Model_OpenChrom
DNaseClusters	Adult_CD4_Th0	none	2356	19461	0.121063	3015.29	149.357	-4.41419	0.781351	0.999995	1	Null_Model_OpenChrom
DNaseClusters	Any	none	13594	19461	0.698525	19361.7	441.725	-13.0572	0.702109	1	1	Null_Model_OpenChrom
DNaseClusters	CD20+	none	1666	19461	0.0856071	1634.95	88.5388	0.350648	1.01899	0.362926	1	Null_Model_OpenChrom
DNaseClusters	CD34+_Mobilized	none	2686	19461	0.13802	2449.48	94.3589	2.5066	1.09656	0.00609484	1	Null_Model_OpenChrom
DNaseClusters	Chorion	none	2601	19461	0.133652	2743.08	146.218	-0.971729	0.948203	0.834407	1	Null_Model_OpenChrom
DNaseClusters	CLL	none	1594	19461	0.0819074	1551.59	80.8191	0.524723	1.02733	0.299888	1	Null_Model_OpenChrom
DNaseClusters	CMK	none	2020	19461	0.103797	1913.71	70.035	1.51764	1.05554	0.064553	1	Null_Model_OpenChrom
DNaseClusters	Fibrobl	none	4175	19461	0.214532	5061.21	254.363	-3.48402	0.824902	0.999753	1	Null_Model_OpenChrom
DNaseClusters	GM06990	none	1579	19461	0.0811366	1442.75	73.1994	1.86132	1.09444	0.0313493	1	Null_Model_OpenChrom
DNaseClusters	GM12864	none	2215	19461	0.113817	1995.35	90.5715	2.4251	1.11008	0.00765201	1	Null_Model_OpenChrom
DNaseClusters	GM12865	none	2280	19461	0.117157	2064.04	92.6597	2.33067	1.10463	0.00988544	1	Null_Model_OpenChrom
DNaseClusters	GM12878	none	2534	19461	0.130209	2627.43	120.345	-0.776347	0.964441	0.781228	1	Null_Model_OpenChrom
DNaseClusters	GM12891	none	1925	19461	0.0989158	2321.19	125.003	-3.16944	0.829316	0.999236	1	Null_Model_OpenChrom
DNaseClusters	GM12892	none	2010	19461	0.103283	2584.84	124.696	-4.60993	0.77761	0.999998	1	Null_Model_OpenChrom
DNaseClusters	GM18507	none	2004	19461	0.102975	1856.68	84.7341	1.73858	1.07934	0.0410546	1	Null_Model_OpenChrom
DNaseClusters	GM19238	none	2188	19461	0.11243	2328.15	129.199	-1.08474	0.939803	0.860981	1	Null_Model_OpenChrom
DNaseClusters	GM19239	none	2013	19461	0.103438	2054.21	112.33	-0.366871	0.979938	0.643142	1	Null_Model_OpenChrom
DNaseClusters	GM19240	none	2300	19461	0.118185	2659.35	147.414	-2.43768	0.864873	0.992609	1	Null_Model_OpenChrom
DNaseClusters	H1-hESC	none	2828	19461	0.145316	3814.12	159.001	-6.20196	0.741456	1	1	Null_Model_OpenChrom
DNaseClusters	H7-hESC	none	3279	19461	0.168491	3322.78	164.953	-0.265429	0.986823	0.60466	1	Null_Model_OpenChrom
DNaseClusters	H9ES	none	2073	19461	0.106521	2424.94	134.361	-2.61938	0.854865	0.995596	1	Null_Model_OpenChrom
DNaseClusters	HEK293T	none	2413	19461	0.123992	2626.76	174.269	-1.22658	0.918624	0.89001	1	Null_Model_OpenChrom
DNaseClusters	HMEC	none	4988	19461	0.256307	4712.86	204.372	1.3463	1.05838	0.0891034	1	Null_Model_OpenChrom
DNaseClusters	HSMM_emb	none	2435	19461	0.125122	2106.36	107.625	3.05357	1.15602	0.00113067	1	Null_Model_OpenChrom
DNaseClusters	HSMMtube	none	4556	19461	0.234109	4504.91	192.716	0.265115	1.01134	0.395461	1	Null_Model_OpenChrom
DNaseClusters	HUVEC	none	3213	19461	0.165099	2914.91	129.264	2.30605	1.10226	0.0105538	1	Null_Model_OpenChrom
DNaseClusters	iPS	none	2319	19461	0.119161	3162.26	151.206	-5.57692	0.733336	1	1	Null_Model_OpenChrom
DNaseClusters	Jurkat	none	2039	19461	0.104774	2087.77	79.1917	-0.615875	0.976639	0.731012	1	Null_Model_OpenChrom
DNaseClusters	K562	none	2937	19461	0.150917	2814.82	90.7887	1.3458	1.04341	0.0891827	1	Null_Model_OpenChrom
DNaseClusters	Medullo	none	2139	19461	0.109912	2996.11	173.275	-4.94652	0.713926	1	1	Null_Model_OpenChrom
DNaseClusters	Melano	none	3840	19461	0.197318	3654.74	167.973	1.10292	1.05069	0.135031	1	Null_Model_OpenChrom
DNaseClusters	Myometr	none	2894	19461	0.148708	2585.29	140.808	2.19241	1.11941	0.0141749	1	Null_Model_OpenChrom
DNaseClusters	NHEK	none	3351	19461	0.172191	3124.2	143.631	1.57906	1.0726	0.0571607	1	Null_Model_OpenChrom
DNaseClusters	NT2-D1	none	2302	19461	0.118288	2559.56	132.857	-1.93861	0.899374	0.973725	1	Null_Model_OpenChrom
DNaseClusters	Osteobl	none	3995	19461	0.205282	4858.19	200.456	-4.30615	0.822322	0.999992	1	Null_Model_OpenChrom
DNaseClusters	PanIsletD	none	3537	19461	0.181748	3089.21	155.658	2.87677	1.14495	0.00200885	1	Null_Model_OpenChrom
DNaseClusters	pHTE	none	4417	19461	0.226967	3877.65	207.699	2.59681	1.13909	0.00470471	1	Null_Model_OpenChrom
DNaseClusters	ProgFib	none	3194	19461	0.164123	3218.13	172.128	-0.140203	0.992501	0.55575	1	Null_Model_OpenChrom
DNaseClusters	SK-N-SH_RA	none	1620	19461	0.0832434	1422.49	70.4007	2.80548	1.13885	0.0025121	1	Null_Model_OpenChrom
DNaseClusters	Th1	none	2996	19461	0.153949	4245.61	176.045	-7.09823	0.705671	1	1	Null_Model_OpenChrom
DNaseClusters	Th2	none	1530	19461	0.0786188	1433.93	68.9227	1.39388	1.067	0.081677	1	Null_Model_OpenChrom
DNaseClusters	Urothelia	none	2605	19461	0.133857	2291.25	105.111	2.98497	1.13694	0.00141802	1	Null_Model_OpenChrom
DNaseClusters	Urothelia+UT189	none	2771	19461	0.142387	2672.02	109.56	0.903405	1.03704	0.183156	1	Null_Model_OpenChrom
DNaseClusters	WERI-Rb-1	none	2220	19461	0.114074	2313.43	104.831	-0.891243	0.959614	0.813601	1	Null_Model_OpenChrom
DNaseI_Duke	8988T	none	2771	19461	0.142387	4021.31	171.953	-7.27122	0.689079	1	1	Null_Model_OpenChrom
DNaseI_Duke	Adult_CD4_Th0	none	2307	19461	0.118545	3226.65	171.947	-5.34848	0.714982	1	1	Null_Model_OpenChrom
DNaseI_Duke	Adult_CD4_Th1	none	2338	19461	0.120138	3446.96	185.218	-5.98732	0.678279	1	1	Null_Model_OpenChrom
DNaseI_Duke	CD20+_RO01794	none	2279	19461	0.117106	3712.81	191.151	-7.50093	0.61382	1	1	Null_Model_OpenChrom
DNaseI_Duke	Cerebellum_OC	none	2847	19461	0.146293	2949.46	151.117	-0.67801	0.965262	0.751117	1	Null_Model_OpenChrom
DNaseI_Duke	Cerebrum_frontal_OC	none	3235	19461	0.16623	4045.97	203.8	-3.97921	0.799562	0.999965	1	Null_Model_OpenChrom
DNaseI_Duke	Chorion	none	3046	19461	0.156518	4443.31	218.397	-6.39802	0.685525	1	1	Null_Model_OpenChrom
DNaseI_Duke	CLL	none	2231	19461	0.11464	3212.71	173.626	-5.6542	0.694428	1	1	Null_Model_OpenChrom
DNaseI_Duke	Colo829	none	2730	19461	0.140281	2444.17	115.001	2.48544	1.11694	0.00646962	1	Null_Model_OpenChrom
DNaseI_Duke	ECC-1+DMSO_0.02pct	none	3013	19461	0.154822	2628.04	132.738	2.90014	1.14648	0.001865	1	Null_Model_OpenChrom
DNaseI_Duke	ECC-1+Estradiol_10nM_30m	none	3021	19461	0.155234	2742.88	138.343	2.01039	1.1014	0.0221948	1	Null_Model_OpenChrom
DNaseI_Duke	Fibrobl_GM03348+lenti-control	none	3563	19461	0.183084	3088.18	167.532	2.83419	1.15375	0.00229713	1	Null_Model_OpenChrom
DNaseI_Duke	Fibrobl_GM03348+lenti-MyoD	none	3213	19461	0.165099	3101.62	168.535	0.660846	1.03591	0.254356	1	Null_Model_OpenChrom
DNaseI_Duke	Fibrobl_GM03348	none	3463	19461	0.177946	3102.03	168.18	2.14632	1.11636	0.0159239	1	Null_Model_OpenChrom
DNaseI_Duke	Fibrobl	none	2632	19461	0.135245	2571.97	141.802	0.423352	1.02334	0.336019	1	Null_Model_OpenChrom
DNaseI_Duke	FibroP_AG08395	none	3583	19461	0.184112	3067.03	166.841	3.09255	1.16823	0.000992221	1	Null_Model_OpenChrom
DNaseI_Duke	FibroP_AG08396	none	3613	19461	0.185653	3418.16	179.118	1.0878	1.057	0.138342	1	Null_Model_OpenChrom
DNaseI_Duke	FibroP_AG20443	none	3641	19461	0.187092	3126.65	167.742	3.06631	1.16451	0.00108361	1	Null_Model_OpenChrom
DNaseI_Duke	FibroP	none	3619	19461	0.185962	3123.18	166.436	2.97905	1.15876	0.00144572	1	Null_Model_OpenChrom
DNaseI_Duke	Frontal_cortex_OC	none	2732	19461	0.140383	3856.29	186.163	-6.03927	0.708453	1	1	Null_Model_OpenChrom
DNaseI_Duke	GC_B_cell	none	2060	19461	0.105853	2470.84	126.395	-3.25046	0.833725	0.999424	1	Null_Model_OpenChrom
DNaseI_Duke	Gliobla	none	2954	19461	0.151791	2865.01	148.753	0.598253	1.03106	0.274835	1	Null_Model_OpenChrom
DNaseI_Duke	GM10248	none	2449	19461	0.125841	3405.78	122.369	-7.8188	0.719071	1	1	Null_Model_OpenChrom
DNaseI_Duke	GM10266	none	2485	19461	0.127691	3811.22	93.6614	-14.1597	0.652022	1	1	Null_Model_OpenChrom
DNaseI_Duke	GM12878	none	2504	19461	0.128668	3085.68	161.279	-3.60665	0.811491	0.999845	1	Null_Model_OpenChrom
DNaseI_Duke	GM12891	none	2756	19461	0.141617	4387.01	227.91	-7.1564	0.628218	1	1	Null_Model_OpenChrom
DNaseI_Duke	GM12982	none	2811	19461	0.144443	4526.54	239.649	-7.15853	0.621005	1	1	Null_Model_OpenChrom
DNaseI_Duke	GM13976	none	2605	19461	0.133857	3974.61	191.925	-7.13619	0.65541	1	1	Null_Model_OpenChrom
DNaseI_Duke	GM13977	none	2555	19461	0.131288	3886.81	134.238	-9.92125	0.657351	1	1	Null_Model_OpenChrom
DNaseI_Duke	GM18507	none	2169	19461	0.111454	2401.53	126.512	-1.83804	0.903173	0.966972	1	Null_Model_OpenChrom
DNaseI_Duke	GM19238	none	2548	19461	0.130929	3470.12	185.752	-4.96423	0.734269	1	1	Null_Model_OpenChrom
DNaseI_Duke	GM19239	none	2689	19461	0.138174	3722.73	185.428	-5.5748	0.72232	1	1	Null_Model_OpenChrom
DNaseI_Duke	GM19240	none	2421	19461	0.124403	3294.48	179.308	-4.87139	0.734866	0.999999	1	Null_Model_OpenChrom
DNaseI_Duke	GM20000	none	2514	19461	0.129181	3728.83	128.103	-9.4832	0.674206	1	1	Null_Model_OpenChrom
DNaseI_Duke	H1-hESC	none	2473	19461	0.127075	3973.43	204.442	-7.33915	0.622385	1	1	Null_Model_OpenChrom
DNaseI_Duke	H7-hESC	none	2757	19461	0.141668	4510.44	240.159	-7.30117	0.611248	1	1	Null_Model_OpenChrom
DNaseI_Duke	H9ES	none	2331	19461	0.119778	3269.59	172.289	-5.44775	0.712934	1	1	Null_Model_OpenChrom
DNaseI_Duke	Heart_OC	none	3521	19461	0.180926	3799.2	189.036	-1.47165	0.926775	0.929443	1	Null_Model_OpenChrom
DNaseI_Duke	HEK293T	none	2413	19461	0.123992	2629.94	174.692	-1.24183	0.917512	0.89285	1	Null_Model_OpenChrom
DNaseI_Duke	HeLa-S3+INFa4h	none	3924	19461	0.201634	3407.41	184.843	2.79475	1.15161	0.00259696	1	Null_Model_OpenChrom
DNaseI_Duke	HeLa-S3	none	3640	19461	0.187041	3260.12	183.019	2.07566	1.11652	0.0189628	1	Null_Model_OpenChrom
DNaseI_Duke	HMEC	none	3423	19461	0.17589	3856.34	205.143	-2.11237	0.88763	0.982673	1	Null_Model_OpenChrom
DNaseI_Duke	HSMM_emb	none	2834	19461	0.145625	3187.01	162.366	-2.17417	0.889234	0.985154	1	Null_Model_OpenChrom
DNaseI_Duke	HSMM_FSHD	none	3694	19461	0.189816	3741.93	189.455	-0.252973	0.987192	0.599856	1	Null_Model_OpenChrom
DNaseI_Duke	HSMM	none	3289	19461	0.169005	3931.25	199.241	-3.22351	0.836629	0.999367	1	Null_Model_OpenChrom
DNaseI_Duke	HTR8svn	none	2876	19461	0.147783	2696.97	103.811	1.72457	1.06638	0.0423027	1	Null_Model_OpenChrom
DNaseI_Duke	HUVEC	none	2812	19461	0.144494	3342.56	172.33	-3.07876	0.84127	0.998961	1	Null_Model_OpenChrom
DNaseI_Duke	IMR90	none	3619	19461	0.185962	4022.69	119.49	-3.37845	0.899646	0.999636	1	Null_Model_OpenChrom
DNaseI_Duke	iPS_CWRU1	none	2411	19461	0.123889	3300.16	178.084	-4.99296	0.73057	1	1	Null_Model_OpenChrom
DNaseI_Duke	iPS_NIHi7	none	2497	19461	0.128308	3109.93	168.552	-3.63646	0.802911	0.999862	1	Null_Model_OpenChrom
DNaseI_Duke	iPS	none	2707	19461	0.139099	4332.44	229.114	-7.09448	0.624821	1	1	Null_Model_OpenChrom
DNaseI_Duke	iSP_NIHi11	none	2717	19461	0.139613	3345.91	177.334	-3.54648	0.812036	0.999805	1	Null_Model_OpenChrom
DNaseI_Duke	K562+G1_phase	none	2262	19461	0.116232	2565.85	159.225	-1.90831	0.881579	0.971824	1	Null_Model_OpenChrom
DNaseI_Duke	K562+G2-M_phase	none	2193	19461	0.112687	2507.17	161.245	-1.94837	0.874693	0.974315	1	Null_Model_OpenChrom
DNaseI_Duke	K562+NaBut	none	2515	19461	0.129233	3036.44	204.267	-2.55274	0.828272	0.994656	1	Null_Model_OpenChrom
DNaseI_Duke	K562	none	2527	19461	0.129849	2759.49	177.189	-1.31208	0.91575	0.905253	1	Null_Model_OpenChrom
DNaseI_Duke	K562+SAHA_1uM_72hr	none	2590	19461	0.133087	2912.89	125.947	-2.56368	0.889152	0.994822	1	Null_Model_OpenChrom
DNaseI_Duke	K562+SAHA_ctrl	none	2634	19461	0.135348	3188.56	118.643	-4.67418	0.826078	0.999999	1	Null_Model_OpenChrom
DNaseI_Duke	MCF7+Hypoxia_LacAcid_ctrl	none	3495	19461	0.17959	3097.95	172.163	2.30624	1.12817	0.0105486	1	Null_Model_OpenChrom
DNaseI_Duke	MCF7+Hypoxia_LacAcid	none	3341	19461	0.171677	2853.27	157.621	3.09431	1.17094	0.00098635	1	Null_Model_OpenChrom
DNaseI_Duke	Medullo_D341	none	2669	19461	0.137146	3857.89	197.39	-6.02307	0.691828	1	1	Null_Model_OpenChrom
DNaseI_Duke	Medullo	none	2194	19461	0.112738	3526.04	197.718	-6.73706	0.622228	1	1	Null_Model_OpenChrom
DNaseI_Duke	Mel_2183	none	2571	19461	0.13211	2329.6	150.365	1.60543	1.10362	0.0541994	1	Null_Model_OpenChrom
DNaseI_Duke	Melano	none	2957	19461	0.151945	2621.62	138.835	2.41568	1.12793	0.00785285	1	Null_Model_OpenChrom
DNaseI_Duke	Monocytes_CD14+	none	2909	19461	0.149478	4340.24	208.322	-6.87036	0.670239	1	1	Null_Model_OpenChrom
DNaseI_Duke	Myometr	none	3076	19461	0.15806	3634.28	186.392	-2.99522	0.846384	0.998629	1	Null_Model_OpenChrom
DNaseI_Duke	Naive_B_cell	none	1890	19461	0.0971173	2322.37	124.59	-3.47032	0.813824	0.99974	1	Null_Model_OpenChrom
DNaseI_Duke	NHEK	none	2918	19461	0.149941	3136.18	172.643	-1.26374	0.930433	0.896838	1	Null_Model_OpenChrom
DNaseI_Duke	Olf_neurosphere	none	2877	19461	0.147834	2731.02	149.051	0.979389	1.05345	0.163694	1	Null_Model_OpenChrom
DNaseI_Duke	Osteobl	none	2936	19461	0.150866	3748.42	194.412	-4.17886	0.783263	0.999985	1	Null_Model_OpenChrom
DNaseI_Duke	PanIsletD	none	3281	19461	0.168594	3364.17	176.152	-0.472136	0.975278	0.681585	1	Null_Model_OpenChrom
DNaseI_Duke	pHTC	none	3736	19461	0.191974	3678.96	198.29	0.287685	1.01551	0.386794	1	Null_Model_OpenChrom
DNaseI_Duke	ProgFib	none	2910	19461	0.14953	3197.05	165.892	-1.73037	0.910213	0.958218	1	Null_Model_OpenChrom
DNaseI_Duke	Psoas_muscle_OC	none	3381	19461	0.173732	4462.99	101.802	-10.6283	0.757564	1	1	Null_Model_OpenChrom
DNaseI_Duke	SK-N-SH	none	2384	19461	0.122501	3180.94	106.388	-7.49083	0.749464	1	1	Null_Model_OpenChrom
DNaseI_Duke	Stellate	none	3276	19461	0.168337	3456.4	192.675	-0.936317	0.947806	0.825445	1	Null_Model_OpenChrom
DNaseI_Duke	T-47D+Estradiol_10nM_30m	none	4972	19461	0.255485	4628.86	220.702	1.55476	1.07413	0.0600012	1	Null_Model_OpenChrom
DNaseI_Duke	T-47D	none	4366	19461	0.224346	4817.5	218.713	-2.06436	0.906279	0.980508	1	Null_Model_OpenChrom
DNaseI_Duke	Urothelia	none	2718	19461	0.139664	2547.52	108.235	1.57513	1.06692	0.0576128	1	Null_Model_OpenChrom
DNaseI_Duke	Urothelia+UT189	none	2736	19461	0.140589	2579.1	112.382	1.39611	1.06083	0.0813414	1	Null_Model_OpenChrom
eQTLs	Any	none	536	19461	0.0275423	444.678	28.7844	3.17261	1.20537	0.00075538	1	Null_Model_OpenChrom
eQTLs	MRCA	none	1055	19461	0.054211	1007.96	30.6659	1.53392	1.04667	0.0625252	1	Null_Model_OpenChrom
eQTLs	MRCE	none	1236	19461	0.0635116	1209.29	34.4278	0.775923	1.02209	0.218897	1	Null_Model_OpenChrom
EZH2_Broad	CD20+_RO01794	none	6275	19461	0.32244	6056.33	311.871	0.701143	1.03611	0.241607	1	Null_Model_OpenChrom
EZH2_Broad	Dnd41	none	6986	19461	0.358974	8124.45	408.178	-2.7891	0.859874	0.997357	1	Null_Model_OpenChrom
EZH2_Broad	GM12878	none	7300	19461	0.375109	7750.29	640.741	-0.702758	0.941901	0.758897	1	Null_Model_OpenChrom
EZH2_Broad	H1-hESC	none	4148	19461	0.213144	5460.92	275.954	-4.75775	0.759579	0.999999	1	Null_Model_OpenChrom
EZH2_Broad	HeLa-S3	none	5172	19461	0.265762	6895.14	299.713	-5.74931	0.750093	1	1	Null_Model_OpenChrom
EZH2_Broad	HepG2	none	6583	19461	0.338266	7927.14	203.587	-6.60231	0.830438	1	1	Null_Model_OpenChrom
EZH2_Broad	HMEC	none	7032	19461	0.361338	9068.86	466.846	-4.36302	0.775401	0.999994	1	Null_Model_OpenChrom
EZH2_Broad	HSMM	none	8180	19461	0.420328	8527.2	381.056	-0.911154	0.959283	0.818893	1	Null_Model_OpenChrom
EZH2_Broad	HSMMtube	none	2897	19461	0.148862	3408.7	164.364	-3.11319	0.849885	0.999075	1	Null_Model_OpenChrom
EZH2_Broad	HUVEC	none	4868	19461	0.250141	5820.07	286.63	-3.3216	0.836416	0.999552	1	Null_Model_OpenChrom
EZH2_Broad	K562	none	7855	19461	0.403628	9614.31	467.539	-3.76293	0.817011	0.999916	1	Null_Model_OpenChrom
EZH2_Broad	NH-A	none	7526	19461	0.386722	8893.48	439.515	-3.11134	0.846238	0.999069	1	Null_Model_OpenChrom
EZH2_Broad	NHDF-Ad	none	3736	19461	0.191974	4789.01	143.22	-7.35243	0.780119	1	1	Null_Model_OpenChrom
EZH2_Broad	NHEK	none	4850	19461	0.249216	6858.29	529.847	-3.79033	0.707173	0.999925	1	Null_Model_OpenChrom
EZH2_Broad	NHLF	none	6041	19461	0.310416	7368.84	138.799	-9.56664	0.819804	1	1	Null_Model_OpenChrom
FANTOM5_enhancer_cell	bronchial_smooth_muscle_cell	none	24	19461	0.00123324	15.6144	3.99364	2.09974	1.53704	0.0178757	1	Null_Model_OpenChrom
FANTOM5_enhancer_cell	cardiac_myocyte	none	29	19461	0.00149016	20.4256	4.62068	1.85566	1.41979	0.0317509	1	Null_Model_OpenChrom
FANTOM5_enhancer_cell	ciliated_epithelial_cell	none	42	19461	0.00215816	28.8392	5.2493	2.50716	1.45635	0.00608523	1	Null_Model_OpenChrom
FANTOM5_enhancer_cell	circulating_cell	none	55	19461	0.00282617	38.8022	6.07477	2.66641	1.41745	0.00383336	1	Null_Model_OpenChrom
FANTOM5_enhancer_cell	corneal_epithelial_cell	none	27	19461	0.00138739	16.4176	4.13346	2.56019	1.64458	0.00523079	1	Null_Model_OpenChrom
FANTOM5_enhancer_cell	endothelial_cell_of_lymphatic_vessel	none	39	19461	0.00200401	25.6124	4.9755	2.69071	1.5227	0.00356504	1	Null_Model_OpenChrom
FANTOM5_enhancer_cell	epithelial_cell_of_Malassez	none	36	19461	0.00184985	31.2897	5.58372	0.843575	1.15054	0.199454	1	Null_Model_OpenChrom
FANTOM5_enhancer_cell	fibroblast_of_periodontium	none	61	19461	0.00313447	44.0709	6.65191	2.54499	1.38413	0.00546401	1	Null_Model_OpenChrom
FANTOM5_enhancer_cell	fibroblast_of_pulmonary_artery	none	21	19461	0.00107908	15.4216	3.7736	1.47827	1.36173	0.0696672	1	Null_Model_OpenChrom
FANTOM5_enhancer_cell	fibroblast_of_tunica_adventitia_of_artery	none	43	19461	0.00220955	29.4755	5.56827	2.42885	1.45884	0.00757348	1	Null_Model_OpenChrom
FANTOM5_enhancer_cell	hepatic_stellate_cell	none	32	19461	0.00164431	22.7113	4.71122	1.97162	1.40899	0.0243267	1	Null_Model_OpenChrom
FANTOM5_enhancer_cell	iris_pigment_epithelial_cell	none	18	19461	0.000924927	12.2967	3.5212	1.6197	1.46381	0.0526483	1	Null_Model_OpenChrom
FANTOM5_enhancer_cell	keratocyte	none	17	19461	0.000873542	10.1379	3.24175	2.1168	1.67688	0.0171385	1	Null_Model_OpenChrom
FANTOM5_enhancer_cell	lens_epithelial_cell	none	40	19461	0.00205539	29.7413	5.58122	1.83808	1.34493	0.0330251	1	Null_Model_OpenChrom
FANTOM5_enhancer_cell	lymphocyte_of_B_lineage	none	53	19461	0.0027234	47.6953	6.91173	0.767491	1.11122	0.221395	1	Null_Model_OpenChrom
FANTOM5_enhancer_cell	natural_killer_cell	none	101	19461	0.00518987	83.7932	8.98355	1.91537	1.20535	0.0277229	1	Null_Model_OpenChrom
FANTOM5_enhancer_cell	neuronal_stem_cell	none	9	19461	0.000462463	9.23377	2.98819	-0.07823	0.974684	0.531177	1	Null_Model_OpenChrom
FANTOM5_enhancer_cell	osteoblast	none	59	19461	0.0030317	38.7992	6.41254	3.1502	1.52065	0.000815784	1	Null_Model_OpenChrom
FANTOM5_enhancer_cell	smooth_muscle_cell_of_the_esophagus	none	16	19461	0.000822157	10.4785	3.20559	1.72245	1.52693	0.0424936	1	Null_Model_OpenChrom
FANTOM5_enhancer_cell	smooth_muscle_cell_of_trachea	none	17	19461	0.000873542	9.2028	2.98761	2.60984	1.84726	0.00452918	1	Null_Model_OpenChrom
FANTOM5_enhancer_cell	T_cell	none	128	19461	0.00657726	105.404	10.1793	2.21983	1.21438	0.0132152	1	Null_Model_OpenChrom
FANTOM5_enhancer_cell	trabecular_meshwork_cell	none	37	19461	0.00190124	22.1059	4.69071	3.17523	1.67376	0.000748579	1	Null_Model_OpenChrom
FANTOM5_enhancer_cell	uterine_smooth_muscle_cell	none	34	19461	0.00174708	19.4166	4.40809	3.30833	1.75108	0.000469275	1	Null_Model_OpenChrom
H2A.Z_Broad	A549	none	7350	19461	0.377678	7148.05	344.199	0.586725	1.02825	0.278694	1	Null_Model_OpenChrom
H2A.Z_Broad	CD20+	none	3145	19461	0.161605	3564.95	169.255	-2.48118	0.8822	0.993453	1	Null_Model_OpenChrom
H2A.Z_Broad	Dnd41	none	3653	19461	0.187709	3912.79	204.346	-1.27134	0.933604	0.898195	1	Null_Model_OpenChrom
H2A.Z_Broad	GM12878	none	3818	19461	0.196187	4142.34	222.45	-1.45803	0.921702	0.927583	1	Null_Model_OpenChrom
H2A.Z_Broad	H1-hESC	none	6681	19461	0.343302	7144.62	272.361	-1.70223	0.935109	0.955644	1	Null_Model_OpenChrom
H2A.Z_Broad	HeLa-S3	none	6698	19461	0.344176	6958.54	334.218	-0.779537	0.962559	0.782168	1	Null_Model_OpenChrom
H2A.Z_Broad	HMEC	none	4539	19461	0.233236	4781.62	247.595	-0.979907	0.94926	0.836434	1	Null_Model_OpenChrom
H2A.Z_Broad	HSMM	none	5042	19461	0.259082	5396.12	259.904	-1.36251	0.934375	0.913482	1	Null_Model_OpenChrom
H2A.Z_Broad	HSMMtube	none	4806	19461	0.246955	5126.09	237.133	-1.34985	0.937556	0.911467	1	Null_Model_OpenChrom
H2A.Z_Broad	HUVEC	none	5027	19461	0.258311	5306.59	248.005	-1.12737	0.947312	0.870207	1	Null_Model_OpenChrom
H2A.Z_Broad	K562	none	4553	19461	0.233955	4684.48	279.792	-0.469905	0.971934	0.680789	1	Null_Model_OpenChrom
H2A.Z_Broad	NH-A	none	4880	19461	0.250758	5588.89	294.601	-2.40628	0.87316	0.991942	1	Null_Model_OpenChrom
H2A.Z_Broad	NHDF-Ad	none	5204	19461	0.267407	5447.39	265.112	-0.918049	0.955321	0.820703	1	Null_Model_OpenChrom
H2A.Z_Broad	NHEK	none	5688	19461	0.292277	5832.92	298.978	-0.484729	0.975154	0.686066	1	Null_Model_OpenChrom
H2A.Z_Broad	NHLF	none	5971	19461	0.306819	6004.92	296.131	-0.114527	0.994352	0.54559	1	Null_Model_OpenChrom
H2A.Z_Broad	Osteoblasts	none	5775	19461	0.296747	5815.79	282.62	-0.144336	0.992986	0.557382	1	Null_Model_OpenChrom
H3K27Ac_Broad	CD20+_RO01794	none	3926	19461	0.201737	4159.55	341.9	-0.683105	0.943851	0.75273	1	Null_Model_OpenChrom
H3K27Ac_Broad	Dnd41	none	4398	19461	0.22599	4727.69	311.749	-1.05756	0.930263	0.854873	1	Null_Model_OpenChrom
H3K27Ac_Broad	GM12878	none	2782	19461	0.142953	2879.1	88.3735	-1.09878	0.966273	0.864068	1	Null_Model_OpenChrom
H3K27Ac_Broad	H1-hESC	none	5891	19461	0.302708	6414.61	199.331	-2.62681	0.918373	0.995691	1	Null_Model_OpenChrom
H3K27Ac_Broad	HMEC	none	3500	19461	0.179847	3307.46	170.743	1.12768	1.05821	0.129728	1	Null_Model_OpenChrom
H3K27Ac_Broad	HSMM	none	3454	19461	0.177483	3490.47	178.196	-0.204655	0.989552	0.581079	1	Null_Model_OpenChrom
H3K27Ac_Broad	HSMMtube	none	3987	19461	0.204871	4001.64	210.078	-0.0697044	0.996341	0.527786	1	Null_Model_OpenChrom
H3K27Ac_Broad	HUVEC	none	3160	19461	0.162376	3028.56	73.8904	1.77883	1.0434	0.0376337	1	Null_Model_OpenChrom
H3K27Ac_Broad	K562	none	2969	19461	0.152562	2969.87	90.6183	-0.00955804	0.999708	0.503813	1	Null_Model_OpenChrom
H3K27Ac_Broad	Monocytes-CD14+_RO01746	none	5261	19461	0.270336	4685.72	227.076	2.53343	1.12277	0.00564769	1	Null_Model_OpenChrom
H3K27Ac_Broad	NH-A	none	3430	19461	0.17625	3647.91	184.851	-1.17885	0.940264	0.880771	1	Null_Model_OpenChrom
H3K27Ac_Broad	NHDF-Ad	none	5228	19461	0.26864	5156.19	274.79	0.261338	1.01393	0.396916	1	Null_Model_OpenChrom
H3K27Ac_Broad	NHEK	none	3432	19461	0.176353	3345.04	180.815	0.480913	1.026	0.315289	1	Null_Model_OpenChrom
H3K27Ac_Broad	NHLF	none	3769	19461	0.193669	3545.5	182.052	1.22768	1.06304	0.109784	1	Null_Model_OpenChrom
H3K27Ac_Broad	Osteoblasts	none	5432	19461	0.279122	5137.18	368.04	0.80105	1.05739	0.211551	1	Null_Model_OpenChrom
H3K27Ac_UW	AG04450	none	1447	19461	0.0743538	1225.59	70.3322	3.148	1.18065	0.000821972	1	Null_Model_OpenChrom
H3K27Me3_Broad	A549	none	4388	19461	0.225477	5710.57	257.47	-5.13681	0.768399	1	1	Null_Model_OpenChrom
H3K27Me3_Broad	Dnd41	none	6765	19461	0.347618	7792.89	402.76	-2.55212	0.868099	0.994646	1	Null_Model_OpenChrom
H3K27Me3_Broad	GM12878	none	7170	19461	0.368429	8377.23	398.751	-3.02753	0.855892	0.998767	1	Null_Model_OpenChrom
H3K27Me3_Broad	H1-hESC	none	1871	19461	0.096141	3263.07	71.8004	-19.3881	0.573386	1	1	Null_Model_OpenChrom
H3K27Me3_Broad	HeLa-S3	none	4304	19461	0.22116	6270.1	174.735	-11.2518	0.686433	1	1	Null_Model_OpenChrom
H3K27Me3_Broad	HepG2	none	5683	19461	0.29202	8583.72	427.299	-6.7885	0.662067	1	1	Null_Model_OpenChrom
H3K27Me3_Broad	HMEC	none	3384	19461	0.173886	4659.15	211.444	-6.03067	0.726313	1	1	Null_Model_OpenChrom
H3K27Me3_Broad	HSMM	none	4853	19461	0.249371	6059.08	208.101	-5.79566	0.800946	1	1	Null_Model_OpenChrom
H3K27Me3_Broad	HSMMtube	none	6111	19461	0.314013	7692.58	373.433	-4.23523	0.794402	0.999989	1	Null_Model_OpenChrom
H3K27Me3_Broad	HUVEC	none	4249	19461	0.218334	5059.48	143.204	-5.65965	0.839809	1	1	Null_Model_OpenChrom
H3K27Me3_Broad	K562	none	5169	19461	0.265608	6984.65	383.123	-4.73909	0.740051	0.999999	1	Null_Model_OpenChrom
H3K27Me3_Broad	Monocytes-CD14+_RO01746	none	2821	19461	0.144957	4241.41	112.413	-12.6356	0.665109	1	1	Null_Model_OpenChrom
H3K27Me3_Broad	NH-A	none	4327	19461	0.222342	5656.82	174.691	-7.61241	0.764917	1	1	Null_Model_OpenChrom
H3K27Me3_Broad	NHDF-Ad	none	4858	19461	0.249627	6173.44	315.971	-4.16316	0.78692	0.999984	1	Null_Model_OpenChrom
H3K27Me3_Broad	NHEK	none	3527	19461	0.181234	5395.38	283.083	-6.60014	0.653707	1	1	Null_Model_OpenChrom
H3K27Me3_Broad	NHLF	none	4555	19461	0.234058	5819.78	161.607	-7.82626	0.782675	1	1	Null_Model_OpenChrom
H3K27Me3_Broad	Osteoblasts	none	4914	19461	0.252505	6196.79	227.76	-5.6322	0.792991	1	1	Null_Model_OpenChrom
H3K27Me3_SYDH	K562	none	1130	19461	0.0580648	2075.96	130.041	-7.27433	0.544327	1	1	Null_Model_OpenChrom
H3K27Me3_SYDH	MCF-7	none	169	19461	0.00868403	218.17	14.1654	-3.47112	0.774626	0.999741	1	Null_Model_OpenChrom
H3K27Me3_SYDH	NT2-D1	none	423	19461	0.0217358	1096.72	68.137	-9.88769	0.385696	1	1	Null_Model_OpenChrom
H3K27Me3_SYDH	PBMC	none	630	19461	0.0323724	1298.51	71.7353	-9.31913	0.485171	1	1	Null_Model_OpenChrom
H3K27Me3_UW	AG04450	none	120	19461	0.00616618	310.362	23.547	-8.08431	0.386646	1	1	Null_Model_OpenChrom
H3K27Me3_UW	BJ	none	247	19461	0.0126921	500.368	33.4744	-7.56899	0.493637	1	1	Null_Model_OpenChrom
H3K27Me3_UW	Caco-2	none	44	19461	0.00226093	82.8082	9.06351	-4.28181	0.531348	0.999991	1	Null_Model_OpenChrom
H3K27Me3_UW	GM06990	none	142	19461	0.00729664	233.071	17.0672	-5.33601	0.609257	1	1	Null_Model_OpenChrom
H3K27Me3_UW	GM12878	none	242	19461	0.0124351	396.929	27.3926	-5.65587	0.609681	1	1	Null_Model_OpenChrom
H3K27Me3_UW	H7-hESC	none	428	19461	0.0219927	1059.9	70.2506	-8.99492	0.403812	1	1	Null_Model_OpenChrom
H3K27Me3_UW	HepG2	none	76	19461	0.00390525	208.855	16.0735	-8.2655	0.363889	1	1	Null_Model_OpenChrom
H3K27Me3_UW	HMEC	none	39	19461	0.00200401	66.3996	8.21329	-3.33601	0.587353	0.999575	1	Null_Model_OpenChrom
H3K27Me3_UW	HRE	none	326	19461	0.0167515	961.783	40.2154	-15.8094	0.338954	1	1	Null_Model_OpenChrom
H3K27Me3_UW	HUVEC	none	561	19461	0.0288269	903.421	53.9577	-6.34609	0.620973	1	1	Null_Model_OpenChrom
H3K27Me3_UW	K562	none	18	19461	0.000924927	16.6244	3.92311	0.350647	1.08275	0.362927	1	Null_Model_OpenChrom
H3K27Me3_UW	Monocytes-CD14+_RO01746	none	316	19461	0.0162376	880.063	53.3346	-10.5759	0.359065	1	1	Null_Model_OpenChrom
H3K27Me3_UW	NHEK	none	52	19461	0.00267201	128.267	12.2304	-6.23581	0.405405	1	1	Null_Model_OpenChrom
H3K27Me3_UW	SAEC	none	211	19461	0.0108422	522.511	35.8299	-8.69418	0.403819	1	1	Null_Model_OpenChrom
H3K27Me3_UW	SK-N-SH_RA	none	269	19461	0.0138225	465.365	27.2425	-7.20803	0.578041	1	1	Null_Model_OpenChrom
H3K36Me3_Broad	Dnd41	none	4978	19461	0.255794	4942.15	257.123	0.139432	1.00725	0.444554	1	Null_Model_OpenChrom
H3K36Me3_Broad	GM12878	none	5524	19461	0.28385	5290.08	263.737	0.886953	1.04422	0.187552	1	Null_Model_OpenChrom
H3K36Me3_Broad	H1-hESC	none	4472	19461	0.229793	4419.53	79.7754	0.657753	1.01187	0.255348	1	Null_Model_OpenChrom
H3K36Me3_Broad	HeLa-S3	none	6124	19461	0.314681	5599.88	249.285	2.10248	1.09359	0.0177556	1	Null_Model_OpenChrom
H3K36Me3_Broad	HepG2	none	5617	19461	0.288629	4892.44	244.339	2.96539	1.1481	0.00151147	1	Null_Model_OpenChrom
H3K36Me3_Broad	HMEC	none	5397	19461	0.277324	5061.84	112.536	2.97825	1.06621	0.0014495	1	Null_Model_OpenChrom
H3K36Me3_Broad	HSMM	none	7051	19461	0.362314	7046.79	334.11	0.0125881	1.0006	0.494978	1	Null_Model_OpenChrom
H3K36Me3_Broad	HSMMtube	none	5859	19461	0.301064	5894.99	285.542	-0.126055	0.993894	0.550156	1	Null_Model_OpenChrom
H3K36Me3_Broad	HUVEC	none	5187	19461	0.266533	4929.65	95.3	2.70041	1.0522	0.00346265	1	Null_Model_OpenChrom
H3K36Me3_Broad	K562	none	4940	19461	0.253841	4681.43	235.459	1.09817	1.05523	0.136065	1	Null_Model_OpenChrom
H3K36Me3_Broad	Monocytes-CD14+_RO01746	none	4344	19461	0.223216	4273.47	210.708	0.334725	1.0165	0.368916	1	Null_Model_OpenChrom
H3K36Me3_Broad	NHDF-Ad	none	5883	19461	0.302297	5792.17	288.131	0.315232	1.01568	0.376293	1	Null_Model_OpenChrom
H3K36Me3_Broad	NHEK	none	5704	19461	0.293099	5407.31	124.874	2.3759	1.05487	0.0087532	1	Null_Model_OpenChrom
H3K36Me3_Broad	NHLF	none	5846	19461	0.300396	5671.96	124.77	1.39491	1.03068	0.0815209	1	Null_Model_OpenChrom
H3K36Me3_Broad	Osteoblasts	none	5105	19461	0.26232	5008.9	255.476	0.37618	1.01919	0.353391	1	Null_Model_OpenChrom
H3K36Me3_SYDH	MCF-7	none	547	19461	0.0281075	584.813	27.3878	-1.38066	0.935341	0.916308	1	Null_Model_OpenChrom
H3K36Me3_SYDH	NT2-D1	none	1651	19461	0.0848363	1684.04	62.3504	-0.529924	0.98038	0.701918	1	Null_Model_OpenChrom
H3K36Me3_SYDH	U2OS	none	1674	19461	0.0860182	1674.05	90.3764	-0.000508474	0.999973	0.500203	1	Null_Model_OpenChrom
H3K36Me3_UW	BJ	none	571	19461	0.0293407	699.099	42.3355	-3.02581	0.816766	0.99876	1	Null_Model_OpenChrom
H3K36Me3_UW	Caco-2	none	92	19461	0.0047274	104.211	10.5005	-1.16288	0.882826	0.87756	1	Null_Model_OpenChrom
H3K36Me3_UW	GM06990	none	669	19461	0.0343764	714.938	41.0007	-1.12042	0.935745	0.868733	1	Null_Model_OpenChrom
H3K36Me3_UW	GM12878	none	634	19461	0.032578	675.836	40.2731	-1.03881	0.938097	0.850554	1	Null_Model_OpenChrom
H3K36Me3_UW	H7-hESC	none	614	19461	0.0315503	657.13	43.8223	-0.9842	0.934366	0.837491	1	Null_Model_OpenChrom
H3K36Me3_UW	HeLa-S3	none	160	19461	0.00822157	165.455	15.3461	-0.355436	0.967033	0.638868	1	Null_Model_OpenChrom
H3K36Me3_UW	HepG2	none	399	19461	0.0205025	479.22	31.4167	-2.55341	0.832603	0.994666	1	Null_Model_OpenChrom
H3K36Me3_UW	HRE	none	96	19461	0.00493294	110.521	10.7175	-1.35494	0.868609	0.912281	1	Null_Model_OpenChrom
H3K36Me3_UW	HUVEC	none	836	19461	0.0429577	916.411	53.2297	-1.51063	0.912255	0.934559	1	Null_Model_OpenChrom
H3K36Me3_UW	K562	none	312	19461	0.0160321	378.526	29.8732	-2.22696	0.824249	0.987025	1	Null_Model_OpenChrom
H3K36Me3_UW	NHEK	none	485	19461	0.0249216	523.493	34.729	-1.10837	0.92647	0.866148	1	Null_Model_OpenChrom
H3K36Me3_UW	SAEC	none	544	19461	0.0279533	645.594	43.1836	-2.35262	0.842634	0.990679	1	Null_Model_OpenChrom
H3K36Me3_UW	SK-N-SH_RA	none	278	19461	0.014285	282.103	18.5746	-0.220888	0.985456	0.58741	1	Null_Model_OpenChrom
H3K4Me1_Broad	Dnd41	none	3065	19461	0.157494	3558.65	174.556	-2.82805	0.861281	0.997658	1	Null_Model_OpenChrom
H3K4Me1_Broad	GM12878	none	4921	19461	0.252865	5520.19	285.26	-2.1005	0.891455	0.982158	1	Null_Model_OpenChrom
H3K4Me1_Broad	H1-hESC	none	5229	19461	0.268691	6475.69	271.942	-4.58441	0.807481	0.999998	1	Null_Model_OpenChrom
H3K4Me1_Broad	HMEC	none	5670	19461	0.291352	5897.04	313.854	-0.72338	0.9615	0.765277	1	Null_Model_OpenChrom
H3K4Me1_Broad	HSMM	none	5446	19461	0.279842	5776.18	305.647	-1.08028	0.942837	0.859991	1	Null_Model_OpenChrom
H3K4Me1_Broad	HSMMtube	none	6138	19461	0.3154	6622.78	345.279	-1.40403	0.926801	0.919845	1	Null_Model_OpenChrom
H3K4Me1_Broad	HUVEC	none	4597	19461	0.236216	4744.98	201.416	-0.734714	0.968813	0.768743	1	Null_Model_OpenChrom
H3K4Me1_Broad	K562	none	5017	19461	0.257798	5114.87	288.577	-0.339157	0.980865	0.632754	1	Null_Model_OpenChrom
H3K4Me1_Broad	Monocytes-CD14+_RO01746	none	4796	19461	0.246442	4807.64	247.416	-0.0470598	0.997578	0.518767	1	Null_Model_OpenChrom
H3K4Me1_Broad	NH-A	none	5312	19461	0.272956	5756.54	235.66	-1.88634	0.922777	0.970376	1	Null_Model_OpenChrom
H3K4Me1_Broad	NHDF-Ad	none	6297	19461	0.32357	6565.13	321.922	-0.832901	0.959159	0.79755	1	Null_Model_OpenChrom
H3K4Me1_Broad	NHEK	none	4976	19461	0.255691	5100.66	229.266	-0.543719	0.975561	0.706683	1	Null_Model_OpenChrom
H3K4Me1_Broad	NHLF	none	5691	19461	0.292431	5301.18	192.937	2.02047	1.07354	0.0216671	1	Null_Model_OpenChrom
H3K4Me1_Broad	Osteoblasts	none	6320	19461	0.324752	6194.71	300.504	0.416939	1.02023	0.338362	1	Null_Model_OpenChrom
H3K4Me1_SYDH	K562	none	2128	19461	0.109347	2586.35	127.95	-3.58228	0.822781	0.99983	1	Null_Model_OpenChrom
H3K4Me1_SYDH	NT2-D1	none	403	19461	0.0207081	552.738	29.6429	-5.05141	0.729097	1	1	Null_Model_OpenChrom
H3K4Me1_SYDH	PBMC	none	3535	19461	0.181645	3522.97	180.634	0.0665987	1.00341	0.473451	1	Null_Model_OpenChrom
H3K4Me2_Broad	CD20+	none	3251	19461	0.167052	4076.46	207.257	-3.98276	0.797506	0.999966	1	Null_Model_OpenChrom
H3K4Me2_Broad	Dnd41	none	2144	19461	0.110169	2422.54	130.726	-2.13072	0.885021	0.983444	1	Null_Model_OpenChrom
H3K4Me2_Broad	GM12878	none	3470	19461	0.178305	3963.72	207.064	-2.38439	0.87544	0.991446	1	Null_Model_OpenChrom
H3K4Me2_Broad	H1-hESC	none	2821	19461	0.144957	3791.6	203.135	-4.77812	0.744012	0.999999	1	Null_Model_OpenChrom
H3K4Me2_Broad	HMEC	none	4385	19461	0.225322	4615.7	228.64	-1.00899	0.950019	0.843511	1	Null_Model_OpenChrom
H3K4Me2_Broad	HSMM	none	4735	19461	0.243307	5000.42	251.926	-1.05356	0.946921	0.853958	1	Null_Model_OpenChrom
H3K4Me2_Broad	HSMMtube	none	4677	19461	0.240327	4988.59	256.353	-1.21548	0.937539	0.887908	1	Null_Model_OpenChrom
H3K4Me2_Broad	HUVEC	none	3745	19461	0.192436	4006.18	198.773	-1.31394	0.934807	0.905567	1	Null_Model_OpenChrom
H3K4Me2_Broad	K562	none	3054	19461	0.156929	3176.35	166.665	-0.734095	0.961482	0.768555	1	Null_Model_OpenChrom
H3K4Me2_Broad	Monocytes-CD14+_RO01746	none	4047	19461	0.207954	4095.85	205.856	-0.237317	0.988073	0.593795	1	Null_Model_OpenChrom
H3K4Me2_Broad	NH-A	none	4935	19461	0.253584	5693.18	271.856	-2.78892	0.866826	0.997356	1	Null_Model_OpenChrom
H3K4Me2_Broad	NHDF-Ad	none	4925	19461	0.25307	5266.4	260.401	-1.31106	0.935174	0.905082	1	Null_Model_OpenChrom
H3K4Me2_Broad	NHEK	none	4296	19461	0.220749	4579.76	239.291	-1.18584	0.93804	0.882158	1	Null_Model_OpenChrom
H3K4Me2_Broad	NHLF	none	4474	19461	0.229896	4468.82	218.325	0.0237436	1.00116	0.490529	1	Null_Model_OpenChrom
H3K4Me2_Broad	Osteoblasts	none	5151	19461	0.264683	5155.24	246.327	-0.0172078	0.999178	0.506865	1	Null_Model_OpenChrom
H3K4Me3_Broad	Dnd41	none	1757	19461	0.0902831	1952.49	107.131	-1.82478	0.899876	0.965983	1	Null_Model_OpenChrom
H3K4Me3_Broad	GM12878	none	3687	19461	0.189456	4159.77	204.431	-2.3126	0.886348	0.989628	1	Null_Model_OpenChrom
H3K4Me3_Broad	H1-hESC	none	1869	19461	0.0960382	2490.08	117.287	-5.29538	0.750579	1	1	Null_Model_OpenChrom
H3K4Me3_Broad	HeLa-S3	none	3791	19461	0.1948	3416.67	132.862	2.81743	1.10956	0.0024205	1	Null_Model_OpenChrom
H3K4Me3_Broad	HMEC	none	2018	19461	0.103695	2197.71	119.715	-1.50112	0.91823	0.933338	1	Null_Model_OpenChrom
H3K4Me3_Broad	HSMM	none	2388	19461	0.122707	2613.66	120.052	-1.87968	0.913661	0.969924	1	Null_Model_OpenChrom
H3K4Me3_Broad	HSMMtube	none	3788	19461	0.194646	3938.47	147.532	-1.01991	0.961795	0.846114	1	Null_Model_OpenChrom
H3K4Me3_Broad	HUVEC	none	2300	19461	0.118185	2481.95	79.6729	-2.28374	0.92669	0.988807	1	Null_Model_OpenChrom
H3K4Me3_Broad	K562	none	2762	19461	0.141925	2917.51	84.7365	-1.8352	0.946698	0.966762	1	Null_Model_OpenChrom
H3K4Me3_Broad	Monocytes-CD14+_RO01746	none	3293	19461	0.16921	3291.17	167.443	0.0109301	1.00056	0.49564	1	Null_Model_OpenChrom
H3K4Me3_Broad	NH-A	none	2850	19461	0.146447	3232.43	162.446	-2.3542	0.881689	0.990719	1	Null_Model_OpenChrom
H3K4Me3_Broad	NHDF-Ad	none	3690	19461	0.18961	3915.62	190.03	-1.1873	0.942379	0.882445	1	Null_Model_OpenChrom
H3K4Me3_Broad	NHEK	none	2808	19461	0.144289	3080.89	163.184	-1.67227	0.911426	0.952764	1	Null_Model_OpenChrom
H3K4Me3_Broad	NHLF	none	3040	19461	0.15621	3112.92	150.496	-0.484526	0.976575	0.685994	1	Null_Model_OpenChrom
H3K4Me3_Broad	Osteoblasts	none	3714	19461	0.190843	3760.98	183.852	-0.255504	0.98751	0.600833	1	Null_Model_OpenChrom
H3K4Me3_SYDH	K562	none	1071	19461	0.0550331	1084.92	66.1969	-0.210343	0.987166	0.5833	1	Null_Model_OpenChrom
H3K4Me3_SYDH	NT2-D1	none	1094	19461	0.056215	1399.59	58.5194	-5.222	0.781658	1	1	Null_Model_OpenChrom
H3K4Me3_SYDH	PANC-1	none	1413	19461	0.0726068	1478.35	71.7919	-0.910292	0.955794	0.818666	1	Null_Model_OpenChrom
H3K4Me3_SYDH	PBMC	none	1249	19461	0.0641796	1164.41	43.647	1.93794	1.07264	0.0263152	1	Null_Model_OpenChrom
H3K4Me3_UW	AG04449	none	1163	19461	0.0597605	1375.76	76.7716	-2.77131	0.845352	0.997208	1	Null_Model_OpenChrom
H3K4Me3_UW	AG04450	none	1281	19461	0.065824	1398.81	74.2953	-1.58573	0.915777	0.9436	1	Null_Model_OpenChrom
H3K4Me3_UW	AG09309	none	1124	19461	0.0577565	1250.33	71.5185	-1.76639	0.898963	0.961335	1	Null_Model_OpenChrom
H3K4Me3_UW	AG09319	none	1248	19461	0.0641283	1314.11	70.8306	-0.933338	0.949693	0.824677	1	Null_Model_OpenChrom
H3K4Me3_UW	AG10803	none	1301	19461	0.0668517	1394.09	78.9749	-1.17868	0.933228	0.880736	1	Null_Model_OpenChrom
H3K4Me3_UW	AoAF	none	1374	19461	0.0706027	1475.11	80.9998	-1.24826	0.931457	0.894032	1	Null_Model_OpenChrom
H3K4Me3_UW	BE2_C	none	1051	19461	0.0540054	1270.54	66.4382	-3.30449	0.827204	0.999524	1	Null_Model_OpenChrom
H3K4Me3_UW	BJ	none	960	19461	0.0493294	1126.21	64.3396	-2.58326	0.85242	0.995106	1	Null_Model_OpenChrom
H3K4Me3_UW	Caco-2	none	1215	19461	0.0624326	1090.51	60.1173	2.07084	1.11416	0.0191867	1	Null_Model_OpenChrom
H3K4Me3_UW	CD20+_RO01778	none	987	19461	0.0507168	1186.04	67.7324	-2.9387	0.832178	0.998352	1	Null_Model_OpenChrom
H3K4Me3_UW	CD20+_RO01794	none	807	19461	0.0414676	951.268	60.3495	-2.39054	0.848342	0.991588	1	Null_Model_OpenChrom
H3K4Me3_UW	GM06990	none	1038	19461	0.0533374	1289.22	71.8755	-3.49515	0.805141	0.999763	1	Null_Model_OpenChrom
H3K4Me3_UW	GM12864	none	1170	19461	0.0601202	1440.36	81.1608	-3.33121	0.812295	0.999568	1	Null_Model_OpenChrom
H3K4Me3_UW	GM12865	none	1138	19461	0.0584759	1395.74	75.4655	-3.4153	0.81534	0.999681	1	Null_Model_OpenChrom
H3K4Me3_UW	GM12875	none	769	19461	0.0395149	957.19	56.8644	-3.30945	0.803393	0.999533	1	Null_Model_OpenChrom
H3K4Me3_UW	GM12878	none	1042	19461	0.053543	1270.3	73.2497	-3.11675	0.820278	0.999086	1	Null_Model_OpenChrom
H3K4Me3_UW	H7-hESC	none	885	19461	0.0454756	1278.8	74.277	-5.30178	0.692055	1	1	Null_Model_OpenChrom
H3K4Me3_UW	HAc	none	918	19461	0.0471713	1142.37	63.9068	-3.51092	0.803591	0.999777	1	Null_Model_OpenChrom
H3K4Me3_UW	HA-sp	none	899	19461	0.046195	1083.97	61.0681	-3.02886	0.829361	0.998773	1	Null_Model_OpenChrom
H3K4Me3_UW	HBMEC	none	998	19461	0.0512821	1177.7	66.4389	-2.70468	0.847417	0.996582	1	Null_Model_OpenChrom
H3K4Me3_UW	HCFaa	none	989	19461	0.0508196	1057.12	61.9724	-1.09928	0.935556	0.864176	1	Null_Model_OpenChrom
H3K4Me3_UW	HCF	none	891	19461	0.0457839	1097.65	60.6533	-3.40707	0.811734	0.999672	1	Null_Model_OpenChrom
H3K4Me3_UW	HCM	none	1106	19461	0.0568316	1214.52	66.1892	-1.63961	0.910644	0.949457	1	Null_Model_OpenChrom
H3K4Me3_UW	HCPEpiC	none	1265	19461	0.0650018	1264.74	68.4369	0.00378073	1.0002	0.498492	1	Null_Model_OpenChrom
H3K4Me3_UW	HCT-116	none	999	19461	0.0513334	1022.99	54.6677	-0.438797	0.976551	0.669596	1	Null_Model_OpenChrom
H3K4Me3_UW	HEEpiC	none	1099	19461	0.0564719	1156.7	67.8932	-0.849912	0.950114	0.802313	1	Null_Model_OpenChrom
H3K4Me3_UW	HEK293	none	969	19461	0.0497919	1112.4	64.4979	-2.22338	0.871087	0.986905	1	Null_Model_OpenChrom
H3K4Me3_UW	HeLa-S3	none	917	19461	0.0471199	945.832	56.4097	-0.511121	0.969517	0.695367	1	Null_Model_OpenChrom
H3K4Me3_UW	HFF-Myc	none	933	19461	0.047942	1189.92	69.7271	-3.68461	0.784088	0.999885	1	Null_Model_OpenChrom
H3K4Me3_UW	HFF	none	811	19461	0.0416731	1015.55	59.9875	-3.40987	0.798582	0.999675	1	Null_Model_OpenChrom
H3K4Me3_UW	HL-60	none	886	19461	0.045527	1002.77	56.7024	-2.05935	0.883552	0.98027	1	Null_Model_OpenChrom
H3K4Me3_UW	HMEC	none	1173	19461	0.0602744	1215.65	69.6737	-0.612116	0.964917	0.729769	1	Null_Model_OpenChrom
H3K4Me3_UW	HMF	none	1217	19461	0.0625353	1312.74	57.8773	-1.65414	0.927071	0.950951	1	Null_Model_OpenChrom
H3K4Me3_UW	HPAF	none	1075	19461	0.0552387	1180.62	66.4745	-1.58895	0.910535	0.943964	1	Null_Model_OpenChrom
H3K4Me3_UW	HPF	none	1258	19461	0.0646421	1355.21	75.9847	-1.27939	0.928267	0.899619	1	Null_Model_OpenChrom
H3K4Me3_UW	HRE	none	897	19461	0.0460922	1087.07	61.5342	-3.08882	0.825155	0.998995	1	Null_Model_OpenChrom
H3K4Me3_UW	HRPEpiC	none	1067	19461	0.0548276	1228.54	68.5038	-2.35809	0.868512	0.990816	1	Null_Model_OpenChrom
H3K4Me3_UW	HUVEC	none	872	19461	0.0448076	1039.44	58.2773	-2.87319	0.838912	0.997968	1	Null_Model_OpenChrom
H3K4Me3_UW	HVMF	none	1158	19461	0.0595036	1283.21	51.491	-2.4317	0.902424	0.992486	1	Null_Model_OpenChrom
H3K4Me3_UW	Jurkat	none	840	19461	0.0431632	1028.98	60.0451	-3.14732	0.816342	0.999176	1	Null_Model_OpenChrom
H3K4Me3_UW	K562	none	938	19461	0.048199	1133.33	41.2615	-4.73399	0.827648	0.999999	1	Null_Model_OpenChrom
H3K4Me3_UW	MCF-7	none	1510	19461	0.0775911	1311.71	71.7984	2.76173	1.15117	0.00287482	1	Null_Model_OpenChrom
H3K4Me3_UW	Monocytes-CD14+_RO01746	none	908	19461	0.0466574	946.978	56.3251	-0.692019	0.95884	0.755537	1	Null_Model_OpenChrom
H3K4Me3_UW	NB4	none	903	19461	0.0464005	955.778	53.8142	-0.98075	0.94478	0.836642	1	Null_Model_OpenChrom
H3K4Me3_UW	NHDF-neo	none	1230	19461	0.0632033	1333.15	72.6235	-1.42035	0.922626	0.922247	1	Null_Model_OpenChrom
H3K4Me3_UW	NHEK	none	845	19461	0.0434202	1015.8	60.2046	-2.83693	0.83186	0.997723	1	Null_Model_OpenChrom
H3K4Me3_UW	NHLF	none	1218	19461	0.0625867	1378.89	73.7598	-2.18131	0.883317	0.98542	1	Null_Model_OpenChrom
H3K4Me3_UW	PANC-1	none	1387	19461	0.0712707	1386.12	73.4187	0.0120421	1.00064	0.495196	1	Null_Model_OpenChrom
H3K4Me3_UW	RPTEC	none	1487	19461	0.0764092	1318.04	71.6819	2.35707	1.12819	0.00920995	1	Null_Model_OpenChrom
H3K4Me3_UW	SAEC	none	934	19461	0.0479934	1022.33	60.187	-1.46752	0.913603	0.928883	1	Null_Model_OpenChrom
H3K4Me3_UW	SK-N-MC	none	933	19461	0.047942	1098.31	62.6775	-2.6375	0.849486	0.995824	1	Null_Model_OpenChrom
H3K4Me3_UW	SK-N-SH_RA	none	841	19461	0.0432146	1055.2	59.7905	-3.58244	0.797008	0.99983	1	Null_Model_OpenChrom
H3K4Me3_UW	WERI-Rb-1	none	892	19461	0.0458353	1205.6	71.0338	-4.41473	0.739883	0.999995	1	Null_Model_OpenChrom
H3K4Me3_UW	WI-38	none	1159	19461	0.059555	1300.69	71.2277	-1.98923	0.891067	0.976662	1	Null_Model_OpenChrom
H3K79Me2_Broad	Dnd41	none	3807	19461	0.195622	3693.93	180.591	0.626134	1.03061	0.265613	1	Null_Model_OpenChrom
H3K79Me2_Broad	GM12878	none	3603	19461	0.18514	3565.37	174.066	0.216202	1.01056	0.414415	1	Null_Model_OpenChrom
H3K79Me2_Broad	H1-hESC	none	3700	19461	0.190124	3381.93	100.913	3.1519	1.09405	0.000811053	1	Null_Model_OpenChrom
H3K79Me2_Broad	HeLa-S3	none	3719	19461	0.1911	3450.34	174.35	1.54091	1.07786	0.0616692	1	Null_Model_OpenChrom
H3K79Me2_Broad	HMEC	none	4459	19461	0.229125	4316.33	211.607	0.674231	1.03305	0.250082	1	Null_Model_OpenChrom
H3K79Me2_Broad	HSMM	none	4402	19461	0.226196	4120.56	114.213	2.46418	1.0683	0.00686638	1	Null_Model_OpenChrom
H3K79Me2_Broad	HSMMtube	none	4991	19461	0.256462	4961.58	247.477	0.118898	1.00593	0.452678	1	Null_Model_OpenChrom
H3K79Me2_Broad	HUVEC	none	4238	19461	0.217769	4087.78	206.9	0.726073	1.03675	0.233897	1	Null_Model_OpenChrom
H3K79Me2_Broad	K562	none	3400	19461	0.174708	3232.34	162.077	1.03447	1.05187	0.150458	1	Null_Model_OpenChrom
H3K79Me2_Broad	Monocytes-CD14+_RO01746	none	3952	19461	0.203073	3707.61	181.897	1.34356	1.06592	0.0895452	1	Null_Model_OpenChrom
H3K79Me2_Broad	NH-A	none	4775	19461	0.245363	4745.79	239.298	0.122056	1.00615	0.451427	1	Null_Model_OpenChrom
H3K79Me2_Broad	NHDF-Ad	none	4282	19461	0.22003	4241.85	210.764	0.190497	1.00947	0.42446	1	Null_Model_OpenChrom
H3K79Me2_Broad	NHLF	none	4434	19461	0.22784	4382.45	208.351	0.247411	1.01176	0.402295	1	Null_Model_OpenChrom
H3K79Me2_Broad	Osteoblasts	none	5215	19461	0.267972	5168.1	235.278	0.199327	1.00907	0.421004	1	Null_Model_OpenChrom
H3K9Ac_Broad	Dnd41	none	2347	19461	0.1206	2560.75	126.634	-1.68793	0.916528	0.954288	1	Null_Model_OpenChrom
H3K9Ac_Broad	GM12878	none	2510	19461	0.128976	2637.72	123.546	-1.03381	0.951578	0.849387	1	Null_Model_OpenChrom
H3K9Ac_Broad	H1-hESC	none	4728	19461	0.242947	6065.9	303.604	-4.40673	0.779439	0.999995	1	Null_Model_OpenChrom
H3K9Ac_Broad	HeLa-S3	none	3654	19461	0.18776	3653.22	169.726	0.00458517	1.00021	0.498171	1	Null_Model_OpenChrom
H3K9Ac_Broad	HMEC	none	3157	19461	0.162222	3024.55	154.163	0.859133	1.04379	0.195134	1	Null_Model_OpenChrom
H3K9Ac_Broad	HSMM	none	3300	19461	0.16957	3131.43	87.3101	1.93071	1.05383	0.0267595	1	Null_Model_OpenChrom
H3K9Ac_Broad	HSMMtube	none	4336	19461	0.222805	4502.67	221.281	-0.753196	0.962985	0.774334	1	Null_Model_OpenChrom
H3K9Ac_Broad	HUVEC	none	2604	19461	0.133806	2604.37	79.0285	-0.00463926	0.999859	0.501851	1	Null_Model_OpenChrom
H3K9Ac_Broad	K562	none	3233	19461	0.166127	3248.09	88.0709	-0.17135	0.995354	0.568026	1	Null_Model_OpenChrom
H3K9Ac_Broad	Monocytes-CD14+_RO01746	none	3848	19461	0.197729	3835.78	187.896	0.0650137	1.00318	0.474082	1	Null_Model_OpenChrom
H3K9Ac_Broad	NH-A	none	4153	19461	0.213401	4552.27	216.592	-1.84342	0.912292	0.967366	1	Null_Model_OpenChrom
H3K9Ac_Broad	NHDF-Ad	none	4400	19461	0.226093	4296.09	187.056	0.555493	1.02419	0.289279	1	Null_Model_OpenChrom
H3K9Ac_Broad	NHEK	none	3234	19461	0.166179	3226.82	161.374	0.0445165	1.00223	0.482246	1	Null_Model_OpenChrom
H3K9Ac_Broad	NHLF	none	3069	19461	0.1577	3108.24	143.013	-0.274379	0.987376	0.608103	1	Null_Model_OpenChrom
H3K9Ac_SYDH	K562	none	1474	19461	0.0757412	1537.1	90.6715	-0.695873	0.958951	0.756746	1	Null_Model_OpenChrom
H3K9Ac_SYDH	NT2-D1	none	1259	19461	0.0646935	1588.76	74.6967	-4.41464	0.792442	0.999995	1	Null_Model_OpenChrom
H3K9Me1_Broad	HUVEC	none	8561	19461	0.439905	8487.53	69.6278	1.05512	1.00866	0.145686	1	Null_Model_OpenChrom
H3K9Me1_Broad	K562	none	7509	19461	0.385849	8618.84	514.895	-2.15548	0.871231	0.984438	1	Null_Model_OpenChrom
H3K9Me1_Broad	NHEK	none	7975	19461	0.409794	8016.68	86.7701	-0.480388	0.9948	0.684524	1	Null_Model_OpenChrom
H3K9Me3_Broad	A549	none	4194	19461	0.215508	4175.58	208.667	0.0882582	1.00441	0.464836	1	Null_Model_OpenChrom
H3K9Me3_Broad	Dnd41	none	2254	19461	0.115821	2316.8	113.855	-0.551556	0.972895	0.709374	1	Null_Model_OpenChrom
H3K9Me3_Broad	GM12878	none	3249	19461	0.166949	3827.22	164.832	-3.50795	0.848918	0.999774	1	Null_Model_OpenChrom
H3K9Me3_Broad	H1-hESC	none	2216	19461	0.113869	2535.64	138.736	-2.30398	0.87394	0.989388	1	Null_Model_OpenChrom
H3K9Me3_Broad	HeLa-S3	none	4862	19461	0.249833	5769.95	374.561	-2.42404	0.842641	0.992326	1	Null_Model_OpenChrom
H3K9Me3_Broad	HMEC	none	1673	19461	0.0859668	2385.64	101.137	-7.04626	0.70128	1	1	Null_Model_OpenChrom
H3K9Me3_Broad	HSMM	none	5278	19461	0.271209	6535.09	381.947	-3.29127	0.80764	0.999501	1	Null_Model_OpenChrom
H3K9Me3_Broad	HSMMtube	none	4658	19461	0.23935	6168.9	363.12	-4.16089	0.755078	0.999984	1	Null_Model_OpenChrom
H3K9Me3_Broad	HUVEC	none	2220	19461	0.114074	2474.99	102.071	-2.49811	0.896975	0.993757	1	Null_Model_OpenChrom
H3K9Me3_Broad	K562	none	4719	19461	0.242485	4739.25	330.211	-0.0613207	0.995727	0.524448	1	Null_Model_OpenChrom
H3K9Me3_Broad	Monocytes-CD14+_RO01746	none	1768	19461	0.0908484	2301.89	96.1778	-5.5511	0.768064	1	1	Null_Model_OpenChrom
H3K9Me3_Broad	NH-A	none	4918	19461	0.252711	5918.17	354.282	-2.8231	0.830999	0.997622	1	Null_Model_OpenChrom
H3K9Me3_Broad	NHDF-Ad	none	3338	19461	0.171523	3738.79	193.008	-2.07655	0.892802	0.981079	1	Null_Model_OpenChrom
H3K9Me3_Broad	NHEK	none	2215	19461	0.113817	3103.29	129.338	-6.86799	0.713758	1	1	Null_Model_OpenChrom
H3K9Me3_Broad	NHLF	none	3115	19461	0.160064	3676.22	301.258	-1.86293	0.847338	0.968764	1	Null_Model_OpenChrom
H3K9Me3_Broad	Osteoblasts	none	2783	19461	0.143004	2967.05	159.156	-1.15641	0.937969	0.876243	1	Null_Model_OpenChrom
H3K9Me3_SYDH	MCF-7	none	75	19461	0.00385386	55.5435	7.32983	2.65443	1.35029	0.00397208	1	Null_Model_OpenChrom
H3K9Me3_SYDH	NT2-D1	none	372	19461	0.0191152	449.888	22.6716	-3.43549	0.826872	0.999704	1	Null_Model_OpenChrom
H3K9Me3_SYDH	PBMC	none	67	19461	0.00344278	69.8961	8.29839	-0.348996	0.958566	0.636454	1	Null_Model_OpenChrom
H3K9Me3_SYDH	U2OS	none	333	19461	0.0171111	340.743	25.5102	-0.303536	0.977275	0.619259	1	Null_Model_OpenChrom
H3K9Me3_UW	AG04450	none	565	19461	0.0290324	1106.77	38.2925	-14.1482	0.510494	1	1	Null_Model_OpenChrom
H4K20Me1_Broad	A549	none	6783	19461	0.348543	8035.12	98.7039	-12.6856	0.844169	1	1	Null_Model_OpenChrom
H4K20Me1_Broad	CD20+_RO01794	none	4788	19461	0.246031	4632.92	203.687	0.761354	1.03347	0.223223	1	Null_Model_OpenChrom
H4K20Me1_Broad	Dnd41	none	6594	19461	0.338832	7909.56	79.1052	-16.6305	0.833674	1	1	Null_Model_OpenChrom
H4K20Me1_Broad	GM12878	none	6768	19461	0.347772	8181.95	364.173	-3.88263	0.827187	0.999948	1	Null_Model_OpenChrom
H4K20Me1_Broad	H1-hESC	none	6052	19461	0.310981	6879.81	279.774	-2.95884	0.879676	0.998456	1	Null_Model_OpenChrom
H4K20Me1_Broad	HeLa-S3	none	4470	19461	0.22969	5442.85	530.765	-1.83292	0.821261	0.966593	1	Null_Model_OpenChrom
H4K20Me1_Broad	HepG2	none	5419	19461	0.278454	6062.9	128.506	-5.01061	0.893797	1	1	Null_Model_OpenChrom
H4K20Me1_Broad	HMEC	none	6661	19461	0.342274	7380.61	361.165	-1.99246	0.9025	0.97684	1	Null_Model_OpenChrom
H4K20Me1_Broad	HSMM	none	6202	19461	0.318689	6818.42	343.931	-1.79228	0.909595	0.963456	1	Null_Model_OpenChrom
H4K20Me1_Broad	HSMMtube	none	4468	19461	0.229587	4560.62	247.976	-0.373502	0.979691	0.645613	1	Null_Model_OpenChrom
H4K20Me1_Broad	HUVEC	none	5737	19461	0.294795	5468.25	167.688	1.60268	1.04915	0.0545029	1	Null_Model_OpenChrom
H4K20Me1_Broad	K562	none	7444	19461	0.382509	9322.34	532.416	-3.52796	0.798512	0.999791	1	Null_Model_OpenChrom
H4K20Me1_Broad	Monocytes-CD14+_RO01746	none	3927	19461	0.201788	3773.17	103.906	1.48046	1.04077	0.0693748	1	Null_Model_OpenChrom
H4K20Me1_Broad	NH-A	none	6591	19461	0.338677	7324.1	325.107	-2.25494	0.899906	0.987931	1	Null_Model_OpenChrom
H4K20Me1_Broad	NHDF-Ad	none	5202	19461	0.267304	5698.15	152.335	-3.25694	0.912929	0.999437	1	Null_Model_OpenChrom
H4K20Me1_Broad	NHEK	none	5828	19461	0.299471	6540.13	143.955	-4.94687	0.891114	1	1	Null_Model_OpenChrom
H4K20Me1_Broad	NHLF	none	6026	19461	0.309645	6434.75	117.257	-3.48594	0.936478	0.999755	1	Null_Model_OpenChrom
H4K20Me1_Broad	Osteoblasts	none	6174	19461	0.31725	6384.49	140.989	-1.49292	0.967032	0.932271	1	Null_Model_OpenChrom
HDAC1_Broad	K562	none	5514	19461	0.283336	6516.1	407.965	-2.45634	0.846212	0.992982	1	Null_Model_OpenChrom
HDAC2_Broad	H1-hESC	none	4659	19461	0.239402	6138.91	334.952	-4.41826	0.75893	0.999995	1	Null_Model_OpenChrom
HDAC2_Broad	K562	none	5967	19461	0.306613	7160.1	381.207	-3.1298	0.833368	0.999125	1	Null_Model_OpenChrom
HDAC6_Broad	H1-hESC	none	7754	19461	0.398438	9546.79	328.194	-5.46258	0.81221	1	1	Null_Model_OpenChrom
HDAC6_Broad	K562	none	6501	19461	0.334053	8230.09	622.026	-2.77977	0.789907	0.99728	1	Null_Model_OpenChrom
HumanMouseConsRegTFBS	Any	ACAAT	2	19461	0.00010277	2.18581	1.5269	-0.121693	0.914991	0.548429	1	Null_Model_OpenChrom
HumanMouseConsRegTFBS	Any	AFP1	21	19461	0.00107908	18.9471	4.2603	0.481878	1.10835	0.314946	1	Null_Model_OpenChrom
HumanMouseConsRegTFBS	Any	AhR:Arnt	53	19461	0.0027234	37.1189	5.82828	2.72484	1.42784	0.00321665	1	Null_Model_OpenChrom
HumanMouseConsRegTFBS	Any	AhR	19	19461	0.000976312	13.3127	3.46224	1.64267	1.42721	0.0502259	1	Null_Model_OpenChrom
HumanMouseConsRegTFBS	Any	alpha-CP1	5	19461	0.000256924	3.20779	1.80077	0.995244	1.5587	0.159809	1	Null_Model_OpenChrom
HumanMouseConsRegTFBS	Any	ALX-3	50	19461	0.00256924	77.6873	8.66078	-3.19686	0.643606	0.999305	1	Null_Model_OpenChrom
HumanMouseConsRegTFBS	Any	Alx-4	83	19461	0.00426494	108.743	10.3271	-2.49279	0.763266	0.993663	1	Null_Model_OpenChrom
HumanMouseConsRegTFBS	Any	aMEF-2	88	19461	0.00452186	81.6863	9.25524	0.682174	1.07729	0.247564	1	Null_Model_OpenChrom
HumanMouseConsRegTFBS	Any	AML1	110	19461	0.00565233	121.978	10.5539	-1.13493	0.901802	0.871799	1	Null_Model_OpenChrom
HumanMouseConsRegTFBS	Any	AML2	332	19461	0.0170598	359.568	21.744	-1.26786	0.923329	0.897577	1	Null_Model_OpenChrom
HumanMouseConsRegTFBS	Any	AML	84	19461	0.00431632	105.866	10.5737	-2.06797	0.793455	0.980678	1	Null_Model_OpenChrom
HumanMouseConsRegTFBS	Any	AP-1	302	19461	0.0155182	308.652	18.746	-0.354867	0.978447	0.638656	1	Null_Model_OpenChrom
HumanMouseConsRegTFBS	Any	AP-2alphaA	81	19461	0.00416217	86.9181	9.14971	-0.646805	0.931912	0.741121	1	Null_Model_OpenChrom
HumanMouseConsRegTFBS	Any	AP-2beta	641	19461	0.0329377	688.439	33.71	-1.40726	0.931093	0.920324	1	Null_Model_OpenChrom
HumanMouseConsRegTFBS	Any	AP-2	815	19461	0.0418786	902.833	34.4888	-2.54671	0.902714	0.994563	1	Null_Model_OpenChrom
HumanMouseConsRegTFBS	Any	AP-4	101	19461	0.00518987	136.22	11.6258	-3.02945	0.741449	0.998775	1	Null_Model_OpenChrom
HumanMouseConsRegTFBS	Any	APOLYA	0	19461	0	0.173826	0.412012	-0.421895	0	0.663449	1	Null_Model_OpenChrom
HumanMouseConsRegTFBS	Any	AR	97	19461	0.00498433	105.8	10.039	-0.876599	0.916822	0.809648	1	Null_Model_OpenChrom
HumanMouseConsRegTFBS	Any	AREB6	66	19461	0.0033914	90.5674	9.8274	-2.49989	0.728739	0.993788	1	Null_Model_OpenChrom
HumanMouseConsRegTFBS	Any	ARP-1	107	19461	0.00549818	95.0879	10.0751	1.18233	1.12527	0.118538	1	Null_Model_OpenChrom
HumanMouseConsRegTFBS	Any	Arx	68	19461	0.00349417	105.589	9.89385	-3.79927	0.644004	0.999927	1	Null_Model_OpenChrom
HumanMouseConsRegTFBS	Any	ATF1	44	19461	0.00226093	39.3506	6.24787	0.744149	1.11815	0.228393	1	Null_Model_OpenChrom
HumanMouseConsRegTFBS	Any	ATF2:c-Jun	28	19461	0.00143877	21.6324	4.69284	1.35688	1.29436	0.0874091	1	Null_Model_OpenChrom
HumanMouseConsRegTFBS	Any	ATF2	21	19461	0.00107908	14.2448	3.79171	1.78158	1.47423	0.0374085	1	Null_Model_OpenChrom
HumanMouseConsRegTFBS	Any	ATF-3	207	19461	0.0106367	186.851	13.7355	1.46691	1.10783	0.0711996	1	Null_Model_OpenChrom
HumanMouseConsRegTFBS	Any	ATF3	108	19461	0.00554956	99.3027	10.0305	0.867084	1.08758	0.192948	1	Null_Model_OpenChrom
HumanMouseConsRegTFBS	Any	ATF-4	131	19461	0.00673141	122.942	10.9947	0.732896	1.06554	0.231811	1	Null_Model_OpenChrom
HumanMouseConsRegTFBS	Any	ATF4	179	19461	0.00919788	156.166	13.1738	1.7333	1.14622	0.0415208	1	Null_Model_OpenChrom
HumanMouseConsRegTFBS	Any	ATF5	60	19461	0.00308309	68.2048	8.30729	-0.987662	0.879704	0.838341	1	Null_Model_OpenChrom
HumanMouseConsRegTFBS	Any	ATF6	1	19461	5.13848e-05	1.07892	1.03478	-0.0762686	0.926852	0.530397	1	Null_Model_OpenChrom
HumanMouseConsRegTFBS	Any	avian	1	19461	5.13848e-05	1.46354	1.21529	-0.381422	0.683276	0.648555	1	Null_Model_OpenChrom
HumanMouseConsRegTFBS	Any	Bach1	2	19461	0.00010277	2.67233	1.63417	-0.411418	0.748411	0.659617	1	Null_Model_OpenChrom
HumanMouseConsRegTFBS	Any	Bach2	439	19461	0.0225579	487.183	23.6366	-2.03849	0.901099	0.979249	1	Null_Model_OpenChrom
HumanMouseConsRegTFBS	Any	Barbie	157	19461	0.00806742	167.555	13.2085	-0.799143	0.937003	0.787896	1	Null_Model_OpenChrom
HumanMouseConsRegTFBS	Any	Barhl-1	159	19461	0.00817019	202.346	14.8008	-2.9286	0.785784	0.998298	1	Null_Model_OpenChrom
HumanMouseConsRegTFBS	Any	Barhl2	28	19461	0.00143877	48.0929	7.05524	-2.84794	0.582206	0.9978	1	Null_Model_OpenChrom
HumanMouseConsRegTFBS	Any	Barx1	214	19461	0.0109964	235.063	16.3087	-1.29151	0.910394	0.901737	1	Null_Model_OpenChrom
HumanMouseConsRegTFBS	Any	Barx-2	230	19461	0.0118185	269.015	17.1645	-2.27301	0.854971	0.988487	1	Null_Model_OpenChrom
HumanMouseConsRegTFBS	Any	Bcl-6	330	19461	0.016957	327.915	20.0635	0.103916	1.00636	0.458618	1	Null_Model_OpenChrom
HumanMouseConsRegTFBS	Any	BCL6	178	19461	0.0091465	197.078	14.2559	-1.33825	0.903196	0.909593	1	Null_Model_OpenChrom
HumanMouseConsRegTFBS	Any	BDP1	604	19461	0.0310364	685.312	29.1732	-2.7872	0.881351	0.997342	1	Null_Model_OpenChrom
HumanMouseConsRegTFBS	Any	BEN	0	19461	0	0.739261	0.884843	-0.835471	0	0.798274	1	Null_Model_OpenChrom
HumanMouseConsRegTFBS	Any	Blimp-1	31	19461	0.00159293	32.4605	5.78124	-0.252634	0.955006	0.599725	1	Null_Model_OpenChrom
HumanMouseConsRegTFBS	Any	BRF-1	125	19461	0.0064231	128.145	11.2701	-0.279043	0.975459	0.609894	1	Null_Model_OpenChrom
HumanMouseConsRegTFBS	Any	Brn-2	130	19461	0.00668003	146.418	11.9656	-1.37207	0.887872	0.914979	1	Null_Model_OpenChrom
HumanMouseConsRegTFBS	Any	Brn-3c	52	19461	0.00267201	71.5155	8.82553	-2.21125	0.727115	0.986491	1	Null_Model_OpenChrom
HumanMouseConsRegTFBS	Any	Brn-4	220	19461	0.0113047	273.855	18.1627	-2.96515	0.803344	0.998487	1	Null_Model_OpenChrom
HumanMouseConsRegTFBS	Any	Bsx	264	19461	0.0135656	290.47	16.9873	-1.5582	0.908873	0.940407	1	Null_Model_OpenChrom
HumanMouseConsRegTFBS	Any	CACD	562	19461	0.0288783	559.873	28.5213	0.0745714	1.0038	0.470278	1	Null_Model_OpenChrom
HumanMouseConsRegTFBS	Any	Cart-1	52	19461	0.00267201	90.2108	9.14005	-4.18059	0.576428	0.999985	1	Null_Model_OpenChrom
HumanMouseConsRegTFBS	Any	CART1	79	19461	0.0040594	112.637	10.5805	-3.17918	0.701366	0.999262	1	Null_Model_OpenChrom
HumanMouseConsRegTFBS	Any	CCAAT	411	19461	0.0211192	426.082	25.1482	-0.599721	0.964603	0.725654	1	Null_Model_OpenChrom
HumanMouseConsRegTFBS	Any	Cdc5	486	19461	0.024973	552.27	26.034	-2.54551	0.880005	0.994544	1	Null_Model_OpenChrom
HumanMouseConsRegTFBS	Any	CDP	675	19461	0.0346848	748.175	31.2656	-2.34043	0.902196	0.990369	1	Null_Model_OpenChrom
HumanMouseConsRegTFBS	Any	Cdx-1	459	19461	0.0235856	507.46	24.5365	-1.975	0.904506	0.975866	1	Null_Model_OpenChrom
HumanMouseConsRegTFBS	Any	Cdx-2	408	19461	0.020965	459.88	23.3877	-2.21826	0.887188	0.986732	1	Null_Model_OpenChrom
HumanMouseConsRegTFBS	Any	Cdx	586	19461	0.0301115	653.681	28.0701	-2.41115	0.896461	0.992049	1	Null_Model_OpenChrom
HumanMouseConsRegTFBS	Any	CEBPE	666	19461	0.0342223	705.967	29.4432	-1.35743	0.943387	0.912677	1	Null_Model_OpenChrom
HumanMouseConsRegTFBS	Any	c-ets-1	409	19461	0.0210164	387.891	21.4937	0.982097	1.05442	0.163026	1	Null_Model_OpenChrom
HumanMouseConsRegTFBS	Any	c-Ets-1_p54	282	19461	0.0144905	253.133	16.6927	1.72933	1.11404	0.0418751	1	Null_Model_OpenChrom
HumanMouseConsRegTFBS	Any	c-Ets-2	76	19461	0.00390525	74.5814	8.89009	0.159569	1.01902	0.43661	1	Null_Model_OpenChrom
HumanMouseConsRegTFBS	Any	CHX10	27	19461	0.00138739	36.6234	6.0766	-1.58368	0.737234	0.943367	1	Null_Model_OpenChrom
HumanMouseConsRegTFBS	Any	CIZ	40	19461	0.00205539	45.0899	6.72249	-0.757146	0.887116	0.775519	1	Null_Model_OpenChrom
HumanMouseConsRegTFBS	Any	CKROX	104	19461	0.00534402	109.271	10.4967	-0.50213	0.951764	0.692212	1	Null_Model_OpenChrom
HumanMouseConsRegTFBS	Any	Clox	4	19461	0.000205539	5.31169	2.26114	-0.5801	0.753056	0.719077	1	Null_Model_OpenChrom
HumanMouseConsRegTFBS	Any	c-Maf	798	19461	0.0410051	867.093	33.056	-2.09018	0.920317	0.981699	1	Null_Model_OpenChrom
HumanMouseConsRegTFBS	Any	c-Myb	140	19461	0.00719387	141.139	12.9962	-0.0876302	0.991931	0.534915	1	Null_Model_OpenChrom
HumanMouseConsRegTFBS	Any	c-Myc	7	19461	0.000359694	5.14885	2.26734	0.816442	1.35953	0.207124	1	Null_Model_OpenChrom
HumanMouseConsRegTFBS	Any	c-Myc:Max	432	19461	0.0221982	416.497	21.6912	0.714738	1.03722	0.237385	1	Null_Model_OpenChrom
HumanMouseConsRegTFBS	Any	CNOT3	261	19461	0.0134114	219.127	15.5274	2.69672	1.19109	0.0035013	1	Null_Model_OpenChrom
HumanMouseConsRegTFBS	Any	COE1	212	19461	0.0108936	246.998	17.4179	-2.00931	0.858307	0.977748	1	Null_Model_OpenChrom
HumanMouseConsRegTFBS	Any	COUP-TF,	268	19461	0.0137711	242.575	15.7066	1.61872	1.10481	0.0527543	1	Null_Model_OpenChrom
HumanMouseConsRegTFBS	Any	CP2	163	19461	0.00837573	172.926	13.3027	-0.746168	0.942599	0.772217	1	Null_Model_OpenChrom
HumanMouseConsRegTFBS	Any	Cphx	40	19461	0.00205539	58.9041	7.67416	-2.46334	0.67907	0.993118	1	Null_Model_OpenChrom
HumanMouseConsRegTFBS	Any	CREB	256	19461	0.0131545	252.98	16.9941	0.177708	1.01194	0.429476	1	Null_Model_OpenChrom
HumanMouseConsRegTFBS	Any	CREB,	113	19461	0.00580648	94.8981	9.75334	1.85597	1.19075	0.031729	1	Null_Model_OpenChrom
HumanMouseConsRegTFBS	Any	c-Rel	683	19461	0.0350958	727.297	29.7118	-1.49088	0.939094	0.932003	1	Null_Model_OpenChrom
HumanMouseConsRegTFBS	Any	CREM	70	19461	0.00359694	57.3886	7.54691	1.67107	1.21975	0.0473542	1	Null_Model_OpenChrom
HumanMouseConsRegTFBS	Any	Crx	22	19461	0.00113047	28.994	5.48343	-1.27548	0.758778	0.89893	1	Null_Model_OpenChrom
HumanMouseConsRegTFBS	Any	CTCF	458	19461	0.0235342	448.931	23.752	0.381817	1.0202	0.351298	1	Null_Model_OpenChrom
HumanMouseConsRegTFBS	Any	CTF1	0	19461	0	0.258741	0.501982	-0.515439	0	0.696877	1	Null_Model_OpenChrom
HumanMouseConsRegTFBS	Any	Dax1	490	19461	0.0251786	501.254	26.5533	-0.423818	0.977549	0.664151	1	Null_Model_OpenChrom
HumanMouseConsRegTFBS	Any	Dbx-2	595	19461	0.030574	643.531	29.2754	-1.65776	0.924586	0.951317	1	Null_Model_OpenChrom
HumanMouseConsRegTFBS	Any	2014-12-02	672	19461	0.0345306	729.678	30.2194	-1.90865	0.920954	0.971846	1	Null_Model_OpenChrom
HumanMouseConsRegTFBS	Any	DEC	63	19461	0.00323724	59.5734	7.51458	0.45599	1.05752	0.324198	1	Null_Model_OpenChrom
HumanMouseConsRegTFBS	Any	Dlx-1	105	19461	0.00539541	150.254	12.5113	-3.61702	0.698818	0.999851	1	Null_Model_OpenChrom
HumanMouseConsRegTFBS	Any	Dlx-2	139	19461	0.00714249	191.508	14.9385	-3.51498	0.725816	0.99978	1	Null_Model_OpenChrom
HumanMouseConsRegTFBS	Any	dlx-3	40	19461	0.00205539	68.5874	8.25534	-3.4629	0.583197	0.999733	1	Null_Model_OpenChrom
HumanMouseConsRegTFBS	Any	dlx3	33	19461	0.0016957	58.8112	7.91109	-3.26266	0.561118	0.999448	1	Null_Model_OpenChrom
HumanMouseConsRegTFBS	Any	dlx5	135	19461	0.00693695	179.088	13.607	-3.24009	0.75382	0.999403	1	Null_Model_OpenChrom
HumanMouseConsRegTFBS	Any	Dlx7	71	19461	0.00364832	104.662	10.3595	-3.24941	0.678372	0.999422	1	Null_Model_OpenChrom
HumanMouseConsRegTFBS	Any	DMRT1	4	19461	0.000205539	3.22877	1.81786	0.424251	1.23886	0.335691	1	Null_Model_OpenChrom
HumanMouseConsRegTFBS	Any	DMRT2	34	19461	0.00174708	31.8651	5.61754	0.380035	1.067	0.35196	1	Null_Model_OpenChrom
HumanMouseConsRegTFBS	Any	DMRT3	39	19461	0.00200401	52.3477	7.10261	-1.87926	0.745019	0.969896	1	Null_Model_OpenChrom
HumanMouseConsRegTFBS	Any	DMRT4	531	19461	0.0272853	571.882	25.8735	-1.58008	0.928513	0.942956	1	Null_Model_OpenChrom
HumanMouseConsRegTFBS	Any	DMRT5	386	19461	0.0198345	392.175	22.5254	-0.274127	0.984255	0.608006	1	Null_Model_OpenChrom
HumanMouseConsRegTFBS	Any	DMRT7	937	19461	0.0481476	1020.78	36.496	-2.29563	0.917924	0.989151	1	Null_Model_OpenChrom
HumanMouseConsRegTFBS	Any	Dobox4	314	19461	0.0161348	333.666	20.7762	-0.946582	0.94106	0.828074	1	Null_Model_OpenChrom
HumanMouseConsRegTFBS	Any	Dobox5	65	19461	0.00334001	78.6134	8.8689	-1.53496	0.826831	0.937603	1	Null_Model_OpenChrom
HumanMouseConsRegTFBS	Any	D-Type	0	19461	0	0.0919081	0.302563	-0.303765	0	0.619347	1	Null_Model_OpenChrom
HumanMouseConsRegTFBS	Any	Duxl	104	19461	0.00534402	103.639	10.2643	0.0351352	1.00348	0.485986	1	Null_Model_OpenChrom
HumanMouseConsRegTFBS	Any	E12	34	19461	0.00174708	58.1868	7.75964	-3.117	0.584325	0.999086	1	Null_Model_OpenChrom
HumanMouseConsRegTFBS	Any	E2A	179	19461	0.00919788	211.906	15.168	-2.16944	0.844714	0.984975	1	Null_Model_OpenChrom
HumanMouseConsRegTFBS	Any	E2	35	19461	0.00179847	30.4186	5.41328	0.846329	1.15061	0.198685	1	Null_Model_OpenChrom
HumanMouseConsRegTFBS	Any	E2F1	221	19461	0.011356	234.464	16.2642	-0.827804	0.942577	0.796109	1	Null_Model_OpenChrom
HumanMouseConsRegTFBS	Any	E2F-1:DP-1	240	19461	0.0123324	201.724	14.1406	2.70679	1.18974	0.00339689	1	Null_Model_OpenChrom
HumanMouseConsRegTFBS	Any	E2F-1:DP-2	218	19461	0.0112019	185.675	13.5836	2.37968	1.17409	0.00866394	1	Null_Model_OpenChrom
HumanMouseConsRegTFBS	Any	E2F-4	184	19461	0.00945481	146.265	12.4442	3.03235	1.25799	0.00121329	1	Null_Model_OpenChrom
HumanMouseConsRegTFBS	Any	E2F-4:DP-1	18	19461	0.000924927	11.0689	3.3705	2.05639	1.62617	0.0198723	1	Null_Model_OpenChrom
HumanMouseConsRegTFBS	Any	E2F	731	19461	0.0375623	750.092	30.2459	-0.631223	0.974547	0.736053	1	Null_Model_OpenChrom
HumanMouseConsRegTFBS	Any	E47	48	19461	0.00246647	70.8212	8.43771	-2.70466	0.677763	0.996581	1	Null_Model_OpenChrom
HumanMouseConsRegTFBS	Any	E4BP4	2	19461	0.00010277	5.64336	2.40618	-1.51417	0.354399	0.935009	1	Null_Model_OpenChrom
HumanMouseConsRegTFBS	Any	E4F1	21	19461	0.00107908	10.5604	3.28795	3.1751	1.98855	0.000748924	1	Null_Model_OpenChrom
HumanMouseConsRegTFBS	Any	EAR2	205	19461	0.0105339	182.66	13.5555	1.64802	1.1223	0.0496744	1	Null_Model_OpenChrom
HumanMouseConsRegTFBS	Any	EBF	10	19461	0.000513848	14.9241	3.85879	-1.27607	0.670058	0.899034	1	Null_Model_OpenChrom
HumanMouseConsRegTFBS	Any	EBNA1	79	19461	0.0040594	85.5045	9.5018	-0.684554	0.923928	0.753187	1	Null_Model_OpenChrom
HumanMouseConsRegTFBS	Any	Egr-1	45	19461	0.00231232	40.8342	6.51356	0.639563	1.10202	0.261228	1	Null_Model_OpenChrom
HumanMouseConsRegTFBS	Any	Egr-2	7	19461	0.000359694	9.64036	3.10943	-0.849147	0.726114	0.8021	1	Null_Model_OpenChrom
HumanMouseConsRegTFBS	Any	Egr-3	0	19461	0	0.962038	1.02301	-0.940396	0	0.826493	1	Null_Model_OpenChrom
HumanMouseConsRegTFBS	Any	Egr	465	19461	0.0238939	446.366	23.3495	0.798062	1.04175	0.212417	1	Null_Model_OpenChrom
HumanMouseConsRegTFBS	Any	EHF	455	19461	0.0233801	443.494	24.7568	0.464781	1.02595	0.321044	1	Null_Model_OpenChrom
HumanMouseConsRegTFBS	Any	EKLF	104	19461	0.00534402	122.335	10.7091	-1.71206	0.850127	0.956558	1	Null_Model_OpenChrom
HumanMouseConsRegTFBS	Any	Elf-1	93	19461	0.00477879	86.04	9.4574	0.735936	1.08089	0.230885	1	Null_Model_OpenChrom
HumanMouseConsRegTFBS	Any	ELF1	420	19461	0.0215816	386.83	20.9342	1.58448	1.08575	0.0565419	1	Null_Model_OpenChrom
HumanMouseConsRegTFBS	Any	ELF2	390	19461	0.0200401	354.977	19.4663	1.79916	1.09866	0.035997	1	Null_Model_OpenChrom
HumanMouseConsRegTFBS	Any	Elk-1	372	19461	0.0191152	349.821	18.941	1.17094	1.0634	0.120811	1	Null_Model_OpenChrom
HumanMouseConsRegTFBS	Any	EMX2	144	19461	0.00739941	187.499	14.1142	-3.0819	0.768006	0.998972	1	Null_Model_OpenChrom
HumanMouseConsRegTFBS	Any	En-1	72	19461	0.00369971	104.923	9.97472	-3.30065	0.686217	0.999518	1	Null_Model_OpenChrom
HumanMouseConsRegTFBS	Any	En-2	120	19461	0.00616618	169.091	13.7243	-3.57693	0.709677	0.999826	1	Null_Model_OpenChrom
HumanMouseConsRegTFBS	Any	ERalpha	777	19461	0.039926	851.709	34.5306	-2.16357	0.912283	0.984751	1	Null_Model_OpenChrom
HumanMouseConsRegTFBS	Any	ER-beta	341	19461	0.0175222	331.183	20.0871	0.488731	1.02964	0.312516	1	Null_Model_OpenChrom
HumanMouseConsRegTFBS	Any	ER	401	19461	0.0206053	391.734	22.3391	0.414777	1.02365	0.339152	1	Null_Model_OpenChrom
HumanMouseConsRegTFBS	Any	ERG	442	19461	0.0227121	472.09	22.7412	-1.32314	0.936262	0.907106	1	Null_Model_OpenChrom
HumanMouseConsRegTFBS	Any	ERR1	272	19461	0.0139767	271.54	18.0075	0.0255194	1.00169	0.48982	1	Null_Model_OpenChrom
HumanMouseConsRegTFBS	Any	ERR2	91	19461	0.00467602	87.2957	9.2199	0.401772	1.04243	0.343926	1	Null_Model_OpenChrom
HumanMouseConsRegTFBS	Any	ERR3	359	19461	0.0184472	396.873	21.6072	-1.7528	0.904571	0.960182	1	Null_Model_OpenChrom
HumanMouseConsRegTFBS	Any	Esx1	64	19461	0.00328863	93.3666	9.78021	-3.00266	0.68547	0.998662	1	Null_Model_OpenChrom
HumanMouseConsRegTFBS	Any	Ets2	396	19461	0.0203484	371.896	20.5458	1.17318	1.06481	0.120362	1	Null_Model_OpenChrom
HumanMouseConsRegTFBS	Any	Ets	378	19461	0.0194235	364.453	21.3211	0.635402	1.03717	0.262583	1	Null_Model_OpenChrom
HumanMouseConsRegTFBS	Any	Evi-1	759	19461	0.0390011	859.854	35.5538	-2.83667	0.882708	0.997721	1	Null_Model_OpenChrom
HumanMouseConsRegTFBS	Any	Evx-1	109	19461	0.00560095	153.042	12.9906	-3.39029	0.712223	0.999651	1	Null_Model_OpenChrom
HumanMouseConsRegTFBS	Any	Evx2	30	19461	0.00154154	43.9411	6.48117	-2.15101	0.682733	0.984262	1	Null_Model_OpenChrom
HumanMouseConsRegTFBS	Any	FKLF	219	19461	0.0112533	209.49	15.1626	0.627234	1.0454	0.265253	1	Null_Model_OpenChrom
HumanMouseConsRegTFBS	Any	Fli-1	400	19461	0.0205539	375.376	21.8857	1.12514	1.0656	0.130266	1	Null_Model_OpenChrom
HumanMouseConsRegTFBS	Any	FLI1	170	19461	0.00873542	146.361	11.9668	1.97541	1.16151	0.0241109	1	Null_Model_OpenChrom
HumanMouseConsRegTFBS	Any	FOXD3	526	19461	0.0270284	577.927	26.6654	-1.94736	0.910149	0.974254	1	Null_Model_OpenChrom
HumanMouseConsRegTFBS	Any	FOX	402	19461	0.0206567	448.081	22.63	-2.03627	0.897159	0.979139	1	Null_Model_OpenChrom
HumanMouseConsRegTFBS	Any	FOXJ2	235	19461	0.0120754	264.822	17.0673	-1.74732	0.887388	0.959709	1	Null_Model_OpenChrom
HumanMouseConsRegTFBS	Any	FOXM1	347	19461	0.0178305	388.77	21.6591	-1.92853	0.892558	0.973106	1	Null_Model_OpenChrom
HumanMouseConsRegTFBS	Any	FOXO1	234	19461	0.012024	217.062	15.8567	1.06819	1.07803	0.142717	1	Null_Model_OpenChrom
HumanMouseConsRegTFBS	Any	FOXO3A	110	19461	0.00565233	115.624	11.0304	-0.509896	0.951356	0.694938	1	Null_Model_OpenChrom
HumanMouseConsRegTFBS	Any	FOXO3	25	19461	0.00128462	20.1758	4.4559	1.08265	1.23911	0.139482	1	Null_Model_OpenChrom
HumanMouseConsRegTFBS	Any	FOXO4	135	19461	0.00693695	132.181	11.7714	0.239494	1.02133	0.405361	1	Null_Model_OpenChrom
HumanMouseConsRegTFBS	Any	FOXP1	0	19461	0	0.033966	0.181232	-0.187417	0	0.574333	1	Null_Model_OpenChrom
HumanMouseConsRegTFBS	Any	FOXP3	246	19461	0.0126407	237.446	16.3426	0.523446	1.03603	0.300332	1	Null_Model_OpenChrom
HumanMouseConsRegTFBS	Any	FPM315	428	19461	0.0219927	443.921	23.7509	-0.670336	0.964135	0.748678	1	Null_Model_OpenChrom
HumanMouseConsRegTFBS	Any	FRA1	223	19461	0.0114588	232.786	15.3344	-0.638186	0.957961	0.738324	1	Null_Model_OpenChrom
HumanMouseConsRegTFBS	Any	Freac-2	21	19461	0.00107908	18.6314	4.35488	0.543903	1.12713	0.293254	1	Null_Model_OpenChrom
HumanMouseConsRegTFBS	Any	Freac-3	5	19461	0.000256924	4.17483	2.05679	0.401194	1.19765	0.344138	1	Null_Model_OpenChrom
HumanMouseConsRegTFBS	Any	Freac-4	9	19461	0.000462463	5.07592	2.27557	1.72443	1.77308	0.0423147	1	Null_Model_OpenChrom
HumanMouseConsRegTFBS	Any	Freac-7	197	19461	0.0101228	198.805	14.4574	-0.124863	0.99092	0.549684	1	Null_Model_OpenChrom
HumanMouseConsRegTFBS	Any	FXR	9	19461	0.000462463	5.34865	2.19256	1.66534	1.68267	0.0479229	1	Null_Model_OpenChrom
HumanMouseConsRegTFBS	Any	GABP-beta	240	19461	0.0123324	212.662	14.4123	1.89683	1.12855	0.0289251	1	Null_Model_OpenChrom
HumanMouseConsRegTFBS	Any	GABP	264	19461	0.0135656	226.546	14.4909	2.58463	1.16532	0.00487424	1	Null_Model_OpenChrom
HumanMouseConsRegTFBS	Any	GAF	298	19461	0.0153127	315.114	18.6683	-0.916733	0.94569	0.820359	1	Null_Model_OpenChrom
HumanMouseConsRegTFBS	Any	GATA-1	131	19461	0.00673141	147.364	12.6488	-1.29369	0.888957	0.902114	1	Null_Model_OpenChrom
HumanMouseConsRegTFBS	Any	GATA-2	72	19461	0.00369971	65.04	8.17119	0.851778	1.10701	0.197169	1	Null_Model_OpenChrom
HumanMouseConsRegTFBS	Any	GATA-3	126	19461	0.00647449	152.256	13.6585	-1.9223	0.827555	0.972716	1	Null_Model_OpenChrom
HumanMouseConsRegTFBS	Any	GATA-4	342	19461	0.0175736	422.232	21.2663	-3.77272	0.809982	0.999919	1	Null_Model_OpenChrom
HumanMouseConsRegTFBS	Any	GATA-X	86	19461	0.00441909	85.3776	9.139	0.0681013	1.00729	0.472852	1	Null_Model_OpenChrom
HumanMouseConsRegTFBS	Any	Gbx1	110	19461	0.00565233	150.703	12.9833	-3.13504	0.729911	0.999141	1	Null_Model_OpenChrom
HumanMouseConsRegTFBS	Any	Gbx2	84	19461	0.00431632	100.896	10.4378	-1.61875	0.83254	0.947249	1	Null_Model_OpenChrom
HumanMouseConsRegTFBS	Any	GC	610	19461	0.0313447	591.893	28.015	0.646329	1.03059	0.259033	1	Null_Model_OpenChrom
HumanMouseConsRegTFBS	Any	GCM	29	19461	0.00149016	32.5634	5.48618	-0.649529	0.890569	0.742002	1	Null_Model_OpenChrom
HumanMouseConsRegTFBS	Any	GCNF	34	19461	0.00174708	25.8861	5.05895	1.60387	1.31345	0.0543718	1	Null_Model_OpenChrom
HumanMouseConsRegTFBS	Any	Gfi1b	25	19461	0.00128462	29.1568	5.2083	-0.798119	0.857432	0.787599	1	Null_Model_OpenChrom
HumanMouseConsRegTFBS	Any	GKLF	266	19461	0.0136684	257.827	17.5483	0.465733	1.0317	0.320703	1	Null_Model_OpenChrom
HumanMouseConsRegTFBS	Any	GLI1	148	19461	0.00760495	144.679	11.5405	0.287743	1.02295	0.386772	1	Null_Model_OpenChrom
HumanMouseConsRegTFBS	Any	GLI2	23	19461	0.00118185	22.2148	4.79925	0.163612	1.03535	0.435018	1	Null_Model_OpenChrom
HumanMouseConsRegTFBS	Any	GLI3	232	19461	0.0119213	233.23	16.3199	-0.075354	0.994727	0.530033	1	Null_Model_OpenChrom
HumanMouseConsRegTFBS	Any	GLI	208	19461	0.010688	210.571	14.9195	-0.172354	0.987788	0.56842	1	Null_Model_OpenChrom
HumanMouseConsRegTFBS	Any	GR	13	19461	0.000668003	15.5315	4.04218	-0.626262	0.83701	0.734429	1	Null_Model_OpenChrom
HumanMouseConsRegTFBS	Any	Gsc	30	19461	0.00154154	38.2088	6.32561	-1.29771	0.78516	0.902806	1	Null_Model_OpenChrom
HumanMouseConsRegTFBS	Any	GSH2	187	19461	0.00960896	219.142	15.7303	-2.0433	0.853329	0.979489	1	Null_Model_OpenChrom
HumanMouseConsRegTFBS	Any	GTF2IRD1-isoform2	270	19461	0.0138739	303.91	18.413	-1.84163	0.888421	0.967236	1	Null_Model_OpenChrom
HumanMouseConsRegTFBS	Any	GZF1	0	19461	0	0	0	#NAME?	#NAME?	nan	nan	Null_Model_OpenChrom
HumanMouseConsRegTFBS	Any	Hand1:E47	448	19461	0.0230204	541.354	28.1738	-3.3135	0.827555	0.999539	1	Null_Model_OpenChrom
HumanMouseConsRegTFBS	Any	HB9	99	19461	0.0050871	141.84	12.1184	-3.53512	0.697969	0.999796	1	Null_Model_OpenChrom
HumanMouseConsRegTFBS	Any	hbp1	38	19461	0.00195262	33.8751	5.77922	0.713742	1.12177	0.237693	1	Null_Model_OpenChrom
HumanMouseConsRegTFBS	Any	HEB	4	19461	0.000205539	7.77423	2.85709	-1.321	0.514521	0.90675	1	Null_Model_OpenChrom
HumanMouseConsRegTFBS	Any	Helios	457	19461	0.0234829	448.153	21.2604	0.416132	1.01974	0.338657	1	Null_Model_OpenChrom
HumanMouseConsRegTFBS	Any	HES1	240	19461	0.0123324	227.568	15.4274	0.805809	1.05463	0.210176	1	Null_Model_OpenChrom
HumanMouseConsRegTFBS	Any	HFH1	45	19461	0.00231232	41.8661	6.06828	0.516434	1.07485	0.302776	1	Null_Model_OpenChrom
HumanMouseConsRegTFBS	Any	HFH3	89	19461	0.00457325	82.4915	9.15599	0.710845	1.0789	0.23859	1	Null_Model_OpenChrom
HumanMouseConsRegTFBS	Any	HFH4	40	19461	0.00205539	36.9131	6.05669	0.50967	1.08363	0.305141	1	Null_Model_OpenChrom
HumanMouseConsRegTFBS	Any	HFH8	78	19461	0.00400802	67.4695	7.85438	1.34071	1.15608	0.0900069	1	Null_Model_OpenChrom
HumanMouseConsRegTFBS	Any	HIC1	328	19461	0.0168542	323.426	19.3678	0.236187	1.01414	0.406644	1	Null_Model_OpenChrom
HumanMouseConsRegTFBS	Any	HLF	421	19461	0.021633	419.009	21.9002	0.0909126	1.00475	0.463781	1	Null_Model_OpenChrom
HumanMouseConsRegTFBS	Any	Hmbox1	171	19461	0.0087868	181.428	13.6367	-0.764671	0.942525	0.777766	1	Null_Model_OpenChrom
HumanMouseConsRegTFBS	Any	HMGA2	143	19461	0.00734803	161.697	13.7528	-1.35953	0.884368	0.91301	1	Null_Model_OpenChrom
HumanMouseConsRegTFBS	Any	HMX1	191	19461	0.0098145	235.343	15.8507	-2.79752	0.811583	0.997425	1	Null_Model_OpenChrom
HumanMouseConsRegTFBS	Any	Hmx3	0	19461	0	0.285714	0.531306	-0.537759	0	0.704628	1	Null_Model_OpenChrom
HumanMouseConsRegTFBS	Any	HNF-1A	625	19461	0.0321155	691.118	28.5402	-2.31666	0.904332	0.989739	1	Null_Model_OpenChrom
HumanMouseConsRegTFBS	Any	HNF-1alpha	480	19461	0.0246647	529.134	24.0467	-2.04327	0.907143	0.979487	1	Null_Model_OpenChrom
HumanMouseConsRegTFBS	Any	HNF-1beta	120	19461	0.00616618	129.068	11.198	-0.809781	0.929743	0.790967	1	Null_Model_OpenChrom
HumanMouseConsRegTFBS	Any	HNF1	786	19461	0.0403885	877.098	34.0504	-2.67538	0.896137	0.996268	1	Null_Model_OpenChrom
HumanMouseConsRegTFBS	Any	HNF3A	242	19461	0.0124351	232.52	15.8727	0.597223	1.04077	0.275179	1	Null_Model_OpenChrom
HumanMouseConsRegTFBS	Any	HNF3alpha	555	19461	0.0285186	615.618	26.3863	-2.29735	0.901533	0.989201	1	Null_Model_OpenChrom
HumanMouseConsRegTFBS	Any	HNF3beta	296	19461	0.0152099	340.553	19.2887	-2.30982	0.869173	0.989551	1	Null_Model_OpenChrom
HumanMouseConsRegTFBS	Any	HNF3	563	19461	0.0289297	632.977	27.923	-2.50607	0.889448	0.993896	1	Null_Model_OpenChrom
HumanMouseConsRegTFBS	Any	HNF-3gamma	333	19461	0.0171111	355.934	19.7437	-1.16159	0.935567	0.877298	1	Null_Model_OpenChrom
HumanMouseConsRegTFBS	Any	HNF-4alpha	784	19461	0.0402857	854.852	32.0668	-2.20951	0.917118	0.986431	1	Null_Model_OpenChrom
HumanMouseConsRegTFBS	Any	HNF4alpha	224	19461	0.0115102	211.1	14.4427	0.893191	1.06111	0.185878	1	Null_Model_OpenChrom
HumanMouseConsRegTFBS	Any	HNF4	919	19461	0.0472227	1009.9	35.2997	-2.57501	0.909994	0.994988	1	Null_Model_OpenChrom
HumanMouseConsRegTFBS	Any	HNF6	8	19461	0.000411079	7.52148	2.68548	0.178189	1.06362	0.429287	1	Null_Model_OpenChrom
HumanMouseConsRegTFBS	Any	Homez	291	19461	0.014953	269.919	18.192	1.1588	1.0781	0.123269	1	Null_Model_OpenChrom
HumanMouseConsRegTFBS	Any	HOXA10	645	19461	0.0331432	722.806	29.5951	-2.62903	0.892355	0.995718	1	Null_Model_OpenChrom
HumanMouseConsRegTFBS	Any	HOXA11	40	19461	0.00205539	42.8521	6.48831	-0.439583	0.933442	0.66988	1	Null_Model_OpenChrom
HumanMouseConsRegTFBS	Any	HOXA13	66	19461	0.0033914	75.05	8.98808	-1.00688	0.879414	0.843005	1	Null_Model_OpenChrom
HumanMouseConsRegTFBS	Any	HOXA1	46	19461	0.0023637	73.1818	8.89128	-3.05713	0.628571	0.998883	1	Null_Model_OpenChrom
HumanMouseConsRegTFBS	Any	HoxA2	170	19461	0.00873542	201.777	14.6308	-2.17195	0.842513	0.98507	1	Null_Model_OpenChrom
HumanMouseConsRegTFBS	Any	HOXA3	98	19461	0.00503571	145.091	12.352	-3.8124	0.675439	0.999931	1	Null_Model_OpenChrom
HumanMouseConsRegTFBS	Any	HOXA4	381	19461	0.0195776	439.864	22.2994	-2.63972	0.866177	0.995851	1	Null_Model_OpenChrom
HumanMouseConsRegTFBS	Any	HOXA5	188	19461	0.00966035	220.193	15.5933	-2.06453	0.853797	0.980516	1	Null_Model_OpenChrom
HumanMouseConsRegTFBS	Any	HOXA6	159	19461	0.00817019	197.779	13.8933	-2.79121	0.803927	0.997374	1	Null_Model_OpenChrom
HumanMouseConsRegTFBS	Any	HOXA7	473	19461	0.024305	532.329	25.9352	-2.28757	0.888549	0.988919	1	Null_Model_OpenChrom
HumanMouseConsRegTFBS	Any	hoxa9	519	19461	0.0266687	590.525	27.5421	-2.59695	0.878878	0.995297	1	Null_Model_OpenChrom
HumanMouseConsRegTFBS	Any	HOXB13	413	19461	0.0212219	471.042	23.3966	-2.48078	0.87678	0.993445	1	Null_Model_OpenChrom
HumanMouseConsRegTFBS	Any	HOXB3	318	19461	0.0163404	358.835	19.626	-2.08066	0.886201	0.981268	1	Null_Model_OpenChrom
HumanMouseConsRegTFBS	Any	HOXB4	142	19461	0.00729664	187.935	14.316	-3.20866	0.75558	0.999333	1	Null_Model_OpenChrom
HumanMouseConsRegTFBS	Any	HoxB5	207	19461	0.0106367	239.288	16.6103	-1.94383	0.865067	0.974042	1	Null_Model_OpenChrom
HumanMouseConsRegTFBS	Any	HOXB6	627	19461	0.0322183	674.584	29.5467	-1.61048	0.929461	0.946354	1	Null_Model_OpenChrom
HumanMouseConsRegTFBS	Any	HOXB7	262	19461	0.0134628	301.134	17.8694	-2.19	0.870045	0.985738	1	Null_Model_OpenChrom
HumanMouseConsRegTFBS	Any	HOXB8	393	19461	0.0201942	440.122	22.2693	-2.116	0.892934	0.982828	1	Null_Model_OpenChrom
HumanMouseConsRegTFBS	Any	HOXB9	315	19461	0.0161862	362.55	20.2811	-2.34457	0.868845	0.990476	1	Null_Model_OpenChrom
HumanMouseConsRegTFBS	Any	HOXC10	38	19461	0.00195262	40.8452	6.31007	-0.450891	0.930343	0.673966	1	Null_Model_OpenChrom
HumanMouseConsRegTFBS	Any	HOXC11	30	19461	0.00154154	33.1159	6.06701	-0.513579	0.90591	0.696227	1	Null_Model_OpenChrom
HumanMouseConsRegTFBS	Any	HOXC12	38	19461	0.00195262	43.6503	6.81305	-0.829342	0.870554	0.796545	1	Null_Model_OpenChrom
HumanMouseConsRegTFBS	Any	HOXC13	138	19461	0.00709111	156.864	12.6942	-1.48604	0.879742	0.931366	1	Null_Model_OpenChrom
HumanMouseConsRegTFBS	Any	HOXC4	90	19461	0.00462463	134.704	11.9215	-3.74988	0.66813	0.999912	1	Null_Model_OpenChrom
HumanMouseConsRegTFBS	Any	HOXC5	280	19461	0.0143877	324.497	19.4531	-2.28738	0.862875	0.988913	1	Null_Model_OpenChrom
HumanMouseConsRegTFBS	Any	HOXC6	378	19461	0.0194235	440.539	21.7691	-2.87286	0.858039	0.997966	1	Null_Model_OpenChrom
HumanMouseConsRegTFBS	Any	HOXC-8	221	19461	0.011356	255.543	15.6896	-2.20167	0.864824	0.986156	1	Null_Model_OpenChrom
HumanMouseConsRegTFBS	Any	HOXC9	418	19461	0.0214789	491.95	23.3185	-3.1713	0.84968	0.999241	1	Null_Model_OpenChrom
HumanMouseConsRegTFBS	Any	HOXD10	524	19461	0.0269256	594.786	27.2788	-2.59492	0.880989	0.995269	1	Null_Model_OpenChrom
HumanMouseConsRegTFBS	Any	HOXD11	25	19461	0.00128462	26.5325	5.21126	-0.294069	0.942242	0.615647	1	Null_Model_OpenChrom
HumanMouseConsRegTFBS	Any	HOXD12	19	19461	0.000976312	20.2178	4.51869	-0.269499	0.939767	0.606227	1	Null_Model_OpenChrom
HumanMouseConsRegTFBS	Any	HOXD13	226	19461	0.011613	267.927	17.176	-2.44103	0.843513	0.992677	1	Null_Model_OpenChrom
HumanMouseConsRegTFBS	Any	HOXD1	229	19461	0.0117671	268.637	17.6989	-2.23954	0.85245	0.98744	1	Null_Model_OpenChrom
HumanMouseConsRegTFBS	Any	HOXD3	364	19461	0.0187041	411.368	21.9043	-2.16248	0.884853	0.98471	1	Null_Model_OpenChrom
HumanMouseConsRegTFBS	Any	HOXD8	438	19461	0.0225066	508.358	24.759	-2.8417	0.861598	0.997756	1	Null_Model_OpenChrom
HumanMouseConsRegTFBS	Any	Hoxd9	107	19461	0.00549818	136.554	11.721	-2.5215	0.78357	0.994157	1	Null_Model_OpenChrom
HumanMouseConsRegTFBS	Any	HP1	70	19461	0.00359694	80.1658	8.95916	-1.13469	0.87319	0.871747	1	Null_Model_OpenChrom
HumanMouseConsRegTFBS	Any	HSF1	18	19461	0.000924927	13.8931	3.79204	1.08303	1.29561	0.139398	1	Null_Model_OpenChrom
HumanMouseConsRegTFBS	Any	HSF2	0	19461	0	0.264735	0.516571	-0.512486	0	0.695845	1	Null_Model_OpenChrom
HumanMouseConsRegTFBS	Any	HSF	1	19461	5.13848e-05	0.267732	0.544286	1.34537	3.73507	0.0892526	1	Null_Model_OpenChrom
HumanMouseConsRegTFBS	Any	HTF4	48	19461	0.00246647	69.7632	8.45014	-2.57549	0.688041	0.994995	1	Null_Model_OpenChrom
HumanMouseConsRegTFBS	Any	ICSBP	9	19461	0.000462463	11.3576	3.45427	-0.68253	0.792418	0.752548	1	Null_Model_OpenChrom
HumanMouseConsRegTFBS	Any	Ik-1	141	19461	0.00724526	130.757	11.4528	0.894347	1.07833	0.185568	1	Null_Model_OpenChrom
HumanMouseConsRegTFBS	Any	Ik-3	69	19461	0.00354555	55.3926	7.54922	1.80249	1.24565	0.0357342	1	Null_Model_OpenChrom
HumanMouseConsRegTFBS	Any	Ikaros	621	19461	0.03191	620.612	29.2217	0.0132645	1.00062	0.494708	1	Null_Model_OpenChrom
HumanMouseConsRegTFBS	Any	ipf1	342	19461	0.0175736	379.192	20.7485	-1.7925	0.901918	0.963474	1	Null_Model_OpenChrom
HumanMouseConsRegTFBS	Any	IRF-1	379	19461	0.0194748	428.856	24.4459	-2.03945	0.883746	0.979297	1	Null_Model_OpenChrom
HumanMouseConsRegTFBS	Any	IRF-2	1	19461	5.13848e-05	0.687313	0.795694	0.392974	1.45494	0.347169	1	Null_Model_OpenChrom
HumanMouseConsRegTFBS	Any	IRF-3	86	19461	0.00441909	99.0559	10.3225	-1.2648	0.868196	0.897028	1	Null_Model_OpenChrom
HumanMouseConsRegTFBS	Any	IRF-4	105	19461	0.00539541	100.192	9.75311	0.492991	1.04799	0.31101	1	Null_Model_OpenChrom
HumanMouseConsRegTFBS	Any	IRF-7	363	19461	0.0186527	417.383	21.5384	-2.52491	0.869706	0.994214	1	Null_Model_OpenChrom
HumanMouseConsRegTFBS	Any	IRF	196	19461	0.0100714	238.445	16.0107	-2.65102	0.821994	0.995988	1	Null_Model_OpenChrom
HumanMouseConsRegTFBS	Any	Irx2	72	19461	0.00369971	76.3926	8.74853	-0.502097	0.9425	0.6922	1	Null_Model_OpenChrom
HumanMouseConsRegTFBS	Any	Irx-3	120	19461	0.00616618	124.214	11.1821	-0.376832	0.966076	0.646851	1	Null_Model_OpenChrom
HumanMouseConsRegTFBS	Any	IRX4	413	19461	0.0212219	465.908	23.7668	-2.22613	0.886441	0.986997	1	Null_Model_OpenChrom
HumanMouseConsRegTFBS	Any	Irx5	138	19461	0.00709111	136.346	12.1915	0.135697	1.01213	0.446031	1	Null_Model_OpenChrom
HumanMouseConsRegTFBS	Any	IRXB3	148	19461	0.00760495	152.318	13.1196	-0.329101	0.971653	0.62896	1	Null_Model_OpenChrom
HumanMouseConsRegTFBS	Any	ISGF-3	5	19461	0.000256924	3.62038	1.86326	0.740433	1.38107	0.229519	1	Null_Model_OpenChrom
HumanMouseConsRegTFBS	Any	ISL1	37	19461	0.00190124	45.2488	6.65666	-1.23917	0.817702	0.892359	1	Null_Model_OpenChrom
HumanMouseConsRegTFBS	Any	Isl2	453	19461	0.0232773	515.896	24.6962	-2.5468	0.878084	0.994564	1	Null_Model_OpenChrom
HumanMouseConsRegTFBS	Any	isx	65	19461	0.00334001	85.973	9.91314	-2.11568	0.756051	0.982814	1	Null_Model_OpenChrom
HumanMouseConsRegTFBS	Any	K-2b	65	19461	0.00334001	91.7552	9.14325	-2.92623	0.708406	0.998285	1	Null_Model_OpenChrom
HumanMouseConsRegTFBS	Any	KAISO	3	19461	0.000154154	3.9001	1.95244	-0.461014	0.769211	0.677606	1	Null_Model_OpenChrom
HumanMouseConsRegTFBS	Any	KLF15	163	19461	0.00837573	188.567	13.595	-1.88065	0.864412	0.96999	1	Null_Model_OpenChrom
HumanMouseConsRegTFBS	Any	KROX	242	19461	0.0124351	245.932	16.963	-0.231803	0.984012	0.591654	1	Null_Model_OpenChrom
HumanMouseConsRegTFBS	Any	LBP-1	81	19461	0.00416217	95.959	9.56751	-1.56352	0.84411	0.941035	1	Null_Model_OpenChrom
HumanMouseConsRegTFBS	Any	LBP9	344	19461	0.0176764	336.779	20.2455	0.356661	1.02144	0.360673	1	Null_Model_OpenChrom
HumanMouseConsRegTFBS	Any	Lbx2	225	19461	0.0115616	276.04	17.1806	-2.97079	0.815099	0.998515	1	Null_Model_OpenChrom
HumanMouseConsRegTFBS	Any	LEF-1	181	19461	0.00930065	166.109	12.7236	1.17035	1.08965	0.12093	1	Null_Model_OpenChrom
HumanMouseConsRegTFBS	Any	LEF1	581	19461	0.0298546	633.626	28.1171	-1.87168	0.916944	0.969375	1	Null_Model_OpenChrom
HumanMouseConsRegTFBS	Any	LEF1,	189	19461	0.00971173	191.76	13.8687	-0.199027	0.985606	0.578879	1	Null_Model_OpenChrom
HumanMouseConsRegTFBS	Any	Lentiviral	10	19461	0.000513848	10.4446	3.32162	-0.133837	0.957437	0.553234	1	Null_Model_OpenChrom
HumanMouseConsRegTFBS	Any	LF-A1	139	19461	0.00714249	166.544	13.2317	-2.0817	0.834612	0.981315	1	Null_Model_OpenChrom
HumanMouseConsRegTFBS	Any	LH-2	312	19461	0.0160321	353.649	20.4265	-2.03898	0.88223	0.979274	1	Null_Model_OpenChrom
HumanMouseConsRegTFBS	Any	Lhx3a	42	19461	0.00215816	63.4326	8.21424	-2.6092	0.66212	0.995462	1	Null_Model_OpenChrom
HumanMouseConsRegTFBS	Any	LHX3b	67	19461	0.00344278	96.1738	9.92198	-2.94032	0.696655	0.998361	1	Null_Model_OpenChrom
HumanMouseConsRegTFBS	Any	Lhx3	34	19461	0.00174708	60.0599	7.59371	-3.43178	0.566101	0.9997	1	Null_Model_OpenChrom
HumanMouseConsRegTFBS	Any	Lhx4	274	19461	0.0140794	315.913	20.0182	-2.09375	0.867327	0.981859	1	Null_Model_OpenChrom
HumanMouseConsRegTFBS	Any	Lhx5	58	19461	0.00298032	82.5984	8.90228	-2.76316	0.702193	0.997138	1	Null_Model_OpenChrom
HumanMouseConsRegTFBS	Any	lhx6.1	347	19461	0.0178305	387.244	21.1552	-1.90231	0.896076	0.971434	1	Null_Model_OpenChrom
HumanMouseConsRegTFBS	Any	Lhx8	236	19461	0.0121268	271.549	17.1792	-2.06933	0.869087	0.980743	1	Null_Model_OpenChrom
HumanMouseConsRegTFBS	Any	Lhx9	287	19461	0.0147474	336.345	19.9597	-2.47221	0.853291	0.993286	1	Null_Model_OpenChrom
HumanMouseConsRegTFBS	Any	Lim-1	90	19461	0.00462463	133.047	12.2393	-3.51711	0.676453	0.999782	1	Null_Model_OpenChrom
HumanMouseConsRegTFBS	Any	LMAF	53	19461	0.0027234	65.6613	8.11605	-1.56004	0.807172	0.940625	1	Null_Model_OpenChrom
HumanMouseConsRegTFBS	Any	Lmo2	104	19461	0.00534402	132.637	12.2544	-2.33691	0.784093	0.990278	1	Null_Model_OpenChrom
HumanMouseConsRegTFBS	Any	lmx1b	62	19461	0.00318586	86.2627	9.26887	-2.61766	0.718734	0.995573	1	Null_Model_OpenChrom
HumanMouseConsRegTFBS	Any	Lmx-1	174	19461	0.00894096	220.769	15.4628	-3.02463	0.788153	0.998755	1	Null_Model_OpenChrom
HumanMouseConsRegTFBS	Any	LRH1	66	19461	0.0033914	78.4176	8.69433	-1.42824	0.841648	0.923388	1	Null_Model_OpenChrom
HumanMouseConsRegTFBS	Any	LXRalpha:RXRalpha	322	19461	0.0165459	313.325	18.7758	0.462049	1.02769	0.322023	1	Null_Model_OpenChrom
HumanMouseConsRegTFBS	Any	LXRbeta:RXRalpha	354	19461	0.0181902	344.393	20.6876	0.464402	1.0279	0.32118	1	Null_Model_OpenChrom
HumanMouseConsRegTFBS	Any	LXR	2	19461	0.00010277	0.986014	0.961147	1.05497	2.02837	0.145718	1	Null_Model_OpenChrom
HumanMouseConsRegTFBS	Any	LXR,	953	19461	0.0489697	1037.85	38.3018	-2.21538	0.918242	0.986633	1	Null_Model_OpenChrom
HumanMouseConsRegTFBS	Any	Lyf-1	899	19461	0.046195	994.429	36.4447	-2.61845	0.904037	0.995583	1	Null_Model_OpenChrom
HumanMouseConsRegTFBS	Any	MAF	4	19461	0.000205539	1.36464	1.20412	2.18862	2.93119	0.0143122	1	Null_Model_OpenChrom
HumanMouseConsRegTFBS	Any	MafK	26	19461	0.00133601	26.6284	5.15187	-0.12197	0.976402	0.548538	1	Null_Model_OpenChrom
HumanMouseConsRegTFBS	Any	MATH1	22	19461	0.00113047	45.6553	6.79353	-3.48204	0.481871	0.999751	1	Null_Model_OpenChrom
HumanMouseConsRegTFBS	Any	MAZ	494	19461	0.0253841	500.497	26.09	-0.249004	0.98702	0.598321	1	Null_Model_OpenChrom
HumanMouseConsRegTFBS	Any	MAZR	136	19461	0.00698834	148.551	11.8153	-1.0623	0.915508	0.855951	1	Null_Model_OpenChrom
HumanMouseConsRegTFBS	Any	MECP2	113	19461	0.00580648	86.5664	9.9114	2.66699	1.30536	0.00382674	1	Null_Model_OpenChrom
HumanMouseConsRegTFBS	Any	mef2A	268	19461	0.0137711	315.16	18.4814	-2.55175	0.850362	0.994641	1	Null_Model_OpenChrom
HumanMouseConsRegTFBS	Any	MEF-2D	56	19461	0.00287755	73.1968	8.24889	-2.08474	0.765061	0.981454	1	Null_Model_OpenChrom
HumanMouseConsRegTFBS	Any	MEF-2	381	19461	0.0195776	437.578	22.4096	-2.52475	0.870701	0.994211	1	Null_Model_OpenChrom
HumanMouseConsRegTFBS	Any	MEF-3	3	19461	0.000154154	1.33766	1.16442	1.42761	2.24272	0.0767018	1	Null_Model_OpenChrom
HumanMouseConsRegTFBS	Any	MEIS1A:HOXA9	18	19461	0.000924927	28.0659	5.42583	-1.85519	0.641347	0.968215	1	Null_Model_OpenChrom
HumanMouseConsRegTFBS	Any	MEIS1B:HOXA9	10	19461	0.000513848	12.8601	3.49005	-0.819514	0.777597	0.793753	1	Null_Model_OpenChrom
HumanMouseConsRegTFBS	Any	Meis1	14	19461	0.000719387	23.7023	4.823	-2.01167	0.59066	0.977873	1	Null_Model_OpenChrom
HumanMouseConsRegTFBS	Any	Meis2	48	19461	0.00246647	69.4246	8.27409	-2.58936	0.691398	0.995192	1	Null_Model_OpenChrom
HumanMouseConsRegTFBS	Any	MEQ:c-Jun	121	19461	0.00621756	106.073	10.1751	1.46701	1.14072	0.0711863	1	Null_Model_OpenChrom
HumanMouseConsRegTFBS	Any	MIF-1	0	19461	0	2.01199	1.45047	-1.38713	0	0.917299	1	Null_Model_OpenChrom
HumanMouseConsRegTFBS	Any	MIZF	1	19461	5.13848e-05	1.25974	1.09475	-0.237261	0.793814	0.593773	1	Null_Model_OpenChrom
HumanMouseConsRegTFBS	Any	Mox1	360	19461	0.0184985	410.639	21.9534	-2.30668	0.876682	0.989464	1	Null_Model_OpenChrom
HumanMouseConsRegTFBS	Any	MRF-2	335	19461	0.0172139	326.44	20.2529	0.422677	1.02622	0.336266	1	Null_Model_OpenChrom
HumanMouseConsRegTFBS	Any	MRG2	88	19461	0.00452186	109.664	10.2126	-2.12133	0.802449	0.983053	1	Null_Model_OpenChrom
HumanMouseConsRegTFBS	Any	Msx-1	56	19461	0.00287755	100.673	10.6729	-4.18569	0.556255	0.999986	1	Null_Model_OpenChrom
HumanMouseConsRegTFBS	Any	Msx-2	78	19461	0.00400802	95.5215	9.87086	-1.77507	0.81657	0.962057	1	Null_Model_OpenChrom
HumanMouseConsRegTFBS	Any	Msx-3	66	19461	0.0033914	85.5644	9.51263	-2.05668	0.771349	0.980142	1	Null_Model_OpenChrom
HumanMouseConsRegTFBS	Any	mTERF	3	19461	0.000154154	2.94805	1.76389	0.0294509	1.01762	0.488252	1	Null_Model_OpenChrom
HumanMouseConsRegTFBS	Any	MTF-1	16	19461	0.000822157	17.1009	4.15461	-0.264982	0.935623	0.604488	1	Null_Model_OpenChrom
HumanMouseConsRegTFBS	Any	Muscle	640	19461	0.0328863	720.607	28.863	-2.79276	0.88814	0.997387	1	Null_Model_OpenChrom
HumanMouseConsRegTFBS	Any	Myc	145	19461	0.0074508	123.05	11.2135	1.95747	1.17838	0.0251458	1	Null_Model_OpenChrom
HumanMouseConsRegTFBS	Any	MYF	32	19461	0.00164431	49.97	7.15396	-2.5119	0.640384	0.993996	1	Null_Model_OpenChrom
HumanMouseConsRegTFBS	Any	MyoD	134	19461	0.00688557	166.187	14.4663	-2.22495	0.806321	0.986958	1	Null_Model_OpenChrom
HumanMouseConsRegTFBS	Any	myogenin	93	19461	0.00477879	117.55	11.4046	-2.15267	0.79115	0.984328	1	Null_Model_OpenChrom
HumanMouseConsRegTFBS	Any	MZF1	116	19461	0.00596064	136.165	11.7409	-1.71748	0.851909	0.957054	1	Null_Model_OpenChrom
HumanMouseConsRegTFBS	Any	Nanog	660	19461	0.033914	735.916	30.8279	-2.46258	0.896841	0.993103	1	Null_Model_OpenChrom
HumanMouseConsRegTFBS	Any	Ncx	673	19461	0.034582	744.201	29.8462	-2.38559	0.904326	0.991474	1	Null_Model_OpenChrom
HumanMouseConsRegTFBS	Any	NERF1a	7	19461	0.000359694	3.00599	1.73665	2.29983	2.32868	0.0107289	1	Null_Model_OpenChrom
HumanMouseConsRegTFBS	Any	NeuroD	291	19461	0.014953	343.96	20.9386	-2.5293	0.846029	0.994286	1	Null_Model_OpenChrom
HumanMouseConsRegTFBS	Any	NF-AT2	583	19461	0.0299574	636.534	28.0042	-1.91166	0.915897	0.97204	1	Null_Model_OpenChrom
HumanMouseConsRegTFBS	Any	NFAT3	152	19461	0.00781049	143.522	12.2337	0.692964	1.05907	0.244166	1	Null_Model_OpenChrom
HumanMouseConsRegTFBS	Any	NF-AT	323	19461	0.0165973	349.024	20.9753	-1.2407	0.925438	0.892641	1	Null_Model_OpenChrom
HumanMouseConsRegTFBS	Any	NF-E2	342	19461	0.0175736	339.31	20.1237	0.133689	1.00793	0.446824	1	Null_Model_OpenChrom
HumanMouseConsRegTFBS	Any	NF-E4	257	19461	0.0132059	258.044	15.9883	-0.065295	0.995954	0.52603	1	Null_Model_OpenChrom
HumanMouseConsRegTFBS	Any	NF-kappaB	560	19461	0.0287755	600.838	27.126	-1.5055	0.932031	0.933902	1	Null_Model_OpenChrom
HumanMouseConsRegTFBS	Any	NF-muE1	16	19461	0.000822157	10.97	3.29167	1.52809	1.45852	0.0632451	1	Null_Model_OpenChrom
HumanMouseConsRegTFBS	Any	NF-Y	227	19461	0.0116644	209.618	16.637	1.04476	1.08292	0.148067	1	Null_Model_OpenChrom
HumanMouseConsRegTFBS	Any	NGFI-C	21	19461	0.00107908	23.2947	4.86786	-0.471399	0.901492	0.681322	1	Null_Model_OpenChrom
HumanMouseConsRegTFBS	Any	Nkx1-1	487	19461	0.0250244	521.158	24.0348	-1.42118	0.934458	0.922368	1	Null_Model_OpenChrom
HumanMouseConsRegTFBS	Any	Nkx1-2	394	19461	0.0202456	438.343	21.7864	-2.03534	0.89884	0.979092	1	Null_Model_OpenChrom
HumanMouseConsRegTFBS	Any	Nkx2-1	315	19461	0.0161862	362.466	20.1583	-2.35463	0.869048	0.99073	1	Null_Model_OpenChrom
HumanMouseConsRegTFBS	Any	Nkx2-2	23	19461	0.00118185	34.8342	5.75469	-2.05644	0.660271	0.98013	1	Null_Model_OpenChrom
HumanMouseConsRegTFBS	Any	Nkx2-3	443	19461	0.0227635	524.746	24.3732	-3.35394	0.844218	0.999602	1	Null_Model_OpenChrom
HumanMouseConsRegTFBS	Any	Nkx2-4	458	19461	0.0235342	521.144	24.9329	-2.53256	0.878836	0.994338	1	Null_Model_OpenChrom
HumanMouseConsRegTFBS	Any	Nkx2-5	67	19461	0.00344278	91.9211	9.53293	-2.61421	0.728886	0.995528	1	Null_Model_OpenChrom
HumanMouseConsRegTFBS	Any	NKX25	159	19461	0.00817019	170.779	12.657	-0.930647	0.931027	0.823982	1	Null_Model_OpenChrom
HumanMouseConsRegTFBS	Any	Nkx2-6	113	19461	0.00580648	135.891	11.3327	-2.01991	0.831548	0.978304	1	Null_Model_OpenChrom
HumanMouseConsRegTFBS	Any	Nkx2-9	520	19461	0.0267201	585.714	26.9036	-2.44258	0.887805	0.992709	1	Null_Model_OpenChrom
HumanMouseConsRegTFBS	Any	NKX2B	340	19461	0.0174708	386.738	20.8942	-2.2369	0.879148	0.987354	1	Null_Model_OpenChrom
HumanMouseConsRegTFBS	Any	Nkx3-1	241	19461	0.0123837	266.154	16.4519	-1.52893	0.905491	0.93686	1	Null_Model_OpenChrom
HumanMouseConsRegTFBS	Any	Nkx3-2	150	19461	0.00770772	211.09	15.1249	-4.03902	0.710598	0.999973	1	Null_Model_OpenChrom
HumanMouseConsRegTFBS	Any	Nkx3A	546	19461	0.0280561	607.115	29.0274	-2.10542	0.899336	0.982373	1	Null_Model_OpenChrom
HumanMouseConsRegTFBS	Any	Nkx5-1	301	19461	0.0154668	345.612	19.3754	-2.30252	0.870918	0.989347	1	Null_Model_OpenChrom
HumanMouseConsRegTFBS	Any	Nkx5-2	241	19461	0.0123837	278.742	17.6029	-2.14409	0.864598	0.983987	1	Null_Model_OpenChrom
HumanMouseConsRegTFBS	Any	Nkx6-1	35	19461	0.00179847	60.3227	8.02912	-3.15385	0.580213	0.999194	1	Null_Model_OpenChrom
HumanMouseConsRegTFBS	Any	NKX6.1	191	19461	0.0098145	241.53	16.0983	-3.13887	0.79079	0.999152	1	Null_Model_OpenChrom
HumanMouseConsRegTFBS	Any	Nkx6-2	181	19461	0.00930065	232.235	15.9573	-3.21075	0.779384	0.999338	1	Null_Model_OpenChrom
HumanMouseConsRegTFBS	Any	Nkx6-3	233	19461	0.0119727	278.755	17.494	-2.61548	0.835859	0.995545	1	Null_Model_OpenChrom
HumanMouseConsRegTFBS	Any	N-Myc	126	19461	0.00647449	114.506	10.8948	1.05496	1.10037	0.145723	1	Null_Model_OpenChrom
HumanMouseConsRegTFBS	Any	Nrf-2	142	19461	0.00729664	141.434	11.9799	0.047282	1.004	0.481144	1	Null_Model_OpenChrom
HumanMouseConsRegTFBS	Any	NRSE	1	19461	5.13848e-05	0.842158	0.893902	0.176577	1.18743	0.429921	1	Null_Model_OpenChrom
HumanMouseConsRegTFBS	Any	NRSF	26	19461	0.00133601	34.6833	6.0515	-1.4349	0.74964	0.924343	1	Null_Model_OpenChrom
HumanMouseConsRegTFBS	Any	NUR77	31	19461	0.00159293	30.1329	5.41603	0.160105	1.02878	0.436399	1	Null_Model_OpenChrom
HumanMouseConsRegTFBS	Any	NURR1	160	19461	0.00822157	151.324	11.8671	0.731127	1.05734	0.232351	1	Null_Model_OpenChrom
HumanMouseConsRegTFBS	Any	Obox1	60	19461	0.00308309	81.3966	8.93709	-2.39414	0.737131	0.99167	1	Null_Model_OpenChrom
HumanMouseConsRegTFBS	Any	Obox2	144	19461	0.00739941	161.422	12.4671	-1.39741	0.892074	0.918854	1	Null_Model_OpenChrom
HumanMouseConsRegTFBS	Any	Obox3	103	19461	0.00529264	117.889	10.4523	-1.42448	0.873702	0.922846	1	Null_Model_OpenChrom
HumanMouseConsRegTFBS	Any	Obox5	40	19461	0.00205539	53.7193	7.24404	-1.89387	0.744612	0.970879	1	Null_Model_OpenChrom
HumanMouseConsRegTFBS	Any	Obox6	36	19461	0.00184985	48.9311	7.05069	-1.83401	0.735729	0.966674	1	Null_Model_OpenChrom
HumanMouseConsRegTFBS	Any	OC-2	31	19461	0.00159293	25.1359	4.98413	1.17656	1.2333	0.119685	1	Null_Model_OpenChrom
HumanMouseConsRegTFBS	Any	OCA-B	97	19461	0.00498433	95.8861	9.75556	0.11418	1.01162	0.454548	1	Null_Model_OpenChrom
HumanMouseConsRegTFBS	Any	2014-10-01	835	19461	0.0429063	920.796	34.3193	-2.49994	0.906824	0.993789	1	Null_Model_OpenChrom
HumanMouseConsRegTFBS	Any	2014-10-02	109	19461	0.00560095	139.064	12.1831	-2.46768	0.783812	0.9932	1	Null_Model_OpenChrom
HumanMouseConsRegTFBS	Any	2014-10-04	577	19461	0.029649	652.515	29.06	-2.5986	0.88427	0.99532	1	Null_Model_OpenChrom
HumanMouseConsRegTFBS	Any	2014-10-06	308	19461	0.0158265	351.002	19.9146	-2.15932	0.877488	0.984587	1	Null_Model_OpenChrom
HumanMouseConsRegTFBS	Any	Octamer	255	19461	0.0131031	295.131	18.4504	-2.17507	0.864023	0.985187	1	Null_Model_OpenChrom
HumanMouseConsRegTFBS	Any	OCT-x	21	19461	0.00107908	29.1798	5.39237	-1.51693	0.719675	0.935357	1	Null_Model_OpenChrom
HumanMouseConsRegTFBS	Any	OG-2	412	19461	0.0211705	458.909	23.7948	-1.9714	0.897781	0.975661	1	Null_Model_OpenChrom
HumanMouseConsRegTFBS	Any	Osf2	54	19461	0.00277478	60.2817	7.65915	-0.820159	0.895794	0.793937	1	Null_Model_OpenChrom
HumanMouseConsRegTFBS	Any	OTP	28	19461	0.00143877	47.952	6.92602	-2.88074	0.583917	0.998016	1	Null_Model_OpenChrom
HumanMouseConsRegTFBS	Any	Otx1	93	19461	0.00477879	109.261	10.7197	-1.5169	0.851175	0.935354	1	Null_Model_OpenChrom
HumanMouseConsRegTFBS	Any	Otx2	115	19461	0.00590925	139.467	11.6732	-2.09596	0.824571	0.981957	1	Null_Model_OpenChrom
HumanMouseConsRegTFBS	Any	Otx3	84	19461	0.00431632	98.4715	9.96762	-1.45185	0.853038	0.926729	1	Null_Model_OpenChrom
HumanMouseConsRegTFBS	Any	P50:P50	214	19461	0.0109964	224.803	15.7639	-0.685313	0.951944	0.753427	1	Null_Model_OpenChrom
HumanMouseConsRegTFBS	Any	P50:RELA-P65	414	19461	0.0212733	411.436	21.9359	0.116906	1.00623	0.453467	1	Null_Model_OpenChrom
HumanMouseConsRegTFBS	Any	p53	569	19461	0.029238	556.272	29.1196	0.437103	1.02288	0.331018	1	Null_Model_OpenChrom
HumanMouseConsRegTFBS	Any	p63	7	19461	0.000359694	4.67832	2.2245	1.04368	1.49626	0.148316	1	Null_Model_OpenChrom
HumanMouseConsRegTFBS	Any	PARP	319	19461	0.0163918	363.52	20.4223	-2.17999	0.87753	0.985371	1	Null_Model_OpenChrom
HumanMouseConsRegTFBS	Any	Pax-3	704	19461	0.0361749	764.339	31.3316	-1.92581	0.921058	0.972936	1	Null_Model_OpenChrom
HumanMouseConsRegTFBS	Any	Pax-4	895	19461	0.0459894	985.868	36.9212	-2.46114	0.907829	0.993075	1	Null_Model_OpenChrom
HumanMouseConsRegTFBS	Any	pax6	402	19461	0.0206567	446.21	23.3281	-1.89513	0.900922	0.970962	1	Null_Model_OpenChrom
HumanMouseConsRegTFBS	Any	Pax-6	482	19461	0.0247675	539.309	24.811	-2.30981	0.893737	0.989551	1	Null_Model_OpenChrom
HumanMouseConsRegTFBS	Any	Pax	921	19461	0.0473254	1006.19	37.1526	-2.29292	0.915336	0.989074	1	Null_Model_OpenChrom
HumanMouseConsRegTFBS	Any	Pbx-1b	26	19461	0.00133601	15.1289	3.87148	2.808	1.71857	0.0024925	1	Null_Model_OpenChrom
HumanMouseConsRegTFBS	Any	Pbx1	728	19461	0.0374081	814.075	34.1767	-2.51852	0.894267	0.994108	1	Null_Model_OpenChrom
HumanMouseConsRegTFBS	Any	Pbx	414	19461	0.0212733	472.499	23.0738	-2.53527	0.876193	0.994382	1	Null_Model_OpenChrom
HumanMouseConsRegTFBS	Any	PDEF	223	19461	0.0114588	191.001	14.0596	2.27596	1.16753	0.0114242	1	Null_Model_OpenChrom
HumanMouseConsRegTFBS	Any	PEA3	155	19461	0.00796465	127.088	10.9584	2.5471	1.21963	0.00543115	1	Null_Model_OpenChrom
HumanMouseConsRegTFBS	Any	PEBP	76	19461	0.00390525	94.4675	9.91964	-1.86171	0.804509	0.968678	1	Null_Model_OpenChrom
HumanMouseConsRegTFBS	Any	Pet-1	265	19461	0.013617	228.267	15.4037	2.38471	1.16092	0.00854641	1	Null_Model_OpenChrom
HumanMouseConsRegTFBS	Any	Pit-1	637	19461	0.0327321	724.541	30.2941	-2.88972	0.879177	0.998072	1	Null_Model_OpenChrom
HumanMouseConsRegTFBS	Any	Pitx1	84	19461	0.00431632	107.503	9.70774	-2.42111	0.78137	0.992263	1	Null_Model_OpenChrom
HumanMouseConsRegTFBS	Any	Pitx2	174	19461	0.00894096	196.724	14.4888	-1.5684	0.884487	0.941606	1	Null_Model_OpenChrom
HumanMouseConsRegTFBS	Any	Pitx3	29	19461	0.00149016	37.4625	6.16805	-1.372	0.774107	0.914968	1	Null_Model_OpenChrom
HumanMouseConsRegTFBS	Any	PKNOX2	36	19461	0.00184985	49.4286	7.03286	-1.9094	0.728324	0.971895	1	Null_Model_OpenChrom
HumanMouseConsRegTFBS	Any	PLAG1	411	19461	0.0211192	433.255	23.5258	-0.945971	0.948634	0.827918	1	Null_Model_OpenChrom
HumanMouseConsRegTFBS	Any	PMX2A	86	19461	0.00441909	122.177	11.0339	-3.27869	0.703898	0.999479	1	Null_Model_OpenChrom
HumanMouseConsRegTFBS	Any	PMX2B	76	19461	0.00390525	106.783	9.97928	-3.08471	0.711722	0.998981	1	Null_Model_OpenChrom
HumanMouseConsRegTFBS	Any	PNR	5	19461	0.000256924	5.17682	2.17525	-0.0812888	0.965843	0.532394	1	Null_Model_OpenChrom
HumanMouseConsRegTFBS	Any	Poly	453	19461	0.0232773	516.873	24.1417	-2.64576	0.876424	0.995925	1	Null_Model_OpenChrom
HumanMouseConsRegTFBS	Any	POU1F1	127	19461	0.00652587	146.519	12.1035	-1.61272	0.866779	0.946597	1	Null_Model_OpenChrom
HumanMouseConsRegTFBS	Any	POU2F3	52	19461	0.00267201	58.7912	7.55549	-0.898845	0.884486	0.815632	1	Null_Model_OpenChrom
HumanMouseConsRegTFBS	Any	POU3F2	3	19461	0.000154154	3.13786	1.69793	-0.0811941	0.956065	0.532356	1	Null_Model_OpenChrom
HumanMouseConsRegTFBS	Any	POU6F1	87	19461	0.00447048	110.685	10.7098	-2.21155	0.786012	0.986501	1	Null_Model_OpenChrom
HumanMouseConsRegTFBS	Any	PPARA	153	19461	0.00786188	157.2	12.7577	-0.329196	0.973284	0.628996	1	Null_Model_OpenChrom
HumanMouseConsRegTFBS	Any	PPARalpha:RXRalpha	33	19461	0.0016957	27.98	5.16368	0.972171	1.17941	0.165483	1	Null_Model_OpenChrom
HumanMouseConsRegTFBS	Any	PPAR	981	19461	0.0504085	1069.97	37.8264	-2.35203	0.916849	0.990664	1	Null_Model_OpenChrom
HumanMouseConsRegTFBS	Any	PPAR,	993	19461	0.0510251	1090.4	37.6368	-2.58781	0.910678	0.995171	1	Null_Model_OpenChrom
HumanMouseConsRegTFBS	Any	PPARgamma:RXRalpha	0	19461	0	0.396603	0.61445	-0.645461	0	0.740686	1	Null_Model_OpenChrom
HumanMouseConsRegTFBS	Any	PREP1	38	19461	0.00195262	55.6384	7.55666	-2.33415	0.682982	0.990206	1	Null_Model_OpenChrom
HumanMouseConsRegTFBS	Any	Prop-1_2	13	19461	0.000668003	36.0519	6.01575	-3.83193	0.360591	0.999936	1	Null_Model_OpenChrom
HumanMouseConsRegTFBS	Any	Prop-1	57	19461	0.00292893	77.985	8.6177	-2.43511	0.73091	0.992556	1	Null_Model_OpenChrom
HumanMouseConsRegTFBS	Any	PSX1	388	19461	0.0199373	451.084	23.3201	-2.70513	0.86015	0.996586	1	Null_Model_OpenChrom
HumanMouseConsRegTFBS	Any	PTF1-beta	13	19461	0.000668003	13.5734	3.55512	-0.161296	0.957754	0.56407	1	Null_Model_OpenChrom
HumanMouseConsRegTFBS	Any	PU.1	376	19461	0.0193207	420.5	22.8125	-1.9507	0.894173	0.974454	1	Null_Model_OpenChrom
HumanMouseConsRegTFBS	Any	PXR	304	19461	0.015621	288.69	16.9069	0.905531	1.05303	0.182592	1	Null_Model_OpenChrom
HumanMouseConsRegTFBS	Any	rax	98	19461	0.00503571	137.17	12.515	-3.12983	0.714443	0.999125	1	Null_Model_OpenChrom
HumanMouseConsRegTFBS	Any	Rb:E2F-1:DP-1	17	19461	0.000873542	12.0929	3.57776	1.37155	1.40578	0.085101	1	Null_Model_OpenChrom
HumanMouseConsRegTFBS	Any	RBP-Jkappa	237	19461	0.0121782	229.774	15.6801	0.460825	1.03145	0.322462	1	Null_Model_OpenChrom
HumanMouseConsRegTFBS	Any	R	50	19461	0.00256924	61.7912	7.93356	-1.48624	0.809177	0.931393	1	Null_Model_OpenChrom
HumanMouseConsRegTFBS	Any	RelB:p52	411	19461	0.0211192	400.223	21.6966	0.496724	1.02693	0.309692	1	Null_Model_OpenChrom
HumanMouseConsRegTFBS	Any	Retroviral	3	19461	0.000154154	2.87512	1.72377	0.0724429	1.04343	0.471125	1	Null_Model_OpenChrom
HumanMouseConsRegTFBS	Any	REX1	580	19461	0.0298032	617.081	31.1705	-1.18962	0.939909	0.882901	1	Null_Model_OpenChrom
HumanMouseConsRegTFBS	Any	RFX1	664	19461	0.0341195	697.849	29.656	-1.14139	0.951495	0.873147	1	Null_Model_OpenChrom
HumanMouseConsRegTFBS	Any	Rhox11	388	19461	0.0199373	402.684	24.2004	-0.60678	0.963534	0.728002	1	Null_Model_OpenChrom
HumanMouseConsRegTFBS	Any	RNF96	554	19461	0.0284672	532.521	27.6369	0.777167	1.04033	0.21853	1	Null_Model_OpenChrom
HumanMouseConsRegTFBS	Any	RORalpha1	34	19461	0.00174708	24.9161	4.89479	1.85583	1.36458	0.0317386	1	Null_Model_OpenChrom
HumanMouseConsRegTFBS	Any	RORalpha2	0	19461	0	0.858142	0.947553	-0.90564	0	0.817437	1	Null_Model_OpenChrom
HumanMouseConsRegTFBS	Any	RORalpha	43	19461	0.00220955	40.1399	6.55366	0.436419	1.07125	0.331266	1	Null_Model_OpenChrom
HumanMouseConsRegTFBS	Any	RORBETA	8	19461	0.000411079	7.18182	2.64743	0.309047	1.11392	0.378643	1	Null_Model_OpenChrom
HumanMouseConsRegTFBS	Any	RP58	4	19461	0.000205539	7.19081	2.61774	-1.21892	0.556266	0.888562	1	Null_Model_OpenChrom
HumanMouseConsRegTFBS	Any	RPC155	268	19461	0.0137711	272.601	17.5082	-0.262814	0.98312	0.603653	1	Null_Model_OpenChrom
HumanMouseConsRegTFBS	Any	RREB-1	71	19461	0.00364832	90.6693	9.38369	-2.09612	0.783065	0.981964	1	Null_Model_OpenChrom
HumanMouseConsRegTFBS	Any	RSRFC4	9	19461	0.000462463	10.7153	3.25851	-0.526402	0.839922	0.700696	1	Null_Model_OpenChrom
HumanMouseConsRegTFBS	Any	RXR	80	19461	0.00411079	61.8272	7.7803	2.33575	1.29393	0.00975218	1	Null_Model_OpenChrom
HumanMouseConsRegTFBS	Any	RXR:LXR-beta	0	19461	0	0.045954	0.20949	-0.219361	0	0.586816	1	Null_Model_OpenChrom
HumanMouseConsRegTFBS	Any	S8	66	19461	0.0033914	102.324	10.3754	-3.50094	0.645012	0.999768	1	Null_Model_OpenChrom
HumanMouseConsRegTFBS	Any	SATB1_2	754	19461	0.0387442	819.406	33.0778	-1.97733	0.920179	0.975998	1	Null_Model_OpenChrom
HumanMouseConsRegTFBS	Any	SATB1	19	19461	0.000976312	25.0649	5.03952	-1.20347	0.758031	0.885604	1	Null_Model_OpenChrom
HumanMouseConsRegTFBS	Any	SEF-1	0	19461	0	0.0699301	0.259046	-0.269952	0	0.606401	1	Null_Model_OpenChrom
HumanMouseConsRegTFBS	Any	SF1	441	19461	0.0226607	492.961	23.5482	-2.20658	0.894594	0.986328	1	Null_Model_OpenChrom
HumanMouseConsRegTFBS	Any	Shox2	85	19461	0.00436771	111.857	10.5623	-2.54273	0.759898	0.994501	1	Null_Model_OpenChrom
HumanMouseConsRegTFBS	Any	Six-1	81	19461	0.00416217	89.2507	9.71113	-0.849618	0.907555	0.802231	1	Null_Model_OpenChrom
HumanMouseConsRegTFBS	Any	Six-2	62	19461	0.00318586	67.7562	8.14521	-0.706703	0.915045	0.760124	1	Null_Model_OpenChrom
HumanMouseConsRegTFBS	Any	Six-3	53	19461	0.0027234	62.5924	7.75653	-1.23669	0.846748	0.891899	1	Null_Model_OpenChrom
HumanMouseConsRegTFBS	Any	six4	74	19461	0.00380248	87.1309	9.83127	-1.33562	0.849297	0.909164	1	Null_Model_OpenChrom
HumanMouseConsRegTFBS	Any	Six-6	84	19461	0.00431632	94.4885	9.51641	-1.10215	0.888997	0.864802	1	Null_Model_OpenChrom
HumanMouseConsRegTFBS	Any	SMAD3	129	19461	0.00662864	145.591	12.3123	-1.34754	0.886041	0.911097	1	Null_Model_OpenChrom
HumanMouseConsRegTFBS	Any	SMAD4	327	19461	0.0168028	339.944	18.8755	-0.685761	0.961923	0.753568	1	Null_Model_OpenChrom
HumanMouseConsRegTFBS	Any	SOX17	28	19461	0.00143877	28.1778	5.30494	-0.0335201	0.993689	0.51337	1	Null_Model_OpenChrom
HumanMouseConsRegTFBS	Any	SOX2	58	19461	0.00298032	60.2707	7.79331	-0.291369	0.962325	0.614616	1	Null_Model_OpenChrom
HumanMouseConsRegTFBS	Any	SOX4	289	19461	0.0148502	276.306	16.7615	0.757351	1.04594	0.22442	1	Null_Model_OpenChrom
HumanMouseConsRegTFBS	Any	SOX5	161	19461	0.00827296	152.019	12.2344	0.734079	1.05908	0.23145	1	Null_Model_OpenChrom
HumanMouseConsRegTFBS	Any	SOX9	586	19461	0.0301115	604.83	27.2082	-0.692077	0.968867	0.755556	1	Null_Model_OpenChrom
HumanMouseConsRegTFBS	Any	SOX	37	19461	0.00190124	40.007	6.29833	-0.477427	0.924838	0.683471	1	Null_Model_OpenChrom
HumanMouseConsRegTFBS	Any	Sp1	620	19461	0.0318586	604.982	29.6521	0.506472	1.02482	0.306263	1	Null_Model_OpenChrom
HumanMouseConsRegTFBS	Any	SP1:SP3	131	19461	0.00673141	140.967	11.8082	-0.844076	0.929295	0.800687	1	Null_Model_OpenChrom
HumanMouseConsRegTFBS	Any	SP2	152	19461	0.00781049	125.172	11.2006	2.39525	1.21433	0.00830444	1	Null_Model_OpenChrom
HumanMouseConsRegTFBS	Any	Sp3	134	19461	0.00688557	152.157	12.5462	-1.4472	0.88067	0.92608	1	Null_Model_OpenChrom
HumanMouseConsRegTFBS	Any	SP4	125	19461	0.0064231	117.743	10.7156	0.677216	1.06163	0.249134	1	Null_Model_OpenChrom
HumanMouseConsRegTFBS	Any	SPI1	131	19461	0.00673141	113.832	10.7706	1.59395	1.15082	0.0554732	1	Null_Model_OpenChrom
HumanMouseConsRegTFBS	Any	SPI-B	65	19461	0.00334001	56.8132	7.58525	1.07931	1.1441	0.140226	1	Null_Model_OpenChrom
HumanMouseConsRegTFBS	Any	SREBP-1	58	19461	0.00298032	44.8861	6.54989	2.00215	1.29216	0.0226341	1	Null_Model_OpenChrom
HumanMouseConsRegTFBS	Any	SREBP	29	19461	0.00149016	33.4186	5.57312	-0.792839	0.867781	0.786064	1	Null_Model_OpenChrom
HumanMouseConsRegTFBS	Any	SRF	453	19461	0.0232773	476.417	23.6015	-0.992165	0.950849	0.839441	1	Null_Model_OpenChrom
HumanMouseConsRegTFBS	Any	Staf	149	19461	0.00765634	147.007	12.2143	0.16317	1.01356	0.435192	1	Null_Model_OpenChrom
HumanMouseConsRegTFBS	Any	STAT1	433	19461	0.0222496	477.602	23.3864	-1.90719	0.906612	0.971752	1	Null_Model_OpenChrom
HumanMouseConsRegTFBS	Any	STAT1:STAT1	45	19461	0.00231232	38.3906	6.21243	1.0639	1.17216	0.143687	1	Null_Model_OpenChrom
HumanMouseConsRegTFBS	Any	STAT3	528	19461	0.0271312	552.397	25.0888	-0.972409	0.955835	0.834576	1	Null_Model_OpenChrom
HumanMouseConsRegTFBS	Any	STAT3:STAT3	4	19461	0.000205539	3.15285	1.7354	0.48816	1.26869	0.312718	1	Null_Model_OpenChrom
HumanMouseConsRegTFBS	Any	STAT4	217	19461	0.0111505	246.654	16.7954	-1.76563	0.879774	0.961271	1	Null_Model_OpenChrom
HumanMouseConsRegTFBS	Any	STAT5A	139	19461	0.00714249	133.418	12.2428	0.455977	1.04184	0.324203	1	Null_Model_OpenChrom
HumanMouseConsRegTFBS	Any	STAT	441	19461	0.0226607	464.976	23.799	-1.00744	0.948436	0.843138	1	Null_Model_OpenChrom
HumanMouseConsRegTFBS	Any	STATx	155	19461	0.00796465	137.541	12.2239	1.42824	1.12693	0.076612	1	Null_Model_OpenChrom
HumanMouseConsRegTFBS	Any	SZF1-1	233	19461	0.0119727	270.803	18.3095	-2.06468	0.860403	0.980523	1	Null_Model_OpenChrom
HumanMouseConsRegTFBS	Any	Tal-1alpha:E47	26	19461	0.00133601	37.3077	6.23227	-1.81438	0.696907	0.96519	1	Null_Model_OpenChrom
HumanMouseConsRegTFBS	Any	Tal-1beta:E47	11	19461	0.000565233	20.8052	4.59075	-2.13586	0.528714	0.983654	1	Null_Model_OpenChrom
HumanMouseConsRegTFBS	Any	Tal-1beta:ITF-2	7	19461	0.000359694	18.2208	4.25302	-2.63831	0.384177	0.995834	1	Null_Model_OpenChrom
HumanMouseConsRegTFBS	Any	Tal-1	696	19461	0.0357638	778.594	31.9848	-2.5823	0.893919	0.995093	1	Null_Model_OpenChrom
HumanMouseConsRegTFBS	Any	TAL1	18	19461	0.000924927	19.2228	4.34273	-0.281569	0.936389	0.610863	1	Null_Model_OpenChrom
HumanMouseConsRegTFBS	Any	TATA	545	19461	0.0280047	607.299	25.2858	-2.46378	0.897417	0.993126	1	Null_Model_OpenChrom
HumanMouseConsRegTFBS	Any	TBR2	683	19461	0.0350958	768.399	30.8961	-2.76405	0.888862	0.997146	1	Null_Model_OpenChrom
HumanMouseConsRegTFBS	Any	TBX5	344	19461	0.0176764	373.265	21.6694	-1.35051	0.921598	0.911574	1	Null_Model_OpenChrom
HumanMouseConsRegTFBS	Any	TCF-3	701	19461	0.0360208	766.321	31.1247	-2.09868	0.914761	0.982077	1	Null_Model_OpenChrom
HumanMouseConsRegTFBS	Any	TCF-4	132	19461	0.0067828	138.446	11.9619	-0.53884	0.953443	0.705001	1	Null_Model_OpenChrom
HumanMouseConsRegTFBS	Any	TEF-1	66	19461	0.0033914	70.5624	8.34652	-0.546628	0.935342	0.707683	1	Null_Model_OpenChrom
HumanMouseConsRegTFBS	Any	TEF	85	19461	0.00436771	102.907	10.3344	-1.73276	0.825988	0.958431	1	Null_Model_OpenChrom
HumanMouseConsRegTFBS	Any	Tel-2	4	19461	0.000205539	2.73027	1.6496	0.769721	1.46506	0.220733	1	Null_Model_OpenChrom
HumanMouseConsRegTFBS	Any	TFEB	113	19461	0.00580648	88.3926	9.28282	2.65085	1.27839	0.00401443	1	Null_Model_OpenChrom
HumanMouseConsRegTFBS	Any	TFE	96	19461	0.00493294	88.0769	9.94701	0.796528	1.08996	0.212863	1	Null_Model_OpenChrom
HumanMouseConsRegTFBS	Any	TFIIA	165	19461	0.0084785	185.566	13.354	-1.54009	0.889169	0.938231	1	Null_Model_OpenChrom
HumanMouseConsRegTFBS	Any	TFII-I	117	19461	0.00601202	117.459	10.9483	-0.0418826	0.996096	0.516704	1	Null_Model_OpenChrom
HumanMouseConsRegTFBS	Any	TGIF1	24	19461	0.00123324	35.6084	5.68194	-2.04303	0.673998	0.979475	1	Null_Model_OpenChrom
HumanMouseConsRegTFBS	Any	TGIF2	27	19461	0.00138739	44.7453	7.06315	-2.51237	0.603416	0.994004	1	Null_Model_OpenChrom
HumanMouseConsRegTFBS	Any	TGIF	37	19461	0.00190124	53.3387	7.443	-2.19517	0.693681	0.985924	1	Null_Model_OpenChrom
HumanMouseConsRegTFBS	Any	TR4	145	19461	0.0074508	132.282	11.5695	1.0993	1.09615	0.135819	1	Null_Model_OpenChrom
HumanMouseConsRegTFBS	Any	Tst-1	675	19461	0.0346848	713.569	28.7628	-1.34095	0.945949	0.910032	1	Null_Model_OpenChrom
HumanMouseConsRegTFBS	Any	TTF1	85	19461	0.00436771	95.1299	9.30511	-1.08863	0.893515	0.861843	1	Null_Model_OpenChrom
HumanMouseConsRegTFBS	Any	UF1H3BETA	6	19461	0.000308309	9.72927	3.09413	-1.20527	0.616696	0.885951	1	Null_Model_OpenChrom
HumanMouseConsRegTFBS	Any	Uncx-4.1	61	19461	0.00313447	89.1189	9.57418	-2.93695	0.684479	0.998343	1	Null_Model_OpenChrom
HumanMouseConsRegTFBS	Any	USF	266	19461	0.0136684	243.49	17.3336	1.29866	1.09245	0.0970301	1	Null_Model_OpenChrom
HumanMouseConsRegTFBS	Any	Vax-1	392	19461	0.0201428	449.479	22.9722	-2.50209	0.872122	0.993827	1	Null_Model_OpenChrom
HumanMouseConsRegTFBS	Any	Vax-2	100	19461	0.00513848	145.862	12.1946	-3.76085	0.685579	0.999915	1	Null_Model_OpenChrom
HumanMouseConsRegTFBS	Any	VBP	73	19461	0.00375109	69.5255	8.21289	0.423057	1.04997	0.336127	1	Null_Model_OpenChrom
HumanMouseConsRegTFBS	Any	VDR	815	19461	0.0418786	913.298	34.8658	-2.81932	0.892371	0.997594	1	Null_Model_OpenChrom
HumanMouseConsRegTFBS	Any	VDR,	181	19461	0.00930065	190.549	13.896	-0.68721	0.949885	0.754025	1	Null_Model_OpenChrom
HumanMouseConsRegTFBS	Any	VDR:RXR	3	19461	0.000154154	3.11089	1.74948	-0.0633839	0.964355	0.52527	1	Null_Model_OpenChrom
HumanMouseConsRegTFBS	Any	v-ErbA	6	19461	0.000308309	5.25175	2.31529	0.323179	1.14248	0.37328	1	Null_Model_OpenChrom
HumanMouseConsRegTFBS	Any	v-Jun	1	19461	5.13848e-05	0.334665	0.590667	1.12641	2.98806	0.129995	1	Null_Model_OpenChrom
HumanMouseConsRegTFBS	Any	v-Maf	559	19461	0.0287241	645.546	31.2835	-2.76652	0.865933	0.997167	1	Null_Model_OpenChrom
HumanMouseConsRegTFBS	Any	v-Myb	9	19461	0.000462463	10.8352	3.3172	-0.553227	0.830629	0.709946	1	Null_Model_OpenChrom
HumanMouseConsRegTFBS	Any	Vsx1	83	19461	0.00426494	112.334	10.5551	-2.77909	0.73887	0.997274	1	Null_Model_OpenChrom
HumanMouseConsRegTFBS	Any	WT1	202	19461	0.0103797	195.836	14.2161	0.433582	1.03147	0.332296	1	Null_Model_OpenChrom
HumanMouseConsRegTFBS	Any	XFD-1	30	19461	0.00154154	27.1469	5.38381	0.529949	1.1051	0.298074	1	Null_Model_OpenChrom
HumanMouseConsRegTFBS	Any	XFD-2	12	19461	0.000616618	20.8022	4.64939	-1.89319	0.576862	0.970834	1	Null_Model_OpenChrom
HumanMouseConsRegTFBS	Any	XFD-3	20	19461	0.0010277	10.2118	3.35099	2.921	1.95852	0.00174458	1	Null_Model_OpenChrom
HumanMouseConsRegTFBS	Any	XPF-1	248	19461	0.0127434	237.184	16.6264	0.650544	1.0456	0.25767	1	Null_Model_OpenChrom
HumanMouseConsRegTFBS	Any	Xvent-1	638	19461	0.0327835	696.087	29.5063	-1.96863	0.916552	0.975502	1	Null_Model_OpenChrom
HumanMouseConsRegTFBS	Any	YY1	47	19461	0.00241509	53.6424	7.26498	-0.914298	0.876173	0.81972	1	Null_Model_OpenChrom
HumanMouseConsRegTFBS	Any	ZBED6	504	19461	0.0258979	509.824	24.8395	-0.234473	0.988576	0.592691	1	Null_Model_OpenChrom
HumanMouseConsRegTFBS	Any	ZBP89	139	19461	0.00714249	135.281	11.6647	0.318851	1.02749	0.37492	1	Null_Model_OpenChrom
HumanMouseConsRegTFBS	Any	ZBRK1	0	19461	0	0.763237	0.858421	-0.889117	0	0.81303	1	Null_Model_OpenChrom
HumanMouseConsRegTFBS	Any	Zec	10	19461	0.000513848	4.98202	2.17156	2.31077	2.00722	0.0104227	1	Null_Model_OpenChrom
HumanMouseConsRegTFBS	Any	Zfp206	132	19461	0.0067828	101.126	10.0313	3.07779	1.3053	0.0010427	1	Null_Model_OpenChrom
HumanMouseConsRegTFBS	Any	Zfp281	213	19461	0.010945	218.869	15.196	-0.386229	0.973184	0.650337	1	Null_Model_OpenChrom
HumanMouseConsRegTFBS	Any	Zfx	257	19461	0.0132059	260.618	17.1397	-0.211112	0.986116	0.5836	1	Null_Model_OpenChrom
HumanMouseConsRegTFBS	Any	ZID	136	19461	0.00698834	162.888	13.1792	-2.04019	0.834929	0.979334	1	Null_Model_OpenChrom
HumanMouseConsRegTFBS	Any	ZNF219	27	19461	0.00138739	49.5924	6.99355	-3.23046	0.544438	0.999382	1	Null_Model_OpenChrom
HumanMouseConsRegTFBS	Any	ZNF333	41	19461	0.00210678	51.3427	7.45838	-1.38672	0.798556	0.917236	1	Null_Model_OpenChrom
HumanMouseConsRegTFBS	Any	ZNF515	358	19461	0.0183958	361.052	21.0321	-0.145109	0.991547	0.557687	1	Null_Model_OpenChrom
HumanMouseConsRegTFBS	Any	Zta	41	19461	0.00210678	38.5864	6.02153	0.400826	1.06255	0.344274	1	Null_Model_OpenChrom
JARID1A_Broad	H1-hESC	none	3981	19461	0.204563	4818.5	277.547	-3.01751	0.826191	0.998726	1	Null_Model_OpenChrom
JMJD2A_Broad	H1-hESC	none	2208	19461	0.113458	3109.47	171.962	-5.24227	0.710088	1	1	Null_Model_OpenChrom
Misc_ChIP	Akata	BZLF1	76	19461	0.00390525	101.093	10.0059	-2.50781	0.751784	0.993926	1	Null_Model_OpenChrom
Misc_ChIP	Akata	none	76	19461	0.00390525	101.009	9.99104	-2.50314	0.752408	0.993845	1	Null_Model_OpenChrom
Misc_ChIP	BCBL1	LANA	3	19461	0.000154154	0.733267	0.842486	2.69053	4.09128	0.00356693	1	Null_Model_OpenChrom
Misc_ChIP	BCBL1	none	3	19461	0.000154154	0.773227	0.877224	2.53843	3.87984	0.00556754	1	Null_Model_OpenChrom
Misc_ChIP	Jurkat	none	24	19461	0.00123324	19.8032	4.51555	0.92941	1.21193	0.176338	1	Null_Model_OpenChrom
Misc_ChIP	Jurkat	TAT	24	19461	0.00123324	19.7662	4.34825	0.973671	1.21419	0.16511	1	Null_Model_OpenChrom
Misc_ChIP	MutuIII	EBNA2	642	19461	0.0329891	705.765	30.6233	-2.08224	0.909651	0.98134	1	Null_Model_OpenChrom
Misc_ChIP	MutuIII	EBNA3C	108	19461	0.00554956	122.647	10.9478	-1.33793	0.880573	0.90954	1	Null_Model_OpenChrom
Misc_ChIP	MutuIII	none	686	19461	0.03525	747.469	29.5216	-2.08216	0.917764	0.981336	1	Null_Model_OpenChrom
Misc_ChIP	PBMC	IRF5	218	19461	0.0112019	228.604	15.67	-0.676734	0.953612	0.750713	1	Null_Model_OpenChrom
Misc_ChIP	PBMC	none	444	19461	0.0228149	466.466	25.4649	-0.882214	0.951839	0.81117	1	Null_Model_OpenChrom
Misc_ChIP	PBMC	STAT4	308	19461	0.0158265	305.365	18.1553	0.145157	1.00863	0.442294	1	Null_Model_OpenChrom
Misc_ChIP	Raji	EBNA1	7	19461	0.000359694	4.39461	1.98573	1.31206	1.59286	0.0947503	1	Null_Model_OpenChrom
Misc_ChIP	Raji	none	7	19461	0.000359694	4.4016	2.10251	1.23586	1.59033	0.108256	1	Null_Model_OpenChrom
NCoR_Broad	K562	none	5475	19461	0.281332	5453.92	67.3775	0.312848	1.00386	0.377198	1	Null_Model_OpenChrom
NSD2_Broad	K562	none	7410	19461	0.380762	7752.15	68.9597	-4.96153	0.955864	1	1	Null_Model_OpenChrom
ORegAnno	Any	none	459	19461	0.0235856	432.392	22.4029	1.18772	1.06154	0.117472	1	Null_Model_OpenChrom
P300_Broad	K562	none	8611	19461	0.442475	9235.27	529.903	-1.17809	0.932403	0.880619	1	Null_Model_OpenChrom
P300_KAT3B_Broad	H1-hESC	none	6150	19461	0.316017	8445.38	470.883	-4.87464	0.728208	0.999999	1	Null_Model_OpenChrom
P300_KAT3B_Broad	Osteoblasts	none	5327	19461	0.273727	6106.98	93.027	-8.38448	0.87228	1	1	Null_Model_OpenChrom
Pazar_Chip	BJ_GSE26005_p0001	none	3	19461	0.000154154	0.667333	0.823542	2.83248	4.49551	0.00230942	1	Null_Model_OpenChrom
Pazar_Chip	BJ_GSE26005_p0001	TERF2	3	19461	0.000154154	0.622378	0.808244	2.94171	4.82022	0.00163201	1	Null_Model_OpenChrom
Pazar_Chip	BJ_GSE26005_p001	none	4	19461	0.000205539	1.12188	1.05505	2.72795	3.56545	0.00318648	1	Null_Model_OpenChrom
Pazar_Chip	BJ_GSE26005_p001	TERF1	4	19461	0.000205539	0.948052	0.988584	3.08719	4.21918	0.00101029	1	Null_Model_OpenChrom
Pazar_Chip	BJ_GSE26005_p001	TERF2	3	19461	0.000154154	0.721279	0.862112	2.64319	4.15928	0.0041065	1	Null_Model_OpenChrom
Pazar_Chip	CD34_GSE29194_BIO	GATA1	184	19461	0.00945481	166.401	12.7895	1.37608	1.10577	0.0843988	1	Null_Model_OpenChrom
Pazar_Chip	CD34_GSE29194_BIO	none	184	19461	0.00945481	167.054	12.9823	1.30532	1.10144	0.0958913	1	Null_Model_OpenChrom
Pazar_Chip	CD34_GSE29194_eryth	GATA1	169	19461	0.00868403	162.257	12.6035	0.535029	1.04156	0.296315	1	Null_Model_OpenChrom
Pazar_Chip	CD34_GSE29194_eryth	none	181	19461	0.00930065	173.911	13.1815	0.537794	1.04076	0.29536	1	Null_Model_OpenChrom
Pazar_Chip	CD34_GSE29194_eryth	SMAD1	45	19461	0.00231232	38.9361	6.45677	0.939159	1.15574	0.173825	1	Null_Model_OpenChrom
Pazar_Chip	CD4+_GSE25674	HMGN1	2029	19461	0.10426	1897.72	99.8722	1.31445	1.06918	0.0943478	1	Null_Model_OpenChrom
Pazar_Chip	CD4+_GSE25674	none	2029	19461	0.10426	1900.12	99.1111	1.30036	1.06783	0.0967387	1	Null_Model_OpenChrom
Pazar_Chip	endoderm_GSE29422	FOXH1	360	19461	0.0184985	301.102	17.731	3.32175	1.19561	0.000447271	1	Null_Model_OpenChrom
Pazar_Chip	endoderm_GSE29422	SMAD2-3	43	19461	0.00220955	33.0869	5.90588	1.67851	1.29961	0.0466237	1	Null_Model_OpenChrom
Pazar_Chip	endoderm_GSE29422	SMAD3	34	19461	0.00174708	26.016	5.19016	1.5383	1.30689	0.0619878	1	Null_Model_OpenChrom
Pazar_Chip	endoderm_GSE29422	SMAD4	61	19461	0.00313447	51.6494	7.28258	1.28398	1.18104	0.0995753	1	Null_Model_OpenChrom
Pazar_Chip	erythroid_GSE25000	none	112	19461	0.0057551	84.1828	9.28437	2.99613	1.33044	0.00136715	1	Null_Model_OpenChrom
Pazar_Chip	erythroid_GSE25000	TAL1	112	19461	0.0057551	84.1638	9.20115	3.02529	1.33074	0.00124196	1	Null_Model_OpenChrom
Pazar_Chip	H1_GSE17917	KLF4	59	19461	0.0030317	66.8911	8.24931	-0.956578	0.882031	0.83061	1	Null_Model_OpenChrom
Pazar_Chip	H1_GSE17917	2014-10-04	99	19461	0.0050871	100.694	10.6198	-0.159542	0.983174	0.563379	1	Null_Model_OpenChrom
Pazar_Chip	H1_GSE18292	none	271	19461	0.0139253	333.278	18.5051	-3.36544	0.813136	0.999618	1	Null_Model_OpenChrom
Pazar_Chip	H1_GSE18292	SOX2	55	19461	0.00282617	80.9341	8.80714	-2.94467	0.679566	0.998383	1	Null_Model_OpenChrom
Pazar_Chip	HCT116_GSE34791	none	854	19461	0.0438826	1199	42.9211	-8.03807	0.712258	1	1	Null_Model_OpenChrom
Pazar_Chip	heart_GSE21356	NFKB1_p53	95	19461	0.00488156	95.2637	9.87534	-0.0267065	0.997232	0.510653	1	Null_Model_OpenChrom
Pazar_Chip	heart_GSE21356	none	95	19461	0.00488156	95.4955	10.0692	-0.0492101	0.994811	0.519624	1	Null_Model_OpenChrom
Pazar_Chip	HEK293T_GSE28051	none	4	19461	0.000205539	1.62937	1.26629	1.8721	2.45494	0.0305962	1	Null_Model_OpenChrom
Pazar_Chip	HeLa_GSE22478_G1S	none	663	19461	0.0340681	562.571	37.6592	2.66677	1.17852	0.00382916	1	Null_Model_OpenChrom
Pazar_Chip	HeLa_GSE22478_G1S	PHF8	663	19461	0.0340681	563.919	37.5608	2.63788	1.1757	0.00417128	1	Null_Model_OpenChrom
Pazar_Chip	HeLa_GSE22478	none	1079	19461	0.0554442	1093.74	38.3146	-0.384821	0.986519	0.649815	1	Null_Model_OpenChrom
Pazar_Chip	HeLa_GSE22478	SMC4	365	19461	0.0187555	507.022	24.4879	-5.79967	0.71989	1	1	Null_Model_OpenChrom
Pazar_Chip	Hela_GSE24126	none	502	19461	0.0257952	429.433	24.5908	2.951	1.16898	0.00158374	1	Null_Model_OpenChrom
Pazar_Chip	Hela_GSE24126	P68	502	19461	0.0257952	430.713	24.2512	2.93951	1.16551	0.00164367	1	Null_Model_OpenChrom
Pazar_Chip	HepG2_GSE25021	CTCF	956	19461	0.0491239	837.03	47.4603	2.50673	1.14213	0.00609274	1	Null_Model_OpenChrom
Pazar_Chip	hESC_GSE20650	CTCF	966	19461	0.0496377	937.947	32.1106	0.873636	1.02991	0.191158	1	Null_Model_OpenChrom
Pazar_Chip	hESC_GSE20650	none	1889	19461	0.0970659	1779.1	45.3979	2.42086	1.06177	0.00774187	1	Null_Model_OpenChrom
Pazar_Chip	hESC_GSE26097	EOMES	1138	19461	0.0584759	1116.24	44.9178	0.484513	1.0195	0.314011	1	Null_Model_OpenChrom
Pazar_Chip	hESC_GSE26097	none	1138	19461	0.0584759	1117.91	46.6188	0.430961	1.01797	0.333248	1	Null_Model_OpenChrom
Pazar_Chip	hESC_GSE29422	FOXH1	143	19461	0.00734803	135.246	11.8239	0.655809	1.05733	0.255974	1	Null_Model_OpenChrom
Pazar_Chip	hESC_GSE29422	none	459	19461	0.0235856	375.338	27.5259	3.03941	1.2229	0.00118522	1	Null_Model_OpenChrom
Pazar_Chip	hESC_GSE29422	SMAD3	67	19461	0.00344278	45.5984	6.61472	3.23545	1.46935	0.000607258	1	Null_Model_OpenChrom
Pazar_Chip	HSPC_GSE26014	none	21	19461	0.00107908	25.1179	5.15695	-0.798512	0.836058	0.787713	1	Null_Model_OpenChrom
[truncated: 435 more rows]

## Sheet: singleton_CEBPA_vs_ENCODE
Track	CellLine	TranscriptionFactor	Overlap	TotalHits	Ratio	Mean	SD	Zscore	Enrichment	p-value	Corrected p-value	Null Model
[truncated: 1,377 more rows]

[truncated: 3 more sheets: singleton_HNF4A_vs_ENCODE, singleton_FOXA1_vs_ENCODE, singleton_ONECUT1_vs_ENCODE]
