# Supplementary material for: Multi-species, multi-transcription factor binding highlights conserved control of tissue-specific biological pathways
Source: eLife. 2014 Oct 3;3:e02626. doi: 10.7554/eLife.02626 (PMC4359374; doi:10.7554/eLife.02626)
Supplement: Supplementary file 2. — Deeply conserved CRMs within 2.5 kb of a lead GWAS SNP were overlapped with RegulomeDB annotated SNPs. SNPs with a high confidence evidence of regulatory potenital are shown (evidence levels 1 and 2 from Regulome DB). DOI: http://dx.doi.org/10.7554/eLife.02626.028 [file elife02626s007.xlsx]

## Sheet: Supplemental File 2 
Chr.	start	end	Shared Species	GWAS	Summary	dbSNPid	Evidence
chr1	157948453	157949064	4	C-reactive protein, Other metabolic traits, Lung cancer, Select biomarker traits	liver, other measurement, cancer	rs76790776, rs78356833	2b, 5
chr1	228361903	228362441	2	HDL cholesterol, Triglycerides	blood lipid	rs116455781, rs74931164	2a, 4
chr1	228361042	228361718	3	HDL cholesterol, Triglycerides	blood lipid	rs115560944, rs61100243, rs3795774, rs117511483	2b, 2b, 5, 5
chr1	227063477	227063840	2	Endometriosis, Basal cell carcinoma (cutaneous)	reproductive, cancer	rs78244763, rs117368833, rs77567694, rs79417715, rs2073489	2b, 2b, 3a, 3a, 4
chr1	173387770	173388084	2	Alcohol dependence	nervous system	rs4279882, rs75612672, rs6425230	2b, 5, 5
chr4	155700667	155701115	5	Fibrinogen	liver	rs17032052, rs79791373, rs7686002	2b, 4, 4
chr5	131826889	131827369	3	Fibrinogen	liver	rs2549005, rs79627002	2b, 4
chr5	150419738	150420089	3	Systemic sclerosis	immune system	rs75954108, rs9324672, rs78561516, rs80237011	2b, 2b, 4, 4
chr6	109022583	109023076	3	Normalized brain volume	nervous system	rs75635038, rs79413370, rs115290565	2b, 5, 6
chr7	151038674	151039057	2	Chronic kidney disease	kidney	rs3750177, rs2142172	2b, 4
chr11	45827080	45827384	4	Fasting glucose-related traits	blood sugar	rs78455013, rs3808976	2b, 4
chr12	6449754	6450461	3	Hip geometry	body measurement	rs4149625, rs4149571, rs4149624, rs76512272	2b, 2b, 2b, 2b
chr13	73640327	73640858	5	Sudden cardiac arrest	cardiovascular	rs78681191, rs75646883, rs77327570	2b, 4, 7
chr16	83546564	83547028	2	Height	body measurement	rs78871086, rs78853752, rs77607480, rs115219771, rs68068436, rs117559644	2b, 3a, 4, 4, 5, 5
chr18	45410576	45411069	3	HDL cholesterol	blood lipid	rs1792668, rs80088876, rs77022527, rs79383946	1f, 5, 6, 6
chr20	42473286	42473584	5	C-reactive protein, HDL cholesterol	liver, blood lipid	rs78070461, rs115508681, rs78178222	2b, 2b, 5
