# Supplementary material for: Multi-species, multi-transcription factor binding highlights conserved control of tissue-specific biological pathways
Source: eLife. 2014 Oct 3;3:e02626. doi: 10.7554/eLife.02626 (PMC4359374; doi:10.7554/eLife.02626)
Supplement: Supplementary file 3. — Tally of genes with HGMD regulatory mutations that overlap liver CRMs or singletons. DOI: http://dx.doi.org/10.7554/eLife.02626.029 [file elife02626s008.xlsx]

## Sheet: Supplemental File 4
A) HGMD genes associated with regulatory mutations
	Human only	Any Shared	Total HGMD regulatory mutation overlaps
CRM	33	73	106
Singleton	15	36	51
Total	48	109	157
B) HGMD genes associated with disease causing regulatory mutations
	Human only	Any Shared	Total HGMD regulatory disease mutation overlaps
CRM	8	19	27
Singleton	0	8	8
Total	8	27	35
C) Tally of ChIP events overlapping HGMD regulatory mutations
	Shared in primate only	Deeply shared	Beyond primate
CRM	10	47	63
Singleton	8	21	29
Total	18	68	92
D) Tally of ChIP events overlapping disease "DM" HGMD regulatory mutations
	Shared in primate only	Deeply shared	Beyond primate
CRM	1	13	13
Singleton	1	6	6
Total	2	19	19
